# Supplementary material
Source: PubMed Central journal article supplement (PMC7833029)
Supplement: NIHMS1659462-supplement-Appendix_A.pdf [file NIHMS1659462-supplement-Appendix_A.pdf]

Appendix A.

# All Results

- Study Dir 1
- Study Dir 2
- Study Dir 3
- Study Dir 4
- Study Dir 5
- Study Dir 6
- Study Rep 01
- Study Rep 02
- Study Rep 03
- Study Rep 04
- Study Rep 05
- Study Rep 06
- Study Rep 07
- Study Rep 08
- Study Rep 09
- Study Rep 10
- Study Rep 11
- Study Rep 12
- Study Rep 13
- Study Rep 14
- Study Rep 15
- Study Rep 16
- Study Rep 17
- Study Rep 18
- Study Rep 19
- Study Rep 20
- Study Rep 21
- Study Rep 22
- Study Rep 23
- Study Rep 24
- Study Rep 25
- Study Rep 26
- Study Rep 27
- Study Rep 28
- Study Rep 29
- Study Rep 30
- Study Rep 31
- Study Rep 32

- Study Rep 33
- Study Rep 34
- Study Rep 35
- Study Rep 36
- Study Rep 37
- Study Rep 38
- Study Rep 39
- Study Rep 40

## Study Dir 1

### Comparison of Table 1 Values for Study Dir 1

| Variable                                          | Exp       |         |          |          | Study     |           |          | Ref      |              |
|---------------------------------------------------|-----------|---------|----------|----------|-----------|-----------|----------|----------|--------------|
|                                                   | Study Exp | Aet Exp | Exp Diff | Std Diff | Study Ref | Aet Ref   | Ref Diff | Std Diff | Diff of Diff |
| Number of patients                                | 687,637   | 691,272 | -3,635   | -        | 985,653   | 1,001,665 | -16,012  | -        | 12,377       |
| Age                                               | 51.2      | 50.9    | 0.3      | 0.0      | 51.7      | 51.7      | -0.0     | -0.0     | 0.4          |
| Combined Comorbidity Score                        | -0.1      | -0.1    | -0.0     | -0.0     | 0.2       | 0.2       | 0.0      | 0.0      | -0.0         |
| Number of Unique Generics Dispensed               | 3.5       | 3.6     | -0.1     | -0.0     | 4.3       | 4.5       | -0.2     | -0.0     | 0.1          |
| Number of Filled Rx                               | 8.0       | 8.4     | -0.4     | -0.0     | 10.2      | 10.8      | -0.6     | -0.0     | 0.2          |
| Number of inpatient hospital encounters (IP)      | 0.1       | 0.1     | 0.0      | 0.1      | 0.1       | 0.1       | -0.0     | -0.1     | 0.1          |
| Number of non-acute institutional encounters (IS) | 0.0       | -       | -        | -        | 0.0       | -         | -        | -        | -            |
| Number of emergency room encounters (ED)          | 0.2       | 0.2     | 0.0      | 0.0      | 0.2       | 0.2       | -0.0     | -0.0     | 0.0          |

|                                            |     |     |      |      |     |     |      |      |      |
|--------------------------------------------|-----|-----|------|------|-----|-----|------|------|------|
| Number of ambulatory encounters (AV)       | 4.3 | 4.8 | -0.5 | -0.1 | 5.9 | 6.7 | -0.8 | -0.1 | 0.2  |
| Number of other ambulatory encounters (OA) | 0.0 | 0.3 | -0.3 | -0.1 | 0.2 | 0.4 | -0.2 | -0.1 | -0.1 |
| 0-44                                       | 27% | 27% | 1%   | -    | 27% | 25% | 2%   | -    | -1%  |
| 45-54                                      | 34% | 33% | 0%   | -    | 28% | 28% | 1%   | -    | -0%  |
| 55-64                                      | 32% | 32% | 0%   | -    | 34% | 34% | 1%   | -    | -0%  |
| 65-150                                     | 7%  | 8%  | -1%  | -    | 11% | 12% | -2%  | -    | 1%   |
| Gender (F)                                 | 40% | 40% | -0%  | -    | 51% | 51% | -0%  | -    | 0%   |
| Allergic Reactions                         | 8%  | 6%  | 1%   | -    | 9%  | 7%  | 2%   | -    | -0%  |
| Diabetes                                   | 21% | 21% | 0%   | -    | 13% | 14% | -0%  | -    | 0%   |
| Heart Failure                              | 1%  | 0%  | 1%   | -    | 3%  | 1%  | 2%   | -    | -1%  |
| Ischemic Heart Disease                     | 4%  | 4%  | -0%  | -    | 12% | 13% | -0%  | -    | 0%   |
| NSAID                                      | 11% | 10% | 2%   | -    | 12% | 10% | 2%   | -    | -0%  |

## Comparison of Health Results for Study Dir 1 (DT1)

### Basic Parameters

| Outcome    | Parameter               | Study Exp | Action Exp | Study Ref | Action Ref |
|------------|-------------------------|-----------|------------|-----------|------------|
| Angioedema | Number of outcomes      | 176       | 163        | 216       | 206        |
| Angioedema | Number of patients      | 687,637   | 691,272    | 985,653   | 1,001,665  |
| Angioedema | Number of person-years  | 530,301   | 508,374    | 850,164   | 818,770    |
| Angioedema | Risk per 1000           | 0.26      | 0.24       | 0.22      | 0.21       |
| Angioedema | Incidence rate per 1000 | 0.33      | 0.32       | 0.25      | 0.25       |

### Treatment Effect Estimates

| Outcome    | Parameter           | Study Value | Study CI     | Action Value | Action CI    |
|------------|---------------------|-------------|--------------|--------------|--------------|
| Angioedema | Unadjusted estimate | 1.27        | (1.04, 1.55) | 1.24         | (1.03, 1.45) |

|            |                   |      |              |      |              |
|------------|-------------------|------|--------------|------|--------------|
| Angioedema | Adjusted estimate | 1.46 | (1.19, 1.80) | 1.41 | (1.20, 1.62) |
|------------|-------------------|------|--------------|------|--------------|

## Study Dir 2

### Comparison of Table 1 Values for Study Dir 2

| Variable                                          | Study   |         | Exp  |          | Study   |         | Ref    |          | Diff  |
|---------------------------------------------------|---------|---------|------|----------|---------|---------|--------|----------|-------|
|                                                   | Exp     | Aet Exp | Diff | Std Diff | Ref     | Aet Ref | Diff   | Std Diff |       |
| Number of patients                                | 333,603 | 334,506 | -903 | -        | 410,139 | 414,724 | -4,585 | -        | 3,682 |
| Age                                               | 50.7    | 50.3    | 0.4  | 0.0      | 50.1    | 50.1    | 0.0    | 0.0      | 0.3   |
| Combined Comorbidity Score                        | -0.1    | -0.1    | -0.0 | -0.0     | 0.3     | 0.3     | 0.0    | 0.0      | -0.0  |
| Number of Unique Generics Dispensed               | 3.4     | 3.7     | -0.3 | -0.1     | 4.3     | 4.7     | -0.4   | -0.1     | 0.1   |
| Number of Filled Rx                               | 7.7     | 8.5     | -0.8 | -0.1     | 9.9     | 11.0    | -1.1   | -0.1     | 0.3   |
| Number of inpatient hospital encounters (IP)      | 0.1     | 0.1     | 0.0  | 0.0      | 0.2     | 0.2     | -0.0   | -0.0     | 0.0   |
| Number of non-acute institutional encounters (IS) | 0.0     | 0.1     | -0.1 | -0.1     | 0.1     | 0.1     | -0.0   | -0.0     | -0.0  |
| Number of emergency room encounters (ED)          | 0.2     | 0.2     | -0.0 | -0.0     | 0.3     | 0.3     | 0.0    | 0.0      | -0.0  |
| Number of ambulatory encounters (AV)              | 5.2     | 5.8     | -0.6 | -0.1     | 8.0     | 8.6     | -0.6   | -0.0     | 0.0   |
| Number of other ambulatory encounters (OA)        | 0.2     | 0.4     | -0.2 | -0.1     | 0.3     | 0.6     | -0.3   | -0.1     | 0.1   |
| 0-44                                              | 29%     | 29%     | 0%   | -        | 33%     | 32%     | 1%     | -        | -0%   |
| 45-54                                             | 34%     | 33%     | 0%   | -        | 28%     | 27%     | 0%     | -        | -0%   |

|                        |     |     |     |   |     |     |     |   |     |
|------------------------|-----|-----|-----|---|-----|-----|-----|---|-----|
| 55-64                  | 31% | 30% | 0%  | - | 31% | 30% | 0%  | - | -0% |
| 65-150                 | 6%  | 7%  | -1% | - | 9%  | 10% | -1% | - | 1%  |
| Gender (F)             | 41% | 41% | -0% | - | 53% | 53% | -0% | - | -0% |
| Allergic Reactions     | 10% | 8%  | 2%  | - | 12% | 10% | 2%  | - | -0% |
| Diabetes               | 23% | 23% | -0% | - | 14% | 14% | -0% | - | 0%  |
| Heart Failure          | 1%  | 0%  | 1%  | - | 4%  | 2%  | 2%  | - | -1% |
| Ischemic Heart Disease | 4%  | 4%  | -0% | - | 13% | 14% | -0% | - | 0%  |
| NSAID                  | 14% | 12% | 2%  | - | 15% | 13% | 2%  | - | -0% |

## Comparison of Health Results for Study Dir 2 (DT2)

### Basic Parameters

| Outcome    | Parameter               | Study Exp | Action Exp | Study Ref | Action Ref |
|------------|-------------------------|-----------|------------|-----------|------------|
| Angioedema | Number of outcomes      | 70        | 66         | 45        | 45         |
| Angioedema | Number of patients      | 333,603   | 334,506    | 410,139   | 414,724    |
| Angioedema | Number of person-years  | 172,083   | 166,091    | 201,603   | 195,311    |
| Angioedema | Risk per 1000           | 0.21      | 0.20       | 0.11      | 0.11       |
| Angioedema | Incidence rate per 1000 | 0.41      | 0.40       | 0.22      | 0.23       |

### Treatment Effect Estimates

| Outcome    | Parameter           | Study Value | Study CI     | Action Value | Action CI    |
|------------|---------------------|-------------|--------------|--------------|--------------|
| Angioedema | Unadjusted estimate | 1.85        | (1.27, 2.68) | 1.75         | (1.37, 2.13) |
| Angioedema | Adjusted estimate   | 2.43        | (1.62, 3.65) | 2.34         | (1.93, 2.75) |

## Study Dir 3

## Comparison of Table 1 Values for Study Dir 3

| Variable                                          | Study  | Aet    | Exp    | Exp      | Ref       |           |          |          |              |
|---------------------------------------------------|--------|--------|--------|----------|-----------|-----------|----------|----------|--------------|
|                                                   | Exp    | Exp    | Diff   | Std Diff | Study Ref | Aet Ref   | Ref Diff | Std Diff | Diff of Diff |
| Number of patients                                | 92,596 | 95,633 | -3,037 | -        | 2,530,418 | 2,552,384 | -21,966  | -        | 18,929       |
| Age                                               | 51.9   | 51.2   | 0.7    | 0.1      | 41.5      | 41.0      | 0.5      | 0.0      | 0.3          |
| Number of Unique Generics Dispensed               | 4.9    | 5.2    | -0.3   | -0.1     | 3.0       | 3.2       | -0.2     | -0.1     | -0.1         |
| Number of Filled Rx                               | 11.5   | 12.4   | -0.9   | -0.1     | 6.6       | 7.2       | -0.6     | -0.1     | -0.3         |
| Number of inpatient hospital encounters (IP)      | 0.1    | 0.1    | -0.0   | -0.0     | 0.1       | 0.1       | 0.0      | 0.0      | -0.0         |
| Number of non-acute institutional encounters (IS) | 0.1    | 0.1    | -0.0   | -0.0     | 0.0       | 0.0       | -0.0     | -0.0     | -0.0         |
| Number of emergency room encounters (ED)          | 0.4    | 0.4    | -0.0   | -0.0     | 0.3       | 0.3       | 0.0      | 0.0      | -0.0         |
| Number of ambulatory encounters (AV)              | 8.2    | 9.8    | -1.6   | -0.1     | 5.1       | 5.9       | -0.8     | -0.1     | -0.8         |
| Number of other ambulatory encounters (OA)        | 0.4    | 0.7    | -0.3   | -0.1     | 0.2       | 0.3       | -0.1     | -0.0     | -0.2         |
| Age 0-44                                          | 27%    | 26%    | 2%     | -        | 57%       | 51%       | 6%       | -        | -4%          |
| Age 45-54                                         | 28%    | 28%    | -0%    | -        | 23%       | 23%       | -0%      | -        | -0%          |
| Age 55-64                                         | 33%    | 34%    | -1%    | -        | 17%       | 17%       | -0%      | -        | -1%          |
| Age 65-150                                        | 12%    | 11%    | 1%     | -        | 3%        | 3%        | 0%       | -        | 1%           |
| Female                                            | 56%    | 56%    | -0%    | -        | 57%       | 57%       | -0%      | -        | -0%          |
| Combined Comorbidity Score                        | 0%     | -      | -      | -        | -         | -         | -        | -        | -            |
| Angina                                            | 1%     | 1%     | 0%     | -        | 0%        | 0%        | 0%       | -        | 0%           |
| Congestive Heart Failure                          | 1%     | 0%     | 1%     | -        | 0%        | 0%        | 0%       | -        | 1%           |
| Diabetes                                          | 11%    | 11%    | -0%    | -        | 7%        | 7%        | -0%      | -        | -0%          |

|                        |     |     |     |   |     |     |     |   |     |
|------------------------|-----|-----|-----|---|-----|-----|-----|---|-----|
| GI bleed               | 2%  | 2%  | 0%  | - | 1%  | 1%  | -0% | - | 0%  |
| Hypertension           | 30% | 30% | 0%  | - | 17% | 17% | -0% | - | 0%  |
| Ischemic Heart Disease | 5%  | 5%  | 0%  | - | 0%  | 2%  | -2% | - | 2%  |
| OA                     | 21% | 22% | -0% | - | 5%  | 5%  | -0% | - | 0%  |
| Peptic Ulcer Disease   | 0%  | 0%  | -0% | - | 0%  | 0%  | -0% | - | -0% |
| RA                     | 2%  | 3%  | -0% | - | 1%  | 1%  | -0% | - | -0% |
| Clopidogrel            | 2%  | 2%  | 0%  | - | 1%  | 1%  | -0% | - | 0%  |
| PPI                    | 16% | 17% | -1% | - | 7%  | 8%  | -0% | - | -1% |
| Statin                 | 22% | 23% | -1% | - | 12% | 12% | -0% | - | -0% |
| Warfarin               | 3%  | 3%  | 0%  | - | 0%  | 0%  | -0% | - | 0%  |

## Comparison of Health Results for Study Dir 3 (DT3)

### Basic Parameters

| Outcome  | Parameter               | Study Exp | Action Exp | Study Ref | Action Ref |
|----------|-------------------------|-----------|------------|-----------|------------|
| GI Bleed | Number of outcomes      | 137       | 135        | 1,420     | 1,478      |
| GI Bleed | Number of patients      | 92,596    | 95,633     | 2,530,418 | 2,552,384  |
| GI Bleed | Number of person-years  | 22,136    | 22,885     | 393,315   | 388,528    |
| GI Bleed | Risk per 1000           | 1.48      | 1.41       | 0.56      | 0.58       |
| GI Bleed | Incidence rate per 1000 | 6.19      | 5.90       | 3.61      | 3.80       |

### Treatment Effect Estimates

| Outcome  | Parameter           | Study Value | Study CI     | Action Value | Action CI    |
|----------|---------------------|-------------|--------------|--------------|--------------|
| GI Bleed | Unadjusted estimate | 1.64        | (1.37, 1.96) | 1.49         | (1.31, 1.67) |
| GI Bleed | Adjusted estimate   | 1.04        | (0.87, 1.25) | 0.86         | (0.68, 1.05) |

# Study Dir 4

## Comparison of Table 1 Values for Study Dir 4

| Variable                                          | Study   |         |          |              | Ref       |         | Diff     |              |             |
|---------------------------------------------------|---------|---------|----------|--------------|-----------|---------|----------|--------------|-------------|
|                                                   | Exp     | Aet Exp | Exp Diff | Exp Std Diff | Study Ref | Aet Ref | Ref Diff | Ref Std Diff | Ref of Diff |
| Number of patients                                | 253,528 | 253,513 | 15       | -            | 422,025   | 422,601 | -576     | -            | 591         |
| Age                                               | 53.7    | 53.4    | 0.3      | 0.0          | 52.9      | 52.7    | 0.2      | 0.0          | 0.1         |
| Combined Comorbidity Score                        | 0.1     | 0.0     | 0.1      | 0.1          | 0.0       | 0.0     | -0.0     | -0.0         | 0.1         |
| Number of Unique Generics Dispensed               | 4.1     | 4.4     | -0.3     | -0.1         | 3.8       | 4.1     | -0.3     | -0.1         | -0.1        |
| Number of Filled Rx                               | 9.5     | 10.4    | -0.9     | -0.1         | 8.8       | 9.5     | -0.7     | -0.1         | -0.2        |
| Number of inpatient hospital encounters (IP)      | 0.1     | 0.5     | -0.4     | -0.2         | 0.1       | 0.5     | -0.4     | -0.2         | -0.0        |
| Number of non-acute institutional encounters (IS) | 0.0     | 0.0     | -0.0     | -0.0         | 0.0       | 0.0     | -0.0     | -0.0         | 0.0         |
| Number of emergency room encounters (ED)          | 0.2     | 0.2     | -0.0     | -0.0         | 0.2       | 0.2     | -0.0     | -0.0         | -0.0        |
| Number of ambulatory encounters (AV)              | 6.2     | 7.3     | -1.1     | -0.1         | 5.9       | 6.9     | -1.0     | -0.1         | -0.1        |
| Number of other ambulatory encounters (OA)        | 0.3     | 0.4     | -0.1     | -0.0         | 0.2       | 0.4     | -0.2     | -0.1         | 0.1         |
| 0-44                                              | 19%     | 19%     | 0%       | -            | 21%       | 21%     | 0%       | -            | -0%         |
| 45-54                                             | 34%     | 34%     | 0%       | -            | 35%       | 34%     | 0%       | -            | 0%          |
| 55-64                                             | 38%     | 38%     | 0%       | -            | 36%       | 36%     | 0%       | -            | -0%         |
| 65-150                                            | 9%      | 10%     | -1%      | -            | 8%        | 9%      | -1%      | -            | 0%          |
| Gender (F)                                        | 40%     | 40%     | -0%      | -            | 46%       | 46%     | -0%      | -            | 0%          |
| Atrial fibrillation                               | 2%      | 2%      | -0%      | -            | 2%        | 2%      | -0%      | -            | 0%          |
| Chest pain                                        | 13%     | 13%     | -0%      | -            | 11%       | 11%     | -0%      | -            | 0%          |
| Conduction Disorders                              | 1%      | 1%      | -0%      | -            | 1%        | 1%      | -0%      | -            | 0%          |



|                                    |     |     |     |   |     |     |     |   |     |
|------------------------------------|-----|-----|-----|---|-----|-----|-----|---|-----|
| Congestive Heart Failure           | 2%  | 2%  | -0% | - | 2%  | 2%  | -0% | - | 0%  |
| CVD symptoms                       | 6%  | 6%  | -0% | - | 6%  | 6%  | -0% | - | 0%  |
| Depression                         | 6%  | 6%  | 0%  | - | 7%  | 7%  | -0% | - | 0%  |
| Diabetes                           | 24% | 24% | -0% | - | 22% | 22% | -0% | - | -0% |
| Hypertension                       | 49% | 49% | -0% | - | 45% | 45% | -0% | - | 0%  |
| Ischemic Heart Disease             | 14% | 14% | -0% | - | 7%  | 7%  | -0% | - | 0%  |
| Disorders of Lipid Metabolism      | 68% | 68% | 0%  | - | 61% | 61% | 0%  | - | -0% |
| Prior MI                           | 1%  | 1%  | -0% | - | 1%  | 1%  | -0% | - | -0% |
| Peripheral Vasc Disease            | 2%  | 3%  | -0% | - | 2%  | 2%  | -0% | - | 0%  |
| Post Surgical Aortocoronary Bypass | 1%  | 1%  | -0% | - | 0%  | 1%  | -0% | - | 0%  |
| Stroke TIA                         | 3%  | 3%  | -0% | - | 3%  | 3%  | -0% | - | 0%  |

## Comparison of Health Results for Study Dir 4 (DT4)

### Basic Parameters

| Outcome             | Parameter               | Study Exp | Action Exp | Study Ref | Action Ref |
|---------------------|-------------------------|-----------|------------|-----------|------------|
| ACS Hospitalization | Number of outcomes      | 597       | 575        | 725       | 711        |
| ACS Hospitalization | Number of patients      | 253,528   | 253,513    | 422,025   | 422,601    |
| ACS Hospitalization | Number of person-years  | 133,252   | 127,460    | 241,780   | 232,198    |
| ACS Hospitalization | Risk per 1000           | 2.35      | 2.27       | 1.72      | 1.68       |
| ACS Hospitalization | Incidence rate per 1000 | 4.48      | 4.51       | 3.00      | 3.06       |

### Treatment Effect Estimates

| Outcome             | Parameter           | Study Value | Study CI     | Action Value | Action CI    |
|---------------------|---------------------|-------------|--------------|--------------|--------------|
| ACS Hospitalization | Unadjusted estimate | 1.45        | (1.30, 1.62) | 1.43         | (1.32, 1.54) |
| ACS Hospitalization | Adjusted estimate   | 1.16        | (1.04, 1.30) | 1.18         | (1.06, 1.29) |

## Study Dir 5

### Comparison of Table 1 Values for Study Dir 5

| Variable                                     | Study Exp | Aet Exp | Exp Diff | Exp Std Diff | Study Ref | Aet Ref | Ref Diff | Ref Std Diff | Diff of Diff |
|----------------------------------------------|-----------|---------|----------|--------------|-----------|---------|----------|--------------|--------------|
| Number of subjects                           | 6,598     | 6,039   | 559      | -            | 13,872    | 13,929  | -57      | -            | 616          |
| Sex, female                                  | 56%       | 56%     | 0%       | -            | 57%       | 57%     | 0%       | -            | -0%          |
| Race, white                                  | 85%       | 85%     | -0%      | -            | 85%       | 85%     | -0%      | -            | -0%          |
| Race, black                                  | 10%       | 10%     | -0%      | -            | 9%        | 9%      | 0%       | -            | -0%          |
| Race, other                                  | 5%        | 5%      | 0%       | -            | 5%        | 5%      | 0%       | -            | 0%           |
| Age group, < 70                              | 36%       | 34%     | 2%       | -            | 35%       | 33%     | 2%       | -            | -0%          |
| Age group, 70-79                             | 34%       | 35%     | -1%      | -            | 36%       | 36%     | -0%      | -            | -0%          |
| Age group, 80+                               | 29%       | 31%     | -2%      | -            | 29%       | 31%     | -2%      | -            | 0%           |
| Comorbidity, high cholesterol                | 55%       | 59%     | -4%      | -            | 56%       | 60%     | -4%      | -            | 0%           |
| Comorbidity, hypertension                    | 93%       | 95%     | -2%      | -            | 94%       | 95%     | -2%      | -            | -0%          |
| Comorbidity, previous ischemic heart disease | 74%       | 77%     | -3%      | -            | 76%       | 79%     | -4%      | -            | 1%           |
| Comorbidity, diabetes                        | 83%       | 84%     | -1%      | -            | 84%       | 86%     | -1%      | -            | 1%           |

### Comparison of Health Results for Study Dir 5 (DT5)

#### Basic Parameters

| Outcome | Parameter              | Study Exp | Aetion Exp | Study Ref | Aetion Ref |
|---------|------------------------|-----------|------------|-----------|------------|
| Angina  | Number of outcomes     | 1,195     | 869        | 2,517     | 2,027      |
| Angina  | Number of patients     | 6,598     | 6,039      | 13,872    | 13,929     |
| Angina  | Number of person-years | -         | 6,055      | -         | 13,967     |
| Angina  | Risk per 1000          | 181.12    | 143.90     | 181.44    | 145.52     |

|                        |                         |        |        |        |        |
|------------------------|-------------------------|--------|--------|--------|--------|
| Angina                 | Incidence rate per 1000 | -      | 143.50 | -      | 145.13 |
| Any cardiac event      | Number of outcomes      | 5,287  | 4,711  | 11,370 | 11,169 |
| Any cardiac event      | Number of patients      | 6,598  | 6,039  | 13,872 | 13,929 |
| Any cardiac event      | Number of person-years  | -      | 6,055  | -      | 13,967 |
| Any cardiac event      | Risk per 1000           | 801.30 | 780.10 | 819.64 | 801.85 |
| Any cardiac event      | Incidence rate per 1000 | -      | 777.96 | -      | 799.66 |
| Heart failure          | Number of outcomes      | 3,505  | 3,102  | 7,536  | 7,476  |
| Heart failure          | Number of patients      | 6,598  | 6,039  | 13,872 | 13,929 |
| Heart failure          | Number of person-years  | -      | 6,055  | -      | 13,967 |
| Heart failure          | Risk per 1000           | 531.22 | 513.66 | 543.25 | 536.72 |
| Heart failure          | Incidence rate per 1000 | -      | 512.26 | -      | 535.26 |
| Ischemic heart disease | Number of outcomes      | 4,723  | 4,114  | 10,228 | 9,840  |
| Ischemic heart disease | Number of patients      | 6,598  | 6,039  | 13,872 | 13,929 |
| Ischemic heart disease | Number of person-years  | -      | 6,055  | -      | 13,967 |
| Ischemic heart disease | Risk per 1000           | 715.82 | 681.24 | 737.31 | 706.44 |
| Ischemic heart disease | Incidence rate per 1000 | -      | 679.38 | -      | 704.51 |

### Treatment Effect Estimates

| Outcome                | Parameter           | Study Value | Study CI     | Action Value | Action CI    |
|------------------------|---------------------|-------------|--------------|--------------|--------------|
| Angina                 | Unadjusted estimate | 0.98        | (0.93, 1.04) | 0.99         | (0.90, 1.07) |
| Angina                 | Adjusted estimate   | -           | (-, -)       | 1.01         | (0.92, 1.10) |
| Any cardiac event      | Unadjusted estimate | 0.97        | (0.93, 1.00) | 0.88         | (0.80, 0.95) |
| Any cardiac event      | Adjusted estimate   | -           | (-, -)       | 0.91         | (0.83, 0.99) |
| Heart failure          | Unadjusted estimate | 0.97        | (0.93, 1.01) | 0.91         | (0.85, 0.97) |
| Heart failure          | Adjusted estimate   | 0.98        | (0.93, 1.05) | 0.94         | (0.88, 1.00) |
| Ischemic heart disease | Unadjusted estimate | 0.96        | (0.93, 1.00) | 0.89         | (0.82, 0.95) |
| Ischemic heart disease | Adjusted estimate   | -           | (-, -)       | 0.92         | (0.85, 0.98) |

# Study Dir 6

## Comparison of Table 1 Values for Study Dir 6

| Variable                                       | Study   | Aet     | Diff   | Std Diff |
|------------------------------------------------|---------|---------|--------|----------|
| Number of patients                             | 315,495 | 317,945 | -2,450 | -        |
| Age                                            | -       | 73.5    | -      | -        |
| Sex (Male)                                     | 43%     | 43%     | 0%     | -        |
| Sex (Female)                                   | 57%     | 57%     | -0%    | -        |
| Race (White)                                   | 84%     | 84%     | -0%    | -        |
| Race (Black)                                   | 11%     | 11%     | 0%     | -        |
| Race (Other)                                   | 5%      | 5%      | 0%     | -        |
| Alzheimer or related disorders or senile       | 52%     | 50%     | 2%     | -        |
| Heart failure                                  | 75%     | 74%     | 1%     | -        |
| Chronic kidney disease                         | 59%     | 56%     | 3%     | -        |
| Cancer-female breast/colorectal/prostate/lung  | 19%     | 16%     | 3%     | -        |
| Chronic obstructive pulmonary disease (COPD)   | 51%     | 48%     | 3%     | -        |
| Depression                                     | 50%     | 45%     | 5%     | -        |
| Diabetes                                       | 79%     | 63%     | 17%    | -        |
| Ischemic heart disease                         | 87%     | 85%     | 2%     | -        |
| Osteoporosis                                   | 33%     | 33%     | 1%     | -        |
| Rheumatoid arthritis or osteoarthritis (RA/OA) | 36%     | 32%     | 4%     | -        |
| Stroke/Transient ischemic attack               | 20%     | 14%     | 5%     | -        |

# Study Rep 01

## Comparison of Table 1 Values for Study Rep 01

| Variable               | Study Exp | Aet Exp | Exp Diff | Exp Std Diff | Study Ref | Aet Ref | Ref Diff | Ref Std Diff | Diff of Diff |
|------------------------|-----------|---------|----------|--------------|-----------|---------|----------|--------------|--------------|
| Number of patients     | 1,329     | 1,245   | 84       | -            | 4,190     | 3,889   | 301      | -            | -217         |
| Age; mean (sd)         | 51.1      | 51.0    | 0.1      | 0.0          | 46.4      | 46.1    | 0.3      | 0.0          | -0.2         |
| Age < 20               | 11%       | 12%     | -1%      | -            | 18%       | 15%     | 3%       | -            | -4%          |
| Age 20 - 40            | 9%        | 8%      | 1%       | -            | 18%       | 17%     | 1%       | -            | 0%           |
| Age 40 - 60            | 46%       | 47%     | -1%      | -            | 38%       | 41%     | -3%      | -            | 2%           |
| Age 60 - 80            | 33%       | 32%     | 1%       | -            | 25%       | 26%     | -1%      | -            | 2%           |
| Age > 80               | 1%        | 1%      | -0%      | -            | 1%        | 1%      | 0%       | -            | -0%          |
| Ex Smoker              | 13%       | -       | -        | -            | 15%       | -       | -        | -            | -            |
| Missing Smoking        | 33%       | -       | -        | -            | 34%       | -       | -        | -            | -            |
| Never Smoker           | 35%       | -       | -        | -            | 35%       | -       | -        | -            | -            |
| Current Smoker         | 18%       | -       | -        | -            | 15%       | -       | -        | -            | -            |
| Klinefelter's Syndrome | 2%        | 2%      | 0%       | -            | 4%        | 5%      | -1%      | -            | 1%           |
| Hypogonadism           | 3%        | 6%      | -3%      | -            | 10%       | 12%     | -2%      | -            | -0%          |
| Erectile Dysfunction   | 13%       | 15%     | -2%      | -            | 13%       | 15%     | -2%      | -            | -0%          |
| CVD                    | 11%       | -       | -        | -            | 10%       | -       | -        | -            | -            |
| Hypertension           | 17%       | 18%     | -1%      | -            | 16%       | 20%     | -4%      | -            | 2%           |
| Diabetes               | 8%        | 11%     | -3%      | -            | 11%       | 14%     | -3%      | -            | 0%           |
| Asthma or COPD         | 12%       | 14%     | -2%      | -            | 14%       | 15%     | -1%      | -            | -0%          |
| Alcohol Abuse          | 6%        | 3%      | 3%       | -            | 6%        | 4%      | 2%       | -            | 1%           |
| Index Year 1988-1993   | 21%       | 11%     | 10%      | -            | 19%       | 7%      | 12%      | -            | -2%          |
| Index Year 1994-1997   | 31%       | 22%     | 9%       | -            | 17%       | 12%     | 5%       | -            | 3%           |

|                        |     |     |     |   |     |     |      |   |     |
|------------------------|-----|-----|-----|---|-----|-----|------|---|-----|
| Index Year 1998-2001   | 24% | 31% | -7% | - | 21% | 24% | -3%  | - | -3% |
| Index Year 2002-2005   | 15% | 22% | -7% | - | 22% | 29% | -7%  | - | -0% |
| Index Year 2006-2009   | 9%  | 15% | -6% | - | 22% | 29% | -7%  | - | 1%  |
| BMI <20                | 3%  | 2%  | 1%  | - | 2%  | 3%  | -1%  | - | 2%  |
| BMI 20 - 25            | 15% | 24% | -9% | - | 17% | 22% | -5%  | - | -4% |
| BMI 26 - 30            | 23% | 24% | -1% | - | 27% | 21% | 6%   | - | -7% |
| BMI 30+                | 18% | 16% | 2%  | - | 13% | 23% | -10% | - | 12% |
| BMI Unknown            | 42% | -   | -   | - | 41% | -   | -    | - | -   |
| Never smoker           | 35% | 40% | -5% | - | 35% | 41% | -6%  | - | 1%  |
| Current smoker         | 15% | 17% | -2% | - | 18% | 17% | 1%   | - | -3% |
| Past smoker            | 15% | 18% | -3% | - | 13% | 18% | -5%  | - | 2%  |
| Unknown smoking status | 34% | -   | -   | - | 33% | -   | -    | - | -   |

## Comparison of Health Results for Study Rep 01 (RS01)

### Basic Parameters

| Outcome         | Parameter               | Study Exp | Aetion Exp | Study Ref | Aetion Ref |
|-----------------|-------------------------|-----------|------------|-----------|------------|
| Prostate Cancer | Number of outcomes      | 28        | 35         | 48        | 66         |
| Prostate Cancer | Number of patients      | 1,329     | 1,245      | 4,190     | 3,889      |
| Prostate Cancer | Number of person-years  | 11,412    | 13,448     | 27,052    | 35,774     |
| Prostate Cancer | Risk per 1000           | 21.07     | 28.11      | 11.46     | 16.97      |
| Prostate Cancer | Incidence rate per 1000 | 2.45      | 2.60       | 1.77      | 1.84       |

### Treatment Effect Estimates

| Outcome         | Parameter           | Study Value | Study CI     | Aetion Value | Aetion CI    |
|-----------------|---------------------|-------------|--------------|--------------|--------------|
| Prostate Cancer | Unadjusted estimate | 1.38        | (0.87, 2.20) | 1.40         | (0.99, 1.81) |

Prostate Cancer Adjusted estimate 1.08 (0.68, 1.71) - (-, -)

## Study Rep 02

### Comparison of Table 1 Values for Study Rep 02

| Variable                                           | Study  |         | Exp Diff | Exp Std Diff | Ref       |           |          | Ref Std Diff | Diff of Diff |
|----------------------------------------------------|--------|---------|----------|--------------|-----------|-----------|----------|--------------|--------------|
|                                                    | Exp    | Aet Exp |          |              | Study Ref | Aet Ref   | Ref Diff |              |              |
| Number of patients                                 | 45,510 | 163,493 | -117,983 | -            | 349,529   | 1,268,234 | -918,705 | -            | 800,722      |
| Number of office visits; mean (sd)                 | 9.0    | 7.5     | 1.5      | 0.2          | 8.5       | 6.9       | 1.6      | 0.2          | -0.1         |
| Number of distinct (3-digit) diagnoses; mean (SD)  | 6.7    | -       | -        | -            | 6.6       | -         | -        | -            | -            |
| Number of distinct prescription classes; mean (SD) | 6.2    | -       | -        | -            | 5.7       | -         | -        | -            | -            |
| Number of hospitalizations; mean (sd)              | 0.1    | 0.1     | -0.0     | -0.1         | 0.2       | 0.1       | 0.1      | 0.1          | -0.1         |
| Male                                               | 48%    | 52%     | -4%      | -            | 49%       | 51%       | -2%      | -            | -1%          |
| Use of Anti-arrhythmic                             | 1%     | -       | -        | -            | 1%        | -         | -        | -            | -            |
| Use of ACE or ARB                                  | 24%    | 22%     | 3%       | -            | 25%       | 22%       | 3%       | -            | -0%          |
| Use of anti-anginals                               | 5%     | 3%      | 2%       | -            | 5%        | 2%        | 3%       | -            | -1%          |
| Use of beta blocker                                | 19%    | 18%     | 1%       | -            | 19%       | 17%       | 2%       | -            | -1%          |
| Use of CCB                                         | 13%    | 10%     | 3%       | -            | 14%       | 11%       | 3%       | -            | -0%          |
| Use of loop diuretics                              | 6%     | 4%      | 2%       | -            | 6%        | 4%        | 2%       | -            | 0%           |
| Use of thiazide diuretics                          | 2%     | 2%      | 0%       | -            | 2%        | 2%        | 0%       | -            | 0%           |

|                                        |     |     |     |   |     |     |     |   |     |
|----------------------------------------|-----|-----|-----|---|-----|-----|-----|---|-----|
| Use of thiazide diuretics              | 7%  | 7%  | 2%  | - | 10% | 8%  | 2%  | - | -0% |
| Use of digoxin                         | 2%  | 1%  | 1%  | - | 2%  | 1%  | 1%  | - | -0% |
| Use of non-statin lipid lowering agent | 14% | 5%  | 9%  | - | 6%  | 3%  | 4%  | - | 5%  |
| Use of heparin                         | 0%  | 1%  | -0% | - | 0%  | 1%  | -0% | - | -0% |
| Use of coumarins                       | 3%  | 2%  | 1%  | - | 3%  | 2%  | 1%  | - | -0% |
| Use of platelet inhibitors             | 4%  | 5%  | -0% | - | 4%  | 3%  | 1%  | - | -1% |
| Use of PVD drugs                       | 1%  | -   | -   | - | 1%  | -   | -   | - | -   |
| Use of estrogen                        | 13% | 6%  | 7%  | - | 12% | 6%  | 6%  | - | 1%  |
| Diabetes                               | 22% | 23% | -1% | - | 23% | 23% | -0% | - | -1% |
| Heart valve disorder                   | 4%  | 5%  | -1% | - | 5%  | 5%  | 0%  | - | -1% |
| Myocarditis                            | 1%  | 0%  | 1%  | - | 2%  | 0%  | 1%  | - | -0% |
| Hypertension                           | 43% | 50% | -7% | - | 41% | 49% | -8% | - | 1%  |
| Coronary atherosclerosis               | 13% | 13% | -0% | - | 14% | 10% | 4%  | - | -5% |
| Pulmonary heart disease                | 0%  | 0%  | 0%  | - | 1%  | 0%  | 0%  | - | -0% |
| Other heart disease                    | 2%  | -   | -   | - | 2%  | -   | -   | - | -   |
| Conduction disorder                    | 10% | 1%  | 8%  | - | 10% | 1%  | 9%  | - | -0% |
| V-fib, V-flutter, cardiac arrest       | 0%  | 0%  | -0% | - | 0%  | 0%  | 0%  | - | -0% |
| Heart failure                          | 2%  | 1%  | 1%  | - | 3%  | 1%  | 2%  | - | -1% |
| TIA/Other CVD                          | 2%  | -   | -   | - | 3%  | -   | -   | - | -   |
| Late effects of CVD                    | 0%  | -   | -   | - | 1%  | -   | -   | - | -   |
| Peripheral atherosclerosis/aneurysm    | 3%  | -   | -   | - | 4%  | -   | -   | - | -   |
| Arterial embolism                      | 0%  | 0%  | 0%  | - | 0%  | 0%  | 0%  | - | -0% |
| Phlebitis                              | 1%  | 1%  | 0%  | - | 1%  | 1%  | 1%  | - | -0% |
| COPD                                   | 6%  | 6%  | 1%  | - | 6%  | 6%  | 0%  | - | 0%  |
| Rheumatoid arthritis                   | 1%  | 1%  | 0%  | - | 1%  | 1%  | 0%  | - | 0%  |
| Osteoarthritis                         | 9%  | 11% | -2% | - | 9%  | 11% | -2% | - | 0%  |
| Disease AMI                            | 2%  | 2%  | 0%  | - | 1%  | 2%  | 1%  | - | 1%  |



|                                                    |     |     |     |   |     |     |     |   |     |
|----------------------------------------------------|-----|-----|-----|---|-----|-----|-----|---|-----|
| Prior AMI                                          | 2%  | 2%  | -0% | - | 4%  | 2%  | 1%  | - | -1% |
| Prior Cerebrovascular Event                        | 4%  | 1%  | 3%  | - | 5%  | 2%  | 3%  | - | -0% |
| Prior Unstable angina                              | 2%  | 2%  | 0%  | - | 3%  | 2%  | 1%  | - | -1% |
| Prior CABG                                         | 1%  | 1%  | 0%  | - | 1%  | 1%  | 1%  | - | -1% |
| Prior Coronary angioplasty                         | 0%  | 0%  | -0% | - | 0%  | 0%  | 0%  | - | -0% |
| Prior Coronary atherectomy and transmyocardial rev | 0%  | 0%  | -0% | - | 0%  | 0%  | -0% | - | -0% |
| Prior Coronary stent procedure                     | 2%  | 3%  | -0% | - | 3%  | 2%  | 1%  | - | -1% |
| Prior Carotid revascularization                    | 0%  | 0%  | 0%  | - | 0%  | 0%  | 0%  | - | -0% |
| Hospitalizations                                   | 11% | 10% | 1%  | - | 15% | 12% | 3%  | - | -2% |

## Comparison of Health Results for Study Rep 02 (RS02)

### Basic Parameters

| Outcome                           | Parameter               | Study Exp | Aetion Exp | Study Ref | Aetion Ref |
|-----------------------------------|-------------------------|-----------|------------|-----------|------------|
| Acute MI                          | Number of outcomes      | 120       | 642        | 1,054     | 6,270      |
| Acute MI                          | Number of patients      | 45,510    | 163,493    | 349,529   | 1,268,234  |
| Acute MI                          | Number of person-years  | 29,350    | 129,756    | 236,586   | 1,137,609  |
| Acute MI                          | Risk per 1000           | 2.64      | 3.93       | 3.02      | 4.94       |
| Acute MI                          | Incidence rate per 1000 | 4.09      | 4.95       | 4.46      | 5.51       |
| Coronary & cerebrovascular events | Number of outcomes      | 924       | 4,468      | 8,698     | 37,735     |
| Coronary & cerebrovascular events | Number of patients      | 45,510    | 163,493    | 349,529   | 1,268,234  |
| Coronary & cerebrovascular        | Number of person-       | 28,936    | 126,992    | 232,408   | 1,111,934  |

|                                   |                         |        |         |         |           |
|-----------------------------------|-------------------------|--------|---------|---------|-----------|
| events                            | years                   |        |         |         |           |
| Coronary & cerebrovascular events | Risk per 1000           | 20.30  | 27.33   | 24.88   | 29.75     |
| Coronary & cerebrovascular events | Incidence rate per 1000 | 31.93  | 35.18   | 37.43   | 33.94     |
| Coronary event                    | Number of outcomes      | 722    | 3,761   | 3,313   | 29,743    |
| Coronary event                    | Number of patients      | 45,510 | 163,493 | 349,529 | 1,268,234 |
| Coronary event                    | Number of person-years  | 29,035 | 127,396 | 233,449 | 1,117,600 |
| Coronary event                    | Risk per 1000           | 15.86  | 23.00   | 9.48    | 23.45     |
| Coronary event                    | Incidence rate per 1000 | 24.87  | 29.52   | 14.19   | 26.61     |

**Treatment Effect Estimates**

| Outcome                           | Parameter           | Study Value | Study CI     | Aetion Value | Aetion CI    |
|-----------------------------------|---------------------|-------------|--------------|--------------|--------------|
| Acute MI                          | Unadjusted estimate | 0.91        | (0.75, 1.10) | 0.88         | (0.80, 0.96) |
| Acute MI                          | Adjusted estimate   | 1.06        | (0.87, 1.28) | 0.90         | (0.81, 0.98) |
| Coronary & cerebrovascular events | Unadjusted estimate | 0.84        | (0.78, 0.90) | 0.99         | (0.96, 1.02) |
| Coronary & cerebrovascular events | Adjusted estimate   | 0.99        | (0.92, 1.06) | 0.98         | (0.95, 1.01) |
| Coronary event                    | Unadjusted estimate | 0.86        | (0.79, 0.92) | 1.06         | (1.02, 1.09) |
| Coronary event                    | Adjusted estimate   | 1.01        | (0.93, 1.09) | 1.00         | (0.97, 1.04) |

# Study Rep 03

## Comparison of Table 1 Values for Study Rep 03

| Variable              | Study Exp | Aet Exp | Exp Diff | Exp Std Diff | Study Ref | Aet Ref | Ref Diff | Ref Std Diff | Diff of Diff |
|-----------------------|-----------|---------|----------|--------------|-----------|---------|----------|--------------|--------------|
| Number of patients    | 775       | 2,294   | -1,519   | -            | 958       | 4,246   | -3,288   | -            | 1,769        |
| Charlson index        | 0.5       | 0.7     | -0.2     | -0.2         | 0.4       | 1.0     | -0.6     | -0.4         | 0.4          |
| Any hospitalization   | 131.0     | 0.4     | 130.6    | 10.9         | 242.0     | 0.6     | 241.4    | 13.6         | -110.8       |
| Outpatient visits     | 15.0      | 7.9     | 7.1      | 0.8          | 13.0      | 6.9     | 6.1      | 0.7          | 1.0          |
| Number of Rx          | 17.0      | 25.2    | -8.2     | -0.5         | 13.0      | 21.8    | -8.8     | -0.6         | 0.6          |
| Age 0 - 20            | 5%        | 5%      | 0%       | -            | 8%        | 5%      | 3%       | -            | -3%          |
| Age 21 - 40           | 40%       | 37%     | 3%       | -            | 38%       | 31%     | 7%       | -            | -4%          |
| Age 41 - 64           | 55%       | 53%     | 2%       | -            | 53%       | 50%     | 3%       | -            | -0%          |
| Female                | 79%       | 81%     | -2%      | -            | 59%       | 64%     | -5%      | -            | 3%           |
| Male                  | 21%       | 19%     | 2%       | -            | 41%       | 36%     | 5%       | -            | -3%          |
| Northeast Region      | 11%       | 20%     | -9%      | -            | 14%       | 22%     | -8%      | -            | -1%          |
| North Central Region  | 24%       | 23%     | 1%       | -            | 32%       | 24%     | 8%       | -            | -7%          |
| South Region          | 49%       | 40%     | 9%       | -            | 40%       | 34%     | 6%       | -            | 3%           |
| West Region           | 15%       | 15%     | 0%       | -            | 14%       | 18%     | -4%      | -            | 4%           |
| Crohn's Disease       | 55%       | 58%     | -3%      | -            | 55%       | 55%     | 0%       | -            | -3%          |
| Ulcerative Colitis    | 43%       | 48%     | -5%      | -            | 44%       | 51%     | -7%      | -            | 2%           |
| Indeterminate         | 1%        | -       | -        | -            | 1%        | -       | -        | -            | -            |
| Seizure diagnosis     | 5%        | 4%      | 1%       | -            | 12%       | 11%     | 1%       | -            | 0%           |
| Migraine              | 37%       | 34%     | 3%       | -            | 9%        | 11%     | -2%      | -            | 5%           |
| Bipolar disorder      | 12%       | 17%     | -5%      | -            | 24%       | 27%     | -3%      | -            | -2%          |
| Obesity               | 3%        | 7%      | -4%      | -            | 1%        | 4%      | -3%      | -            | -0%          |
| Peripheral neuropathy | 3%        | 0%      | 3%       | -            | 1%        | 1%      | 0%       | -            | 2%           |
| Congenital brain      | 0%        | -       | -        | -            | 0%        | -       | -        | -            | -            |

## abnormality

|                     |     |     |     |   |     |     |     |   |     |
|---------------------|-----|-----|-----|---|-----|-----|-----|---|-----|
| IBS                 | 6%  | 9%  | -3% | - | 5%  | 7%  | -2% | - | -0% |
| Weight loss         | 1%  | 3%  | -2% | - | 2%  | 5%  | -3% | - | 0%  |
| Malnutrition        | 1%  | 1%  | -0% | - | 1%  | 3%  | -2% | - | 2%  |
| Anemia              | 5%  | 7%  | -2% | - | 6%  | 7%  | -1% | - | -0% |
| 5-ASA               | 73% | 39% | 34% | - | 75% | 39% | 36% | - | -1% |
| 6MP/AZA             | 28% | 14% | 14% | - | 28% | 13% | 15% | - | -1% |
| Methotrexate        | 3%  | 3%  | 0%  | - | 2%  | 2%  | 0%  | - | -0% |
| Cyclosporine        | 1%  | 1%  | -0% | - | 1%  | 1%  | -0% | - | -0% |
| Enteral budesonide  | 13% | -   | -   | - | 11% | -   | -   | - | -   |
| Rectal steroid      | 5%  | 1%  | 4%  | - | 1%  | 1%  | -1% | - | 4%  |
| Any biologic        | 21% | 15% | 6%  | - | 17% | 14% | 3%  | - | 3%  |
| Infliximab          | 15% | 9%  | 6%  | - | 12% | 7%  | 5%  | - | 2%  |
| Adalimumab          | 6%  | 6%  | 0%  | - | 5%  | 6%  | -1% | - | 1%  |
| Certolizumab        | 0%  | 1%  | -1% | - | 0%  | 1%  | -1% | - | 0%  |
| Natalizumab         | 0%  | 0%  | -0% | - | 0%  | 0%  | -0% | - | 0%  |
| EGD (upper)         | 13% | 16% | -3% | - | 11% | 15% | -4% | - | 1%  |
| Colonoscopy (lower) | 31% | 30% | 1%  | - | 29% | 28% | 1%  | - | 1%  |
| Any endoscopy       | 38% | 37% | 1%  | - | 36% | 37% | -1% | - | 1%  |

## Comparison of Health Results for Study Rep 03 (RS03)

### Basic Parameters

| Outcome     | Parameter               | Study Exp | Aetion Exp | Study Ref | Aetion Ref |
|-------------|-------------------------|-----------|------------|-----------|------------|
| Steroid use | Number of outcomes      | -         | 676        | -         | 1,238      |
| Steroid use | Number of patients      | 775       | 2,294      | 958       | 4,246      |
| Steroid use | Number of person-years  | -         | 867        | -         | 1,859      |
| Steroid use | Risk per 1000           | -         | 294.68     | -         | 291.57     |
| Steroid use | Incidence rate per 1000 | -         | 779.21     | -         | 665.75     |

## Treatment Effect Estimates

| Outcome     | Parameter           | Study Value | Study CI     | Action Value | Action CI    |
|-------------|---------------------|-------------|--------------|--------------|--------------|
| Steroid use | Unadjusted estimate | 1.05        | (0.73, 1.52) | 1.08         | (0.99, 1.18) |
| Steroid use | Adjusted estimate   | 1.14        | (0.74, 1.73) | 0.98         | (0.88, 1.08) |

## Study Rep 04

### Comparison of Table 1 Values for Study Rep 04

| Variable                              | Study Exp | Aet Exp | Exp Diff | Exp Std Diff | Study Ref | Aet Ref | Ref Diff | Ref Std Diff | Diff of Diff |
|---------------------------------------|-----------|---------|----------|--------------|-----------|---------|----------|--------------|--------------|
| Number of subjects                    | 3,825     | 5,466   | -1,641   | -            | 21,728    | 34,455  | -12,727  | -            | 11,086       |
| Age, mean                             | 46.2      | 50.5    | -4.3     | -0.3         | 42.1      | 49.8    | -7.6     | -0.5         | 3.3          |
| Women                                 | 65%       | 64%     | 1%       | -            | 55%       | 54%     | 0%       | -            | 1%           |
| Arthritis                             | 27%       | 17%     | 9%       | -            | 24%       | 20%     | 4%       | -            | 5%           |
| Back pain                             | 23%       | 25%     | -2%      | -            | 13%       | 16%     | -2%      | -            | 1%           |
| Benzodiazepine use                    | 19%       | 16%     | 3%       | -            | 14%       | 12%     | 2%       | -            | 1%           |
| Drug abuse excluding opioids          | 1%        | 2%      | -1%      | -            | 3%        | 5%      | -2%      | -            | 1%           |
| Mood/anxiety disorders and depression | 10%       | 10%     | -0%      | -            | 10%       | 11%     | -1%      | -            | 1%           |
| Fractures                             | 2%        | 3%      | -0%      | -            | 7%        | 6%      | 0%       | -            | -1%          |
| Headaches                             | 5%        | 7%      | -3%      | -            | 4%        | 6%      | -2%      | -            | -1%          |
| Malignancy                            | 15%       | 10%     | 6%       | -            | 20%       | 15%     | 5%       | -            | 1%           |
| Musculoskeletal pain                  | 25%       | -       | -        | -            | 23%       | -       | -        | -            | -            |

|                          |    |    |     |   |     |    |     |   |     |
|--------------------------|----|----|-----|---|-----|----|-----|---|-----|
| Other                    | 1% | -  | -   | - | 1%  | -  | -   | - | -   |
| Reproductive system pain | 2% | -  | -   | - | 2%  | -  | -   | - | -   |
| Visceral pain            | 8% | -  | -   | - | 13% | -  | -   | - | -   |
| Wound injury             | 1% | -  | -   | - | 4%  | -  | -   | - | -   |
| Neuropathy               | 4% | 6% | -2% | - | 2%  | 3% | -1% | - | -1% |

## Comparison of Health Results for Study Rep 04 (RS04)

### Basic Parameters

| Outcome      | Parameter               | Study Exp | Aetion Exp | Study Ref | Aetion Ref |
|--------------|-------------------------|-----------|------------|-----------|------------|
| Opioid abuse | Number of outcomes      | 12        | 12         | 105       | 123        |
| Opioid abuse | Number of patients      | 21,728    | 5,466      | 3,825     | 34,455     |
| Opioid abuse | Number of person-years  | -         | 5,445      | -         | 34,291     |
| Opioid abuse | Risk per 1000           | 0.55      | 2.20       | 27.45     | 3.57       |
| Opioid abuse | Incidence rate per 1000 | -         | 2.20       | -         | 3.59       |

### Treatment Effect Estimates

| Outcome      | Parameter           | Study Value | Study CI     | Aetion Value | Aetion CI    |
|--------------|---------------------|-------------|--------------|--------------|--------------|
| Opioid abuse | Unadjusted estimate | 0.65        | (0.32, 1.20) | 0.61         | (0.02, 1.21) |
| Opioid abuse | Adjusted estimate   | 0.42        | (0.22, 0.79) | 0.67         | (0.07, 1.27) |

## Study Rep 05

### Comparison of Table 1 Values for Study Rep 05

| Study | Aet | Exp | Exp Std | Study | Aet | Ref | Ref Std | Diff of |
|-------|-----|-----|---------|-------|-----|-----|---------|---------|
|-------|-----|-----|---------|-------|-----|-----|---------|---------|

| Variable                        | Exp   | Exp   | Diff | Diff | Ref   | Ref   | Diff | Diff | Diff |
|---------------------------------|-------|-------|------|------|-------|-------|------|------|------|
| Number of subjects              | 3,069 | 2,976 | 93   | -    | 6,893 | 6,255 | 638  | -    | -545 |
| Age, mean                       | 64.0  | 62.5  | 1.5  | -    | -     | 62.1  | -    | -    | -    |
| Men                             | 40%   | 41%   | -1%  | -    | 48%   | 48%   | -0%  | -    | -0%  |
| Charlson comorbidity index = 0  | 54%   | 15%   | 39%  | -    | 49%   | 11%   | 38%  | -    | 1%   |
| Charlson comorbidity index = 1  | 36%   | 12%   | 24%  | -    | 40%   | 11%   | 29%  | -    | -5%  |
| Charlson comorbidity index = 2  | 7%    | 24%   | -16% | -    | 9%    | 23%   | -14% | -    | -2%  |
| Charlson comorbidity index = 3+ | 3%    | 49%   | -46% | -    | 3%    | 55%   | -52% | -    | 6%   |
| Health Plan = PPO               | 51%   | 51%   | -0%  | -    | 54%   | 54%   | -0%  | -    | 0%   |
| Health Plan = Comprehensive     | 23%   | 21%   | 2%   | -    | 23%   | 21%   | 2%   | -    | -0%  |
| Health Plan = HMO               | 15%   | 16%   | -1%  | -    | 13%   | 14%   | -1%  | -    | -0%  |
| Health Plan = POS               | 6%    | 6%    | -0%  | -    | 6%    | 7%    | -1%  | -    | 0%   |
| Health Plan = CDHP              | 2%    | 3%    | -1%  | -    | 2%    | 2%    | -1%  | -    | -0%  |
| Health Plan = EPI               | 1%    | 2%    | -1%  | -    | 1%    | 1%    | -0%  | -    | -1%  |
| Health Plan = HDHP              | 1%    | 1%    | 0%   | -    | 1%    | 1%    | -0%  | -    | 0%   |
| Epidural anesthesia             | 28%   | 25%   | 3%   | -    | 53%   | 53%   | -0%  | -    | 4%   |

## Study Rep 06

### Comparison of Table 1 Values for Study Rep 06

Exp

Ref Diff

| Variable                                                       | Study<br>Exp | Aet<br>Exp | Exp<br>Diff | Std<br>Diff | Study<br>Ref | Aet<br>Ref | Ref<br>Diff | Std<br>Diff | of<br>Diff |
|----------------------------------------------------------------|--------------|------------|-------------|-------------|--------------|------------|-------------|-------------|------------|
| Number of subjects                                             | 19,760       | 17,652     | 2,108       | -           | 12,261       | 15,770     | -3,509      | -           | 5,617      |
| Age, mean                                                      | -            | 46.3       | -           | -           | -            | 37.8       | -           | -           | -          |
| Men                                                            | 100%         | 100%       | 0%          | -           | 100%         | 100%       | 0%          | -           | 0%         |
| Onset of epilepsy (dx) prior to start<br>of follow-up (AED rx) | 84%          | 77%        | 7%          | -           | 80%          | 78%        | 2%          | -           | 5%         |
| 1993-1995                                                      | 32%          | 16%        | 16%         | -           | 15%          | 9%         | 6%          | -           | 10%        |
| 1996-1998                                                      | 16%          | 11%        | 6%          | -           | 13%          | 8%         | 5%          | -           | 1%         |
| 1999-2001                                                      | 22%          | 16%        | 6%          | -           | 22%          | 15%        | 6%          | -           | -1%        |
| 2002-2004                                                      | 16%          | 34%        | -19%        | -           | 22%          | 34%        | -11%        | -           | -8%        |
| 2005-2008                                                      | 14%          | 23%        | -9%         | -           | 27%          | 34%        | -7%         | -           | -2%        |
| Fall in last 3 years                                           | 3%           | 4%         | -1%         | -           | 4%           | 3%         | 1%          | -           | -2%        |
| Fracture in last 3 years                                       | 21%          | 6%         | 14%         | -           | 20%          | 6%         | 14%         | -           | 1%         |
| Malnutrition, malabsorption, or liver<br>disease               | 3%           | 0%         | 3%          | -           | 3%           | 0%         | 2%          | -           | 0%         |
| Hyperthyroidism,<br>hyperparathyroidism, or<br>hypogonadism    | 0%           | 0%         | 0%          | -           | 0%           | 0%         | 0%          | -           | -0%        |
| Diabetes mellitus                                              | 4%           | 5%         | -1%         | -           | 4%           | 5%         | -1%         | -           | -0%        |
| Osteoporosis                                                   | 1%           | 1%         | 0%          | -           | 0%           | 0%         | 0%          | -           | 0%         |
| Arthritis                                                      | 12%          | 8%         | 4%          | -           | 11%          | 7%         | 4%          | -           | -0%        |
| Stroke or TIA                                                  | 13%          | 7%         | 5%          | -           | 11%          | 7%         | 4%          | -           | 2%         |
| Cancer                                                         | 12%          | 8%         | 4%          | -           | 10%          | 7%         | 3%          | -           | 0%         |
| Non-epilepsy nervous system and<br>sense organ diseases        | 44%          | -          | -           | -           | 48%          | -          | -           | -           | -          |
| Mental disorders                                               | 34%          | -          | -           | -           | 36%          | -          | -           | -           | -          |
| Corticosteroids                                                | 5%           | 5%         | -0%         | -           | 4%           | 5%         | -1%         | -           | 1%         |
| Osteoporosis treatments                                        | 1%           | 1%         | 0%          | -           | 2%           | 1%         | 1%          | -           | -0%        |
| Dementia treatments                                            | 0%           | 0%         | 0%          | -           | 0%           | 0%         | 0%          | -           | -0%        |
| Drugs used in psychoses and                                    | 8%           | 6%         | 2%          | -           | 7%           | 6%         | 1%          | -           | 1%         |



| Drug used in psychosis and related disorders       | 3%  | 3%  | 2%  | - | 1%  | 3%  | 1% | - | 1%  |
|----------------------------------------------------|-----|-----|-----|---|-----|-----|----|---|-----|
| Hypnotics and anxiolytics                          | 15% | 13% | 2%  | - | 14% | 13% | 1% | - | 1%  |
| Tricyclic and related anti-depressants             | 6%  | 4%  | 1%  | - | 6%  | 4%  | 2% | - | -1% |
| Other anti-depressants                             | 7%  | 6%  | 0%  | - | 9%  | 7%  | 2% | - | -1% |
| Opioid analgesics                                  | 17% | 13% | 3%  | - | 16% | 13% | 4% | - | -0% |
| Other analgesics                                   | 32% | 34% | -2% | - | 33% | 32% | 1% | - | -3% |
| Parkinson's medications                            | 5%  | 2%  | 3%  | - | 4%  | 2%  | 3% | - | 0%  |
| Medications used for nutrition and blood disorders | 11% | -   | -   | - | 11% | -   | -  | - | -   |

## Comparison of Health Results for Study Rep 06 (RS06M)

### Basic Parameters

| Outcome  | Parameter               | Study Exp | Action Exp | Study Ref | Action Ref |
|----------|-------------------------|-----------|------------|-----------|------------|
| Fracture | Number of outcomes      | 2,286     | 1,432      | 1,033     | 1,143      |
| Fracture | Number of patients      | 19,760    | 17,652     | 12,261    | 15,770     |
| Fracture | Number of person-years  | 95,027    | 57,751     | 45,106    | 42,678     |
| Fracture | Risk per 1000           | 115.69    | 81.12      | 84.25     | 72.48      |
| Fracture | Incidence rate per 1000 | 24.06     | 24.80      | 22.90     | 26.78      |

### Treatment Effect Estimates

| Outcome  | Parameter           | Study Value | Study CI     | Action Value | Action CI    |
|----------|---------------------|-------------|--------------|--------------|--------------|
| Fracture | Unadjusted estimate | 1.05        | (0.96, 1.15) | 0.94         | (0.86, 1.02) |
| Fracture | Adjusted estimate   | 1.09        | (0.98, 1.20) | 0.95         | (0.87, 1.03) |

# Study Rep 07

## Comparison of Table 1 Values for Study Rep 07

| Variable                                 | Exp       |          |          |          | Study     |          |          | Ref      |              |
|------------------------------------------|-----------|----------|----------|----------|-----------|----------|----------|----------|--------------|
|                                          | Study Exp | Aet Exp  | Exp Diff | Std Diff | Study Ref | Aet Ref  | Ref Diff | Std Diff | Diff of Diff |
| Number of subjects                       | 20,058    | 18,175   | 1,883    | -        | 244,497   | 281,698  | -37,201  | -        | 39,084       |
| Age, mean                                | -         | 52.4     | -        | -        | -         | 49.7     | -        | -        | -            |
| Total costs, mean (paper reports median) | 3,236.0   | 12,104.6 | -8,868.6 | -        | 1,661.0   | 11,013.0 | -9,352.0 | -        | 483.4        |
| Men                                      | 46%       | 46%      | -0%      | -        | 50%       | 47%      | 3%       | -        | -3%          |
| Overweight/obesity                       | 21%       | 19%      | 2%       | -        | 13%       | 11%      | 2%       | -        | 1%           |
| Neuropathy, nephropathy, or retinopathy  | 16%       | 24%      | -9%      | -        | 8%        | 11%      | -3%      | -        | -6%          |
| Insulin use                              | 28%       | 28%      | -0%      | -        | 10%       | 8%       | 3%       | -        | -3%          |
| Chronic pancreatitis                     | 0%        | 0%       | 0%       | -        | 0%        | 0%       | 0%       | -        | -0%          |

## Comparison of Health Results for Study Rep 07 (RS07)

### Basic Parameters

| Outcome            | Parameter               | Study Exp | Aetion Exp | Study Ref | Aetion Ref |
|--------------------|-------------------------|-----------|------------|-----------|------------|
| Acute pancreatitis | Number of outcomes      | 47        | 52         | 472       | 568        |
| Acute pancreatitis | Number of patients      | 20,058    | 18,175     | 244,497   | 281,698    |
| Acute pancreatitis | Number of person-years  | 25,072    | 24,577     | 305,621   | 364,550    |
| Acute pancreatitis | Risk per 1000           | 2.34      | 2.86       | 1.93      | 2.02       |
| Acute pancreatitis | Incidence rate per 1000 | 1.87      | 2.12       | 1.54      | 1.56       |

### Treatment Effect Estimates

| Outcome | Parameter | Study Value | Study CI | Aetion Value | Aetion CI |
|---------|-----------|-------------|----------|--------------|-----------|
|---------|-----------|-------------|----------|--------------|-----------|

|                    |                     |      |              |      |              |
|--------------------|---------------------|------|--------------|------|--------------|
| Acute pancreatitis | Unadjusted estimate | 1.21 | (-, -)       | 1.36 | (1.07, 1.64) |
| Acute pancreatitis | Adjusted estimate   | 1.10 | (0.81, 1.49) | 1.09 | (0.79, 1.39) |

## Study Rep 08

### Comparison of Table 1 Values for Study Rep 08

| Variable                            | Study<br>Exp | Aet<br>Exp | Exp<br>Diff | Exp Std<br>Diff | Study<br>Ref | Aet<br>Ref | Ref<br>Diff | Ref Std<br>Diff | Diff of<br>Diff |
|-------------------------------------|--------------|------------|-------------|-----------------|--------------|------------|-------------|-----------------|-----------------|
| Number of subjects                  | 776          | 1,280      | -504        | -               | 1,919        | 1,588      | 331         | -               | -835            |
| Number PS-matched<br>subjects       | 737          | -          | -           | -               | 737          | -          | -           | -               | -               |
| Age, mean                           | 37.5         | 38.6       | -1.1        | -               | 37.7         | 37.2       | 0.5         | -               | -1.7            |
| Charlson comorbidity<br>index, mean | 0.3          | 0.3        | 0.0         | 0.0             | 0.3          | 0.3        | 0.0         | 0.0             | -0.0            |
| Men                                 | 66%          | 42%        | 23%         | -               | 63%          | 30%        | 33%         | -               | -10%            |
| Psychiatric<br>Hospitalization      | 24%          | 17%        | 7%          | -               | 25%          | 19%        | 6%          | -               | 1%              |
| Diabetes                            | 5%           | 5%         | 0%          | -               | 6%           | 8%         | -2%         | -               | 2%              |
| Hyperlipidemia                      | 17%          | 20%        | -3%         | -               | 18%          | 19%        | -1%         | -               | -2%             |
| Carbamazapine                       | 3%           | 1%         | 2%          | -               | 4%           | 3%         | 1%          | -               | 1%              |
| Lamotrigine                         | 16%          | 13%        | 3%          | -               | 16%          | 24%        | -8%         | -               | 11%             |
| Lithium                             | 14%          | 14%        | 0%          | -               | 14%          | 13%        | 1%          | -               | -1%             |
| Oxcarbazepine                       | 8%           | 4%         | 4%          | -               | 9%           | 7%         | 2%          | -               | 2%              |
| Topirimate                          | 9%           | 6%         | 4%          | -               | 9%           | 8%         | 1%          | -               | 3%              |
| Valproate                           | 22%          | 14%        | 7%          | -               | 21%          | 15%        | 6%          | -               | 1%              |

## Comparison of Health Results for Study Rep 08 (RS08)

### Basic Parameters

| Outcome               | Parameter               | Study Exp | Action Exp | Study Ref | Action Ref |
|-----------------------|-------------------------|-----------|------------|-----------|------------|
| Psych hospitalization | Number of outcomes      | -         | 73         | -         | 61         |
| Psych hospitalization | Number of patients      | 776       | 1,280      | 1,919     | 1,588      |
| Psych hospitalization | Number of person-years  | -         | 279        | -         | 359        |
| Psych hospitalization | Risk per 1000           | -         | 57.03      | -         | 38.41      |
| Psych hospitalization | Incidence rate per 1000 | -         | 260.93     | -         | 169.87     |

### Treatment Effect Estimates

| Outcome               | Parameter           | Study Value | Study CI     | Action Value | Action CI    |
|-----------------------|---------------------|-------------|--------------|--------------|--------------|
| Psych hospitalization | Unadjusted estimate | 1.55        | (1.10, 2.18) | 1.52         | (1.18, 1.86) |
| Psych hospitalization | Adjusted estimate   | 1.55        | (1.10, 2.18) | 1.86         | (1.50, 2.22) |

## Study Rep 09

### Comparison of Table 1 Values for Study Rep 09

| Variable                         | Study Exp | Aet Exp | Exp Diff | Exp Std Diff | Study Ref | Aet Ref | Ref Diff | Ref Std Diff | Diff of Diff |
|----------------------------------|-----------|---------|----------|--------------|-----------|---------|----------|--------------|--------------|
| Number of subjects               | 776       | 3,270   | -2,494   | -            | 2,497     | 1,580   | 917      | -            | -3,411       |
| Number PS-matched subjects       | 770       | -       | -        | -            | 770       | -       | -        | -            | -            |
| Age, mean                        | 37.1      | 38.1    | -1.0     | -0.1         | 36.5      | 37.1    | -0.6     | -0.1         | -0.4         |
| Charlson comorbidity index, mean | 0.2       | 0.3     | -0.1     | -0.1         | 0.2       | 0.3     | -0.1     | -0.1         | -0.0         |

|                             |            |            |     |   |            |            |     |   |     |
|-----------------------------|------------|------------|-----|---|------------|------------|-----|---|-----|
| Men                         | <b>67%</b> | <b>35%</b> | 32% | - | <b>70%</b> | <b>30%</b> | 40% | - | -8% |
| Psychiatric Hospitalization | <b>23%</b> | <b>24%</b> | -1% | - | <b>23%</b> | <b>19%</b> | 4%  | - | -5% |
| Diabetes                    | <b>6%</b>  | <b>7%</b>  | -1% | - | <b>5%</b>  | <b>8%</b>  | -3% | - | 2%  |
| Hyperlipidemia              | <b>17%</b> | <b>18%</b> | -1% | - | <b>17%</b> | <b>19%</b> | -2% | - | 0%  |
| Carbamazepine               | <b>4%</b>  | <b>3%</b>  | 1%  | - | <b>4%</b>  | <b>2%</b>  | 1%  | - | -0% |
| Lamotrigine                 | <b>18%</b> | <b>22%</b> | -4% | - | <b>17%</b> | <b>24%</b> | -7% | - | 3%  |
| Lithium                     | <b>15%</b> | <b>16%</b> | -1% | - | <b>14%</b> | <b>13%</b> | 1%  | - | -3% |
| Oxcarbazepine               | <b>10%</b> | <b>6%</b>  | 4%  | - | <b>9%</b>  | <b>7%</b>  | 2%  | - | 2%  |
| Topiramate                  | <b>10%</b> | <b>7%</b>  | 3%  | - | <b>11%</b> | <b>8%</b>  | 3%  | - | 1%  |
| Valproate                   | <b>21%</b> | <b>15%</b> | 6%  | - | <b>22%</b> | <b>15%</b> | 6%  | - | -0% |

## Study Rep 10

### Comparison of Table 1 Values for Study Rep 10

| Variable                                         | Study        | Aet          | Diff | Std Diff |
|--------------------------------------------------|--------------|--------------|------|----------|
| Number of subjects                               | <b>1,417</b> | <b>1,974</b> | -557 | -        |
| Mean age (SD)                                    | <b>52.2</b>  | <b>51.6</b>  | 0.6  | 0.1      |
| Time to warfarin initiation from index VTE claim | <b>13.1</b>  | -            | -    | -        |
| Baseline ECI Score                               | <b>2.1</b>   | <b>1.8</b>   | 0.3  | 0.2      |
| Female                                           | <b>47%</b>   | <b>48%</b>   | -2%  | -        |
| PE as index VTE event                            | <b>17%</b>   | <b>13%</b>   | 4%   | -        |
| History of Cancer                                | <b>10%</b>   | -            | -    | -        |

# Study Rep 11

## Comparison of Table 1 Values for Study Rep 11

| Variable                   | Study   |          |          | Exp      | Study   |          |          | Ref      |              |
|----------------------------|---------|----------|----------|----------|---------|----------|----------|----------|--------------|
|                            | Exp     | Aet Exp  | Exp Diff | Std Diff | Ref     | Aet Ref  | Ref Diff | Std Diff | Diff of Diff |
| Number of subjects         | 25,719  | 19,809   | 5,910    | -        | 234,536 | 183,826  | 50,710   | -        | -44,800      |
| Number of Physician Visits | 6.9     | 8.8      | -1.9     | -        | 5.4     | 7.2      | -1.8     | -        | -0.1         |
| Total Costs                | 7,473.0 | 16,594.9 | -9,121.9 | -        | 7,386.0 | 15,629.9 | -8,243.9 | -        | -878.1       |
| Number of Drugs Dispensed  | 11.0    | 11.1     | -0.1     | -        | 6.7     | 5.2      | 1.5      | -        | -1.6         |
| Age 0-34                   | 5%      | 5%       | 0%       | -        | 13%     | 17%      | -5%      | -        | 5%           |
| Age 35-44                  | 16%     | 16%      | 1%       | -        | 17%     | 19%      | -2%      | -        | 3%           |
| Age 45-54                  | 34%     | 35%      | -1%      | -        | 28%     | 27%      | 1%       | -        | -1%          |
| Age 55-64                  | 36%     | 37%      | -1%      | -        | 30%     | 26%      | 5%       | -        | -5%          |
| Age 65+                    | 8%      | 8%       | 0%       | -        | 12%     | 11%      | 2%       | -        | -1%          |
| Female                     | 56%     | 56%      | -0%      | -        | 49%     | 53%      | -4%      | -        | 4%           |
| Northeast                  | 8%      | 7%       | 0%       | -        | 10%     | 9%       | 1%       | -        | -0%          |
| Midwest                    | 22%     | 26%      | -4%      | -        | 24%     | 27%      | -3%      | -        | -0%          |
| South                      | 57%     | 55%      | 2%       | -        | 52%     | 50%      | 2%       | -        | 1%           |
| West                       | 13%     | 12%      | 1%       | -        | 15%     | 14%      | 1%       | -        | -0%          |
| Neuropathy                 | 10%     | 13%      | -3%      | -        | 4%      | 4%       | 0%       | -        | -3%          |
| Renal Impairment/Dialysis  | 4%      | 3%       | 1%       | -        | 4%      | 2%       | 2%       | -        | -1%          |
| Retinopathy                | 5%      | 8%       | -3%      | -        | 3%      | 2%       | 1%       | -        | -4%          |
| Hypertension               | 64%     | 72%      | -8%      | -        | 49%     | 48%      | 1%       | -        | -9%          |
| Hyperlipidemia             | 77%     | 76%      | 1%       | -        | 54%     | 47%      | 8%       | -        | -7%          |

|                                                   |     |     |     |   |     |     |     |   |      |
|---------------------------------------------------|-----|-----|-----|---|-----|-----|-----|---|------|
| Ischemic Heart Disease                            | 13% | 16% | -3% | - | 11% | 10% | 0%  | - | -3%  |
| MI                                                | 1%  | 2%  | -1% | - | 2%  | 2%  | -0% | - | -0%  |
| CHF                                               | 3%  | 4%  | -1% | - | 4%  | 3%  | 0%  | - | -1%  |
| Stroke                                            | 2%  | 3%  | -1% | - | 2%  | 3%  | -1% | - | -1%  |
| Alcohol Use/Abuse                                 | 0%  | 0%  | -0% | - | 1%  | 1%  | -0% | - | 0%   |
| Smoking                                           | 2%  | 3%  | -1% | - | 3%  | 4%  | -2% | - | 1%   |
| Overweight/Obesity                                | 19% | 19% | -0% | - | 10% | 11% | -1% | - | 1%   |
| Cholecystitis                                     | 1%  | 1%  | -0% | - | 1%  | 1%  | -0% | - | -0%  |
| Cholelithiasis                                    | 1%  | 0%  | 1%  | - | 1%  | 0%  | 1%  | - | 0%   |
| Prior Cholecystectomy                             | 1%  | 1%  | 0%  | - | 0%  | 1%  | -0% | - | 0%   |
| Endoscopic Retrograde<br>Cholangiopancreatography | 0%  | 0%  | -0% | - | 0%  | 0%  | 0%  | - | -0%  |
| Class I drugs                                     | 52% | 52% | -0% | - | 41% | 39% | 3%  | - | -3%  |
| Class II drugs                                    | 55% | 56% | -2% | - | 42% | 40% | 3%  | - | -4%  |
| Fibrates                                          | 13% | 14% | -1% | - | 6%  | 4%  | 2%  | - | -3%  |
| Statins                                           | 54% | 58% | -4% | - | 33% | 23% | 10% | - | -14% |
| ACE Inhibitors                                    | 42% | 44% | -2% | - | 29% | 20% | 9%  | - | -11% |
| ARBs                                              | 28% | 29% | -1% | - | 15% | 12% | 4%  | - | -5%  |
| Antipsychotics                                    | 1%  | 2%  | -0% | - | 1%  | 1%  | -0% | - | -0%  |
| Non-Alcohol Sedatives                             | 17% | 20% | -3% | - | 12% | 13% | -1% | - | -2%  |
| Non-Steroidal Anti-<br>Inflammatory Drugs         | 23% | 21% | 2%  | - | 18% | 16% | 2%  | - | 0%   |
| Acid-Suppressing Drugs                            | 18% | 20% | -2% | - | 13% | 12% | 1%  | - | -2%  |

## Comparison of Health Results for Study Rep 11 (RS11)

### Basic Parameters

| Outcome            | Parameter          | Study Exp | Action Exp | Study Ref | Action Ref |
|--------------------|--------------------|-----------|------------|-----------|------------|
| Acute pancreatitis | Number of outcomes | 35        | 58         | 520       | 410        |

|                    |                         |        |        |         |         |
|--------------------|-------------------------|--------|--------|---------|---------|
| Acute pancreatitis | Number of patients      | 25,719 | 19,809 | 234,536 | 183,826 |
| Acute pancreatitis | Number of person-years  | 17,630 | 22,536 | 254,868 | 201,582 |
| Acute pancreatitis | Risk per 1000           | 1.36   | 2.93   | 2.22    | 2.23    |
| Acute pancreatitis | Incidence rate per 1000 | 1.99   | 2.57   | 2.04    | 2.03    |

### Treatment Effect Estimates

| Outcome            | Parameter           | Study Value | Study CI     | Action Value | Action CI    |
|--------------------|---------------------|-------------|--------------|--------------|--------------|
| Acute pancreatitis | Unadjusted estimate | 1.00        | (0.70, 1.40) | 1.27         | (0.99, 1.54) |
| Acute pancreatitis | Adjusted estimate   | 0.90        | (0.30, 1.30) | 1.03         | (0.71, 1.34) |

## Study Rep 12

### Comparison of Table 1 Values for Study Rep 12

| Variable                         | Study Exp | Aet Exp | Exp Diff | Exp Std Diff | Study Ref | Aet Ref | Ref Diff | Ref Std Diff | Diff of Diff |
|----------------------------------|-----------|---------|----------|--------------|-----------|---------|----------|--------------|--------------|
| Total sample                     | 506       | 898     | -392     | -            | 612       | 1,751   | -1,139   | -            | 747          |
| Age                              | 59.5      | 58.9    | 0.6      | 0.1          | 58.5      | 58.7    | -0.2     | -0.0         | 0.8          |
| Charlson comorbidity index score | 2.4       | 1.7     | 0.6      | 0.3          | 1.9       | 2.1     | -0.2     | -0.1         | 0.8          |
| Mean overall statin MPR (SD)     | 0.7       | -       | -        | -            | 0.7       | -       | -        | -            | -            |
| Gender = Male                    | 63%       | 58%     | 4%       | -            | 47%       | 51%     | -4%      | -            | 9%           |
| Gender = Female                  | 37%       | 42%     | -4%      | -            | 53%       | 49%     | 4%       | -            | -9%          |
| Age 18-24 years                  | 0%        | 0%      | -0%      | -            | 0%        | 0%      | -0%      | -            | -0%          |
| Age 25-34 years                  | 1%        | 2%      | -0%      | -            | 2%        | 2%      | -0%      | -            | -0%          |
| Age 35-44 years                  | 7%        | 8%      | -2%      | -            | 9%        | 8%      | 1%       | -            | -2%          |



|                               |            |            |      |   |            |            |      |   |      |
|-------------------------------|------------|------------|------|---|------------|------------|------|---|------|
| Age 45–54 years               | <b>24%</b> | <b>23%</b> | 1%   | - | <b>25%</b> | <b>25%</b> | -0%  | - | 1%   |
| Age 55–64 years               | <b>37%</b> | <b>39%</b> | -2%  | - | <b>37%</b> | <b>37%</b> | 1%   | - | -2%  |
| Age 65+ years                 | <b>31%</b> | <b>27%</b> | 4%   | - | <b>27%</b> | <b>28%</b> | -1%  | - | 4%   |
| Northeast                     | <b>48%</b> | <b>11%</b> | 37%  | - | <b>47%</b> | <b>12%</b> | 35%  | - | 2%   |
| South                         | <b>6%</b>  | <b>46%</b> | -41% | - | <b>8%</b>  | <b>48%</b> | -41% | - | 0%   |
| Midwest                       | <b>9%</b>  | <b>26%</b> | -17% | - | <b>7%</b>  | <b>24%</b> | -17% | - | -0%  |
| West                          | <b>8%</b>  | <b>17%</b> | -9%  | - | <b>6%</b>  | <b>16%</b> | -10% | - | 1%   |
| National/other                | <b>30%</b> | <b>0%</b>  | 30%  | - | <b>32%</b> | <b>0%</b>  | 32%  | - | -2%  |
| Health plan type = HMO        | <b>41%</b> | <b>12%</b> | 29%  | - | <b>34%</b> | <b>12%</b> | 22%  | - | 7%   |
| Health plan type = Indemnity  | <b>13%</b> | <b>11%</b> | 2%   | - | <b>13%</b> | <b>11%</b> | 2%   | - | -0%  |
| Health plan type = PPO        | <b>30%</b> | <b>20%</b> | 10%  | - | <b>38%</b> | <b>15%</b> | 23%  | - | -13% |
| Health plan type = POS        | <b>11%</b> | <b>46%</b> | -35% | - | <b>10%</b> | <b>49%</b> | -39% | - | 4%   |
| Health plan type = Other      | <b>5%</b>  | <b>11%</b> | -6%  | - | <b>4%</b>  | <b>12%</b> | -8%  | - | 2%   |
| Payer type = Commercial payer | <b>85%</b> | <b>99%</b> | -14% | - | <b>89%</b> | <b>99%</b> | -10% | - | -4%  |
| Payer type = Medicaid         | <b>3%</b>  | <b>1%</b>  | 1%   | - | <b>4%</b>  | <b>1%</b>  | 3%   | - | -2%  |
| Payer type = Medicare         | <b>13%</b> | <b>0%</b>  | 13%  | - | <b>7%</b>  | <b>0%</b>  | 7%   | - | 6%   |
| Phenytoin                     | <b>72%</b> | -          | -    | - | <b>0%</b>  | -          | -    | - | -    |
| Phenobarbital                 | <b>6%</b>  | -          | -    | - | <b>0%</b>  | -          | -    | - | -    |
| Carbamazepine                 | <b>18%</b> | -          | -    | - | <b>0%</b>  | -          | -    | - | -    |
| Topiramate >=200 mg           | <b>3%</b>  | -          | -    | - | <b>0%</b>  | -          | -    | - | -    |
| Oxcarbazepine >=1200 mg       | <b>1%</b>  | -          | -    | - | <b>0%</b>  | -          | -    | - | -    |
| Lamotrigine                   | <b>0%</b>  | -          | -    | - | <b>7%</b>  | -          | -    | - | -    |
| Gabapentin                    | <b>0%</b>  | -          | -    | - | <b>57%</b> | -          | -    | - | -    |
| Levetiracetam                 | <b>0%</b>  | -          | -    | - | <b>8%</b>  | -          | -    | - | -    |
| Pregabalin                    | <b>0%</b>  | -          | -    | - | <b>0%</b>  | -          | -    | - | -    |
| Zonisamide                    | <b>0%</b>  | -          | -    | - | <b>2%</b>  | -          | -    | - | -    |

|                                 |     |   |   |   |     |   |   |   |   |
|---------------------------------|-----|---|---|---|-----|---|---|---|---|
| Valproate                       | 0%  | - | - | - | 19% | - | - | - | - |
| Topiramate <200 mg              | 0%  | - | - | - | 1%  | - | - | - | - |
| Oxcarbazepine <1200 mg          | 0%  | - | - | - | 5%  | - | - | - | - |
| Mean MPR for initiated AED (SD) | 33% | - | - | - | 34% | - | - | - | - |
| Adherent to initiated AED       | 42% | - | - | - | 35% | - | - | - | - |
| Atorvastatin                    | 77% | - | - | - | 80% | - | - | - | - |
| Simvastatin                     | 17% | - | - | - | 16% | - | - | - | - |
| Lovastatin                      | 6%  | - | - | - | 5%  | - | - | - | - |
| Adherent to statin              | 48% | - | - | - | 45% | - | - | - | - |

## Comparison of Health Results for Study Rep 12 (RS12)

### Basic Parameters

| Outcome             | Parameter               | Study Exp | Action Exp | Study Ref | Action Ref |
|---------------------|-------------------------|-----------|------------|-----------|------------|
| Statin polypharmacy | Number of outcomes      | 30        | 82         | 36        | 181        |
| Statin polypharmacy | Number of patients      | 506       | 898        | 612       | 1,751      |
| Statin polypharmacy | Number of person-years  | -         | 861        | -         | 1,666      |
| Statin polypharmacy | Risk per 1000           | 59.29     | 91.31      | 58.82     | 103.37     |
| Statin polypharmacy | Incidence rate per 1000 | -         | 95.23      | -         | 108.59     |

### Treatment Effect Estimates

| Outcome             | Parameter           | Study Value | Study CI     | Action Value | Action CI    |
|---------------------|---------------------|-------------|--------------|--------------|--------------|
| Statin polypharmacy | Unadjusted estimate | 1.00        | (0.77, 1.32) | 0.87         | (0.60, 1.15) |
| Statin polypharmacy | Adjusted estimate   | -           | (-, -)       | 0.90         | (0.62, 1.17) |

# Study Rep 13

## Comparison of Table 1 Values for Study Rep 13

| Variable                          | Study   | Aet     | Diff  | Std Diff |
|-----------------------------------|---------|---------|-------|----------|
| Number of subjects                | 120,790 | 112,511 | 8,279 | -        |
| Age 18 to < 40                    | 23%     | 20%     | 3%    | -        |
| Age 40 to < 50                    | 23%     | 23%     | 1%    | -        |
| Age 50+                           | 54%     | 58%     | -4%   | -        |
| Female                            | 46%     | 44%     | 3%    | -        |
| Midwest                           | 31%     | 29%     | 2%    | -        |
| Northeast                         | 10%     | 9%      | 1%    | -        |
| South                             | 47%     | 49%     | -3%   | -        |
| West                              | 12%     | 13%     | -0%   | -        |
| ESAs                              | 3%      | 1%      | 3%    | -        |
| Iron                              | 2%      | 0%      | 1%    | -        |
| Red blood cell transfusions (>=1) | 2%      | 3%      | -1%   | -        |
| Anemia                            | 22%     | 22%     | 0%    | -        |
| ASHD                              | 17%     | 18%     | -0%   | -        |
| AMI                               | 3%      | 3%      | -1%   | -        |
| CHF                               | 11%     | 13%     | -2%   | -        |
| CVA/TIA                           | 5%      | 8%      | -3%   | -        |
| PVD                               | 9%      | 13%     | -4%   | -        |
| Dysrhythmia                       | 10%     | 14%     | -5%   | -        |
| Other CVD                         | 14%     | 18%     | -4%   | -        |
| Hypertension                      | 54%     | 63%     | -8%   | -        |
| Hyperlipidemia                    | 32%     | 41%     | -9%   | -        |
| COPD                              | 10%     | 13%     | -3%   | -        |

|                              |     |     |     |   |
|------------------------------|-----|-----|-----|---|
| GI disorders                 | 4%  | 3%  | 1%  | - |
| Liver disease                | 4%  | 7%  | -3% | - |
| Diabetes                     | 35% | 34% | 1%  | - |
| Anticoagulants/antiplatelets | 10% | 9%  | 0%  | - |
| Nephrologist (1 + visits)    | 34% | 28% | 6%  | - |

## Study Rep 14

### Comparison of Table 1 Values for Study Rep 14

| Variable                                       | Study    | Aet     | Diff     | Std Diff |
|------------------------------------------------|----------|---------|----------|----------|
| Number of subjects                             | 177,885  | 116,716 | 61,169   | -        |
| Observation period, days, mean (SD)            | 491.2    | -       | -        | -        |
| Age, years, mean (SD)                          | 54.6     | 54.1    | 0.5      | 0.0      |
| Outpatient services, costs, dollars, mean (SD) | 9,990.1  | -       | -        | -        |
| Inpatient services, costs, dollars, mean (SD)  | 11,258.9 | 0.0     | 11,258.9 | 0.7      |
| Pharmacy costs, costs, dollars, mean (SD)      | 2,355.2  | 4,065.8 | -1,710.6 | -0.2     |
| VTE - DVT only                                 | 74%      | -       | -        | -        |
| VTE - PE only                                  | 15%      | -       | -        | -        |
| VTE - PE and DVT                               | 11%      | -       | -        | -        |
| Female                                         | 57%      | 56%     | 2%       | -        |
| New England                                    | 22%      | 4%      | 18%      | -        |
| South Atlantic                                 | 18%      | 27%     | -9%      | -        |
| Middle Atlantic                                | 22%      | 8%      | 14%      | -        |
| East North Central                             | 11%      | 18%     | -7%      | -        |

|                                          |     |     |      |   |
|------------------------------------------|-----|-----|------|---|
| West South Central                       | 9%  | 12% | -2%  | - |
| Mountain                                 | 7%  | 9%  | -2%  | - |
| West North Central                       | 5%  | 13% | -8%  | - |
| East South Central                       | 3%  | 4%  | -2%  | - |
| Pacific                                  | 3%  | 5%  | -2%  | - |
| Other Region                             | 0%  | 0%  | 0%   | - |
| PPO                                      | 29% | 15% | 14%  | - |
| HMO                                      | 29% | 21% | 8%   | - |
| POS                                      | 38% | 46% | -8%  | - |
| Other Insurance                          | 4%  | 1%  | 4%   | - |
| MI major risk factors                    | 71% | 87% | -16% | - |
| Age 65+                                  | 24% | 23% | 0%   | - |
| Male                                     | 43% | 44% | -2%  | - |
| Hypertension                             | 46% | 52% | -6%  | - |
| Diabetes mellitus                        | 18% | 21% | -3%  | - |
| Hyperlipidemia                           | 39% | 44% | -5%  | - |
| Cardiovascular disease                   | 40% | 43% | -3%  | - |
| Angina pectoris                          | 4%  | 4%  | -0%  | - |
| Previous MI                              | 2%  | 3%  | -1%  | - |
| Coronary artery disease                  | 15% | 18% | -3%  | - |
| Stroke/TIA                               | 10% | 12% | -2%  | - |
| Left ventricular hypertrophy             | 6%  | 8%  | -2%  | - |
| Atrial fibrillation                      | 7%  | 10% | -3%  | - |
| Family history of cardiovascular disease | 1%  | 2%  | -1%  | - |
| Chronic kidney disease                   | 6%  | 8%  | -2%  | - |
| Obesity                                  | 8%  | 11% | -3%  | - |
| Smoking                                  | 6%  | 10% | -5%  | - |
| Major risk factors=0                     | 19% | -   | -    | - |

|                                       |     |     |      |   |
|---------------------------------------|-----|-----|------|---|
| Major risk factors=1                  | 22% | -   | -    | - |
| Major risk factors=2                  | 18% | -   | -    | - |
| Major risk factors>=3                 | 41% | -   | -    | - |
| Exploratory risk factors              | 33% | 55% | -23% | - |
| Atherosclerosis                       | 5%  | 7%  | -1%  | - |
| Acute respiratory infections          | 29% | 30% | -2%  | - |
| Hypothyroidism                        | 0%  | 3%  | -3%  | - |
| Bacteraemia                           | 1%  | 2%  | -1%  | - |
| Chronic obstructive pulmonary disease | 14% | 16% | -3%  | - |
| Rheumatoid arthritis                  | 3%  | 3%  | 0%   | - |
| Substance abuse                       | 6%  | 10% | -4%  | - |
| Social risk factors                   | 0%  | 1%  | -0%  | - |
| Stress                                | 0%  | 1%  | -0%  | - |
| NSAIDS                                | 24% | 25% | -1%  | - |
| Calcium channel blockers              | 12% | 15% | -3%  | - |
| Beta blockers                         | 20% | 22% | -1%  | - |
| Anti-coagulants                       | 11% | 14% | -3%  | - |
| Anti-platelets                        | 5%  | 6%  | -0%  | - |
| Anti-hyperlipidemics                  | 26% | 28% | -2%  | - |
| Anti-hypertensives                    | 29% | 46% | -17% | - |
| 2005 Index                            | 28% | 33% | -5%  | - |
| 2006 Index                            | 24% | 24% | 0%   | - |
| 2007 Index                            | 25% | 23% | 2%   | - |
| 2008 Index                            | 23% | 20% | 3%   | - |

# Study Rep 15

## Comparison of Table 1 Values for Study Rep 15

| Variable           | Study     | Aet       | Diff     | Std Diff |
|--------------------|-----------|-----------|----------|----------|
| Number of subjects | 1,935,552 | 2,089,749 | -154,197 | -        |
| Age 0-4            | 22%       | 28%       | -7%      | -        |
| Age 5-9            | 29%       | -         | -        | -        |
| Age 10-14          | 30%       | -         | -        | -        |
| Age 15-17          | 19%       | 17%       | 2%       | -        |
| Male               | 51%       | 51%       | 0%       | -        |
| Female             | 49%       | 49%       | -0%      | -        |

# Study Rep 16

## Comparison of Table 1 Values for Study Rep 16

| Variable                              | Study | Aet   | Diff   | Std Diff |
|---------------------------------------|-------|-------|--------|----------|
| Number of subjects                    | 5,086 | 6,577 | -1,491 | -        |
| Age Median, Mean, SD                  | 48.3  | 47.2  | 1.2    | 0.2      |
| Charlson comorbidity score, mean (SD) | 1.8   | 0.8   | 0.9    | 0.6      |
| Female                                | 34%   | 36%   | -2%    | -        |
| Male                                  | 66%   | 64%   | 2%     | -        |
| Age < 18                              | 0%    | 0%    | 0%     | -        |
| Age 18                                | 1%    | 1%    | -0%    | -        |

|                                             |     |     |      |   |
|---------------------------------------------|-----|-----|------|---|
| Age 25                                      | 3%  | 4%  | -1%  | - |
| Age 35                                      | 21% | 26% | -5%  | - |
| Age 45                                      | 56% | 56% | 0%   | - |
| Age 55                                      | 17% | 12% | 5%   | - |
| Age 65+                                     | 1%  | 1%  | 0%   | - |
| Northeast                                   | 60% | 10% | 51%  | - |
| South                                       | 23% | 54% | -31% | - |
| Midwest                                     | 9%  | 23% | -14% | - |
| West                                        | 7%  | 13% | -5%  | - |
| Unknown Region                              | 0%  | 0%  | -0%  | - |
| HMO                                         | 40% | 38% | 2%   | - |
| POS                                         | 17% | 30% | -13% | - |
| PPO                                         | 41% | 21% | 20%  | - |
| Ind                                         | 2%  | 0%  | 2%   | - |
| Other Insurance                             | 1%  | 11% | -10% | - |
| Commercial                                  | 98% | 97% | 1%   | - |
| Medicaid                                    | 0%  | 3%  | -3%  | - |
| Medicare                                    | 0%  | 0%  | 0%   | - |
| Peginterferon alfa-2a plus ribavirin        | 48% | 38% | 10%  | - |
| Peginterferon alfa-2b plus ribavirin        | 44% | 45% | -1%  | - |
| Peginterferon alfa-2a monotherapy           | 3%  | 6%  | -3%  | - |
| Peginterferon alfa-2b monotherapy           | 3%  | 10% | -7%  | - |
| Consensus interferon regimen with ribavirin | 2%  | 2%  | 0%   | - |

## Study Rep 17



## Comparison of Table 1 Values for Study Rep 17

| Variable                      | Study    | Aet      | Diff      | Std Diff |
|-------------------------------|----------|----------|-----------|----------|
| Number of subjects            | 221      | 306      | -85       | -        |
| Age                           | 39.1     | 38.2     | 0.9       | 0.1      |
| Charlson comorbidity index    | 1.2      | 1.0      | 0.2       | 0.1      |
| Physician office visits       | 8.2      | 9.8      | -1.6      | -0.1     |
| Hospitalizations LOS, days    | 7.8      | 2.1      | 5.7       | 0.8      |
| Mean total healthcare charges | 30,177.0 | 52,018.9 | -21,841.9 | -0.2     |
| Mean medical charges          | 28,248.0 | 50,102.5 | -21,854.5 | -0.2     |
| Mean pharmacy charges         | 1,929.0  | 1,916.3  | 12.7      | 0.0      |
| Female                        | 62%      | 60%      | 2%        | -        |
| East                          | 16%      | 16%      | 0%        | -        |
| Midwest                       | 21%      | 20%      | 1%        | -        |
| South                         | 52%      | 52%      | -0%       | -        |
| West                          | 11%      | 12%      | -1%       | -        |
| Bone marrow biopsy            | 51%      | 45%      | 6%        | -        |
| Hospitalizations=0            | 74%      | 76%      | -2%       | -        |
| Hospitalizations=1            | 19%      | 19%      | -0%       | -        |
| Hospitalizations=2            | 4%       | 3%       | 1%        | -        |
| Hospitalizations=3+           | 3%       | 2%       | 1%        | -        |
| ED visits=0                   | 94%      | 94%      | 0%        | -        |
| ED visits=1                   | 3%       | 2%       | 1%        | -        |
| ED visits=2+                  | 3%       | 4%       | -2%       | -        |

# Study Rep 18

## Comparison of Table 1 Values for Study Rep 18

| Variable                      | Study    | Aet      | Diff      | Std Diff |
|-------------------------------|----------|----------|-----------|----------|
| Number of subjects            | 912      | 1,156    | -244      | -        |
| Age                           | 68.7     | 67.9     | 0.8       | 0.1      |
| Charlson comorbidity index    | 2.7      | 1.8      | 0.9       | -        |
| Physician office visits       | 10.5     | 11.3     | -0.8      | -0.1     |
| Hospitalizations LOS, days    | 9.0      | 2.4      | 6.6       | 0.5      |
| Mean total healthcare charges | 31,832.0 | 42,260.8 | -10,428.8 | -0.1     |
| Mean medical charges          | 29,581.0 | 39,916.7 | -10,335.7 | -0.1     |
| Mean pharmacy charges         | 2,251.0  | 2,344.1  | -93.1     | -0.0     |
| Female                        | 52%      | 51%      | 2%        | -        |
| East                          | 10%      | 10%      | 0%        | -        |
| Midwest                       | 22%      | 21%      | 1%        | -        |
| South                         | 51%      | 50%      | 1%        | -        |
| West                          | 17%      | 19%      | -2%       | -        |
| Bone marrow biopsy            | 45%      | 43%      | 3%        | -        |
| Hospitalizations=0            | 71%      | 72%      | -2%       | -        |
| Hospitalizations=1            | 19%      | 20%      | -1%       | -        |
| Hospitalizations=2            | 5%       | 6%       | -0%       | -        |
| Hospitalizations=3+           | 5%       | 2%       | 3%        | -        |
| ED visits=0                   | 95%      | 95%      | 0%        | -        |
| ED visits=1                   | 2%       | 2%       | -1%       | -        |
| ED visits=2+                  | 3%       | 3%       | 0%        | -        |

## Study Rep 19

### Comparison of Table 1 Values for Study Rep 19

| Variable        | Study | Aet  | Diff | Std Diff |
|-----------------|-------|------|------|----------|
| Age             | 67.4  | 63.6 | 3.8  | 0.3      |
| Male            | 59%   | 60%  | -1%  | -        |
| Age group 40-59 | 27%   | 36%  | -9%  | -        |
| Age group 60-64 | 12%   | 16%  | -4%  | -        |
| Age group 65-69 | 12%   | 10%  | 2%   | -        |
| Age group 70-74 | 13%   | 17%  | -3%  | -        |
| Age group 75+   | 36%   | 21%  | 15%  | -        |

## Study Rep 20

### Comparison of Table 1 Values for Study Rep 20

| Variable        | Study | Aet  | Diff | Std Diff |
|-----------------|-------|------|------|----------|
| Age             | 66.0  | 62.6 | 3.4  | 0.3      |
| Male            | 57%   | 58%  | -1%  | -        |
| Age group 40-59 | 34%   | 41%  | -7%  | -        |
| Age group 60-64 | 12%   | 16%  | -4%  | -        |
| Age group 65-69 | 10%   | 9%   | 1%   | -        |
| Age group 70-74 | 12%   | 12%  | -1%  | -        |

|               |     |     |     |   |
|---------------|-----|-----|-----|---|
| Age group 75+ | 32% | 21% | 10% | - |
|---------------|-----|-----|-----|---|

---



---



---



---

## Study Rep 21

---

### Comparison of Table 1 Values for Study Rep 21

| Variable        | Study | Aet  | Diff | Std Diff |
|-----------------|-------|------|------|----------|
| Age             | 69.3  | 65.2 | 4.1  | 0.4      |
| Male            | 60%   | 62%  | -3%  | -        |
| Age group 40-59 | 23%   | 29%  | -6%  | -        |
| Age group 60-64 | 12%   | 17%  | -4%  | -        |
| Age group 65-69 | 12%   | 11%  | 1%   | -        |
| Age group 70-74 | 14%   | 24%  | -10% | -        |
| Age group 75+   | 38%   | 19%  | 19%  | -        |

---



---



---



---

## Study Rep 22

---

### Comparison of Table 1 Values for Study Rep 22

| Variable           | Study  | Aet    | Diff   | Std Diff |
|--------------------|--------|--------|--------|----------|
| Number of subjects | 16,063 | 20,318 | -4,255 | -        |
| Age < 1            | 40%    | 30%    | 10%    | -        |

|                                            |            |             |      |   |
|--------------------------------------------|------------|-------------|------|---|
| Age 1 to <2                                | <b>12%</b> | <b>11%</b>  | 2%   | - |
| Age 2-4                                    | <b>17%</b> | -           | -    | - |
| Age 5-9                                    | <b>15%</b> | -           | -    | - |
| Age 10-18                                  | <b>16%</b> | -           | -    | - |
| Boy                                        | <b>57%</b> | <b>58%</b>  | -1%  | - |
| Died                                       | <b>1%</b>  | <b>2%</b>   | -1%  | - |
| LRTI hospitalizations = 0                  | <b>94%</b> | <b>100%</b> | -5%  | - |
| Underlying chronic medical conditions = 0  | <b>24%</b> | <b>51%</b>  | -27% | - |
| Underlying chronic medical conditions >= 1 | <b>76%</b> | <b>49%</b>  | 27%  | - |
| Underlying medical conditions = 1          | <b>38%</b> | <b>23%</b>  | 15%  | - |
| Underlying medical conditions = 2          | <b>21%</b> | <b>11%</b>  | 9%   | - |
| Underlying medical conditions >=3          | <b>17%</b> | <b>15%</b>  | 2%   | - |
| Asthma                                     | <b>20%</b> | <b>16%</b>  | 4%   | - |
| Other pulmonary diseases                   | <b>56%</b> | <b>18%</b>  | 38%  | - |
| Cardiac disease                            | <b>18%</b> | <b>12%</b>  | 6%   | - |
| Renal disease                              | <b>1%</b>  | <b>1%</b>   | 0%   | - |
| Hemoglobinopathies                         | <b>3%</b>  | <b>2%</b>   | 1%   | - |
| HIV/AIDS                                   | <b>0%</b>  | <b>0%</b>   | 0%   | - |
| Immunosuppression                          | <b>3%</b>  | <b>3%</b>   | 0%   | - |
| Malignancy                                 | <b>3%</b>  | <b>3%</b>   | -1%  | - |
| Diabetes                                   | <b>2%</b>  | <b>1%</b>   | 1%   | - |
| Other metabolic disorder                   | <b>2%</b>  | <b>3%</b>   | -0%  | - |
| Obesity                                    | <b>1%</b>  | <b>1%</b>   | 0%   | - |
| Liver disease                              | <b>0%</b>  | <b>1%</b>   | -0%  | - |
| Neurologic disorder                        | <b>16%</b> | <b>16%</b>  | -0%  | - |
| Cerebrovascular disease                    | <b>2%</b>  | <b>2%</b>   | 0%   | - |
| Pregnancy complications                    | <b>3%</b>  | <b>1%</b>   | 2%   | - |
| Prematurity                                | <b>3%</b>  | <b>18%</b>  | -16% | - |

|                           |    |    |     |   |
|---------------------------|----|----|-----|---|
| Other congenital disorder | 6% | 6% | -0% | - |
|---------------------------|----|----|-----|---|

---



---



---



---

## Study Rep 23

---

### Comparison of Table 1 Values for Study Rep 23

| Variable                           | Study   | Aet     | Diff    | Std Diff |
|------------------------------------|---------|---------|---------|----------|
| Number of subjects                 | 104,453 | 124,973 | -20,520 | -        |
| Age <1                             | 33%     | 20%     | 13%     | -        |
| Age 1 to <2                        | 17%     | 16%     | 1%      | -        |
| Age 2-4                            | 22%     | -       | -       | -        |
| Age 5-9                            | 16%     | -       | -       | -        |
| Age 10-18                          | 12%     | -       | -       | -        |
| Boy                                | 57%     | 56%     | 0%      | -        |
| Died                               | 0%      | 0%      | -0%     | -        |
| LRTI hospitalizations = 0          | 96%     | 100%    | -4%     | -        |
| Underlying medical conditions = 0  | 54%     | 59%     | -4%     | -        |
| Underlying medical conditions >= 1 | 46%     | 41%     | 4%      | -        |
| Underlying medical conditions = 1  | 30%     | 25%     | 5%      | -        |
| Underlying medical conditions = 2  | 10%     | 9%      | 0%      | -        |
| Underlying medical conditions >=3  | 6%      | 7%      | -1%     | -        |
| Asthma                             | 19%     | 18%     | 1%      | -        |
| Other pulmonary diseases           | 22%     | 3%      | 19%     | -        |
| Cardiac disease                    | 6%      | 5%      | 1%      | -        |
| Renal disease                      | 0%      | 0%      | 0%      | -        |

|                           |    |    |     |   |
|---------------------------|----|----|-----|---|
| Hemoglobinopathies        | 2% | 2% | -0% | - |
| HIV/AIDS                  | 0% | 0% | -0% | - |
| Immunosuppression         | 2% | 2% | 0%  | - |
| Malignancy                | 1% | 2% | -1% | - |
| Diabetes                  | 1% | 1% | 0%  | - |
| Other metabolic disorder  | 1% | 2% | -1% | - |
| Obesity                   | 0% | 1% | -0% | - |
| Liver disease             | 0% | 0% | -0% | - |
| Neurologic disorder       | 7% | 9% | -2% | - |
| Cerebrovascular disease   | 1% | 1% | -0% | - |
| Pregnancy complications   | 2% | 1% | 1%  | - |
| Prematurity               | 6% | 3% | 3%  | - |
| Other congenital disorder | 2% | 3% | -1% | - |

## Study Rep 24

### Comparison of Table 1 Values for Study Rep 24

| Variable                        | Study | Aet   | Diff   | Std Diff |
|---------------------------------|-------|-------|--------|----------|
| Number of subjects              | 1,325 | 6,716 | -5,391 | -        |
| Continuous enrollment mean (SD) | 44.8  | -     | -      | -        |
| Male                            | 59%   | 71%   | -12%   | -        |
| Female                          | 41%   | 29%   | 12%    | -        |
| Age <18                         | -     | 0%    | -      | -        |
| Age 18-34                       | -     | 3%    | -      | -        |

|                                        |             |            |      |   |
|----------------------------------------|-------------|------------|------|---|
| Age 35-49                              | -           | <b>15%</b> | -    | - |
| Age 50-64                              | -           | <b>58%</b> | -    | - |
| Age 65-80                              | <b>94%</b>  | <b>22%</b> | 72%  | - |
| Age >80                                | <b>6%</b>   | <b>2%</b>  | 4%   | - |
| Commercial care                        | -           | <b>76%</b> | -    | - |
| Medicare                               | <b>100%</b> | <b>24%</b> | 76%  | - |
| Northeast                              | <b>6%</b>   | <b>17%</b> | -11% | - |
| North Central                          | <b>37%</b>  | <b>28%</b> | 9%   | - |
| South                                  | <b>33%</b>  | <b>34%</b> | -1%  | - |
| West                                   | <b>23%</b>  | <b>18%</b> | 5%   | - |
| Unknown Region                         | <b>0%</b>   | <b>3%</b>  | -3%  | - |
| Any pharmaceutical info available      | <b>99%</b>  | -          | -    | - |
| Any pharmaceutical info not available  | <b>1%</b>   | -          | -    | - |
| Procedure year 2005                    | <b>11%</b>  | -          | -    | - |
| Procedure year 2006                    | <b>21%</b>  | -          | -    | - |
| Procedure year 2007                    | <b>27%</b>  | -          | -    | - |
| Procedure year 2008                    | <b>32%</b>  | -          | -    | - |
| Procedure year 2009                    | <b>9%</b>   | -          | -    | - |
| Length of stay = 0                     | <b>40%</b>  | <b>0%</b>  | 40%  | - |
| Length of stay =1                      | <b>38%</b>  | -          | -    | - |
| Length of stay =2-4                    | <b>15%</b>  | -          | -    | - |
| Length of stay =5-9                    | <b>5%</b>   | -          | -    | - |
| Length of stay =10-19                  | <b>1%</b>   | -          | -    | - |
| Length of stay =20+                    | <b>0%</b>   | <b>0%</b>  | 0%   | - |
| Inpatient                              | <b>60%</b>  | <b>58%</b> | 2%   | - |
| Outpatient                             | <b>40%</b>  | <b>58%</b> | -18% | - |
| Ischemic with myocardial infarction    | <b>5%</b>   | <b>6%</b>  | -1%  | - |
| Ischemic without myocardial infarction | <b>54%</b>  | <b>33%</b> | 21%  | - |



|                                                  |     |     |     |   |
|--------------------------------------------------|-----|-----|-----|---|
| Heart failure                                    | 25% | 17% | 8%  | - |
| Cardiomyopathy                                   | 11% | 14% | -3% | - |
| Hypertensive heart disease without heart failure | 9%  | 6%  | 3%  | - |
| Valvular heart disease                           | 41% | 30% | 11% | - |
| Conduction system disease                        | 10% | 13% | -3% | - |
| Congenital heart disease                         | 4%  | 4%  | -0% | - |
| Hypertension                                     | 68% | 59% | 9%  | - |
| Diabetes                                         | 21% | 17% | 4%  | - |
| COPD                                             | 18% | 9%  | 9%  | - |
| Acute renal failure                              | 3%  | -   | -   | - |

## Comparison of Health Results for Study Rep 24 (RS21)

### Basic Parameters

| Outcome                        | Parameter               | Study Exp | Action Exp | Study Ref | Action Ref |
|--------------------------------|-------------------------|-----------|------------|-----------|------------|
| Acute safety composite outcome | Number of outcomes      | 564       | 236        | 161       | 677        |
| Acute safety composite outcome | Number of patients      | 4,622     | 1,666      | 1,325     | 5,050      |
| Acute safety composite outcome | Number of person-years  | -         | 28         | -         | 86         |
| Acute safety composite outcome | Risk per 1000           | 122.03    | 141.66     | 121.51    | 134.06     |
| Acute safety composite outcome | Incidence rate per 1000 | -         | 8,380.19   | -         | 7,829.81   |

### Treatment Effect Estimates

| Outcome                        | Parameter           | Study Value | Study CI     | Action Value | Action CI    |
|--------------------------------|---------------------|-------------|--------------|--------------|--------------|
| Acute safety composite outcome | Unadjusted estimate | 1.00        | (0.96, 1.04) | 1.07         | (0.91, 1.23) |
| Acute safety composite outcome | Adjusted estimate   | 1.05        | (0.85, 1.29) | -            | (-, -)       |

# Study Rep 25

## Comparison of Table 1 Values for Study Rep 25

| Variable                                   | Study   | Aet     | Diff    | Std Diff |
|--------------------------------------------|---------|---------|---------|----------|
| Number of subjects                         | 105,682 | 179,028 | -73,346 | -        |
| Age, mean (SD)                             | 59.2    | 58.4    | 0.8     | 0.1      |
| Quan-Charlson Comorbidity index, Mean (SD) | 1.3     | 1.3     | 0.0     | 0.0      |
| DVT only                                   | 59%     | -       | -       | -        |
| PE with or without DVT                     | 41%     | 38%     | 3%      | -        |
| Cancer at baseline                         | 17%     | 19%     | -2%     | -        |
| Provoked VTE                               | 28%     | 33%     | -5%     | -        |
| Unprovoked VTE                             | 55%     | 48%     | 7%      | -        |
| Female                                     | 49%     | 50%     | -0%     | -        |
| Northeast                                  | 15%     | 17%     | -2%     | -        |
| Midwest                                    | 33%     | 31%     | 2%      | -        |
| South                                      | 34%     | 33%     | 0%      | -        |
| West                                       | 17%     | 17%     | -0%     | -        |
| Unknown Region                             | 1%      | 1%      | -0%     | -        |
| PPO                                        | 53%     | 54%     | -1%     | -        |
| Comprehensive                              | 15%     | 15%     | 0%      | -        |
| HMO                                        | 14%     | 14%     | 1%      | -        |
| POS                                        | 6%      | 6%      | 0%      | -        |
| CDHP                                       | 3%      | 3%      | 0%      | -        |
| EPO                                        | 1%      | 1%      | 0%      | -        |
| POS capitated                              | 0%      | 0%      | 0%      | -        |
| Other Insurance                            | 6%      | 7%      | -1%     | -        |

|                                       |     |     |      |   |
|---------------------------------------|-----|-----|------|---|
| Quan-Charlson Comorbidity index=0     | 52% | 50% | 2%   | - |
| Quan-Charlson Comorbidity index=1     | 18% | 19% | -1%  | - |
| Quan-Charlson Comorbidity index=2     | 12% | 13% | -1%  | - |
| Quan-Charlson Comorbidity index.=3    | 18% | 18% | -0%  | - |
| Use of anticoagulant at baseline      | 12% | 34% | -22% | - |
| 2007 Index                            | 8%  | -   | -    | - |
| 2008 Index                            | 18% | 10% | 8%   | - |
| 2009 Index                            | 21% | 20% | 1%   | - |
| 2010 Index                            | 21% | 19% | 2%   | - |
| 2011 Index                            | 23% | 22% | 2%   | - |
| 2012 Index                            | 10% | 21% | -12% | - |
| Major surgery                         | 73% | -   | -    | - |
| Age >60 years                         | 49% | 43% | 6%   | - |
| Hypertension                          | 37% | 40% | -3%  | - |
| Hyperlipidemia                        | 24% | 26% | -3%  | - |
| Multiple trauma                       | 23% | 32% | -9%  | - |
| Malignant cancer                      | 17% | 19% | -2%  | - |
| Diabetes                              | 16% | 17% | -1%  | - |
| Other serious infection               | 14% | -   | -    | - |
| Chronic obstructive pulmonary disease | 9%  | 10% | -1%  | - |
| Pneumonia                             | 7%  | 7%  | -0%  | - |
| Contraceptive pill (use of oral)      | 6%  | 3%  | 2%   | - |
| Obesity                               | 5%  | 7%  | -2%  | - |
| Hip, pelvis, or leg fracture          | 5%  | 3%  | 2%   | - |
| Tobacco                               | 4%  | 5%  | -1%  | - |
| Central venous catheter               | 4%  | 6%  | -2%  | - |
| Total knee replacement                | 2%  | 2%  | -0%  | - |
| Varicose veins                        | 2%  | 3%  | -1%  | - |

|                                                  |    |    |     |   |
|--------------------------------------------------|----|----|-----|---|
| Treatment with erythropoiesis stimulating agents | 2% | 0% | 1%  | - |
| Rheumatoid arthritis                             | 2% | 2% | -0% | - |
| Coagulation defect                               | 2% | 4% | -2% | - |
| Inflammatory bowel disease                       | 1% | 1% | -0% | - |
| Surgical resection of abdominal or pelvic cancer | 1% | -  | -   | - |
| Pregnancy                                        | 1% | 1% | -0% | - |
| Thrombophilia                                    | 1% | 2% | -1% | - |
| Total hip replacement                            | 1% | 1% | 0%  | - |
| Treatment with SERMs                             | 1% | 1% | 0%  | - |
| Spinal cord injury                               | 0% | 1% | -1% | - |
| Treatment with aromatase inhibitors              | 0% | 1% | -1% | - |
| Immobility                                       | 0% | 0% | 0%  | - |
| Abdominal surgery                                | 0% | 3% | -3% | - |

## Study Rep 26

### Comparison of Table 1 Values for Study Rep 26

| Variable                                                 | Study |         |          |          | Ref   |         |          | Diff of Diff |
|----------------------------------------------------------|-------|---------|----------|----------|-------|---------|----------|--------------|
|                                                          | Exp   | Aet Exp | Exp Diff | Std Diff | Ref   | Aet Ref | Ref Diff |              |
| Number of subjects                                       | 744   | 1,357   | -613     | -        | 1,851 | 3,012   | -1,161   | - 548        |
| Age, mean (SD)                                           | 43.7  | 46.3    | -2.6     | -0.2     | 43.2  | 41.4    | 1.8      | 0.1 -4.4     |
| Comorbidity Deyo-Charlson Comorbidity Index              | 0.3   | 0.8     | -0.5     | -0.4     | 0.7   | 0.4     | 0.3      | 0.2 -0.7     |
| Comorbidity Unique 3-digit ICD-9-CM diagnoses, mean (SD) | 6.0   | -       | -        | -        | 7.7   | -       | -        | - -          |

|                                                      |            |            |      |   |            |            |      |   |             |
|------------------------------------------------------|------------|------------|------|---|------------|------------|------|---|-------------|
| Comorbidity Unique outpatient medications, mean (SD) | <b>6.7</b> | -          | -    | - | <b>7.1</b> | -          | -    | - | -           |
| age 18-24                                            | <b>8%</b>  | <b>9%</b>  | -2%  | - | <b>13%</b> | <b>17%</b> | -4%  | - | <b>3%</b>   |
| age 25-34                                            | <b>14%</b> | <b>12%</b> | 2%   | - | <b>18%</b> | <b>17%</b> | 1%   | - | <b>1%</b>   |
| age 35-44                                            | <b>21%</b> | <b>16%</b> | 5%   | - | <b>23%</b> | <b>19%</b> | 3%   | - | <b>1%</b>   |
| age 45-54                                            | <b>31%</b> | <b>29%</b> | 2%   | - | <b>27%</b> | <b>25%</b> | 2%   | - | <b>-1%</b>  |
| age 55-65                                            | <b>26%</b> | <b>33%</b> | -6%  | - | <b>19%</b> | <b>22%</b> | -3%  | - | <b>-4%</b>  |
| Male                                                 | <b>32%</b> | <b>33%</b> | -1%  | - | <b>41%</b> | <b>44%</b> | -3%  | - | <b>3%</b>   |
| Female                                               | <b>68%</b> | <b>67%</b> | 1%   | - | <b>59%</b> | <b>56%</b> | 3%   | - | <b>-3%</b>  |
| Northeast                                            | <b>8%</b>  | <b>14%</b> | -6%  | - | <b>12%</b> | <b>15%</b> | -3%  | - | <b>-3%</b>  |
| North Central                                        | <b>26%</b> | <b>28%</b> | -2%  | - | <b>32%</b> | <b>31%</b> | 1%   | - | <b>-3%</b>  |
| South                                                | <b>47%</b> | <b>40%</b> | 7%   | - | <b>39%</b> | <b>34%</b> | 6%   | - | <b>2%</b>   |
| West                                                 | <b>17%</b> | <b>16%</b> | 1%   | - | <b>16%</b> | <b>18%</b> | -2%  | - | <b>4%</b>   |
| Unknown Region                                       | <b>2%</b>  | <b>2%</b>  | -0%  | - | <b>1%</b>  | <b>2%</b>  | -1%  | - | <b>0%</b>   |
| Comprehensive Insurance                              | <b>14%</b> | <b>8%</b>  | 6%   | - | <b>12%</b> | <b>6%</b>  | 6%   | - | <b>-0%</b>  |
| HMO                                                  | <b>14%</b> | <b>13%</b> | 1%   | - | <b>18%</b> | <b>15%</b> | 3%   | - | <b>-2%</b>  |
| POS                                                  | <b>9%</b>  | <b>9%</b>  | -0%  | - | <b>11%</b> | <b>9%</b>  | 2%   | - | <b>-2%</b>  |
| POS with capitation                                  | <b>59%</b> | <b>64%</b> | -6%  | - | <b>53%</b> | <b>64%</b> | -11% | - | <b>5%</b>   |
| Other Insurance                                      | <b>4%</b>  | <b>5%</b>  | -2%  | - | <b>5%</b>  | <b>6%</b>  | -1%  | - | <b>-1%</b>  |
| Depression                                           | <b>52%</b> | <b>56%</b> | -4%  | - | <b>29%</b> | <b>29%</b> | -0%  | - | <b>-3%</b>  |
| Hyperlipidemia                                       | <b>10%</b> | <b>6%</b>  | 4%   | - | <b>7%</b>  | <b>5%</b>  | 2%   | - | <b>2%</b>   |
| Anxiety/panic disorders                              | <b>14%</b> | <b>14%</b> | 0%   | - | <b>7%</b>  | <b>6%</b>  | 0%   | - | <b>-0%</b>  |
| Renal disease                                        | <b>4%</b>  | <b>3%</b>  | 1%   | - | <b>3%</b>  | <b>1%</b>  | 1%   | - | <b>-0%</b>  |
| Fibromyalgia                                         | <b>9%</b>  | <b>10%</b> | -1%  | - | <b>2%</b>  | <b>2%</b>  | -0%  | - | <b>-1%</b>  |
| Antidepressants                                      | <b>48%</b> | <b>52%</b> | -4%  | - | <b>24%</b> | <b>27%</b> | -3%  | - | <b>-1%</b>  |
| Anxiolytics                                          | <b>52%</b> | <b>62%</b> | -10% | - | <b>23%</b> | <b>22%</b> | 1%   | - | <b>-11%</b> |
| Antihypertensives                                    | <b>22%</b> | -          | -    | - | <b>12%</b> | -          | -    | - | <b>-</b>    |
| Statins                                              | <b>19%</b> | <b>24%</b> | -5%  | - | <b>11%</b> | <b>15%</b> | -4%  | - | <b>-1%</b>  |

|                     |     |    |    |   |    |    |    |   |     |
|---------------------|-----|----|----|---|----|----|----|---|-----|
| Bone density agents | 6%  | 6% | 0% | - | 4% | 4% | 0% | - | -0% |
| Antidiabetics       | 10% | 5% | 4% | - | 5% | 2% | 3% | - | 2%  |

## Comparison of Health Results for Study Rep 26 (RS23)

### Basic Parameters

| Outcome             | Parameter               | Study Exp | Action Exp | Study Ref | Action Ref |
|---------------------|-------------------------|-----------|------------|-----------|------------|
| Any inpatient visit | Number of outcomes      | 413       | 373        | 827       | 499        |
| Any inpatient visit | Number of patients      | 744       | 1,357      | 1,851     | 3,012      |
| Any inpatient visit | Number of person-years  | -         | 1,139      | -         | 2,722      |
| Any inpatient visit | Risk per 1000           | 555.11    | 274.87     | 446.79    | 165.67     |
| Any inpatient visit | Incidence rate per 1000 | -         | 327.33     | -         | 183.29     |

### Treatment Effect Estimates

| Outcome             | Parameter           | Study Value | Study CI     | Action Value | Action CI    |
|---------------------|---------------------|-------------|--------------|--------------|--------------|
| Any inpatient visit | Unadjusted estimate | 1.36        | (1.21, 1.54) | 1.91         | (1.76, 2.06) |
| Any inpatient visit | Adjusted estimate   | -           | (-, -)       | 1.28         | (1.10, 1.46) |

## Study Rep 27

### Comparison of Table 1 Values for Study Rep 27

| Variable           | Study | Aet   | Diff | Std Diff |
|--------------------|-------|-------|------|----------|
| Number of subjects | 1,240 | 1,165 | 75   | -        |
| Age                | 45.9  | 43.8  | 2.1  | 0.1      |
| Doxorubicin        | 0%    | 0%    | 0%   | -        |

|                  |     |     |     |   |
|------------------|-----|-----|-----|---|
| Dexamethasone    | 12% | 10% | 3%  | - |
| Prednisone       | 14% | 23% | -9% | - |
| Rituximab        | 0%  | 0%  | 0%  | - |
| Thalidomide      | 0%  | 0%  | 0%  | - |
| Cyclophosphamide | 0%  | 0%  | 0%  | - |
| Tocilizumab      | 0%  | 0%  | 0%  | - |
| Male             | 38% | 35% | 3%  | - |
| Female           | 62% | 65% | -3% | - |
| Age < 40         | 32% | 36% | -4% | - |
| Age 40-64        | 58% | 55% | 3%  | - |
| Age >=65         | 10% | 9%  | 1%  | - |
| Cancer           | 4%  | 5%  | -1% | - |
| Lupus            | 1%  | 1%  | -0% | - |
| RA               | 0%  | 1%  | -0% | - |
| HIV              | 0%  | 0%  | 0%  | - |
| Herpes (HHV-8)   | 0%  | 0%  | 0%  | - |
| Kaposi sarcoma   | 0%  | 0%  | 0%  | - |

## Study Rep 28

### Comparison of Table 1 Values for Study Rep 28

| Variable                        | Study | Aet  | Diff | Std Diff |
|---------------------------------|-------|------|------|----------|
| Age Mean (SD), Median (Males)   | 49.0  | 44.2 | 4.8  | 0.3      |
| Age Mean (SD), Median (Females) | 49.8  | 44.2 | 5.6  | 0.4      |

|                                            |            |            |     |   |
|--------------------------------------------|------------|------------|-----|---|
| Number of subjects (% of CD parent cohort) | <b>23%</b> | -          | -   | - |
| Male                                       | <b>33%</b> | <b>29%</b> | 5%  | - |
| Female                                     | <b>67%</b> | <b>71%</b> | -5% | - |

## Study Rep 29

### Comparison of Table 1 Values for Study Rep 29

| Variable                                                                           | Study | Aet    | Diff   | Std Diff |
|------------------------------------------------------------------------------------|-------|--------|--------|----------|
| Number of subjects                                                                 | 7,971 | 16,745 | -8,774 | -        |
| Age (meanSD)                                                                       | 67.8  | 69.4   | -1.6   | -0.1     |
| Warfarin daily dose (meanSD)                                                       | 2.8   | -      | -      | -        |
| CHADS2 score (meanSD)                                                              | 1.6   | 1.8    | -0.2   | -0.1     |
| age 18-<65                                                                         | 41%   | 36%    | 5%     | -        |
| age 65-<75                                                                         | 25%   | 25%    | -0%    | -        |
| age 75-585                                                                         | 26%   | 30%    | -3%    | -        |
| Age 85+                                                                            | 8%    | 9%     | -1%    | -        |
| Male                                                                               | 59%   | 60%    | -1%    | -        |
| Female                                                                             | 41%   | 40%    | 1%     | -        |
| Bleeding                                                                           | 7%    | 4%     | 4%     | -        |
| Potentiating concomitant medications influencing efficacy of warfarin              | 47%   | -      | -      | -        |
| Inhibiting concomitant medications influencing efficacy of warfarin                | 7%    | -      | -      | -        |
| Potentiating & inhibiting concomitant medications influencing efficacy of warfarin | 23%   | -      | -      | -        |
| Warfarin <=5 mg/day                                                                | 90%   | 96%    | -6%    | -        |



|                                      |     |     |      |   |
|--------------------------------------|-----|-----|------|---|
| Warfarin 5-7 mg/day                  | 8%  | 1%  | 7%   | - |
| Warfarin >7 mg/day                   | 2%  | 4%  | -2%  | - |
| Proton pump inhibitors               | 21% | 20% | 1%   | - |
| H2 antagonists                       | 3%  | 3%  | -0%  | - |
| Prostaglandin E1 analogs/protectants | 0%  | 5%  | -5%  | - |
| CHADS2=0                             | 21% | 17% | 4%   | - |
| CHADS2=1                             | 32% | 31% | 2%   | - |
| CHADS2=2-3                           | 37% | 28% | 9%   | - |
| CHADS2=4                             | 10% | 11% | -1%  | - |
| Stroke                               | 16% | 14% | 1%   | - |
| Cardiovascular disease               | 44% | 42% | 2%   | - |
| Hypertension                         | 51% | 61% | -10% | - |
| Anemia                               | 8%  | 9%  | -1%  | - |
| Diabetes                             | 22% | 25% | -3%  | - |
| GI disorders                         | 19% | 24% | -4%  | - |

## Study Rep 30

### Comparison of Table 1 Values for Study Rep 30

| Variable                     | Study | Aet    | Diff | Std Diff |
|------------------------------|-------|--------|------|----------|
| Number of subjects           | -     | 16,745 | -    | -        |
| Age (meanSD)                 | 67.7  | 69.4   | -1.7 | -0.1     |
| Warfarin daily dose (meanSD) | 2.3   | -      | -    | -        |

|                                                                                    |            |            |             |             |
|------------------------------------------------------------------------------------|------------|------------|-------------|-------------|
| CHADS2 score (meanSD)                                                              | <b>1.6</b> | <b>1.8</b> | <b>-0.2</b> | <b>-0.1</b> |
| age 18-<65                                                                         | <b>40%</b> | -          | -           | -           |
| age 65-<75                                                                         | <b>25%</b> | -          | -           | -           |
| age 75-585                                                                         | <b>26%</b> | -          | -           | -           |
| Age 85+                                                                            | <b>9%</b>  | -          | -           | -           |
| Male                                                                               | <b>60%</b> | -          | -           | -           |
| Female                                                                             | <b>40%</b> | -          | -           | -           |
| Bleeding                                                                           | <b>8%</b>  | <b>4%</b>  | <b>4%</b>   | -           |
| Potentiating concomitant medications influencing efficacy of warfarin              | <b>46%</b> | -          | -           | -           |
| Inhibiting concomitant medications influencing efficacy of warfarin                | <b>7%</b>  | -          | -           | -           |
| Potentiating & inhibiting concomitant medications influencing efficacy of warfarin | <b>21%</b> | -          | -           | -           |
| Warfarin <=5 mg/day                                                                | <b>97%</b> | <b>96%</b> | <b>1%</b>   | -           |
| Warfarin 5-7 mg/day                                                                | <b>2%</b>  | <b>1%</b>  | <b>1%</b>   | -           |
| Warfarin >7 mg/day                                                                 | <b>0%</b>  | <b>4%</b>  | <b>-3%</b>  | -           |
| Proton pump inhibitors                                                             | <b>19%</b> | <b>20%</b> | <b>-1%</b>  | -           |
| H2 antagonists                                                                     | <b>3%</b>  | <b>3%</b>  | <b>-0%</b>  | -           |
| Prostaglandin E1 analogs/protectants                                               | <b>50%</b> | <b>5%</b>  | <b>45%</b>  | -           |
| CHADS2=0                                                                           | <b>22%</b> | <b>17%</b> | <b>5%</b>   | -           |
| CHADS2=1                                                                           | <b>32%</b> | <b>31%</b> | <b>2%</b>   | -           |
| CHADS2=2-3                                                                         | <b>36%</b> | <b>28%</b> | <b>8%</b>   | -           |
| CHADS2=4                                                                           | <b>9%</b>  | <b>11%</b> | <b>-2%</b>  | -           |
| Stroke                                                                             | <b>15%</b> | <b>14%</b> | <b>0%</b>   | -           |
| Cardiovascular disease                                                             | <b>46%</b> | <b>42%</b> | <b>4%</b>   | -           |
| Hypertension                                                                       | <b>50%</b> | <b>61%</b> | <b>-11%</b> | -           |
| Anemia                                                                             | <b>9%</b>  | <b>9%</b>  | <b>-0%</b>  | -           |
| Diabetes                                                                           | <b>21%</b> | <b>25%</b> | <b>-5%</b>  | -           |
| GI disorders                                                                       | <b>20%</b> | <b>24%</b> | <b>-4%</b>  | -           |

# Study Rep 31

## Comparison of Table 1 Values for Study Rep 31

| Variable                     | Study<br>Exp | Aet<br>Exp | Exp<br>Diff | Exp Std<br>Diff | Study<br>Ref | Aet Ref | Ref<br>Diff | Ref<br>Std<br>Diff | Diff of<br>Diff |
|------------------------------|--------------|------------|-------------|-----------------|--------------|---------|-------------|--------------------|-----------------|
| Number of subjects           | 67,901       | 74,049     | -6,148      | -               | 115,491      | 118,186 | -2,695      | -                  | -3,453          |
| Age: mean (sd)               | 58.0         | 57.4       | 0.6         | 0.0             | 61.0         | 60.0    | 1.0         | 0.0                | -0.4            |
| BMI: mean (sd)               | 26.0         | 26.0       | 0.0         | 0.0             | 26.0         | 25.9    | 0.1         | 0.0                | -0.1            |
| Prevalent users              | 40%          | 40%        | 0%          | -               | 35%          | 37%     | -2%         | -                  | 3%              |
| Female                       | 56%          | 56%        | -0%         | -               | 60%          | 61%     | -1%         | -                  | 1%              |
| Male                         | 44%          | 44%        | 0%          | -               | 40%          | 39%     | 1%          | -                  | -1%             |
| Age 18-29                    | 14%          | 14%        | -0%         | -               | 8%           | 9%      | -1%         | -                  | 1%              |
| Age 30-39                    | 14%          | 15%        | -1%         | -               | 12%          | 13%     | -1%         | -                  | 1%              |
| Age 40-49                    | 14%          | 14%        | -0%         | -               | 13%          | 14%     | -1%         | -                  | 1%              |
| Age 50-59                    | 10%          | 10%        | -0%         | -               | 13%          | 13%     | 0%          | -                  | -0%             |
| Age 60-69                    | 8%           | 8%         | -0%         | -               | 12%          | 11%     | 1%          | -                  | -1%             |
| Age 70-79                    | 14%          | 14%        | -0%         | -               | 16%          | 15%     | 1%          | -                  | -1%             |
| Age 80+                      | 27%          | 25%        | 2%          | -               | 26%          | 25%     | 1%          | -                  | 0%              |
| Nonsmoker                    | 38%          | 41%        | -3%         | -               | 38%          | 40%     | -2%         | -                  | -1%             |
| Ex-smoker                    | 18%          | 14%        | 3%          | -               | 15%          | 12%     | 3%          | -                  | -0%             |
| Smoker                       | 30%          | 30%        | 1%          | -               | 27%          | 27%     | 0%          | -                  | 1%              |
| Unknown smoking status       | 14%          | -          | -           | -               | 19%          | -       | -           | -                  | -               |
| Schizophrenia                | 13%          | 14%        | -1%         | -               | 6%           | 7%      | -1%         | -                  | 0%              |
| Bipolar/other mood disorders | 6%           | 7%         | -1%         | -               | 3%           | 3%      | -1%         | -                  | -0%             |

|                                            |     |     |     |   |     |     |     |   |     |
|--------------------------------------------|-----|-----|-----|---|-----|-----|-----|---|-----|
| Major depression                           | 12% | 14% | -2% | - | 10% | 11% | -1% | - | -1% |
| Dementia                                   | 18% | 17% | 2%  | - | 11% | 10% | 1%  | - | 1%  |
| No recorded specific psychiatric disorders | 50% | 53% | -3% | - | 70% | 71% | -1% | - | -2% |
| History of alcoholism or drug abuse        | 12% | 11% | 1%  | - | 10% | 9%  | 1%  | - | 0%  |
| History of suicide attempts                | 7%  | 8%  | -0% | - | 5%  | 5%  | -0% | - | 0%  |
| Diabetes mellitus                          | 8%  | 9%  | -1% | - | 8%  | 8%  | 0%  | - | -1% |
| Acute MI                                   | 3%  | 3%  | 0%  | - | 4%  | 3%  | 0%  | - | -0% |
| statins/fibrates in the 3 mos prior        | 12% | 12% | -0% | - | 7%  | 7%  | 0%  | - | -0% |
| Antiplatelets                              | 20% | 20% | -0% | - | 16% | 17% | -0% | - | 0%  |
| Antidepressants                            | 50% | 52% | -1% | - | 43% | 45% | -2% | - | 1%  |
| Anxiolytics                                | 17% | 17% | -0% | - | 14% | 14% | -0% | - | 0%  |
| SSRIs                                      | 30% | 31% | -1% | - | 21% | 23% | -2% | - | 0%  |
| Lithium                                    | 3%  | 4%  | -0% | - | 2%  | 3%  | -0% | - | 0%  |
| Antiepileptics                             | 6%  | 6%  | -0% | - | 5%  | 5%  | -0% | - | -0% |

## Comparison of Health Results for Study Rep 31 (RS27)

### Basic Parameters

| Outcome | Parameter               | Study Exp | Aetion Exp | Study Ref | Aetion Ref |
|---------|-------------------------|-----------|------------|-----------|------------|
| Death   | Number of outcomes      | 7,555     | 5,411      | 15,334    | 9,614      |
| Death   | Number of patients      | 67,901    | 74,049     | 115,491   | 118,186    |
| Death   | Number of person-years  | 99,407    | 58,983     | 167,584   | 71,460     |
| Death   | Risk per 1000           | 111.26    | 73.07      | 132.77    | 81.35      |
| Death   | Incidence rate per 1000 | 76.00     | 91.74      | 91.50     | 134.54     |

### Treatment Effect Estimates

| Outcome | Parameter           | Study Value | Study CI     | Action Value | Action CI    |
|---------|---------------------|-------------|--------------|--------------|--------------|
| Death   | Unadjusted estimate | 0.83        | (0.81, 0.85) | 0.68         | (0.65, 0.72) |
| Death   | Adjusted estimate   | 0.83        | (0.80, 0.85) | 0.71         | (0.67, 0.74) |

## Study Rep 32

### Comparison of Table 1 Values for Study Rep 32

| Variable                                                                  | Study | Aet     | Diff     | Std Diff |
|---------------------------------------------------------------------------|-------|---------|----------|----------|
| Number of subjects                                                        | 1,026 | 127,749 | -126,723 | -        |
| Average HbA1c level during the 1-year study period, mean, in % NGSP units | 7.3   | -       | -        | -        |
| Age, Mean (SD)                                                            | 55.3  | 57.2    | -1.9     | -0.2     |
| No. of different hypoglycemic drug classes, Mean (SD)                     | 3.0   | 2.4     | 0.6      | 0.5      |
| Average HbA1c mmol/mol IFCC units, Mean (SD)                              | 56.0  | -       | -        | -        |
| Percentage of time within glycemic goal (i.e., HbA1c <7%), Mean (SD)      | 49.7  | -       | -        | -        |
| Charlson comorbidity index (without diabetes), Mean (SD)                  | 1.3   | 1.0     | 0.3      | 0.2      |
| Treatment gaps ?90 consecutive days                                       | 11%   | -       | -        | -        |
| Proportion of days of use during the period                               | 20%   | -       | -        | -        |
| Used hypoglycemic agents for more than 80% of the period                  | 75%   | -       | -        | -        |
| Female                                                                    | 47%   | 48%     | -1%      | -        |
| Region, Northeast                                                         | 13%   | 13%     | -1%      | -        |
| Region, North Central                                                     | 23%   | 27%     | -4%      | -        |
| Region, South                                                             | 54%   | 45%     | 8%       | -        |
| Region, West                                                              | 11%   | 12%     | -1%      | -        |

|                                                                                           |     |     |      |   |
|-------------------------------------------------------------------------------------------|-----|-----|------|---|
| Insurance plan type, Comprehensive Insurance                                              | 6%  | 7%  | -1%  | - |
| Insurance plan type, Non-Capitated Point-of-Service (POS)                                 | 20% | 10% | 9%   | - |
| Insurance plan type, Preferred Provider Organization (PPO)                                | 69% | 77% | -7%  | - |
| Insurance plan type, Consumer-Driven Health Plan (CDHP)                                   | 4%  | 4%  | -1%  | - |
| Insurance plan type, High Deductible Health Plan (HDHP)                                   | 1%  | 2%  | -1%  | - |
| Alpha-Glucosidase Inhibitors                                                              | 1%  | 1%  | 0%   | - |
| Hypoglycemic Agents - Amylin Analogs                                                      | 1%  | 2%  | -1%  | - |
| Hypoglycemic Agent Combinations                                                           | 22% | 20% | 2%   | - |
| Biguanide Sensitizers                                                                     | 66% | 67% | -0%  | - |
| Dipeptidyl Peptidase-4 (DPP-4) Inhibitors                                                 | 19% | 23% | -4%  | - |
| Human Insulin                                                                             | 41% | 38% | 3%   | - |
| Incretin Mimetic Agents (GLP-1 Receptor Agonists)                                         | 17% | 18% | -2%  | - |
| Meglitinide Analogues                                                                     | 2%  | 4%  | -2%  | - |
| Sulfonylureas                                                                             | 43% | 43% | 0%   | - |
| Thiazolidinediones (TZDs)                                                                 | 31% | 29% | 2%   | - |
| Other hypoglycemic agents                                                                 | 4%  | 0%  | 4%   | - |
| >=2 different hypoglycemic drug classes                                                   | 88% | 73% | 15%  | - |
| >=3 different hypoglycemic drug classes                                                   | 62% | 37% | 24%  | - |
| Use of bile acid sequestrants                                                             | 3%  | 3%  | -0%  | - |
| Within glycemic goal (i.e., HbA1c level <7% NGSP [ $<53$ mmol/mol IFFC] at the index date | 47% | -   | -    | - |
| Diabetic retinopathy                                                                      | 16% | 9%  | 7%   | - |
| Nephropathy                                                                               | 17% | 8%  | 9%   | - |
| Neuropathy                                                                                | 23% | 18% | 5%   | - |
| Atherosclerosis, aneurysm, or embolism                                                    | 7%  | 27% | -20% | - |
| Peripheral vascular conditions                                                            | 15% | 6%  | 9%   | - |
| Cerebrovascular disease                                                                   | 11% | 8%  | 3%   | - |
| Coronary artery disease                                                                   | 30% | 23% | 6%   | - |
| Infections                                                                                | 24% | 29% | -6%  | - |

|                                           |     |     |      |   |
|-------------------------------------------|-----|-----|------|---|
| Other ocular complications                | 24% | 14% | 10%  | - |
| Ulceration or diabetic bone changes       | 5%  | 8%  | -4%  | - |
| Ketoacidosis or hyperosmolarity           | 1%  | 1%  | -0%  | - |
| Hypoglycemia                              | 7%  | 2%  | 5%   | - |
| Diabetic coma                             | 1%  | 0%  | 1%   | - |
| Unspecified diabetes-related complication | 8%  | -   | -    | - |
| IP admission related to a complication    | 20% | -   | -    | - |
| ER visit related to a complication        | 5%  | -   | -    | - |
| Patients seen by an endocrinologist       | 19% | -   | -    | - |
| Hypertension and associated conditions    | 66% | 76% | -10% | - |
| Lipid disorders                           | 70% | 73% | -3%  | - |
| Congestive heart failure                  | 8%  | 7%  | 1%   | - |
| Overweight, obesity                       | 11% | 17% | -6%  | - |
| Mental disorder                           | 11% | 3%  | 9%   | - |
| Other genitourinary system disorder       | 24% | 22% | 2%   | - |
| AIDS                                      | 1%  | 0%  | 1%   | - |
| Anemia                                    | 18% | 18% | 0%   | - |
| Chronic pulmonary disease                 | 15% | 10% | 5%   | - |
| Coagulopathy                              | 4%  | 2%  | 1%   | - |
| Fluid electrolyte disorders               | 10% | 10% | -0%  | - |
| Hypothyroidism                            | 18% | 17% | 1%   | - |
| Liver disease                             | 7%  | 6%  | 2%   | - |
| Cancer                                    | 13% | 12% | 1%   | - |
| Other neurological disorders              | 6%  | 10% | -4%  | - |
| Paralysis                                 | 1%  | 0%  | 0%   | - |
| Psychoses                                 | 9%  | 8%  | 0%   | - |
| Pulmonary circulation disorders           | 3%  | 0%  | 3%   | - |
| Rheumatoid arthritis                      | 7%  | 2%  | 4%   | - |

|                  |    |    |     |   |
|------------------|----|----|-----|---|
| Valvular disease | 5% | 8% | -4% | - |
| Alcohol abuse    | 0% | 6% | -6% | - |
| Drug abuse       | 0% | 5% | -5% | - |
| Smoker           | 2% | 4% | -2% | - |
| Weight loss      | 2% | 2% | 0%  | - |

## Study Rep 33

### Comparison of Table 1 Values for Study Rep 33

| Variable                                                                  | Study | Aet     | Diff     | Std Diff |
|---------------------------------------------------------------------------|-------|---------|----------|----------|
| Number of subjects                                                        | 3,078 | 106,457 | -103,379 | -        |
| Average HbA1c level during the 1-year study period, mean, in % NGSP units | 7.2   | -       | -        | -        |
| Age, Mean (SD)                                                            | 53.4  | 54.9    | -1.5     | -0.2     |
| No. of different hypoglycemic drug classes, Mean (SD)                     | 1.8   | 2.0     | -0.2     | -0.2     |
| Average HbA1c mmol/mol IFCC units, Mean (SD)                              | 55.0  | -       | -        | -        |
| Percentage of time within glyceimic goal (i.e., HbA1c <7%), Mean (SD)     | 50.6  | -       | -        | -        |
| Charlson comorbidity index (without diabetes), Mean (SD)                  | 0.3   | 0.3     | 0.0      | 0.0      |
| Treatment gaps ?90 consecutive days                                       | 13%   | -       | -        | -        |
| Proportion of days of use during the period                               | 21%   | -       | -        | -        |
| Used hypoglycemic agents for more than 80% of the period                  | 71%   | -       | -        | -        |
| Female                                                                    | 41%   | 44%     | -3%      | -        |
| Region, Northeast                                                         | 11%   | 12%     | -1%      | -        |
| Region, North Central                                                     | 19%   | 25%     | -6%      | -        |



|                                                                                           |     |     |     |   |
|-------------------------------------------------------------------------------------------|-----|-----|-----|---|
| Region, South                                                                             | 60% | 49% | 11% | - |
| Region, West                                                                              | 10% | 12% | -2% | - |
| Insurance plan type, Comprehensive Insurance                                              | 4%  | 5%  | -1% | - |
| Insurance plan type, Non-Capitated Point-of-Service (POS)                                 | 21% | 10% | 11% | - |
| Insurance plan type, Preferred Provider Organization (PPO)                                | 70% | 78% | -8% | - |
| Insurance plan type, Consumer-Driven Health Plan (CDHP)                                   | 3%  | 4%  | -1% | - |
| Insurance plan type, High Deductible Health Plan (HDHP)                                   | 1%  | 2%  | -1% | - |
| Alpha-Glucosidase Inhibitors                                                              | 1%  | 1%  | 0%  | - |
| Hypoglycemic Agents - Amylin Analogs                                                      | 0%  | 0%  | 0%  | - |
| Hypoglycemic Agent Combinations                                                           | 27% | 19% | 7%  | - |
| Biguanide Sensitizers                                                                     | 69% | 75% | -5% | - |
| Dipeptidyl Peptidase-4 (DPP-4) Inhibitors                                                 | 16% | 16% | 0%  | - |
| Human Insulin                                                                             | 18% | 16% | 2%  | - |
| Incretin Mimetic Agents (GLP-1 Receptor Agonists)                                         | 8%  | 8%  | 0%  | - |
| Meglitinide Analogues                                                                     | 2%  | 2%  | -0% | - |
| Sulfonylureas                                                                             | 40% | 42% | -2% | - |
| Thiazolidinediones (TZDs)                                                                 | 29% | 22% | 7%  | - |
| Other hypoglycemic agents                                                                 | 2%  | 0%  | 1%  | - |
| >=2 different hypoglycemic drug classes                                                   | 57% | 57% | 0%  | - |
| >=3 different hypoglycemic drug classes                                                   | 20% | 22% | -3% | - |
| Use of bile acid sequestrants                                                             | 2%  | 1%  | 0%  | - |
| Within glycemic goal (i.e., HbA1c level <7% NGSP [ $<53$ mmol/mol IFFC] at the index date | 48% | -   | -   | - |
| Diabetic retinopathy                                                                      | 10% | 4%  | 5%  | - |
| Nephropathy                                                                               | 7%  | 4%  | 3%  | - |
| Neuropathy                                                                                | 9%  | 7%  | 2%  | - |
| Atherosclerosis, aneurysm, or embolism                                                    | 2%  | 8%  | -6% | - |
| Peripheral vascular conditions                                                            | 5%  | 2%  | 3%  | - |
| Cerebrovascular disease                                                                   | 3%  | 2%  | 1%  | - |

|                                           |            |            |            |   |
|-------------------------------------------|------------|------------|------------|---|
| Coronary artery disease                   | <b>8%</b>  | <b>7%</b>  | <b>1%</b>  | - |
| Infections                                | <b>12%</b> | <b>16%</b> | <b>-4%</b> | - |
| Other ocular complications                | <b>15%</b> | <b>8%</b>  | <b>7%</b>  | - |
| Ulceration or diabetic bone changes       | <b>1%</b>  | <b>3%</b>  | <b>-2%</b> | - |
| Ketoacidosis or hyperosmolarity           | <b>0%</b>  | <b>1%</b>  | <b>-0%</b> | - |
| Hypoglycemia                              | <b>2%</b>  | <b>1%</b>  | <b>1%</b>  | - |
| Diabetic coma                             | <b>1%</b>  | <b>0%</b>  | <b>1%</b>  | - |
| Unspecified diabetes-related complication | <b>4%</b>  | -          | -          | - |
| IP admission related to a complication    | <b>1%</b>  | -          | -          | - |
| ER visit related to a complication        | <b>1%</b>  | -          | -          | - |
| Patients seen by an endocrinologist       | <b>12%</b> | -          | -          | - |
| Hypertension and associated conditions    | <b>56%</b> | <b>65%</b> | <b>-9%</b> | - |
| Lipid disorders                           | <b>68%</b> | <b>70%</b> | <b>-1%</b> | - |
| Congestive heart failure                  | <b>1%</b>  | <b>1%</b>  | <b>-0%</b> | - |
| Overweight, obesity                       | <b>5%</b>  | <b>8%</b>  | <b>-3%</b> | - |
| Mental disorder                           | <b>4%</b>  | <b>0%</b>  | <b>3%</b>  | - |
| Other genitourinary system disorder       | <b>10%</b> | <b>12%</b> | <b>-2%</b> | - |
| AIDS                                      | <b>0%</b>  | <b>0%</b>  | <b>-0%</b> | - |
| Anemia                                    | <b>6%</b>  | <b>6%</b>  | <b>-1%</b> | - |
| Chronic pulmonary disease                 | <b>6%</b>  | <b>4%</b>  | <b>3%</b>  | - |
| Coagulopathy                              | <b>1%</b>  | <b>0%</b>  | <b>0%</b>  | - |
| Fluid electrolyte disorders               | <b>2%</b>  | <b>2%</b>  | <b>-1%</b> | - |
| Hypothyroidism                            | <b>11%</b> | <b>11%</b> | <b>-0%</b> | - |
| Liver disease                             | <b>1%</b>  | <b>2%</b>  | <b>-1%</b> | - |
| Cancer                                    | <b>3%</b>  | <b>4%</b>  | <b>-1%</b> | - |
| Other neurological disorders              | <b>1%</b>  | <b>3%</b>  | <b>-2%</b> | - |
| Paralysis                                 | <b>0%</b>  | <b>0%</b>  | <b>0%</b>  | - |
| Psychoses                                 | <b>2%</b>  | <b>2%</b>  | <b>-0%</b> | - |

|                                 |    |    |     |   |
|---------------------------------|----|----|-----|---|
| Pulmonary circulation disorders | 0% | 0% | 0%  | - |
| Rheumatoid arthritis            | 1% | 1% | 1%  | - |
| Valvular disease                | 2% | 2% | -0% | - |
| Alcohol abuse                   | 0% | 2% | -2% | - |
| Drug abuse                      | 0% | 2% | -2% | - |
| Smoker                          | 1% | 2% | -1% | - |
| Weight loss                     | 0% | 1% | -0% | - |

## Study Rep 34

### Comparison of Table 1 Values for Study Rep 34

| Variable                                            | Study    |          |          | Exp      | Study    |          |           | Ref      |              |
|-----------------------------------------------------|----------|----------|----------|----------|----------|----------|-----------|----------|--------------|
|                                                     | Exp      | Aet Exp  | Exp Diff | Std Diff | Ref      | Aet Ref  | Ref Diff  | Std Diff | Diff of Diff |
| Number of subjects                                  | 654      | 6,647    | -5,993   | -        | 654      | 4,185    | -3,531    | -        | -2,462       |
| Modified CCI (mean, SD)                             | 1.1      | 1.7      | -0.5     | -0.3     | 1.1      | 1.8      | -0.7      | -0.5     | 0.2          |
| OAD MPR (mean, SD)                                  | 0.7      | -        | -        | -        | 0.7      | -        | -         | -        | -            |
| A1C % (mean, SD)                                    | 9.4      | -        | -        | -        | 9.5      | -        | -         | -        | -            |
| Total healthcare costs, all-cause (mean, SD)        | 10,442.0 | 15,070.0 | -4,628.0 | -0.1     | 10,069.0 | 24,279.3 | -14,210.3 | -0.3     | 9,582.3      |
| Total healthcare costs, diabetes-related (mean, SD) | 3,739.0  | 6,412.5  | -2,673.5 | -0.2     | 3,662.0  | 8,983.1  | -5,321.1  | -0.3     | 2,647.5      |
| Age category, 18-39                                 | 7%       | 9%       | -2%      | -        | 7%       | 8%       | -2%       | -        | -0%          |
| Age category, 40-64                                 | 84%      | 85%      | -1%      | -        | 86%      | 83%      | 3%        | -        | -4%          |

|                                      |     |     |     |   |     |     |     |   |     |
|--------------------------------------|-----|-----|-----|---|-----|-----|-----|---|-----|
| Age category, 65-74                  | 8%  | 5%  | 3%  | - | 6%  | 7%  | -1% | - | 4%  |
| Age category, 75+                    | 1%  | 1%  | -0% | - | 0%  | 2%  | -1% | - | 1%  |
| Female                               | 43% | 44% | -1% | - | 44% | 45% | -1% | - | 0%  |
| Plan type, HMO                       | 15% | 15% | 0%  | - | 18% | 11% | 7%  | - | -7% |
| Plan type, POS                       | 54% | 62% | -8% | - | 49% | 57% | -8% | - | 0%  |
| Plan type, PPO                       | 13% | 8%  | 5%  | - | 12% | 16% | -3% | - | 9%  |
| Plan type, Other                     | 18% | 16% | 2%  | - | 20% | 16% | 4%  | - | -2% |
| Any hypoglycemia                     | 3%  | 3%  | -0% | - | 4%  | 5%  | -1% | - | 1%  |
| Metformin                            | 60% | 64% | -4% | - | 62% | 62% | 0%  | - | -4% |
| Sulfonylureas                        | 61% | 68% | -6% | - | 64% | 63% | 1%  | - | -7% |
| DPP-4 inhibitor                      | 24% | 27% | -3% | - | 25% | 20% | 5%  | - | -8% |
| GLP-1 receptor analog                | 14% | 20% | -5% | - | 14% | 11% | 3%  | - | -9% |
| Thiazolidinedione                    | 37% | 38% | -2% | - | 35% | 35% | -0% | - | -2% |
| Pramlintide                          | 0%  | 0%  | 0%  | - | 0%  | 0%  | 0%  | - | 0%  |
| ?-glucosidase inhibitor              | 1%  | 1%  | 0%  | - | 1%  | 1%  | -0% | - | 0%  |
| A1C < 7.0%                           | 12% | -   | -   | - | 10% | -   | -   | - | -   |
| A1C >=7.0-8.0%                       | 16% | -   | -   | - | 16% | -   | -   | - | -   |
| A1C >=8.0-9.0%                       | 19% | -   | -   | - | 19% | -   | -   | - | -   |
| A1C >=9.0%                           | 53% | -   | -   | - | 55% | -   | -   | - | -   |
| All-cause ED visit                   | 9%  | 7%  | 2%  | - | 9%  | 7%  | 2%  | - | 0%  |
| All-cause inpatient admission        | 14% | 11% | 3%  | - | 14% | 19% | -4% | - | 7%  |
| Diabetes-related ED visit            | 3%  | 2%  | 1%  | - | 3%  | 2%  | 1%  | - | 1%  |
| Diabetes-related inpatient admission | 10% | 8%  | 2%  | - | 10% | 13% | -2% | - | 5%  |

# Study Rep 35

## Comparison of Table 1 Values for Study Rep 35

| Variable                                        | Study<br>Exp | Aet<br>Exp | Exp<br>Diff | Exp Std<br>Diff | Study<br>Ref | Aet<br>Ref | Ref<br>Diff | Ref<br>Std<br>Diff | Diff<br>of<br>Diff |
|-------------------------------------------------|--------------|------------|-------------|-----------------|--------------|------------|-------------|--------------------|--------------------|
| Number of patients                              | 4,092        | 5,252      | -1,160      | -               | 10,320       | 13,457     | -3,137      | -                  | 1,977              |
| Age 25-34                                       | 4%           | 4%         | -0%         | -               | 33%          | 33%        | 0%          | -                  | -1%                |
| Age 35-44                                       | 46%          | 45%        | 1%          | -               | 55%          | 55%        | 0%          | -                  | 1%                 |
| Age 45-54                                       | 50%          | 51%        | -1%         | -               | 12%          | 12%        | -1%         | -                  | -0%                |
| Region Northeast                                | 14%          | 19%        | -5%         | -               | 14%          | 20%        | -6%         | -                  | 1%                 |
| Region Midwest                                  | 19%          | 19%        | -1%         | -               | 15%          | 15%        | -0%         | -                  | -0%                |
| Region South                                    | 52%          | 45%        | 8%          | -               | 55%          | 47%        | 8%          | -                  | -0%                |
| Region West                                     | 14%          | 14%        | -0%         | -               | 16%          | 16%        | -0%         | -                  | 0%                 |
| Region Unknown                                  | 1%           | 2%         | -2%         | -               | 1%           | 2%         | -1%         | -                  | -1%                |
| Plan type Fee for service                       | 4%           | 3%         | 1%          | -               | 3%           | 3%         | 0%          | -                  | 1%                 |
| Plan type HMO                                   | 29%          | 23%        | 6%          | -               | 24%          | 18%        | 6%          | -                  | -1%                |
| Plan type Point of Service (POS)                | 13%          | 10%        | 3%          | -               | 15%          | 10%        | 5%          | -                  | -2%                |
| Plan type Preferred Provider<br>Organization    | 48%          | 55%        | -7%         | -               | 52%          | 60%        | -9%         | -                  | 1%                 |
| Plan type Capitated POS                         | 2%           | 1%         | 1%          | -               | 2%           | 1%         | 1%          | -                  | -0%                |
| Plan type Consumer Driven<br>Health Plan (CDHP) | 2%           | 5%         | -2%         | -               | 3%           | 5%         | -2%         | -                  | -0%                |
| Year of index date 2009                         | 27%          | -          | -           | -               | 24%          | -          | -           | -                  | -                  |
| NSAIDs (non-steroidal anti-<br>inflammatories)  | 28%          | 27%        | 0%          | -               | 25%          | 25%        | 0%          | -                  | 0%                 |
| Hormone therapy                                 | 31%          | 7%         | 24%         | -               | 40%          | 9%         | 31%         | -                  | -7%                |
| Any inpatient visits                            | 6%           | 5%         | 1%          | -               | 7%           | 7%         | 0%          | -                  | 0%                 |

|                               |     |     |     |   |     |     |     |   |     |
|-------------------------------|-----|-----|-----|---|-----|-----|-----|---|-----|
| Menstrual disorders           | 56% | 60% | -3% | - | 46% | 47% | -1% | - | -2% |
| Pelvic pain                   | 24% | 29% | -5% | - | 31% | 38% | -7% | - | 2%  |
| Anemias                       | 28% | 33% | -4% | - | 18% | 22% | -4% | - | 0%  |
| Inflammatory disease          | 14% | 16% | -2% | - | 18% | 20% | -1% | - | -0% |
| Noninflammatory disease       | 14% | 19% | -5% | - | 18% | 24% | -6% | - | 1%  |
| Endometriosis                 | 2%  | 3%  | -1% | - | 5%  | 8%  | -3% | - | 2%  |
| Pregnancy                     | 3%  | 3%  | 0%  | - | 15% | 14% | 1%  | - | -1% |
| Urinary problems              | 3%  | 7%  | -3% | - | 4%  | 5%  | -1% | - | -2% |
| Constipation or gas           | 3%  | 4%  | -1% | - | 3%  | 4%  | -1% | - | -0% |
| Other disorders of the uterus | 19% | 22% | -3% | - | 13% | 17% | -4% | - | 1%  |
| Genital prolapse              | 0%  | 1%  | -0% | - | 1%  | 1%  | -0% | - | 0%  |
| Benign neoplasm of the uterus | 0%  | 0%  | -0% | - | 0%  | 1%  | -1% | - | 1%  |
| Infertility                   | 1%  | 1%  | 0%  | - | 15% | 16% | -1% | - | 1%  |
| Breast cancer                 | 1%  | 1%  | -0% | - | 0%  | 1%  | -0% | - | 0%  |

## Study Rep 36

### Comparison of Table 1 Values for Study Rep 36

| Variable                                        | Study     |         |          |          | Ref       |         |          |          |              |
|-------------------------------------------------|-----------|---------|----------|----------|-----------|---------|----------|----------|--------------|
|                                                 | Study Exp | Aet Exp | Exp Diff | Std Diff | Study Ref | Aet Ref | Ref Diff | Std Diff | Diff of Diff |
| Number of subjects                              | 17,428    | 17,667  | -239     | -        | 32,890    | 87,889  | -54,999  | -        | 54,760       |
| No. of psychiatric diagnoses, Mean (SD), Median | 1.2       | -       | -        | -        | 1.3       | -       | -        | -        | -            |
| Male                                            | 45%       | 48%     | -3%      | -        | 32%       | 32%     | 0%       | -        | -3%          |

|                                    |     |     |      |   |     |     |     |   |      |
|------------------------------------|-----|-----|------|---|-----|-----|-----|---|------|
| Female                             | 55% | 52% | 3%   | - | 68% | 68% | -0% | - | 3%   |
| age 18-24                          | 11% | 17% | -6%  | - | 13% | 14% | -1% | - | -5%  |
| age 25-34                          | 13% | 13% | 0%   | - | 15% | 14% | 1%  | - | -1%  |
| age 35-44                          | 22% | 19% | 3%   | - | 24% | 23% | 1%  | - | 2%   |
| age 45-54                          | 30% | 26% | 4%   | - | 28% | 28% | 1%  | - | 3%   |
| age 55-64                          | 23% | 24% | -1%  | - | 19% | 21% | -2% | - | 1%   |
| CDHP insurance                     | 1%  | 4%  | -2%  | - | 2%  | 4%  | -2% | - | -1%  |
| COMP insurance                     | 10% | 4%  | 5%   | - | 5%  | 3%  | 2%  | - | 3%   |
| EPO insurance                      | 1%  | 1%  | -1%  | - | 1%  | 1%  | -0% | - | -0%  |
| HMO insurance                      | 21% | 18% | 4%   | - | 17% | 16% | 1%  | - | 3%   |
| POS without capitation insurance   | 10% | 8%  | 2%   | - | 10% | 8%  | 1%  | - | 1%   |
| POS with capitation insurance      | 2%  | 0%  | 1%   | - | 1%  | 1%  | 0%  | - | 1%   |
| PPO insurance                      | 54% | 60% | -6%  | - | 62% | 62% | 0%  | - | -6%  |
| index 2003-2005                    | 49% | -   | -    | - | 11% | -   | -   | - | -    |
| index 2006-2008                    | 37% | 11% | 26%  | - | 43% | 8%  | 34% | - | -8%  |
| index 2009-2010                    | 14% | 40% | -26% | - | 47% | 43% | 4%  | - | -30% |
| Northeast                          | 11% | 18% | -7%  | - | 12% | 17% | -5% | - | -2%  |
| North central                      | 28% | 25% | 3%   | - | 29% | 25% | 3%  | - | -1%  |
| South                              | 36% | 33% | 3%   | - | 42% | 38% | 4%  | - | -1%  |
| West                               | 25% | 22% | 2%   | - | 17% | 18% | -1% | - | 3%   |
| Unknown Region                     | 0%  | 2%  | -1%  | - | 0%  | 2%  | -2% | - | 0%   |
| Schizophrenia                      | 4%  | 8%  | -3%  | - | 2%  | 2%  | 0%  | - | -4%  |
| Dementia                           | 1%  | 1%  | -0%  | - | 0%  | 0%  | 0%  | - | -0%  |
| Bipolar Disorder                   | 17% | 29% | -12% | - | 16% | 20% | -4% | - | -8%  |
| Major depressive disorder          | 40% | 27% | 13%  | - | 55% | 40% | 15% | - | -2%  |
| All other Mental health conditions | 46% | -   | -    | - | 34% | -   | -   | - | -    |
| Hypertension                       | 16% | 18% | -2%  | - | 14% | 17% | -2% | - | 0%   |

|                                |     |     |     |   |     |     |     |   |     |
|--------------------------------|-----|-----|-----|---|-----|-----|-----|---|-----|
| Peripheral vascular disease    | 0%  | 1%  | -1% | - | 0%  | 1%  | -0% | - | -0% |
| hyperlipidemia                 | 10% | 12% | -3% | - | 10% | 12% | -2% | - | -1% |
| Obesity                        | 1%  | 2%  | -1% | - | 3%  | 4%  | -1% | - | 0%  |
| Charlson comorbidity score=0   | 81% | 81% | -1% | - | 85% | 85% | -0% | - | -1% |
| Charlson comorbidity score=1-2 | 13% | 15% | -2% | - | 11% | 13% | -2% | - | 0%  |
| Charlson comorbidity score=3-4 | 4%  | 1%  | 3%  | - | 3%  | 1%  | 3%  | - | 0%  |
| Charlson comorbidity score>4   | 2%  | 3%  | -0% | - | 1%  | 1%  | 0%  | - | -0% |
| Myocardial Infarction          | 0%  | 0%  | 0%  | - | 0%  | 0%  | 0%  | - | 0%  |
| Stroke                         | 2%  | 1%  | 1%  | - | 1%  | 0%  | 0%  | - | 0%  |
| Heart Failure                  | 1%  | 0%  | 0%  | - | 0%  | 0%  | 0%  | - | 0%  |

## Comparison of Health Results for Study Rep 36 (RS33)

### Basic Parameters

| Outcome               | Parameter               | Study Exp | Action Exp | Study Ref | Action Ref |
|-----------------------|-------------------------|-----------|------------|-----------|------------|
| Myocardial infarction | Number of outcomes      | 59        | 20         | 44        | 63         |
| Myocardial infarction | Number of patients      | 17,428    | 17,667     | 32,890    | 87,889     |
| Myocardial infarction | Number of person-years  | -         | 8,409      | -         | 46,090     |
| Myocardial infarction | Risk per 1000           | 3.39      | 1.13       | 1.34      | 0.72       |
| Myocardial infarction | Incidence rate per 1000 | -         | 2.38       | -         | 1.37       |

### Treatment Effect Estimates

| Outcome               | Parameter           | Study Value | Study CI     | Action Value | Action CI    |
|-----------------------|---------------------|-------------|--------------|--------------|--------------|
| Myocardial infarction | Unadjusted estimate | 1.66        | (1.40, 1.96) | 1.73         | (1.22, 2.23) |
| Myocardial infarction | Adjusted estimate   | 1.26        | (0.85, 1.87) | 1.45         | (0.93, 1.98) |



## Study Rep 37

### Comparison of Table 1 Values for Study Rep 37

| Variable                        | Study  | Aet    | Diff | Std Diff |
|---------------------------------|--------|--------|------|----------|
| Number of patients              | 15,655 | 16,601 | -946 | -        |
| endoscopy                       | 4%     | 8%     | -4%  | -        |
| Non-smoker                      | 36%    | 52%    | -15% | -        |
| Former smoker                   | 20%    | 22%    | -2%  | -        |
| current smoker                  | 10%    | 12%    | -1%  | -        |
| Not recorded                    | 34%    | -      | -    | -        |
| 0 systemic steroid dispensings  | 67%    | -      | -    | -        |
| 1-3 systemic steroid dispensing | 14%    | -      | -    | -        |
| 4 systemic steroid dispensings  | 19%    | -      | -    | -        |
| BMI <20                         | 6%     | 9%     | -3%  | -        |
| BMI 20 - 24                     | 18%    | 29%    | -11% | -        |
| BMI 25 - 29                     | 16%    | 23%    | -7%  | -        |
| BMI 30 - 35                     | 7%     | 9%     | -2%  | -        |
| BMI 36+                         | 3%     | 4%     | -1%  | -        |
| BMI missing                     | 50%    | -      | -    | -        |

## Study Rep 38

## Comparison of Table 1 Values for Study Rep 38

| Variable                                  | Study  | Aet     | Diff     | Std Diff |
|-------------------------------------------|--------|---------|----------|----------|
| Number of subjects                        | 21,976 | 225,643 | -203,667 | -        |
| Age, Mean                                 | 56.1   | -       | -        | -        |
| Males                                     | 67%    | -       | -        | -        |
| Hypertension                              | 48%    | 60%     | -12%     | -        |
| Diabetes                                  | 22%    | 24%     | -2%      | -        |
| Heart failure                             | 12%    | 16%     | -4%      | -        |
| Acute myocardial infarction               | 2%     | 2%      | -0%      | -        |
| Coronary heart disease                    | 20%    | 24%     | -4%      | -        |
| Other arrhythmias                         | 20%    | 31%     | -11%     | -        |
| CHADS2 Score Category: Low Risk           | 42%    | 33%     | 9%       | -        |
| CHADS2 Score Category: Moderate Risk      | 36%    | 37%     | -1%      | -        |
| CHADS2 Score Category: High Risk          | 22%    | 30%     | -8%      | -        |
| CHADS2 VASc Score Category: Low Risk      | 22%    | 17%     | 5%       | -        |
| CHADS2 VASc Score Category: Moderate Risk | 32%    | 29%     | 3%       | -        |
| CHADS2 VASc Score Category: High Risk     | 46%    | 54%     | -8%      | -        |

## Study Rep 39

### Comparison of Table 1 Values for Study Rep 39

| Variable           | Study  | Aet    | Diff   | Std Diff |
|--------------------|--------|--------|--------|----------|
| Number of patients | 31,408 | 38,153 | -6,745 | -        |
| Age <18            | 0%     | 0%     | -0%    | -        |

|                                 |     |     |     |   |
|---------------------------------|-----|-----|-----|---|
| Age 18-29                       | 0%  | 0%  | -0% | - |
| Age 30-49                       | 7%  | 7%  | -1% | - |
| Age 50-64                       | 39% | 42% | -3% | - |
| Age 65-70                       | 14% | 12% | 3%  | - |
| Age 71+                         | 40% | 39% | 1%  | - |
| Female                          | 40% | 39% | 1%  | - |
| Northeast Region                | 12% | 17% | -5% | - |
| Midwest Region                  | 30% | 28% | 2%  | - |
| South Region                    | 39% | 38% | 0%  | - |
| West Region                     | 18% | 16% | 2%  | - |
| Unknown Region                  | 1%  | 1%  | 0%  | - |
| Year of First Prescription 2009 | 14% | 14% | 1%  | - |
| Year of First Prescription 2010 | 47% | 44% | 4%  | - |
| Year of First Prescription 2011 | 38% | 43% | -5% | - |
| Year of First Prescription 2012 | 0%  | -   | -   | - |
| Enrollment 1-3 months           | 1%  | -   | -   | - |
| Enrollment 4-6 months           | 1%  | -   | -   | - |
| Enrollment 7-12 months          | 3%  | 1%  | 2%  | - |
| Enrollment 13+ months           | 95% | 98% | -3% | - |

## Study Rep 40

### Comparison of Table 1 Values for Study Rep 40

| Variable | Study | Aet | Diff | Std Diff |
|----------|-------|-----|------|----------|
|----------|-------|-----|------|----------|

|                                 |              |              |             |   |
|---------------------------------|--------------|--------------|-------------|---|
| Number of patients              | <b>7,025</b> | <b>7,143</b> | <b>-118</b> | - |
| Age <18                         | <b>0%</b>    | <b>0%</b>    | <b>0%</b>   | - |
| Age 18-29                       | <b>1%</b>    | <b>1%</b>    | <b>-0%</b>  | - |
| Age 30-49                       | <b>12%</b>   | <b>13%</b>   | <b>-1%</b>  | - |
| Age 50-64                       | <b>55%</b>   | <b>56%</b>   | <b>-1%</b>  | - |
| Age 65-70                       | <b>15%</b>   | <b>12%</b>   | <b>3%</b>   | - |
| Age 71+                         | <b>17%</b>   | <b>18%</b>   | <b>-1%</b>  | - |
| Female                          | <b>31%</b>   | <b>31%</b>   | <b>0%</b>   | - |
| Northeast Region                | <b>9%</b>    | <b>8%</b>    | <b>0%</b>   | - |
| Midwest Region                  | <b>24%</b>   | <b>24%</b>   | <b>0%</b>   | - |
| South Region                    | <b>53%</b>   | <b>53%</b>   | <b>0%</b>   | - |
| West Region                     | <b>14%</b>   | <b>15%</b>   | <b>-1%</b>  | - |
| Unknown Region                  | <b>0%</b>    | <b>0%</b>    | <b>-0%</b>  | - |
| Year of First Prescription 2009 | <b>15%</b>   | <b>15%</b>   | <b>0%</b>   | - |
| Year of First Prescription 2010 | <b>43%</b>   | <b>43%</b>   | <b>0%</b>   | - |
| Year of First Prescription 2011 | <b>36%</b>   | <b>36%</b>   | <b>-0%</b>  | - |
| Year of First Prescription 2012 | <b>6%</b>    | <b>6%</b>    | <b>-0%</b>  | - |
| Enrollment 1-3 months           | <b>2%</b>    | <b>9%</b>    | <b>-6%</b>  | - |
| Enrollment 4-6 months           | <b>1%</b>    | <b>3%</b>    | <b>-2%</b>  | - |
| Enrollment 7-12 months          | <b>4%</b>    | <b>7%</b>    | <b>-3%</b>  | - |
| Enrollment 13+ months           | <b>92%</b>   | <b>81%</b>   | <b>12%</b>  | - |
