# Supplementary material
Source: PubMed Central journal article supplement (PMC7833029)
Supplement: NIHMS1659462-supplement-Appendix_C.pdf [file NIHMS1659462-supplement-Appendix_C.pdf]

ACE inhibitors vs beta blockers / MI

---

## AETION STANDARD ABBREVIATIONS

|       |                                                     |
|-------|-----------------------------------------------------|
| AIC   | Akaike Information Criterion                        |
| CI    | Confidence Interval                                 |
| GLM   | Generalized Linear Model                            |
| HIPAA | Health Insurance Portability and Accountability Act |
| HR    | Hazard Ratio                                        |
| IQR   | Interquartile Range                                 |
| ITT   | Intention-to-Treat                                  |
| OR    | Odds Ratio                                          |
| PS    | Propensity Score                                    |
| RD    | Rate Difference, Risk Difference                    |
| RR    | Rate Ratio, Risk Ratio                              |
| SD    | Standard Deviation                                  |

---

# INTRODUCTION

## **Report Generation**

This is an automated report generated by the Action Evidence Generation Platform using the Safety Evaluation Application version R1.1.20150619\_1347-2-g37da699.

---

## METHODS

### **Study Design**

The study presented is a cohort study. The study design and analytics follow a basic pharmacoepidemiology study design<sup>1</sup> and are reported following the STROBE guideline.<sup>2</sup>

### **Data Sources**

#### *United Optum*

The Optum Research Database, a product of Optum, Inc. (Eden Prairie, MN), consists of pharmacy and medical claims from United Health Group and non-United Health Group commercial insurance plans. The individuals covered by these health plans are geographically diverse across the US, with greatest representation in the South and Northeast US census regions (majority of Medicare Advantage patients are in South and West). Approximately 10% of the commercially-insured population with both medical and pharmacy benefits in the database are employer-sponsored Medicare Advantage beneficiaries. Members have, on average, 2.7 years of continuous enrollment, with 81% having 1 or more medical claims, and 72% having 1 or more pharmacy claim, per year (92% and 81%, for Medicare Advantage members, respectively). The plans provide fully insured coverage for outpatient prescription medication, professional (e.g., physician), and facility (e.g., hospital) services. The medical and pharmacy claims files contain details on date of service, place of service, ICD-9-CM codes, CPT codes, provider type, NDCs, drug quantity dispensed, days supplied, charges, deductibles and copayments. The member file includes information on eligibility periods as well as patient demographic data.

#### *General Notes on Administrative Data*

Electronic outpatient pharmacy dispensing records are considered accurate because pharmacists fill prescriptions with little room for interpretation, and are reimbursed by insurers on the basis of detailed, complete, and accurate claims submitted electronically.<sup>3,4</sup> Pharmacy dispensing information is usually seen as the gold standard of drug exposure information compared to self-reported information<sup>5</sup> or prescribing records in outpatient medical records.<sup>6</sup> Drugs used during hospital stays are not recorded in this data source. Prescribing information based on physician notes may overestimate actual medication use because up to 50% of prescriptions are never filled at the pharmacy.<sup>7</sup>

#### *General Notes on Safety Research with Secondary Healthcare Databases*

Secondary healthcare databases (claims, electronic medical records) are the preferred data source for most post-marketing drug safety research.<sup>8</sup> These data sources reflect health service use patterns, comorbidity, and co-medications of patients in real-world, usual care settings and are therefore suitable to study medication safety and effectiveness in routine care. Because of the large numbers of patients in these databases, it is possible to detect rare safety events.

## Subjects

### *Exposure Groups*

Subjects were defined by exposure to one of two exposure groups between January 01, 2010 and September 30, 2013. The exposure groups were **Use of beta blocker** and **Use of lisinopril**. Of these, the referent group was defined as **Use of beta blocker**. See the appendix for details of exposure group definitions.

For the purposes of identifying potential qualifying cohort entry dates, exposure periods are combined into episodes using a grace period of 30 days and risk period of 30 days.

Only incident (new) users of these agents were included.<sup>1</sup> Those patients who had been exposed to an agent in their exposure group in the 183 days prior to the cohort entry date were excluded.

Evaluating only incident users has several advantages in the analyses of healthcare databases. It can make patients more similar as they were evaluated by a physician and it was decided to initiate treatment upon review of their health state, it increases the likelihood that patients are at the same phase of treatment, it allows displaying time-varying treatment hazards distinguishing between early and late events, and it provides clear temporality between pre-treatment characteristics and post-treatment events.<sup>9,10</sup>

Only a single cohort entry was allowed per patient. If a patient qualified for the cohort multiple times, the patient entered the cohort on the first qualifying event after exclusion criteria were applied.

Patients were required to be enrolled, as defined by **Enrollment**, on the cohort entry date and during the 183 days prior to cohort entry .

Patients starting an exposure period for more than one exposure group on the cohort entry date were excluded.

### *Study Outcomes*

The following study outcomes were defined:

- **Occurrence of angioedema (inpatient)** measured over the time period beginning on the start of the follow-up period, and ending on the end of the follow-up period. The aggregation used is to set to true if this event started.

See the appendix for details of the study outcome definitions.

### *Exclusion Criteria*

Patients were excluded by factors pertaining to: **Age**, **Age**, **Change in gender**, **Occurrence of angioedema (ambulatory)**, **Occurrence of angioedema (inpatient)**, and **Use of beta blocker OR lisinopril (for new use exclusion)**.

Specifically, the exclusion criteria were defined as:

- **Age** measured over the time period beginning on the start of all available data, and ending one day prior to the cohort entry date. The aggregation used is to take the last value in the time period. The exclusion criterion will trigger if the value is missing.
- **Age** measured over the time period beginning on the start of all available data, and ending one day prior to the cohort entry date. The aggregation used is to take the last value in the time period. The exclusion criterion will trigger if the value is less than 18.0.
- **Change in gender** measured over the time period beginning on the start of all available data, and ending one day prior to the cohort entry date. The aggregation used is to set to true if this flag was ever true.
- **Occurrence of angioedema (ambulatory)** measured over the time period beginning 183 days prior to the cohort entry date, and ending one day prior to the cohort entry date. The aggregation used is to set to true if this event ever occurred.
- **Occurrence of angioedema (inpatient)** measured over the time period beginning 183 days prior to the cohort entry date, and ending one day prior to the cohort entry date. The aggregation used is to set to true if this event ever occurred.
- **Use of beta blocker OR lisinopril (for new use exclusion)** measured over the time period beginning 183 days prior to the cohort entry date, and ending one day prior to the cohort entry date. The aggregation used is to set to true if this flag was ever true.

See the appendix for details of exclusion criteria definitions.

## *Covariates*

### Baseline covariates

This study did not include any basic covariates.

This study included additional investigator-defined covariates to more fully characterize the patients' health state and/or demographics for this analysis. The additional investigator-specified covariates were: **Age**, **Age Categories**, **Gender**, **Occurrence of allergic reaction**, **Occurrence of diabetes**, **Occurrence of heart failure**, **Occurrence of ischemic heart disease**, **Use of NSAID**, **Generic drug**, **Use of any drug**, **Any inpatient visit**, **Any ED visit**, **Any ambulatory visit (without inpatient POS)**, **Any other ambulatory visit**, **CCI Combined Comorbidity Score (180 days)**, and **Any IS event, including 3-day minimum**.

Only complete cases were included in analyses. Observations with a missing value for any covariate were excluded from the analysis.

### Time-varying Covariates during Follow-Up

This study defined no time-varying covariates during follow-up.

## *Feasibility Analysis*

In order to determine the feasibility of this study in the selected database, a feasibility study was conducted. The analysis includes calculation of incidence rates or risks in the primary

study population for the defined follow-up time. Incidence rates or risks were only reported for the overall population. Values were not reported by exposure status, as to maintain blinding towards the potential findings of this study. An empirically-observed baseline risk was estimated as the number of events in the population divided by the number of patients. Based on this baseline risk, the number of exposed and unexposed patients, and an assumed alpha level of 5%, a simple power analysis was conducted. Using a two-sided chi-square test to compare two proportions we computed the statistical power for relative risks ranging from 1.2 to 4.0.<sup>11</sup>

## **Propensity Score Analysis**

This section describes the general approach to propensity scores used throughout the analysis. Specific uses of the techniques described below are indicated in later sections.

**Estimation of propensity scores.** Propensity scores were estimated using logistic regression. The treatment was specified as the dependent variable. All confounders listed [above](#) were entered as independent variables without further variable selection.<sup>12,13</sup> Patients' propensity score values were predicted using the resulting regression model.<sup>14,15</sup> A pre-matching model c-statistic provides information on how well baseline covariates can predict treatment choice.

**Propensity score 1:1 matched analyses.** Propensity score matching was performed using 1:1 nearest neighbor matching with a maximum matching caliper (see analysis details sections that follow). In matched propensity score analyses, multivariate adjustment was achieved through the matching process. After matching, the treatment effect measures were directly derived from the balanced populations without any further adjustment.<sup>14</sup> We plot exposure-specific propensity score distributions to inspect the suitability of the comparison group.<sup>16</sup> Differences in the confounder distributions between exposure groups are displayed to inspect successful confounder balance in measured characteristics. A post-matching C-statistic is computed as a summary metric for confounder balance. C-statistics close to 0.5 represent good overall balance.<sup>17</sup>

## **Statistical Analysis**

### *Primary Analysis*

#### Baseline covariate assessment

In the primary analysis, the baseline covariates were assessed by default in the period beginning 183 days prior to the cohort entry date, and ending one day prior to the cohort entry date.

#### Follow-up for Outcomes

The primary analysis used a variable-length follow-up design. Follow-up began on the cohort entry date and was carried out until one of the following events occurred:

- The occurrence of outcome
- Disenrollment
- A calendar date is reached: September 30, 2013
- Termination of index exposure, with a grace period of 30 days and a risk window of 30 days
- Crossover of exposure group or addition of drug from the other exposure group

Cox proportional hazard regression was used to estimate multivariate adjusted hazard ratios (HR).<sup>18</sup> The regression model was specified with a function of time as the dependent variable, and treatment as the independent variable. Other covariates were included as independent variables as noted below. Kaplan-Meier plots and plots of Schoenfeld residuals were used to visually inspect whether hazards were proportional, and a  $p$ -value for testing the multiplicative interaction term between treatment group and duration of use is reported.<sup>19,20</sup>

To quantify the precision of effect estimates, 95% confidence intervals are reported.

#### Variable selection and confounding adjustment

Multivariate models were used to adjust for confounding. The following models were estimated, representing increasing amounts of confounding adjustment: Model with exposure only (crude model); Model with exposure and basic covariates; Model with exposure, basic covariates and additional investigator-specified covariates.<sup>21</sup> All variables were included in the regression models without further selection.

#### Propensity score analysis

The primary analysis included 1:1 (with a caliper of 5%) propensity score matched analyses.

#### *Software*

All analyses were conducted with the Action Evidence Generation Platform using the Safety Evaluation Application, version R1.1.20150619\_1347-2-g37da699. Statistical computations were conducted using R version 3.1.2 (2014-10-31).<sup>22</sup>



---

# RESULTS

## Occurrence of angioedema (inpatient) Results

### *Primary Analysis Results*

#### Population Characteristics for the Primary Patient Population

|                                                                             | Less Excluded<br>Patients | Remaining<br>Patients |
|-----------------------------------------------------------------------------|---------------------------|-----------------------|
| All patients                                                                |                           | 55,050,262            |
| Did not meet cohort entry criteria                                          | -53,485,787               | 1,564,475             |
| Entry not during enrollment                                                 | -387,307                  | 1,177,168             |
| Referent prior use                                                          | -193,915                  | 983,253               |
| Exposed prior use                                                           | -114,841                  | 868,412               |
| Entry with multiple exposures                                               | -17,879                   | 850,533               |
| Excluded based on Age                                                       | 0                         | 850,533               |
| Excluded based on Age                                                       | -6,704                    | 843,829               |
| Excluded based on Change in gender                                          | 0                         | 843,829               |
| Excluded based on Occurrence of angioedema (ambulatory)                     | -928                      | 842,901               |
| Excluded based on Occurrence of angioedema (inpatient)                      | 0                         | 842,901               |
| Excluded based on Use of beta blocker OR lisinopril (for new use exclusion) | -93,671                   | 749,230               |
| Final cohort                                                                |                           | 749,230               |

**Table 1:** CONSORT-style patient flow table

The following table displays population characteristics for the primary patient population. Characteristics displayed below are those that were chosen for confounding adjustment (basic and additional investigator-specified).

| Variable                                                | Value           |
|---------------------------------------------------------|-----------------|
| Number of patients                                      | 749,230         |
| Age; mean (sd)                                          | 50.19 (12.45)   |
| Age Categories                                          |                 |
| ...<18; n (%)                                           | 0 (0.0%)        |
| ...18-44; n (%)                                         | 230,790 (30.8%) |
| ...45-54; n (%)                                         | 224,756 (30.0%) |
| ...55-64; n (%)                                         | 226,613 (30.2%) |
| ...>65; n (%)                                           | 67,071 (9.0%)   |
| Gender                                                  |                 |
| ...Male; n (%)                                          | 391,477 (52.3%) |
| ...Female; n (%)                                        | 357,710 (47.7%) |
| ...Unknown; n (%)                                       | 43 (0.0%)       |
| Occurrence of allergic reaction; n (%)                  | 67,328 (9.0%)   |
| Occurrence of diabetes; n (%)                           | 134,969 (18.0%) |
| Occurrence of heart failure; n (%)                      | 8,746 (1.2%)    |
| Occurrence of ischemic heart disease; n (%)             | 69,359 (9.3%)   |
| Use of NSAID; n (%)                                     | 92,763 (12.4%)  |
| Generic drug; mean (sd)                                 | 4.26 (4.10)     |
| Use of any drug; mean (sd)                              | 9.88 (11.55)    |
| Any inpatient visit; mean (sd)                          | 0.16 (0.50)     |
| Any ED visit; mean (sd)                                 | 0.26 (1.62)     |
| Any ambulatory visit (without inpatient POS); mean (sd) | 7.36 (13.27)    |
| Any other ambulatory visit; mean (sd)                   | 0.50 (4.42)     |
| CCI Combined Comorbidity Score (180 days); mean (sd)    | 0.13 (1.31)     |
| Any IS event, including 3-day minimum; mean (sd)        | 0.10 (1.56)     |

**Table 2:** Unstratified patient characteristics for the primary patient population

The following table displays the characteristics of the primary patient population stratified by exposure status. Characteristics displayed below are those that were chosen for confounding adjustment (basic and additional investigator-specified). The differences in proportions and means of patient characteristics between the exposure and referent groups are displayed with confidence intervals. The *p*-values shown are the *p* for differences on patient characteristics between the exposure and referent groups.

| Variable                                                | Use of beta blocker | Use of lisinopril | Difference              | p      |
|---------------------------------------------------------|---------------------|-------------------|-------------------------|--------|
| Number of patients                                      | 414,724             | 334,506           | -                       | -      |
| Age; mean (sd)                                          | 50.06 (13.41)       | 50.34 (11.16)     | -0.28 (-0.34, -0.23)    | < 0.01 |
| Age Categories                                          |                     |                   |                         |        |
| ...<18; n (%)                                           | 0 (0.0%)            | 0 (0.0%)          | 0.0% (0.0%, 0.0%)       | -      |
| ...18-44; n (%)                                         | 133,684 (32.2%)     | 97,106 (29.0%)    | 3.2% (3.0%, 3.4%)       | < 0.01 |
| ...45-54; n (%)                                         | 112,793 (27.2%)     | 111,963 (33.5%)   | -6.3% (-6.5%, -6.1%)    | < 0.01 |
| ...55-64; n (%)                                         | 124,856 (30.1%)     | 101,757 (30.4%)   | -0.3% (-0.5%, -0.1%)    | < 0.01 |
| ...>65; n (%)                                           | 43,391 (10.5%)      | 23,680 (7.1%)     | 3.4% (3.3%, 3.5%)       | < 0.01 |
| Gender                                                  |                     |                   |                         |        |
| ...Male; n (%)                                          | 194,651 (46.9%)     | 196,826 (58.8%)   | -11.9% (-12.1%, -11.7%) | < 0.01 |
| ...Female; n (%)                                        | 220,047 (53.1%)     | 137,663 (41.2%)   | 11.9% (11.7%, 12.1%)    | < 0.01 |
| ...Unknown; n (%)                                       | 26 (0.0%)           | 17 (0.0%)         | 0.0% (-0.0%, 0.0%)      | 0.60   |
| Occurrence of allergic reaction; n (%)                  | 40,107 (9.7%)       | 27,221 (8.1%)     | 1.5% (1.4%, 1.7%)       | < 0.01 |
| Occurrence of diabetes; n (%)                           | 59,597 (14.4%)      | 75,372 (22.5%)    | -8.2% (-8.3%, -8.0%)    | < 0.01 |
| Occurrence of heart failure; n (%)                      | 7,164 (1.7%)        | 1,582 (0.5%)      | 1.3% (1.2%, 1.3%)       | < 0.01 |
| Occurrence of ischemic heart disease; n (%)             | 56,048 (13.5%)      | 13,311 (4.0%)     | 9.5% (9.4%, 9.7%)       | < 0.01 |
| Use of NSAID; n (%)                                     | 52,849 (12.7%)      | 39,914 (11.9%)    | 0.8% (0.7%, 1.0%)       | < 0.01 |
| Generic drug; mean (sd)                                 | 4.71 (4.37)         | 3.69 (3.67)       | 1.02 (1.00, 1.04)       | < 0.01 |
| Use of any drug; mean (sd)                              | 11.00 (12.35)       | 8.49 (10.30)      | 2.51 (2.46, 2.56)       | < 0.01 |
| Any inpatient visit; mean (sd)                          | 0.22 (0.58)         | 0.09 (0.37)       | 0.13 (0.13, 0.13)       | < 0.01 |
| Any ED visit; mean (sd)                                 | 0.29 (1.72)         | 0.23 (1.47)       | 0.06 (0.05, 0.06)       | < 0.01 |
| Any ambulatory visit (without inpatient POS); mean (sd) | 8.62 (14.86)        | 5.79 (10.79)      | 2.84 (2.78, 2.90)       | < 0.01 |
| Any other ambulatory visit; mean (sd)                   | 0.59 (5.05)         | 0.38 (3.48)       | 0.21 (0.20, 0.23)       | < 0.01 |

|                                                      |             |              |                   |        |
|------------------------------------------------------|-------------|--------------|-------------------|--------|
| CCI Combined Comorbidity Score (180 days); mean (sd) | 0.30 (1.48) | -0.07 (1.03) | 0.37 (0.36, 0.37) | < 0.01 |
| Any IS event, including 3-day minimum; mean (sd)     | 0.14 (1.86) | 0.06 (1.08)  | 0.08 (0.07, 0.09) | < 0.01 |

**Table 3:** Patient characteristics for the primary patient population stratified by exposure status

### Feasibility and Power for the Primary Analysis

The following table displays basic event counts to determine study feasibility for the primary patient population with the analytic parameters specified in the primary analysis.

| Variable                                         | Value      |
|--------------------------------------------------|------------|
| Number of patients in full cohort                | 749,230    |
| Number of patients dropped as incomplete cases   | 0          |
| Number of patients that did not begin follow-up  | 0          |
| Number of patients in analytic cohort            | 749,230    |
| Number of events                                 | 111        |
| Number of person-years                           | 361,403.20 |
| Number of patients in group: Use of beta blocker | 414,724    |
| Number of patients in group: Use of lisinopril   | 334,506    |
| Risk per 1,000 patients                          | 0.15       |
| Rate per 1,000 patients                          | 0.31       |

**Table 4:** Summary parameters of the study population to inspect study feasibility

The following table displays the power to detect the respective levels of relative risk for the primary patient population with the analytic parameters specified in the primary analysis.

| Observed Ratio of Exposed to Referent | Observed Baseline Risk per 1,000 Patients | Desired Relative Risk | Power |
|---------------------------------------|-------------------------------------------|-----------------------|-------|
| 0.81:1                                | 0.00                                      | 1.05                  | 0.04  |
| 0.81:1                                | 0.00                                      | 1.25                  | 0.24  |
| 0.81:1                                | 0.00                                      | 1.50                  | 0.66  |
| 0.81:1                                | 0.00                                      | 2.00                  | 0.99  |
| 0.81:1                                | 0.00                                      | 3.00                  | 1.00  |
| 0.81:1                                | 0.00                                      | 4.00                  | 1.00  |

**Table 5:** Statistical power to detect a non-null exposure-outcome association at the noted relative risk levels with an alpha of 0.05

### Follow-up of Patients in the Primary Analysis

The following table displays the median follow-up time (in days) and inter-quartile range in the primary patient population as well as follow-up time stratified by exposure group.

| Patient Group              | Median Follow-Up Time (Days) [IQR] |
|----------------------------|------------------------------------|
| Overall Patient Population | 92 [59, 205]                       |
| Referent                   | 87 [59, 195]                       |
| Exposure                   | 101 [59, 214]                      |

**Table 6:** Median follow-up time (in days) and inter-quartile range for the primary patient population and for each exposure group

The following table displays the censoring reasons for the primary patient population and for each exposure group.

|                                 | Overall         | Use of beta blocker | Use of lisinopril |
|---------------------------------|-----------------|---------------------|-------------------|
| Outcome                         | 111 (0.0%)      | 45 (0.0%)           | 66 (0.0%)         |
| Start of an additional exposure | 34,358 (4.6%)   | 17,899 (4.3%)       | 16,459 (4.9%)     |
| End of index exposure           | 494,655 (66.0%) | 275,531 (66.4%)     | 219,124 (65.5%)   |
| Specified date reached          | 683 (0.1%)      | 379 (0.1%)          | 304 (0.1%)        |
| End of patient data             | 110,055 (14.7%) | 60,552 (14.6%)      | 49,503 (14.8%)    |
| End of patient enrollment       | 109,368 (14.6%) | 60,318 (14.5%)      | 49,050 (14.7%)    |

**Table 7:** Reasons for censoring in the primary patient population and for each exposure group

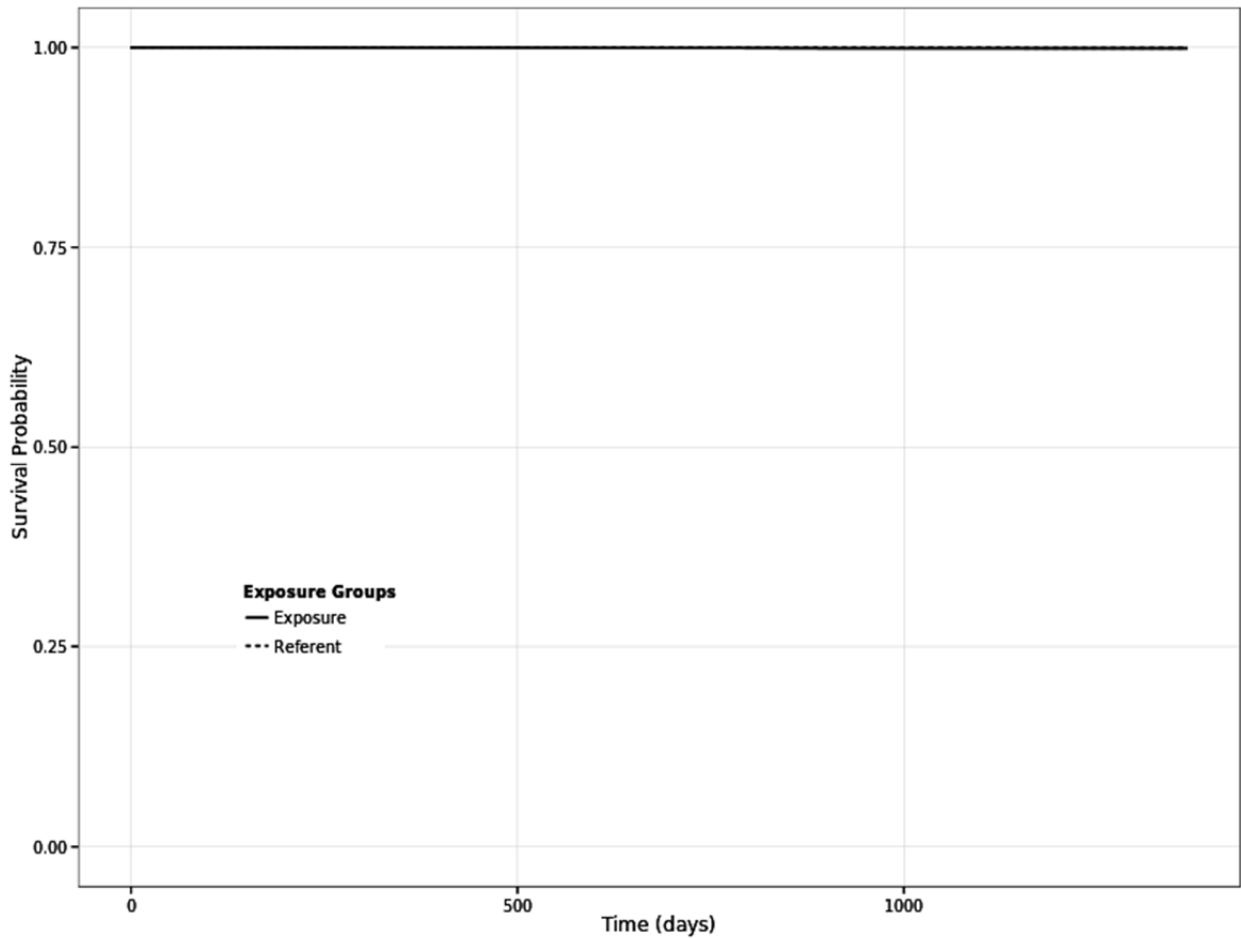

**Figure 1:** Kaplan-Meier plot comparing Use of lisinopril (exposure) to Use of beta blocker (referent) with respect to the outcome of Occurrence of angioedema (inpatient). Time is measured in days.

Treatment Effect Estimates for the Primary Analysis

The table below displays risks by exposure status and risk ratio and risk difference estimates, without confounder adjustment.

| Parameter                                                 | Use of beta blocker | Use of lisinopril |
|-----------------------------------------------------------|---------------------|-------------------|
| Number of patients                                        | 414,724             | 334,506           |
| Number of events                                          | 45                  | 66                |
| Risk per 1,000 patients                                   | 0.11                | 0.20              |
| Risk ratio (vs. referent; 95% CI)                         | Referent            | 1.82 (1.24, 2.66) |
| Risk difference per 1,000 patients (vs. referent; 95% CI) | Referent            | 0.09 (0.03, 0.15) |

**Table 8:** Summary of basic risk parameters, stratified by exposure status

The table below displays rates by exposure status and rate ratio and rate difference estimates, without confounder adjustment.

| Parameter                                                     | Use of beta blocker | Use of lisinopril |
|---------------------------------------------------------------|---------------------|-------------------|
| Number of patients                                            | 414,724             | 334,506           |
| Number of person-years                                        | 195,312             | 166,091           |
| Number of events                                              | 45                  | 66                |
| Rate per 1,000 person-years                                   | 0.23                | 0.40              |
| Rate ratio (vs. referent; 95% CI)                             | Referent            | 1.72 (1.18, 2.52) |
| Rate difference per 1,000 person-years (vs. referent; 95% CI) | Referent            | 0.17 (0.05, 0.28) |

**Table 9:** Summary of basic rate parameters, stratified by exposure status

The following table summarizes the observed treatment effect as estimated with varying degrees of confounder adjustment by the selected models, as described in the analytic plan. Details of each model are shown in later sections.

| Model                         | Hazard Ratio      | p      |
|-------------------------------|-------------------|--------|
| Unadjusted                    | 1.75 (1.20, 2.55) | < 0.01 |
| Adjusted by basic confounders | 1.75 (1.20, 2.55) | < 0.01 |
| Adjusted by all confounders   | 2.34 (1.55, 3.52) | < 0.01 |
| Propensity score matched      | 2.45 (1.50, 4.01) | < 0.01 |

**Table 10:** Summary of ratio measure outcome models with increasing levels of confounding adjustment using Cox proportional hazards model

### Propensity Score Matched Analysis

The following table shows patient characteristics in the 1:1 propensity score matched population, stratified by exposure status. Characteristics displayed below are those used in the propensity score model (basic and additional investigator-specified). The differences in proportions and means of patient characteristics between the exposure and referent groups are displayed with confidence intervals. The *p*-values shown are the *p* for differences on patient characteristics between the exposure and referent groups.

| Variable                                                | Use of beta blocker | Use of lisinopril | Difference           | p      |
|---------------------------------------------------------|---------------------|-------------------|----------------------|--------|
| Number of patients                                      | 276,223             | 276,223           | -                    | -      |
| Age; mean (sd)                                          | 50.72 (11.97)       | 50.31 (11.60)     | 0.42 (0.35, 0.48)    | < 0.01 |
| Age Categories                                          |                     |                   |                      |        |
| ...<18; n (%)                                           | 0 (0.0%)            | 0 (0.0%)          | 0.0% (0.0%, 0.0%)    | -      |
| ...18-44; n (%)                                         | 79,270 (28.7%)      | 82,579 (29.9%)    | -1.2% (-1.4%, -1.0%) | < 0.01 |
| ...45-54; n (%)                                         | 87,540 (31.7%)      | 86,073 (31.2%)    | 0.5% (0.3%, 0.8%)    | < 0.01 |
| ...55-64; n (%)                                         | 86,610 (31.4%)      | 85,575 (31.0%)    | 0.4% (0.1%, 0.6%)    | < 0.01 |
| ...>65; n (%)                                           | 22,803 (8.3%)       | 21,996 (8.0%)     | 0.3% (0.1%, 0.4%)    | < 0.01 |
| Gender                                                  |                     |                   |                      |        |
| ...Male; n (%)                                          | 150,848 (54.6%)     | 147,160 (53.3%)   | 1.3% (1.1%, 1.6%)    | < 0.01 |
| ...Female; n (%)                                        | 125,362 (45.4%)     | 129,046 (46.7%)   | -1.3% (-1.6%, -1.1%) | < 0.01 |
| ...Unknown; n (%)                                       | 13 (0.0%)           | 17 (0.0%)         | -0.0% (-0.0%, 0.0%)  | 0.58   |
| Occurrence of allergic reaction; n (%)                  | 23,459 (8.5%)       | 24,134 (8.7%)     | -0.2% (-0.4%, -0.1%) | < 0.01 |
| Occurrence of diabetes; n (%)                           | 44,587 (16.1%)      | 45,111 (16.3%)    | -0.2% (-0.4%, 0.0%)  | 0.06   |
| Occurrence of heart failure; n (%)                      | 1,980 (0.7%)        | 1,560 (0.6%)      | 0.2% (0.1%, 0.2%)    | < 0.01 |
| Occurrence of ischemic heart disease; n (%)             | 14,639 (5.3%)       | 13,310 (4.8%)     | 0.5% (0.4%, 0.6%)    | < 0.01 |
| Use of NSAID; n (%)                                     | 32,967 (11.9%)      | 33,638 (12.2%)    | -0.2% (-0.4%, -0.1%) | < 0.01 |
| Generic drug; mean (sd)                                 | 3.88 (3.69)         | 3.91 (3.81)       | -0.03 (-0.05, -0.01) | 0.01   |
| Use of any drug; mean (sd)                              | 8.99 (10.42)        | 9.01 (10.72)      | -0.02 (-0.07, 0.04)  | 0.57   |
| Any inpatient visit; mean (sd)                          | 0.11 (0.38)         | 0.10 (0.40)       | 0.01 (0.00, 0.01)    | < 0.01 |
| Any ED visit; mean (sd)                                 | 0.24 (1.55)         | 0.25 (1.54)       | -0.01 (-0.02, -0.00) | 0.04   |
| Any ambulatory visit (without inpatient POS); mean (sd) | 6.34 (10.53)        | 6.25 (11.58)      | 0.09 (0.03, 0.15)    | < 0.01 |



|                                                      |             |              |                   |        |
|------------------------------------------------------|-------------|--------------|-------------------|--------|
| Any other ambulatory visit; mean (sd)                | 0.43 (4.37) | 0.40 (3.46)  | 0.03 (0.01, 0.05) | < 0.01 |
| CCI Combined Comorbidity Score (180 days); mean (sd) | 0.01 (1.09) | -0.02 (1.09) | 0.03 (0.02, 0.03) | < 0.01 |
| Any IS event, including 3-day minimum; mean (sd)     | 0.07 (1.42) | 0.06 (1.13)  | 0.01 (0.00, 0.02) | < 0.01 |

**Table 11:** Details of patient population in propensity score matched cohort

The table below displays risks by exposure status and risk ratio and risk difference estimates, without confounder adjustment after 1:1 propensity score matching.

| Parameter                                                 | Use of beta blocker | Use of lisinopril |
|-----------------------------------------------------------|---------------------|-------------------|
| Number of patients                                        | 276,223             | 276,223           |
| Number of events                                          | 22                  | 56                |
| Risk per 1,000 patients                                   | 0.08                | 0.20              |
| Risk ratio (vs. referent; 95% CI)                         | Referent            | 2.55 (1.55, 4.17) |
| Risk difference per 1,000 patients (vs. referent; 95% CI) | Referent            | 0.12 (0.06, 0.19) |

**Table 12:** Summary of basic risk parameters in the propensity score matched cohort

The table below displays event rates by exposure status and rate ratio and rate difference estimates, without confounder adjustment after 1:1 propensity score matching.

| Parameter                                                     | Use of beta blocker | Use of lisinopril |
|---------------------------------------------------------------|---------------------|-------------------|
| Number of patients                                            | 276,223             | 276,223           |
| Number of person-years                                        | 131,544             | 137,094           |
| Number of events                                              | 22                  | 56                |
| Rate per 1,000 person-years                                   | 0.17                | 0.41              |
| Rate ratio (vs. referent; 95% CI)                             | Referent            | 2.44 (1.49, 4.00) |
| Rate difference per 1,000 person-years (vs. referent; 95% CI) | Referent            | 0.24 (0.11, 0.37) |

**Table 13:** Summary of basic rate parameters in the propensity score matched cohort

### *Details of Outcome Models*

The following sections detail the regression models used in each analysis. Regression coefficients, confidence intervals and *p*-values are displayed for all regression parameters.

#### Primary Analysis Outcome Model Details

| Variable          | Hazard Ratio      | p      |
|-------------------|-------------------|--------|
| Use of lisinopril | 1.75 (1.20, 2.55) | < 0.01 |

**Table 14:** Unadjusted Cox proportional hazards model

| Variable          | Hazard Ratio      | p      |
|-------------------|-------------------|--------|
| Use of lisinopril | 1.75 (1.20, 2.55) | < 0.01 |

**Table 15:** Multivariate Cox proportional hazards model adjusted by basic covariates

| Variable                                     | Hazard Ratio              | p      |
|----------------------------------------------|---------------------------|--------|
| Use of lisinopril                            | 2.34 (1.55, 3.52)         | < 0.01 |
| Age                                          | 0.99 (0.95, 1.04)         | 0.67   |
| Age Categories/<18                           | N/A (Missing factor)      | -      |
| Age Categories/18-44                         | 0.57 (0.18, 1.76)         | 0.33   |
| Age Categories/45-54                         | 0.57 (0.31, 1.07)         | 0.08   |
| Age Categories/>65                           | 0.83 (0.36, 1.92)         | 0.66   |
| Gender/Female                                | 1.01 (0.68, 1.48)         | 0.98   |
| Gender/Unknown                               | 0.01 (< 0.001, > 999.999) | 0.98   |
| Occurrence of allergic reaction              | 1.32 (0.73, 2.38)         | 0.36   |
| Occurrence of diabetes                       | 1.14 (0.72, 1.81)         | 0.57   |
| Occurrence of heart failure                  | 1.33 (0.44, 4.05)         | 0.61   |
| Occurrence of ischemic heart disease         | 2.38 (1.40, 4.04)         | < 0.01 |
| Use of NSAID                                 | 1.87 (1.14, 3.07)         | 0.01   |
| Generic drug                                 | 1.00 (0.91, 1.10)         | 0.98   |
| Use of any drug                              | 0.99 (0.96, 1.02)         | 0.49   |
| Any inpatient visit                          | 1.19 (0.99, 1.43)         | 0.07   |
| Any ED visit                                 | 1.02 (0.96, 1.09)         | 0.50   |
| Any ambulatory visit (without inpatient POS) | 1.00 (0.99, 1.02)         | 0.44   |
| Any other ambulatory visit                   | 0.97 (0.90, 1.05)         | 0.48   |
| CCI Combined Comorbidity Score (180 days)    | 1.19 (1.05, 1.35)         | < 0.01 |
| Any IS event, including 3-day minimum        | 0.30 (0.01, 9.31)         | 0.50   |

**Table 16:** Multivariate Cox proportional hazards model adjusted by all covariates

| Variable          | Hazard Ratio      | p      |
|-------------------|-------------------|--------|
| Use of lisinopril | 2.45 (1.50, 4.01) | < 0.01 |

**Table 17:** Multivariate Cox proportional hazards model adjusted by deciles of propensity score

## *Diagnostcs*

### Primary Analysis Model Diagnostcs

The following section describes diagnostcs for the outcome models. Values include the c-statistic, Akaike information criterion (AIC), and goodness-of-fit p-values.<sup>23</sup>

The following table shows model diagnostics for the outcome model adjusted by all covariates.

| Parameter          | Value    |
|--------------------|----------|
| Model Type         | Cox      |
| Convergence Status | OK       |
| c-statistic        | -        |
| AIC                | 2,783.74 |
| g.o.f. p-value     | -        |

**Table 18:** Model diagnostics for Cox proportional hazards model adjusted by all covariates

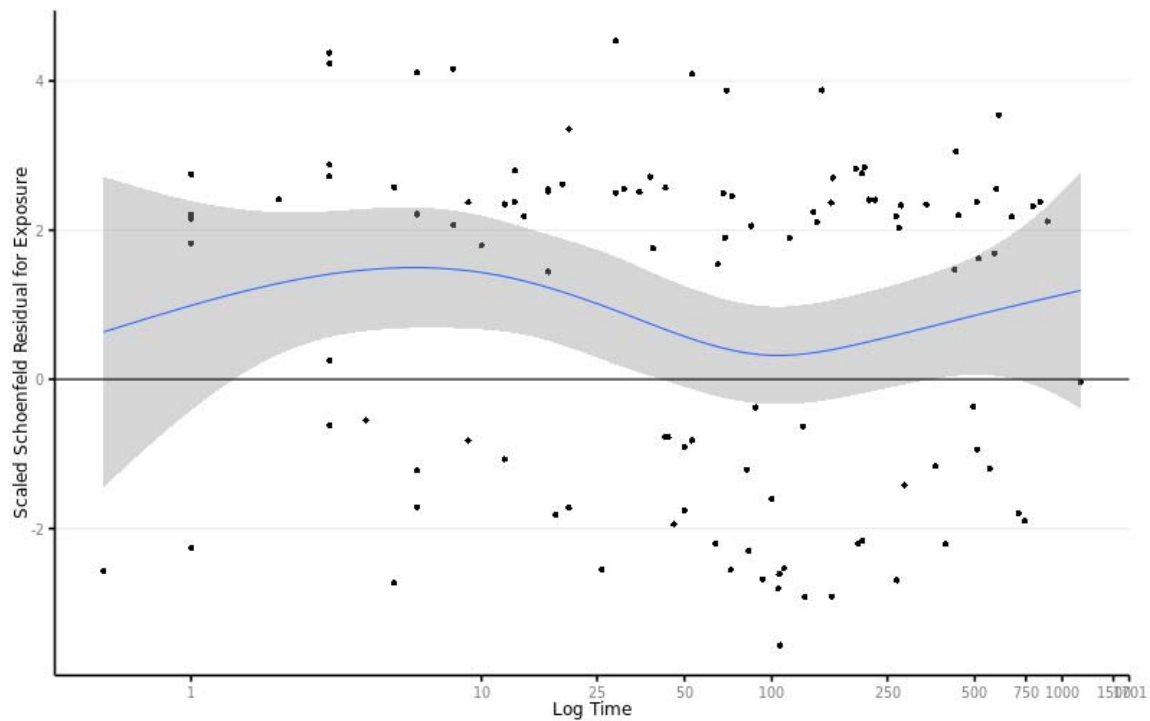

**Figure 2:** Schoenfeld Residual Plot

### Primary Analysis Propensity Score Model Diagnostics

This section describes diagnostics for the propensity scores. Key diagnostics are overlap of the propensity scores before matching, differences among individual confounders post-matching (see earlier results section), and a post-matching c-statistic to inspect balance across all confounders jointly. Ideal post-matching confounder differences are close to zero; ideal post-matching c-statistics are close to 0.5.<sup>17,24</sup>

The following figure displays the propensity score overlap prior to matching. Propensity score overlap is an important diagnostic for whether the use of propensity scores is appropriate for the analytic case at hand. The x-axis shows the range of propensity scores (0 to 1), and the y-axis shows the density of patients. The vertical lines indicate the trimming boundaries, which are the 2.5th percentile of propensity score in the exposed group and the 97.5th percentile of propensity score in the referent group; the red areas indicate patients who would be trimmed in a trimmed propensity score analysis. Generally speaking, patients in the referent group should tend to have lower propensity scores, while those in the exposure group should have higher propensity scores. If only a small proportion of patients are captured in the region of overlap between the exposure-specific propensity scores the appropriateness of the comparison group needs to be questioned or the possibility that a factor resembling an instrumental variable was included in the propensity score model should be explored.[Walker J Clin Epi 2013]

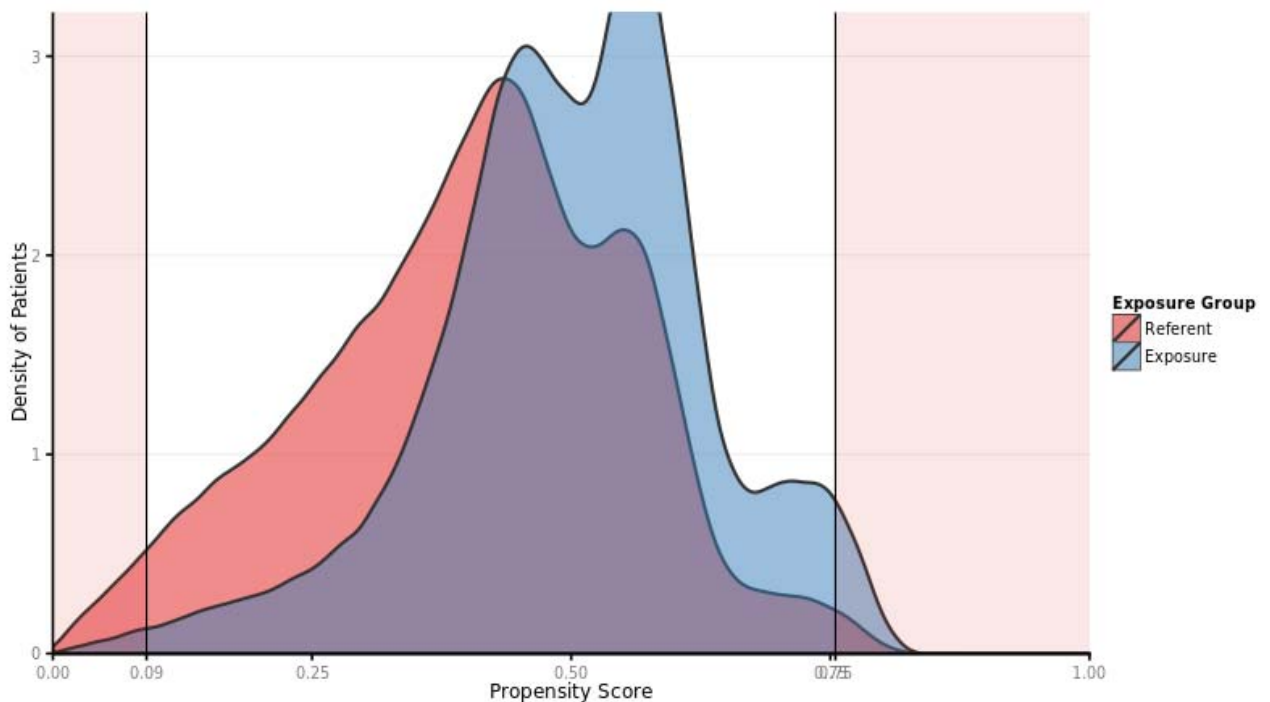

**Figure 3:** Pre-matching propensity score overlap

The following figure displays the propensity score overlap after matching. After 1:1 matching, the curves in the plot below should be nearly overlapping. If variable ratio matching is used, the height of the curves may vary.

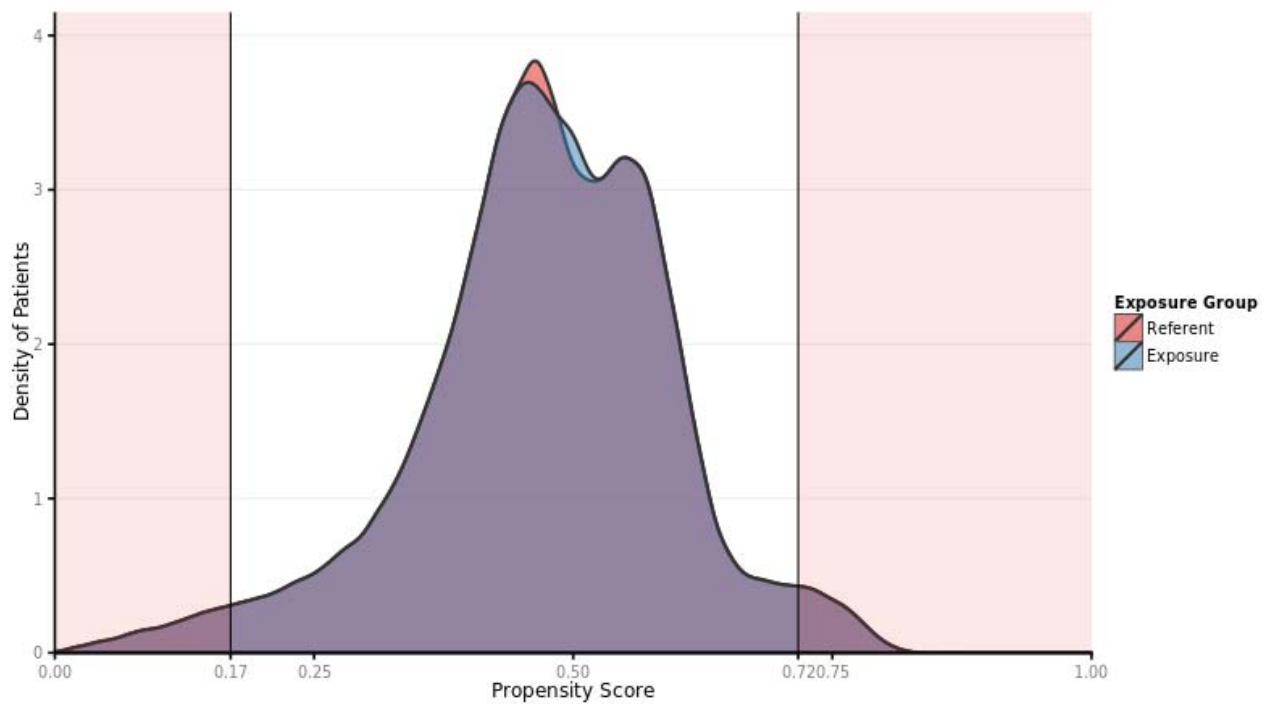

**Figure 4:** Post-matching propensity score overlap

The following table displays absolute standardized differences between the exposed and referent groups for all confounders, as measured in the unmatched and propensity score-matched cohorts. Smaller differences indicate more balance among confounders. Austin suggests that absolute standardized differences of  $<0.1$  indicate sufficient balance for confounding control.[Austin Stat Med 2009]

| Variable                                     | Abs. Std. Diff.<br>(Unmatched) | Abs. Std. Diff.<br>(Matched) | Change | Change<br>(%) |
|----------------------------------------------|--------------------------------|------------------------------|--------|---------------|
| Age                                          | 0.023                          | 0.035                        | 0.012  | 53.1%         |
| Age Categories                               | 0.238                          | 0.041                        | -0.198 | -82.9%        |
| Gender                                       | 0.240                          | 0.027                        | -0.213 | -88.8%        |
| Occurrence of allergic reaction              | 0.054                          | 0.009                        | -0.045 | -83.8%        |
| Occurrence of diabetes                       | 0.212                          | 0.005                        | -0.206 | -97.6%        |
| Occurrence of heart failure                  | 0.120                          | 0.019                        | -0.101 | -84.2%        |
| Occurrence of ischemic heart disease         | 0.342                          | 0.022                        | -0.320 | -93.6%        |
| Use of NSAID                                 | 0.025                          | 0.007                        | -0.017 | -69.7%        |
| Generic drug                                 | 0.252                          | 0.007                        | -0.245 | -97.3%        |
| Use of any drug                              | 0.220                          | 0.002                        | -0.219 | -99.3%        |
| Any inpatient visit                          | 0.264                          | 0.016                        | -0.248 | -94.0%        |
| Any ED visit                                 | 0.035                          | 0.006                        | -0.029 | -83.9%        |
| Any ambulatory visit (without inpatient POS) | 0.219                          | 0.008                        | -0.210 | -96.3%        |
| Any other ambulatory visit                   | 0.049                          | 0.008                        | -0.041 | -83.0%        |
| CCI Combined Comorbidity Score (180 days)    | 0.288                          | 0.026                        | -0.262 | -91.0%        |
| Any IS event, including 3-day minimum        | 0.052                          | 0.007                        | -0.045 | -86.4%        |

**Table 19:** Absolute standardized confounder differences as measured in the unmatched and propensity score-matched cohorts

| Variable                                     | Odds Ratio           | p      |
|----------------------------------------------|----------------------|--------|
| Age                                          | 1.03 (1.03, 1.03)    | < 0.01 |
| Age Categories/<18                           | N/A (Missing factor) | -      |
| Age Categories/18-44                         | 1.60 (1.55, 1.64)    | < 0.01 |
| Age Categories/45-54                         | 1.48 (1.46, 1.51)    | < 0.01 |
| Age Categories/>65                           | 0.58 (0.57, 0.60)    | < 0.01 |
| Gender/Female                                | 0.63 (0.62, 0.63)    | < 0.01 |
| Gender/Unknown                               | 0.72 (0.38, 1.36)    | 0.31   |
| Occurrence of allergic reaction              | 1.03 (1.01, 1.05)    | < 0.01 |
| Occurrence of diabetes                       | 2.37 (2.34, 2.40)    | < 0.01 |
| Occurrence of heart failure                  | 0.74 (0.70, 0.79)    | < 0.01 |
| Occurrence of ischemic heart disease         | 0.26 (0.25, 0.26)    | < 0.01 |
| Use of NSAID                                 | 1.14 (1.12, 1.16)    | < 0.01 |
| Generic drug                                 | 0.96 (0.96, 0.97)    | < 0.01 |
| Use of any drug                              | 0.99 (0.99, 0.99)    | < 0.01 |
| Any inpatient visit                          | 0.76 (0.75, 0.77)    | < 0.01 |
| Any ED visit                                 | 0.99 (0.99, 1.00)    | < 0.01 |
| Any ambulatory visit (without inpatient POS) | 0.99 (0.99, 1.00)    | < 0.01 |
| Any other ambulatory visit                   | 1.01 (1.00, 1.01)    | < 0.01 |
| CCI Combined Comorbidity Score (180 days)    | 0.87 (0.87, 0.88)    | < 0.01 |
| Any IS event, including 3-day minimum        | 1.01 (1.01, 1.02)    | < 0.01 |

**Table 20:** Propensity score model estimated by logistic regression

---

## STROBE CHECKLIST

The following checklist summarizes The Strengthening the Reporting of Observational Studies in Epidemiology (STROBE) elements and where those elements can be found in this report.<sup>2,25</sup>



| Item | Heading            | Summary of STROBE Recommendation                             | Section(s)                                  |
|------|--------------------|--------------------------------------------------------------|---------------------------------------------|
| 1a   | Title and Abstract | Indicate study design                                        | Title of Report                             |
| 1b   |                    | Provide informative abstract                                 | n/a                                         |
| 2    | Background         | Explain background and rationale                             | <a href="#">Link</a>                        |
| 3    |                    | State objectives and hypotheses                              | -                                           |
| 4    | Study Design       | Present key elements early                                   | <a href="#">Link</a>                        |
| 5    | Setting            | Describe setting                                             | <a href="#">Link</a> , <a href="#">Link</a> |
| 6a   | Cohort Study       | Eligibility criteria, follow-up                              | <a href="#">Link</a> , <a href="#">Link</a> |
| 6b   |                    | Matching criteria and number matched                         | <a href="#">Link</a>                        |
| 7    | Variables          | Define all variables                                         | <a href="#">Link</a> , <a href="#">Link</a> |
| 8    | Measurement        | Define measurement of each variable                          | <a href="#">Link</a>                        |
| 9    | Bias               | Define methods to mitigate bias                              | <a href="#">Link</a> , <a href="#">Link</a> |
| 10   | Study size         | Explain study size                                           | <a href="#">Link</a>                        |
| 11   | Quant. Variables   | Explain quantitative variables                               | <a href="#">Link</a>                        |
| 12a  | Stat. Methods      | Describe statistical methods                                 | <a href="#">Link</a>                        |
| 12b  |                    | Describe subgroup analyses                                   | <a href="#">Link</a>                        |
| 12c  |                    | Explain handling of missing data                             | <a href="#">Link</a>                        |
| 12d  |                    | Explain handling of loss to follow-up                        | <a href="#">Link</a>                        |
| 12e  |                    | Describe sensitivity analyses                                | <a href="#">Link</a>                        |
| 13a  | Participants       | Report number of patients at each stage                      | <a href="#">Link</a>                        |
| 13b  |                    | Give reason for exclusion                                    | <a href="#">Link</a>                        |
| 13c  |                    | Flow diagram                                                 | <a href="#">Link</a>                        |
| 14a  | Descriptive data   | Give characteristics of patients                             | <a href="#">Link</a>                        |
| 14b  |                    | Indicate missing data                                        | <a href="#">Link</a>                        |
| 14c  |                    | Summarize follow-up time                                     | <a href="#">Link</a>                        |
| 15   | Outcome data       | Report number of outcome events                              | <a href="#">Link</a>                        |
| 16a  | Main results       | Report the numbers of individuals at each stage of the study | <a href="#">Link</a>                        |

|     |                |                                                                                                      |                      |
|-----|----------------|------------------------------------------------------------------------------------------------------|----------------------|
| 16b |                | Give reasons for non-participation at each stage                                                     | <a href="#">Link</a> |
| 16c |                | Consider use of a flow diagram                                                                       | <a href="#">Link</a> |
| 17  | Other analyses | Report other analyses done, such as analyses of subgroups and interactions, and sensitivity analyses | <a href="#">Link</a> |
| 18  | Discussion     | Key results                                                                                          | -                    |
| 19  |                | Discuss limitations of the study                                                                     | -                    |
| 20  |                | Give a cautious overall interpretation of results                                                    | -                    |
| 21  |                | Discuss the generalisability (external validity) of the study results                                | -                    |
| 22  | Funding        | Give the source of funding and the role of the funders for the present study                         | -                    |

---

## APPENDIX: VARIABLE DEFINITIONS

### Exposure Group Definitions

#### *Use of beta blocker*

Users of **Use of beta blocker** with no prior use of **Use of beta blocker OR lisinopril (for new use exclusion)** with a washout period of 183 days. For the purposes of identifying potential qualifying cohort entry dates, exposure periods are combined into episodes using a grace period of 30 days and risk period of 30 days.

#### *Use of lisinopril*

Users of **Use of lisinopril** with no prior use of **Use of beta blocker OR lisinopril (for new use exclusion)** with a washout period of 183 days. For the purposes of identifying potential qualifying cohort entry dates, exposure periods are combined into episodes using a grace period of 30 days and risk period of 30 days.

### Exclusion Criteria Definitions

#### *Age*

**Age** measured over the time period beginning on the start of all available data, and ending one day prior to the cohort entry date. The aggregation used is to take the last value in the time period. The exclusion criterion will trigger if the value is missing.

#### *Age*

**Age** measured over the time period beginning on the start of all available data, and ending one day prior to the cohort entry date. The aggregation used is to take the last value in the time period. The exclusion criterion will trigger if the value is less than 18.0.

#### *Change in gender*

**Change in gender** measured over the time period beginning on the start of all available data, and ending one day prior to the cohort entry date. The aggregation used is to set to true if this flag was ever true.

#### *Occurrence of angioedema (ambulatory)*

**Occurrence of angioedema (ambulatory)** measured over the time period beginning 183 days prior to the cohort entry date, and ending one day prior to the cohort entry date. The aggregation used is to set to true if this event ever occurred.

### *Occurrence of angioedema (inpatient)*

**Occurrence of angioedema (inpatient)** measured over the time period beginning 183 days prior to the cohort entry date, and ending one day prior to the cohort entry date. The aggregation used is to set to true if this event ever occurred.

### *Use of beta blocker OR lisinopril (for new use exclusion)*

**Use of beta blocker OR lisinopril (for new use exclusion)** measured over the time period beginning 183 days prior to the cohort entry date, and ending one day prior to the cohort entry date. The aggregation used is to set to true if this flag was ever true.

## **Other Baseline Covariate Definitions**

### *Age*

**Age** measured over the default covariate assessment period. The aggregation used is to take the last value in the time period. Missing data will be handled for this covariate using complete case.

### *Age Categories*

**Age Categories** measured over the default covariate assessment period. The aggregation used is to take the last value in the time period. Missing data will be handled for this covariate using complete case.

### *Gender*

**Gender** measured over the default covariate assessment period. The aggregation used is to take the last value in the time period. Missing data will be handled for this covariate using complete case.

### *Occurrence of allergic reaction*

**Occurrence of allergic reaction** measured over the default covariate assessment period. The aggregation used is to set to true if this event ever occurred. Missing data will be handled for this covariate using complete case.

### *Occurrence of diabetes*

**Occurrence of diabetes** measured over the default covariate assessment period. The aggregation used is to set to true if this event ever occurred. Missing data will be handled for this covariate using complete case.

### *Occurrence of heart failure*

**Occurrence of heart failure** measured over the default covariate assessment period. The aggregation used is to set to true if this event ever occurred. Missing data will be handled for this covariate using complete case.

### *Occurrence of ischemic heart disease*

**Occurrence of ischemic heart disease** measured over the default covariate assessment period. The aggregation used is to set to true if this event ever occurred. Missing data will be handled for this covariate using complete case.

### *Use of NSAID*

**Use of NSAID** measured over the default covariate assessment period. The aggregation used is to set to true if this event ever occurred. Missing data will be handled for this covariate using complete case.

### *Generic drug*

**Generic drug** measured over the default covariate assessment period. The aggregation used is to count the number of unique values in the time period. Missing data will be handled for this covariate using complete case.

### *Use of any drug*

**Use of any drug** measured over the default covariate assessment period. The aggregation used is to count the number of events that occurred. Missing data will be handled for this covariate using complete case.

### *Any inpatient visit*

**Any inpatient visit** measured over the default covariate assessment period. The aggregation used is to count the number of events that occurred. Missing data will be handled for this covariate using complete case.

### *Any ED visit*

**Any ED visit** measured over the default covariate assessment period. The aggregation used is to count the number of days in which this event occurred. Missing data will be handled for this covariate using complete case.

### *Any ambulatory visit (without inpatient POS)*

**Any ambulatory visit (without inpatient POS)** measured over the default covariate assessment period. The aggregation used is to count the number of days in which this event occurred. Missing data will be handled for this covariate using complete case.

### *Any other ambulatory visit*

**Any other ambulatory visit** measured over the default covariate assessment period. The aggregation used is to count the number of days in which this event occurred. Missing data will be handled for this covariate using complete case.

### *CCI Combined Comorbidity Score (180 days)*

**CCI Combined Comorbidity Score (180 days)** measured over the time period beginning one day prior to the cohort entry date, and ending one day prior to the cohort entry date. The aggregation used is to take the last value in the time period. Missing data will be handled for this covariate using complete case.

### *Any IS event, including 3-day minimum*

**Any IS event, including 3-day minimum** measured over the default covariate assessment period. The aggregation used is to count the number of events that occurred. Missing data will be handled for this covariate using complete case.

## **Outcome Definitions**

Outcomes were:

### *Occurrence of angioedema (inpatient)*

**Occurrence of angioedema (inpatient)** measured over the time period beginning on the start of the follow-up period, and ending on the end of the follow-up period. The aggregation used is to set to true if this event started.

## **Measure Definitions**

### *Age*

This is a built-in patient attribute.

### *CCI Combined Comorbidity Score (180 days)*

This measure computes a score by summing over the following components:

- If the event **CCI Congestive heart failure**
  - Occurs within 180 days, set the score to 2.0
  - Otherwise, set the score to 0.0
- If the event **CCI Peripheral vascular disease**
  - Occurs within 180 days, set the score to 1.0
  - Otherwise, set the score to 0.0
- If the event **CCI Dementia**
  - Occurs within 180 days, set the score to 2.0
  - Otherwise, set the score to 0.0
- If the event **CCI Chronic pulmonary disease**

- Occurs within 180 days, set the score to 1.0
  - Otherwise, set the score to 0.0
- **If the event CCI Hemiplegia**
  - Occurs within 180 days, set the score to 1.0
  - Otherwise, set the score to 0.0
- **If the event CCI Renal failure**
  - Occurs within 180 days, set the score to 2.0
  - Otherwise, set the score to 0.0
- **If the event CCI Diabetes with complications**
  - Occurs within 180 days, set the score to 1.0
  - Otherwise, set the score to 0.0
- **If the event CCI Malignancy component**
  - Occurs within 180 days, set the score to 1.0
  - Otherwise, set the score to 0.0
- **If the event CCI Metastatic cancer**
  - Occurs within 180 days, set the score to 5.0
  - Otherwise, set the score to 0.0
- **If the event CCI Cardiac arrhythmias**
  - Occurs within 180 days, set the score to 1.0
  - Otherwise, set the score to 0.0
- **If the event CCI Pulmonary circulation disorders**
  - Occurs within 180 days, set the score to 1.0
  - Otherwise, set the score to 0.0
- **If the event CCI Coagulopathy**
  - Occurs within 180 days, set the score to 1.0
  - Otherwise, set the score to 0.0
- **If the event CCI Weight loss**
  - Occurs within 180 days, set the score to 2.0
  - Otherwise, set the score to 0.0
- **If the event CCI Fluid and electrolyte disorders**
  - Occurs within 180 days, set the score to 1.0
  - Otherwise, set the score to 0.0
- **If the event CCI Deficiency anemias**

- Occurs within 180 days, set the score to 1.0
  - Otherwise, set the score to 0.0
- **If the event [CCI Alcohol abuse](#)**
  - Occurs within 180 days, set the score to 1.0
  - Otherwise, set the score to 0.0
- **If the event [CCI Psychosis](#)**
  - Occurs within 180 days, set the score to 1.0
  - Otherwise, set the score to 0.0
- **If the event [CCI Liver disease](#)**
  - Occurs within 180 days, set the score to 1.0
  - Otherwise, set the score to 0.0
- **If the event [CCI HIV/AIDS](#)**
  - Occurs within 180 days, set the score to -1.0
  - Otherwise, set the score to 0.0
- **If the event [CCI Hypertension](#)**
  - Occurs within 180 days, set the score to -1.0
  - Otherwise, set the score to 0.0

### *Change in gender*

This measure detects changes in values of [Gender](#). The measure is true whenever there is a change from any category value to another.

### *Any IS event, including 3-day minimum*

This measure was defined as matching any of the following groups:

#### **1. New Definition**

- 1.1. The occurrence of [Any IS event \(Basic Claims\)](#).

#### **2. New Definition**

- 2.1. [Any IS event \(POS 50-65\)](#) occurring for at least 3 days.

### *Age Categories*

This measure categorizes [Age](#) into the following categories:



- **<18**: Up to 18.0 (exclusive).
- **18-44**: From 18.0 (inclusive) to 45.0 (exclusive).
- **45-54**: From 45.0 (inclusive) to 55.0 (exclusive).
- **55-64**: From 55.0 (inclusive) to 65.0 (exclusive). *This is the referent category.*
- **>65**: From 65.0 (inclusive) to (any).

#### *Any ED visit*

This event measure was defined as occurring when any of the following criteria were met:

- The occurrence of **Medical Services** with the following attributes:
  - **Place of Service Code (any position)** is any of:
    - EMERGENCY ROOM
    - AMBULANCE - LAND
    - AMBULANCE - AIR OR WATER

#### *Any ambulatory visit (without inpatient POS)*

This event measure was defined as occurring when any of the following criteria were met:

- The occurrence of **Medical Services** with the following attributes:
  - **Place of Service Code (any position)** is any of:

- PHARMACY
- SCHOOL
- HOMELESS SHELTER
- OFFICE
- HOME
- MOBILE UNIT
- WALK-IN RETAIL HEALTH CLINIC
- LOCATION WHERE THE PATIENT IS EMPLOYED
- URGENT CARE FACILITY
- AMBULATORY SURGICAL CENTER
- BIRTHING CENTER
- INDEPENDENT CLINIC
- FEDERALLY QUALIFIED HEALTH CENTER
- PSYCHIATRIC FACILITY PARTIAL HOSPITALIZATION
- COMMUNITY MENTAL HEALTH CENTER
- INTERMEDIATE CARE FACILITY FOR MENTALLY RETARDED
- RESIDENTIAL SUBSTANCE ABUSE TREATMENT FACILITY
- PSYCHIATRIC RESIDENTIAL TREATMENT FACILITY
- NON-RESIDENTIAL SUBSTANCE ABUSE TREATMENT FACILITY
- MASS IMMUNIZATION CENTER
- COMPREHENSIVE OUTPATIENT REHABILITATION FACILITY
- END-STAGE RENAL DISEASE TREATMENT FACILITY
- STATE OR LOCAL PUBLIC HEALTH CLINIC
- RURAL HEALTH CLINIC
- INDEPENDENT LABORATORY
- OUTPATIENT HOSPITAL

*Any inpatient visit*

This event measure was defined as occurring when any of the following criteria were met:

- The occurrence of **Inpatient Confinement** with the following attributes:
  - **Place of Service Code (any position)** is not any of:
    - SKILLED NURSING FACILITY
    - NURSING FACILITY
    - CUSTODIAL CARE FACILITY
    - HOSPICE

*Any other ambulatory visit*

This event measure was defined as occurring when any of the following criteria were met:

- The occurrence of **Medical Services** with the following attributes:
  - **Place of Service Code (any position)** is any of:

- OTHER UNLISTED FACILITY
- NO POS
- UNKNOWN POS

### *Generic drug*

This measure combines the values from the following attributes:

- **NDC Generic Name** in **Use of any drug**

### *Occurrence of allergic reaction*

This event measure was defined as occurring when any of the following criteria were met:

- The occurrence of **Inpatient Confinement** with the following attributes:
  - **ICD-9 Diagnosis Code (any position)** is any of: { 518.6, 558.3, 995.0, 995.27, 995.3, 995.7, V07.1, V13.81, V72.7, 477.0, 477.1, 477.2, 477.8, 477.9, 691.0, 691.8, 692.70, 692.71, 692.72, 692.73, 692.74, 692.79, 692.81, 692.82, 692.83, 692.84, 692.89, 693.0, 693.1, 693.8, 693.9, 708.0, 708.1, 708.2, 708.3, 708.4, 708.5, 708.8, 708.9, 995.6, 995.60, 995.61, 995.62, 995.63, 995.64, 995.65, 995.66, 995.67, 995.68, 995.69, V14.0, V14.1, V14.2, V14.3, V14.4, V14.5, V14.6, V14.7, V14.8, V14.9, V15.01, V15.02, V15.03, V15.04, V15.05, V15.06, V15.07, V15.08, V15.09 }

- 518.6 - ALLERGIC BRONCHOPULMONARY ASPERGILLIOSIS
- 558.3 - ALLERGIC GASTROENTERITIS AND COLITIS
- 995.0 - OTHER ANAPHYLACTIC REACTION
- 995.27 - OTHER DRUG ALLERGY
- 995.3 - ALLERGY UNSPECIFIED NOT ELSEWHERE CLASSIFIED
- 995.7 - OTHER ADVERSE FOOD REACTIONS NOT ELSEWHERE CLASSIFIED
- V07.1 - NEED FOR DESENSITIZATION TO ALLERGENS
- V13.81 - PERSONAL HISTORY OF ANAPHYLAXIS
- V72.7 - DIAGNOSTIC SKIN AND SENSITIZATION TESTS
- 477.0 - ALLERGIC RHINITIS DUE TO POLLEN
- 477.1 - ALLERGIC RHINITIS DUE TO FOOD
- 477.2 - ALLERGIC RHINITIS DUE TO ANIMAL (CAT) (DOG) HAIR AND DANDER
- 477.8 - ALLERGIC RHINITIS DUE TO OTHER ALLERGEN
- 477.9 - ALLERGIC RHINITIS CAUSE UNSPECIFIED
- 691.0 - DIAPER OR NAPKIN RASH
- 691.8 - OTHER ATOPIC DERMATITIS AND RELATED CONDITIONS
- 692.70 - UNSPECIFIED DERMATITIS DUE TO SUN
- 692.71 - SUNBURN
- 692.72 - ACUTE DERMATITIS DUE TO SOLAR RADIATION
- 692.73 - ACTINIC RETICULOID AND ACTINIC GRANULOMA
- 692.74 - OTHER CHRONIC DERMATITIS DUE TO SOLAR RADIATION
- 692.79 - OTHER DERMATITIS DUE TO SOLAR RADIATION
- 692.81 - DERMATITIS DUE TO COSMETICS
- 692.82 - DERMATITIS DUE TO OTHER RADIATION
- 692.83 - DERMATITIS DUE TO METALS
- 692.84 - DERMATITIS DUE TO ANIMAL (CAT) (DOG) DANDER
- 692.89 - CONTACT DERMATITIS AND OTHER ECZEMA DUE TO OTHER SPECIFIED AGENTS
- 693.0 - DERMATITIS DUE TO DRUGS AND MEDICINES TAKEN INTERNALLY
- 693.1 - DERMATITIS DUE TO FOOD TAKEN INTERNALLY
- 693.8 - DERMATITIS DUE TO OTHER SPECIFIED SUBSTANCES TAKEN INTERNALLY
- 693.9 - DERMATITIS DUE TO UNSPECIFIED SUBSTANCE TAKEN INTERNALLY
- 708.0 - ALLERGIC URTICARIA
- 708.1 - IDIOPATHIC URTICARIA
- 708.2 - URTICARIA DUE TO COLD AND HEAT
- 708.3 - DERMATOGRAPHIC URTICARIA
- 708.4 - VIBRATORY URTICARIA
- 708.5 - CHOLINERGIC URTICARIA
- 708.8 - OTHER SPECIFIED URTICARIA
- 708.9 - UNSPECIFIED URTICARIA
- 995.6 - ANAPHYLACTIC REACTION DUE TO FOOD
- 995.60 - ANAPHYLACTIC REACTION DUE TO UNSPECIFIED FOOD
- 995.61 - ANAPHYLACTIC REACTION DUE TO PEANUTS
- 995.62 - ANAPHYLACTIC REACTION DUE TO CRUSTACEANS
- 995.63 - ANAPHYLACTIC REACTION DUE TO FRUITS AND VEGETABLES
- 995.64 - ANAPHYLACTIC REACTION DUE TO TREE NUTS AND SEEDS

- 995.65 - ANAPHYLACTIC REACTION DUE TO FISH
  - 995.66 - ANAPHYLACTIC REACTION DUE TO FOOD ADDITIVES
  - 995.67 - ANAPHYLACTIC REACTION DUE TO MILK PRODUCTS
  - 995.68 - ANAPHYLACTIC REACTION DUE TO EGGS
  - 995.69 - ANAPHYLACTIC REACTION DUE TO OTHER SPECIFIED FOOD
  - V14.0 - PERSONAL HISTORY OF ALLERGY TO PENICILLIN
  - V14.1 - PERSONAL HISTORY OF ALLERGY TO OTHER ANTIBIOTIC AGENT
  - V14.2 - PERSONAL HISTORY OF ALLERGY TO SULFONAMIDES
  - V14.3 - PERSONAL HISTORY OF ALLERGY TO OTHER ANTI-INFECTIVE AGENT
  - V14.4 - PERSONAL HISTORY OF ALLERGY TO ANESTHETIC AGENT
  - V14.5 - PERSONAL HISTORY OF ALLERGY TO NARCOTIC AGENT
  - V14.6 - PERSONAL HISTORY OF ALLERGY TO ANALGESIC AGENT
  - V14.7 - PERSONAL HISTORY OF ALLERGY TO SERUM OR VACCINE
  - V14.8 - PERSONAL HISTORY OF ALLERGY TO OTHER SPECIFIED MEDICINAL AGENTS
  - V14.9 - PERSONAL HISTORY OF ALLERGY TO UNSPECIFIED MEDICINAL AGENT
  - V15.01 - PERSONAL HISTORY OF ALLERGY TO PEANUTS
  - V15.02 - PERSONAL HISTORY OF ALLERGY TO MILK PRODUCTS
  - V15.03 - PERSONAL HISTORY OF ALLERGY TO EGGS
  - V15.04 - PERSONAL HISTORY OF ALLERGY TO SEAFOOD
  - V15.05 - PERSONAL HISTORY OF ALLERGY TO OTHER FOODS
  - V15.06 - PERSONAL HISTORY OF ALLERGY TO INSECTS AND ARACHNIDS
  - V15.07 - PERSONAL HISTORY OF ALLERGY TO LATEX
  - V15.08 - PERSONAL HISTORY OF ALLERGY TO RADIOGRAPHIC DYE
  - V15.09 - PERSONAL HISTORY OF OTHER ALLERGY OTHER THAN TO MEDICINAL AGENTS
- The occurrence of **Medical Services** with the following attributes:
    - **ICD-9 Diagnosis Code (any position)** is any of: { 518.6, 558.3, 995.0, 995.27, 995.3, 995.7, V07.1, V13.81, V72.7, 477.0, 477.1, 477.2, 477.8, 477.9, 691.0, 691.8, 692.70, 692.71, 692.72, 692.73, 692.74, 692.79, 692.81, 692.82, 692.83, 692.84, 692.89, 693.0, 693.1, 693.8, 693.9, 708.0, 708.1, 708.2, 708.3, 708.4, 708.5, 708.8, 708.9, 995.6, 995.60, 995.61, 995.62, 995.63, 995.64, 995.65, 995.66, 995.67, 995.68, 995.69, V14.0, V14.1, V14.2, V14.3, V14.4, V14.5, V14.6, V14.7, V14.8, V14.9, V15.01, V15.02, V15.03, V15.04, V15.05, V15.06, V15.07, V15.08, V15.09 }

- 518.6 - ALLERGIC BRONCHOPULMONARY ASPERGILLIOSIS
- 558.3 - ALLERGIC GASTROENTERITIS AND COLITIS
- 995.0 - OTHER ANAPHYLACTIC REACTION
- 995.27 - OTHER DRUG ALLERGY
- 995.3 - ALLERGY UNSPECIFIED NOT ELSEWHERE CLASSIFIED
- 995.7 - OTHER ADVERSE FOOD REACTIONS NOT ELSEWHERE CLASSIFIED
- V07.1 - NEED FOR DESENSITIZATION TO ALLERGENS
- V13.81 - PERSONAL HISTORY OF ANAPHYLAXIS
- V72.7 - DIAGNOSTIC SKIN AND SENSITIZATION TESTS
- 477.0 - ALLERGIC RHINITIS DUE TO POLLEN
- 477.1 - ALLERGIC RHINITIS DUE TO FOOD
- 477.2 - ALLERGIC RHINITIS DUE TO ANIMAL (CAT) (DOG) HAIR AND DANDER
- 477.8 - ALLERGIC RHINITIS DUE TO OTHER ALLERGEN
- 477.9 - ALLERGIC RHINITIS CAUSE UNSPECIFIED
- 691.0 - DIAPER OR NAPKIN RASH
- 691.8 - OTHER ATOPIC DERMATITIS AND RELATED CONDITIONS
- 692.70 - UNSPECIFIED DERMATITIS DUE TO SUN
- 692.71 - SUNBURN
- 692.72 - ACUTE DERMATITIS DUE TO SOLAR RADIATION
- 692.73 - ACTINIC RETICULOID AND ACTINIC GRANULOMA
- 692.74 - OTHER CHRONIC DERMATITIS DUE TO SOLAR RADIATION
- 692.79 - OTHER DERMATITIS DUE TO SOLAR RADIATION
- 692.81 - DERMATITIS DUE TO COSMETICS
- 692.82 - DERMATITIS DUE TO OTHER RADIATION
- 692.83 - DERMATITIS DUE TO METALS
- 692.84 - DERMATITIS DUE TO ANIMAL (CAT) (DOG) DANDER
- 692.89 - CONTACT DERMATITIS AND OTHER ECZEMA DUE TO OTHER SPECIFIED AGENTS
- 693.0 - DERMATITIS DUE TO DRUGS AND MEDICINES TAKEN INTERNALLY
- 693.1 - DERMATITIS DUE TO FOOD TAKEN INTERNALLY
- 693.8 - DERMATITIS DUE TO OTHER SPECIFIED SUBSTANCES TAKEN INTERNALLY
- 693.9 - DERMATITIS DUE TO UNSPECIFIED SUBSTANCE TAKEN INTERNALLY
- 708.0 - ALLERGIC URTICARIA
- 708.1 - IDIOPATHIC URTICARIA
- 708.2 - URTICARIA DUE TO COLD AND HEAT
- 708.3 - DERMATOGRAPHIC URTICARIA
- 708.4 - VIBRATORY URTICARIA
- 708.5 - CHOLINERGIC URTICARIA
- 708.8 - OTHER SPECIFIED URTICARIA
- 708.9 - UNSPECIFIED URTICARIA
- 995.6 - ANAPHYLACTIC REACTION DUE TO FOOD
- 995.60 - ANAPHYLACTIC REACTION DUE TO UNSPECIFIED FOOD
- 995.61 - ANAPHYLACTIC REACTION DUE TO PEANUTS
- 995.62 - ANAPHYLACTIC REACTION DUE TO CRUSTACEANS
- 995.63 - ANAPHYLACTIC REACTION DUE TO FRUITS AND VEGETABLES
- 995.64 - ANAPHYLACTIC REACTION DUE TO TREE NUTS AND SEEDS

- 995.65 - ANAPHYLACTIC REACTION DUE TO FISH
- 995.66 - ANAPHYLACTIC REACTION DUE TO FOOD ADDITIVES
- 995.67 - ANAPHYLACTIC REACTION DUE TO MILK PRODUCTS
- 995.68 - ANAPHYLACTIC REACTION DUE TO EGGS
- 995.69 - ANAPHYLACTIC REACTION DUE TO OTHER SPECIFIED FOOD
- V14.0 - PERSONAL HISTORY OF ALLERGY TO PENICILLIN
- V14.1 - PERSONAL HISTORY OF ALLERGY TO OTHER ANTIBIOTIC AGENT
- V14.2 - PERSONAL HISTORY OF ALLERGY TO SULFONAMIDES
- V14.3 - PERSONAL HISTORY OF ALLERGY TO OTHER ANTI-INFECTIVE AGENT
- V14.4 - PERSONAL HISTORY OF ALLERGY TO ANESTHETIC AGENT
- V14.5 - PERSONAL HISTORY OF ALLERGY TO NARCOTIC AGENT
- V14.6 - PERSONAL HISTORY OF ALLERGY TO ANALGESIC AGENT
- V14.7 - PERSONAL HISTORY OF ALLERGY TO SERUM OR VACCINE
- V14.8 - PERSONAL HISTORY OF ALLERGY TO OTHER SPECIFIED MEDICINAL AGENTS
- V14.9 - PERSONAL HISTORY OF ALLERGY TO UNSPECIFIED MEDICINAL AGENT
- V15.01 - PERSONAL HISTORY OF ALLERGY TO PEANUTS
- V15.02 - PERSONAL HISTORY OF ALLERGY TO MILK PRODUCTS
- V15.03 - PERSONAL HISTORY OF ALLERGY TO EGGS
- V15.04 - PERSONAL HISTORY OF ALLERGY TO SEAFOOD
- V15.05 - PERSONAL HISTORY OF ALLERGY TO OTHER FOODS
- V15.06 - PERSONAL HISTORY OF ALLERGY TO INSECTS AND ARACHNIDS
- V15.07 - PERSONAL HISTORY OF ALLERGY TO LATEX
- V15.08 - PERSONAL HISTORY OF ALLERGY TO RADIOGRAPHIC DYE
- V15.09 - PERSONAL HISTORY OF OTHER ALLERGY OTHER THAN TO MEDICINAL AGENTS

*Occurrence of angioedema (ambulatory)*

This event measure was defined as occurring when any of the following criteria were met:

- The occurrence of **Medical Services** with the following attributes:
  - **Place of Service Code (any position)** is any of:

- PHARMACY
  - SCHOOL
  - HOMELESS SHELTER
  - OFFICE
  - HOME
  - MOBILE UNIT
  - WALK-IN RETAIL HEALTH CLINIC
  - LOCATION WHERE THE PATIENT IS EMPLOYED
  - URGENT CARE FACILITY
  - INPATIENT HOSPITAL
  - OUTPATIENT HOSPITAL
  - AMBULATORY SURGICAL CENTER
  - INDEPENDENT CLINIC
  - FEDERALLY QUALIFIED HEALTH CENTER
  - INPATIENT PSYCHIATRIC FACILITY
  - PSYCHIATRIC FACILITY PARTIAL HOSPITALIZATION
  - COMMUNITY MENTAL HEALTH CENTER
  - INTERMEDIATE CARE FACILITY FOR MENTALLY RETARDED
  - RESIDENTIAL SUBSTANCE ABUSE TREATMENT FACILITY
  - PSYCHIATRIC RESIDENTIAL TREATMENT FACILITY
  - NON-RESIDENTIAL SUBSTANCE ABUSE TREATMENT FACILITY
  - MASS IMMUNIZATION CENTER
  - COMPREHENSIVE INPATIENT REHABILITATION FACILITY
  - COMPREHENSIVE OUTPATIENT REHABILITATION FACILITY
  - END-STAGE RENAL DISEASE TREATMENT FACILITY
  - STATE OR LOCAL PUBLIC HEALTH CLINIC
  - RURAL HEALTH CLINIC
  - INDEPENDENT LABORATORY
- **ICD-9 Diagnosis Code (any position)** is any of: { 995.1 }
    - 995.1 - ANGIONEUROTIC EDEMA NOT ELSEWHERE CLASSIFIED

*Occurrence of angioedema (inpatient)*

This event measure was defined as occurring when any of the following criteria were met:

- The occurrence of **Inpatient Confinement** with the following attributes:
  - **ICD-9 Diagnosis Code (any position)** is any of: { 995.1 }
    - 995.1 - ANGIONEUROTIC EDEMA NOT ELSEWHERE CLASSIFIED
  - **Place of Service Code (any position)** is not any of:



- SKILLED NURSING FACILITY
- NURSING FACILITY
- CUSTODIAL CARE FACILITY
- HOSPICE

### *Occurrence of angioedema (inpatient)*

This event measure was defined as occurring when any of the following criteria were met:

- The occurrence of **Inpatient Confinement** with the following attributes:
  - **ICD-9 Diagnosis Code (any position)** is any of: { 995.1 }
    - 995.1 - ANGIONEUROTIC EDEMA NOT ELSEWHERE CLASSIFIED
- The occurrence of **Medical Services** with the following attributes:
  - **ICD-9 Diagnosis Code (any position)** is any of: { 995.1 }
    - 995.1 - ANGIONEUROTIC EDEMA NOT ELSEWHERE CLASSIFIED

Only events that occurred at the times that **Patient is Inpatient** was true were included.

### *Occurrence of diabetes*

This event measure was defined as occurring when any of the following criteria were met:

- The occurrence of **Inpatient Confinement** with the following attributes:
  - **ICD-9 Diagnosis Code (any position)** is any of: { 250, 250.0, 250.00, 250.01, 250.02, 250.03, 250.1, 250.10, 250.11, 250.12, 250.13, 250.2, 250.20, 250.21, 250.22, 250.23, 250.3, 250.30, 250.31, 250.32, 250.33, 250.4, 250.40, 250.41, 250.42, 250.43, 250.5, 250.50, 250.51, 250.52, 250.53, 250.6, 250.60, 250.61, 250.62, 250.63, 250.7, 250.70, 250.71, 250.72, 250.73, 250.8, 250.80, 250.81, 250.82, 250.83, 250.9, 250.90, 250.91, 250.92, 250.93 }

- 250 - DIABETES MELLITUS
- 250.0 - DIABETES MELLITUS WITHOUT MENTION OF COMPLICATION
- 250.00 - DIABETES MELLITUS WITHOUT MENTION OF COMPLICATION TYPE II OR UNSPECIFIED TYPE NOT STATED AS UNCONTROLLED
- 250.01 - DIABETES MELLITUS WITHOUT MENTION OF COMPLICATION TYPE I [JUVENILE TYPE] NOT STATED AS UNCONTROLLED
- 250.02 - DIABETES MELLITUS WITHOUT MENTION OF COMPLICATION TYPE II OR UNSPECIFIED TYPE UNCONTROLLED
- 250.03 - DIABETES MELLITUS WITHOUT MENTION OF COMPLICATION TYPE I [JUVENILE TYPE] UNCONTROLLED
- 250.1 - DIABETES WITH KETOACIDOSIS
- 250.10 - DIABETES WITH KETOACIDOSIS TYPE II OR UNSPECIFIED TYPE NOT STATED AS UNCONTROLLED
- 250.11 - DIABETES WITH KETOACIDOSIS TYPE I [JUVENILE TYPE] NOT STATED AS UNCONTROLLED
- 250.12 - DIABETES WITH KETOACIDOSIS TYPE II OR UNSPECIFIED TYPE UNCONTROLLED
- 250.13 - DIABETES WITH KETOACIDOSIS TYPE I [JUVENILE TYPE] UNCONTROLLED
- 250.2 - DIABETES WITH HYPEROSMOLARITY
- 250.20 - DIABETES WITH HYPEROSMOLARITY TYPE II OR UNSPECIFIED TYPE NOT STATED AS UNCONTROLLED
- 250.21 - DIABETES WITH HYPEROSMOLARITY TYPE I [JUVENILE TYPE] NOT STATED AS UNCONTROLLED
- 250.22 - DIABETES WITH HYPEROSMOLARITY TYPE II OR UNSPECIFIED TYPE UNCONTROLLED
- 250.23 - DIABETES WITH HYPEROSMOLARITY TYPE I [JUVENILE TYPE] UNCONTROLLED
- 250.3 - DIABETES WITH OTHER COMA
- 250.30 - DIABETES WITH OTHER COMA TYPE II OR UNSPECIFIED TYPE NOT STATED AS UNCONTROLLED
- 250.31 - DIABETES WITH OTHER COMA TYPE I [JUVENILE TYPE] NOT STATED AS UNCONTROLLED
- 250.32 - DIABETES WITH OTHER COMA TYPE II OR UNSPECIFIED TYPE UNCONTROLLED
- 250.33 - DIABETES WITH OTHER COMA TYPE I [JUVENILE TYPE] UNCONTROLLED
- 250.4 - DIABETES WITH RENAL MANIFESTATIONS
- 250.40 - DIABETES WITH RENAL MANIFESTATIONS TYPE II OR UNSPECIFIED TYPE NOT STATED AS UNCONTROLLED
- 250.41 - DIABETES WITH RENAL MANIFESTATIONS TYPE I [JUVENILE TYPE] NOT STATED AS UNCONTROLLED
- 250.42 - DIABETES WITH RENAL MANIFESTATIONS TYPE II OR UNSPECIFIED TYPE UNCONTROLLED
- 250.43 - DIABETES WITH RENAL MANIFESTATIONS TYPE I [JUVENILE TYPE] UNCONTROLLED
- 250.5 - DIABETES WITH OPHTHALMIC MANIFESTATIONS
- 250.50 - DIABETES WITH OPHTHALMIC MANIFESTATIONS TYPE II OR UNSPECIFIED TYPE NOT STATED AS UNCONTROLLED

- 250.51 - DIABETES WITH OPHTHALMIC MANIFESTATIONS TYPE I [JUVENILE TYPE] NOT STATED AS UNCONTROLLED
  - 250.52 - DIABETES WITH OPHTHALMIC MANIFESTATIONS TYPE II OR UNSPECIFIED TYPE UNCONTROLLED
  - 250.53 - DIABETES WITH OPHTHALMIC MANIFESTATIONS TYPE I [JUVENILE TYPE] UNCONTROLLED
  - 250.6 - DIABETES WITH NEUROLOGICAL MANIFESTATIONS
  - 250.60 - DIABETES WITH NEUROLOGICAL MANIFESTATIONS TYPE II OR UNSPECIFIED TYPE NOT STATED AS UNCONTROLLED
  - 250.61 - DIABETES WITH NEUROLOGICAL MANIFESTATIONS TYPE I [JUVENILE TYPE] NOT STATED AS UNCONTROLLED
  - 250.62 - DIABETES WITH NEUROLOGICAL MANIFESTATIONS TYPE II OR UNSPECIFIED TYPE UNCONTROLLED
  - 250.63 - DIABETES WITH NEUROLOGICAL MANIFESTATIONS TYPE I [JUVENILE TYPE] UNCONTROLLED
  - 250.7 - DIABETES WITH PERIPHERAL CIRCULATORY DISORDERS
  - 250.70 - DIABETES WITH PERIPHERAL CIRCULATORY DISORDERS TYPE II OR UNSPECIFIED TYPE NOT STATED AS UNCONTROLLED
  - 250.71 - DIABETES WITH PERIPHERAL CIRCULATORY DISORDERS TYPE I [JUVENILE TYPE] NOT STATED AS UNCONTROLLED
  - 250.72 - DIABETES WITH PERIPHERAL CIRCULATORY DISORDERS TYPE II OR UNSPECIFIED TYPE UNCONTROLLED
  - 250.73 - DIABETES WITH PERIPHERAL CIRCULATORY DISORDERS TYPE I [JUVENILE TYPE] UNCONTROLLED
  - 250.8 - DIABETES WITH OTHER SPECIFIED MANIFESTATIONS
  - 250.80 - DIABETES WITH OTHER SPECIFIED MANIFESTATIONS TYPE II OR UNSPECIFIED TYPE NOT STATED AS UNCONTROLLED
  - 250.81 - DIABETES WITH OTHER SPECIFIED MANIFESTATIONS TYPE I [JUVENILE TYPE] NOT STATED AS UNCONTROLLED
  - 250.82 - DIABETES WITH OTHER SPECIFIED MANIFESTATIONS TYPE II OR UNSPECIFIED TYPE UNCONTROLLED
  - 250.83 - DIABETES WITH OTHER SPECIFIED MANIFESTATIONS TYPE I [JUVENILE TYPE] UNCONTROLLED
  - 250.9 - DIABETES WITH UNSPECIFIED COMPLICATION
  - 250.90 - DIABETES WITH UNSPECIFIED COMPLICATION TYPE II OR UNSPECIFIED TYPE NOT STATED AS UNCONTROLLED
  - 250.91 - DIABETES WITH UNSPECIFIED COMPLICATION TYPE I [JUVENILE TYPE] NOT STATED AS UNCONTROLLED
  - 250.92 - DIABETES WITH UNSPECIFIED COMPLICATION TYPE II OR UNSPECIFIED TYPE UNCONTROLLED
  - 250.93 - DIABETES WITH UNSPECIFIED COMPLICATION TYPE I [JUVENILE TYPE] UNCONTROLLED
- The occurrence of **Medical Services** with the following attributes:
    - **ICD-9 Diagnosis Code (any position)** is any of: { 250, 250.0, 250.00, 250.01, 250.02, 250.03, 250.1, 250.10, 250.11, 250.12, 250.13, 250.2, 250.20, 250.21, 250.22, 250.23, 250.3, 250.30, 250.31, 250.32, 250.33, 250.4, 250.40, 250.41, 250.42, 250.43, 250.5, 250.50, 250.51, 250.52, 250.53, 250.6, 250.60, 250.61, 250.62,

250.63, 250.7, 250.70, 250.71, 250.72, 250.73, 250.8, 250.80, 250.81, 250.82,  
250.83, 250.9, 250.90, 250.91, 250.92, 250.93 }

- 250 - DIABETES MELLITUS
- 250.0 - DIABETES MELLITUS WITHOUT MENTION OF COMPLICATION
- 250.00 - DIABETES MELLITUS WITHOUT MENTION OF COMPLICATION TYPE II OR UNSPECIFIED TYPE NOT STATED AS UNCONTROLLED
- 250.01 - DIABETES MELLITUS WITHOUT MENTION OF COMPLICATION TYPE I [JUVENILE TYPE] NOT STATED AS UNCONTROLLED
- 250.02 - DIABETES MELLITUS WITHOUT MENTION OF COMPLICATION TYPE II OR UNSPECIFIED TYPE UNCONTROLLED
- 250.03 - DIABETES MELLITUS WITHOUT MENTION OF COMPLICATION TYPE I [JUVENILE TYPE] UNCONTROLLED
- 250.1 - DIABETES WITH KETOACIDOSIS
- 250.10 - DIABETES WITH KETOACIDOSIS TYPE II OR UNSPECIFIED TYPE NOT STATED AS UNCONTROLLED
- 250.11 - DIABETES WITH KETOACIDOSIS TYPE I [JUVENILE TYPE] NOT STATED AS UNCONTROLLED
- 250.12 - DIABETES WITH KETOACIDOSIS TYPE II OR UNSPECIFIED TYPE UNCONTROLLED
- 250.13 - DIABETES WITH KETOACIDOSIS TYPE I [JUVENILE TYPE] UNCONTROLLED
- 250.2 - DIABETES WITH HYPEROSMOLARITY
- 250.20 - DIABETES WITH HYPEROSMOLARITY TYPE II OR UNSPECIFIED TYPE NOT STATED AS UNCONTROLLED
- 250.21 - DIABETES WITH HYPEROSMOLARITY TYPE I [JUVENILE TYPE] NOT STATED AS UNCONTROLLED
- 250.22 - DIABETES WITH HYPEROSMOLARITY TYPE II OR UNSPECIFIED TYPE UNCONTROLLED
- 250.23 - DIABETES WITH HYPEROSMOLARITY TYPE I [JUVENILE TYPE] UNCONTROLLED
- 250.3 - DIABETES WITH OTHER COMA
- 250.30 - DIABETES WITH OTHER COMA TYPE II OR UNSPECIFIED TYPE NOT STATED AS UNCONTROLLED
- 250.31 - DIABETES WITH OTHER COMA TYPE I [JUVENILE TYPE] NOT STATED AS UNCONTROLLED
- 250.32 - DIABETES WITH OTHER COMA TYPE II OR UNSPECIFIED TYPE UNCONTROLLED
- 250.33 - DIABETES WITH OTHER COMA TYPE I [JUVENILE TYPE] UNCONTROLLED
- 250.4 - DIABETES WITH RENAL MANIFESTATIONS
- 250.40 - DIABETES WITH RENAL MANIFESTATIONS TYPE II OR UNSPECIFIED TYPE NOT STATED AS UNCONTROLLED
- 250.41 - DIABETES WITH RENAL MANIFESTATIONS TYPE I [JUVENILE TYPE] NOT STATED AS UNCONTROLLED
- 250.42 - DIABETES WITH RENAL MANIFESTATIONS TYPE II OR UNSPECIFIED TYPE UNCONTROLLED
- 250.43 - DIABETES WITH RENAL MANIFESTATIONS TYPE I [JUVENILE TYPE] UNCONTROLLED
- 250.5 - DIABETES WITH OPHTHALMIC MANIFESTATIONS
- 250.50 - DIABETES WITH OPHTHALMIC MANIFESTATIONS TYPE II OR UNSPECIFIED TYPE NOT STATED AS UNCONTROLLED

- 250.51 - DIABETES WITH OPHTHALMIC MANIFESTATIONS TYPE I [JUVENILE TYPE] NOT STATED AS UNCONTROLLED
- 250.52 - DIABETES WITH OPHTHALMIC MANIFESTATIONS TYPE II OR UNSPECIFIED TYPE UNCONTROLLED
- 250.53 - DIABETES WITH OPHTHALMIC MANIFESTATIONS TYPE I [JUVENILE TYPE] UNCONTROLLED
- 250.6 - DIABETES WITH NEUROLOGICAL MANIFESTATIONS
- 250.60 - DIABETES WITH NEUROLOGICAL MANIFESTATIONS TYPE II OR UNSPECIFIED TYPE NOT STATED AS UNCONTROLLED
- 250.61 - DIABETES WITH NEUROLOGICAL MANIFESTATIONS TYPE I [JUVENILE TYPE] NOT STATED AS UNCONTROLLED
- 250.62 - DIABETES WITH NEUROLOGICAL MANIFESTATIONS TYPE II OR UNSPECIFIED TYPE UNCONTROLLED
- 250.63 - DIABETES WITH NEUROLOGICAL MANIFESTATIONS TYPE I [JUVENILE TYPE] UNCONTROLLED
- 250.7 - DIABETES WITH PERIPHERAL CIRCULATORY DISORDERS
- 250.70 - DIABETES WITH PERIPHERAL CIRCULATORY DISORDERS TYPE II OR UNSPECIFIED TYPE NOT STATED AS UNCONTROLLED
- 250.71 - DIABETES WITH PERIPHERAL CIRCULATORY DISORDERS TYPE I [JUVENILE TYPE] NOT STATED AS UNCONTROLLED
- 250.72 - DIABETES WITH PERIPHERAL CIRCULATORY DISORDERS TYPE II OR UNSPECIFIED TYPE UNCONTROLLED
- 250.73 - DIABETES WITH PERIPHERAL CIRCULATORY DISORDERS TYPE I [JUVENILE TYPE] UNCONTROLLED
- 250.8 - DIABETES WITH OTHER SPECIFIED MANIFESTATIONS
- 250.80 - DIABETES WITH OTHER SPECIFIED MANIFESTATIONS TYPE II OR UNSPECIFIED TYPE NOT STATED AS UNCONTROLLED
- 250.81 - DIABETES WITH OTHER SPECIFIED MANIFESTATIONS TYPE I [JUVENILE TYPE] NOT STATED AS UNCONTROLLED
- 250.82 - DIABETES WITH OTHER SPECIFIED MANIFESTATIONS TYPE II OR UNSPECIFIED TYPE UNCONTROLLED
- 250.83 - DIABETES WITH OTHER SPECIFIED MANIFESTATIONS TYPE I [JUVENILE TYPE] UNCONTROLLED
- 250.9 - DIABETES WITH UNSPECIFIED COMPLICATION
- 250.90 - DIABETES WITH UNSPECIFIED COMPLICATION TYPE II OR UNSPECIFIED TYPE NOT STATED AS UNCONTROLLED
- 250.91 - DIABETES WITH UNSPECIFIED COMPLICATION TYPE I [JUVENILE TYPE] NOT STATED AS UNCONTROLLED
- 250.92 - DIABETES WITH UNSPECIFIED COMPLICATION TYPE II OR UNSPECIFIED TYPE UNCONTROLLED
- 250.93 - DIABETES WITH UNSPECIFIED COMPLICATION TYPE I [JUVENILE TYPE] UNCONTROLLED

### *Occurrence of heart failure*

This event measure was defined as occurring when any of the following criteria were met:

- The occurrence of **Inpatient Confinement** with the following attributes:

- **ICD-9 Diagnosis Code (any position)** is any of: { 402.01, 402.11, 402.91, 404.01, 404.03, 404.11, 404.13, 404.91, 404.93, 428.20, 428.21, 428.22, 428.23, 428.30, 428.31, 428.32, 428.33, 428.40, 428.41, 428.42, 428.43 }
- 402.01 - MALIGNANT HYPERTENSIVE HEART DISEASE WITH HEART FAILURE
- 402.11 - BENIGN HYPERTENSIVE HEART DISEASE WITH HEART FAILURE
- 402.91 - UNSPECIFIED HYPERTENSIVE HEART DISEASE WITH HEART FAILURE
- 404.01 - HYPERTENSIVE HEART AND CHRONIC KIDNEY DISEASE MALIGNANT WITH HEART FAILURE WITH CHRONIC KIDNEY DISEASE STAGE I THROUGH STAGE IV OR UNSPECIFIED
- 404.03 - HYPERTENSIVE HEART AND CHRONIC KIDNEY DISEASE MALIGNANT WITH HEART FAILURE WITH CHRONIC KIDNEY DISEASE STAGE V OR END STAGE RENAL DISEASE
- 404.11 - HYPERTENSIVE HEART AND CHRONIC KIDNEY DISEASE BENIGN WITH HEART FAILURE WITH CHRONIC KIDNEY DISEASE STAGE I THROUGH STAGE IV OR UNSPECIFIED
- 404.13 - HYPERTENSIVE HEART AND CHRONIC KIDNEY DISEASE BENIGN WITH HEART FAILURE WITH CHRONIC KIDNEY DISEASE STAGE V OR END STAGE RENAL DISEASE
- 404.91 - HYPERTENSIVE HEART AND CHRONIC KIDNEY DISEASE UNSPECIFIED WITH HEART FAILURE WITH CHRONIC KIDNEY DISEASE STAGE I THROUGH STAGE IV OR UNSPECIFIED
- 404.93 - HYPERTENSIVE HEART AND CHRONIC KIDNEY DISEASE UNSPECIFIED WITH HEART FAILURE WITH CHRONIC KIDNEY DISEASE STAGE V OR END STAGE RENAL DISEASE
- 428.20 - UNSPECIFIED SYSTOLIC HEART FAILURE
- 428.21 - ACUTE SYSTOLIC HEART FAILURE
- 428.22 - CHRONIC SYSTOLIC HEART FAILURE
- 428.23 - ACUTE ON CHRONIC SYSTOLIC HEART FAILURE
- 428.30 - UNSPECIFIED DIASTOLIC HEART FAILURE
- 428.31 - ACUTE DIASTOLIC HEART FAILURE
- 428.32 - CHRONIC DIASTOLIC HEART FAILURE
- 428.33 - ACUTE ON CHRONIC DIASTOLIC HEART FAILURE
- 428.40 - UNSPECIFIED COMBINED SYSTOLIC AND DIASTOLIC HEART FAILURE
- 428.41 - ACUTE COMBINED SYSTOLIC AND DIASTOLIC HEART FAILURE
- 428.42 - CHRONIC COMBINED SYSTOLIC AND DIASTOLIC HEART FAILURE
- 428.43 - ACUTE ON CHRONIC COMBINED SYSTOLIC AND DIASTOLIC HEART FAILURE
- The occurrence of **Medical Services** with the following attributes:
  - **ICD-9 Diagnosis Code (any position)** is any of: { 402.01, 402.11, 402.91, 404.01, 404.03, 404.11, 404.13, 404.91, 404.93, 428.20, 428.21, 428.22, 428.23, 428.30, 428.31, 428.32, 428.33, 428.40, 428.41, 428.42, 428.43 }

- 402.01 - MALIGNANT HYPERTENSIVE HEART DISEASE WITH HEART FAILURE
- 402.11 - BENIGN HYPERTENSIVE HEART DISEASE WITH HEART FAILURE
- 402.91 - UNSPECIFIED HYPERTENSIVE HEART DISEASE WITH HEART FAILURE
- 404.01 - HYPERTENSIVE HEART AND CHRONIC KIDNEY DISEASE MALIGNANT WITH HEART FAILURE WITH CHRONIC KIDNEY DISEASE STAGE I THROUGH STAGE IV OR UNSPECIFIED
- 404.03 - HYPERTENSIVE HEART AND CHRONIC KIDNEY DISEASE MALIGNANT WITH HEART FAILURE WITH CHRONIC KIDNEY DISEASE STAGE V OR END STAGE RENAL DISEASE
- 404.11 - HYPERTENSIVE HEART AND CHRONIC KIDNEY DISEASE BENIGN WITH HEART FAILURE WITH CHRONIC KIDNEY DISEASE STAGE I THROUGH STAGE IV OR UNSPECIFIED
- 404.13 - HYPERTENSIVE HEART AND CHRONIC KIDNEY DISEASE BENIGN WITH HEART FAILURE WITH CHRONIC KIDNEY DISEASE STAGE V OR END STAGE RENAL DISEASE
- 404.91 - HYPERTENSIVE HEART AND CHRONIC KIDNEY DISEASE UNSPECIFIED WITH HEART FAILURE WITH CHRONIC KIDNEY DISEASE STAGE I THROUGH STAGE IV OR UNSPECIFIED
- 404.93 - HYPERTENSIVE HEART AND CHRONIC KIDNEY DISEASE UNSPECIFIED WITH HEART FAILURE WITH CHRONIC KIDNEY DISEASE STAGE V OR END STAGE RENAL DISEASE
- 428.20 - UNSPECIFIED SYSTOLIC HEART FAILURE
- 428.21 - ACUTE SYSTOLIC HEART FAILURE
- 428.22 - CHRONIC SYSTOLIC HEART FAILURE
- 428.23 - ACUTE ON CHRONIC SYSTOLIC HEART FAILURE
- 428.30 - UNSPECIFIED DIASTOLIC HEART FAILURE
- 428.31 - ACUTE DIASTOLIC HEART FAILURE
- 428.32 - CHRONIC DIASTOLIC HEART FAILURE
- 428.33 - ACUTE ON CHRONIC DIASTOLIC HEART FAILURE
- 428.40 - UNSPECIFIED COMBINED SYSTOLIC AND DIASTOLIC HEART FAILURE
- 428.41 - ACUTE COMBINED SYSTOLIC AND DIASTOLIC HEART FAILURE
- 428.42 - CHRONIC COMBINED SYSTOLIC AND DIASTOLIC HEART FAILURE
- 428.43 - ACUTE ON CHRONIC COMBINED SYSTOLIC AND DIASTOLIC HEART FAILURE

### *Occurrence of ischemic heart disease*

This event measure was defined as occurring when any of the following criteria were met:

- The occurrence of **Inpatient Confinement** with the following attributes:
  - **ICD-9 Diagnosis Code (any position)** is any of: { 410, 411, 412, 413, 414, 410.0, 410.00, 410.01, 410.02, 410.1, 410.10, 410.11, 410.12, 410.2, 410.20, 410.21, 410.22, 410.3, 410.30, 410.31, 410.32, 410.4, 410.40, 410.41, 410.42, 410.5, 410.50, 410.51, 410.52, 410.6, 410.60, 410.61, 410.62, 410.7, 410.70, 410.71, 410.72, 410.8, 410.80, 410.81, 410.82, 410.9, 410.90, 410.91, 410.92, 411.0, 411.1, 411.8, 411.81, 411.89, 413.0, 413.1, 413.9, 414.0, 414.00, 414.01, 414.02, 414.03, 414.04, 414.05, 414.06, 414.07, 414.1, 414.10, 414.11, 414.12, 414.19, 414.2, 414.3, 414.4, 414.8, 414.9 }



- 410 - ACUTE MYOCARDIAL INFARCTION
- 411 - OTHER ACUTE AND SUBACUTE FORMS OF ISCHEMIC HEART DISEASE
- 412 - OLD MYOCARDIAL INFARCTION
- 413 - ANGINA PECTORIS
- 414 - OTHER FORMS OF CHRONIC ISCHEMIC HEART DISEASE
- 410.0 - ACUTE MYOCARDIAL INFARCTION OF ANTEROLATERAL WALL
- 410.00 - ACUTE MYOCARDIAL INFARCTION OF ANTEROLATERAL WALL EPISODE OF CARE UNSPECIFIED
- 410.01 - ACUTE MYOCARDIAL INFARCTION OF ANTEROLATERAL WALL INITIAL EPISODE OF CARE
- 410.02 - ACUTE MYOCARDIAL INFARCTION OF ANTEROLATERAL WALL SUBSEQUENT EPISODE OF CARE
- 410.1 - ACUTE MYOCARDIAL INFARCTION OF OTHER ANTERIOR WALL
- 410.10 - ACUTE MYOCARDIAL INFARCTION OF OTHER ANTERIOR WALL EPISODE OF CARE UNSPECIFIED
- 410.11 - ACUTE MYOCARDIAL INFARCTION OF OTHER ANTERIOR WALL INITIAL EPISODE OF CARE
- 410.12 - ACUTE MYOCARDIAL INFARCTION OF OTHER ANTERIOR WALL SUBSEQUENT EPISODE OF CARE
- 410.2 - ACUTE MYOCARDIAL INFARCTION OF INFEROLATERAL WALL
- 410.20 - ACUTE MYOCARDIAL INFARCTION OF INFEROLATERAL WALL EPISODE OF CARE UNSPECIFIED
- 410.21 - ACUTE MYOCARDIAL INFARCTION OF INFEROLATERAL WALL INITIAL EPISODE OF CARE
- 410.22 - ACUTE MYOCARDIAL INFARCTION OF INFEROLATERAL WALL SUBSEQUENT EPISODE OF CARE
- 410.3 - ACUTE MYOCARDIAL INFARCTION OF INFEROPOSTERIOR WALL
- 410.30 - ACUTE MYOCARDIAL INFARCTION OF INFEROPOSTERIOR WALL EPISODE OF CARE UNSPECIFIED
- 410.31 - ACUTE MYOCARDIAL INFARCTION OF INFEROPOSTERIOR WALL INITIAL EPISODE OF CARE
- 410.32 - ACUTE MYOCARDIAL INFARCTION OF INFEROPOSTERIOR WALL SUBSEQUENT EPISODE OF CARE
- 410.4 - ACUTE MYOCARDIAL INFARCTION OF OTHER INFERIOR WALL
- 410.40 - ACUTE MYOCARDIAL INFARCTION OF OTHER INFERIOR WALL EPISODE OF CARE UNSPECIFIED
- 410.41 - ACUTE MYOCARDIAL INFARCTION OF OTHER INFERIOR WALL INITIAL EPISODE OF CARE
- 410.42 - ACUTE MYOCARDIAL INFARCTION OF OTHER INFERIOR WALL SUBSEQUENT EPISODE OF CARE
- 410.5 - ACUTE MYOCARDIAL INFARCTION OF OTHER LATERAL WALL
- 410.50 - ACUTE MYOCARDIAL INFARCTION OF OTHER LATERAL WALL EPISODE OF CARE UNSPECIFIED
- 410.51 - ACUTE MYOCARDIAL INFARCTION OF OTHER LATERAL WALL INITIAL EPISODE OF CARE
- 410.52 - ACUTE MYOCARDIAL INFARCTION OF OTHER LATERAL WALL SUBSEQUENT EPISODE OF CARE
- 410.6 - TRUE POSTERIOR WALL INFARCTION

- 410.60 - TRUE POSTERIOR WALL INFARCTION EPISODE OF CARE UNSPECIFIED
- 410.61 - TRUE POSTERIOR WALL INFARCTION INITIAL EPISODE OF CARE
- 410.62 - TRUE POSTERIOR WALL INFARCTION SUBSEQUENT EPISODE OF CARE
- 410.7 - SUBENDOCARDIAL INFARCTION
- 410.70 - SUBENDOCARDIAL INFARCTION EPISODE OF CARE UNSPECIFIED
- 410.71 - SUBENDOCARDIAL INFARCTION INITIAL EPISODE OF CARE
- 410.72 - SUBENDOCARDIAL INFARCTION SUBSEQUENT EPISODE OF CARE
- 410.8 - ACUTE MYOCARDIAL INFARCTION OF OTHER SPECIFIED SITES
- 410.80 - ACUTE MYOCARDIAL INFARCTION OF OTHER SPECIFIED SITES EPISODE OF CARE UNSPECIFIED
- 410.81 - ACUTE MYOCARDIAL INFARCTION OF OTHER SPECIFIED SITES INITIAL EPISODE OF CARE
- 410.82 - ACUTE MYOCARDIAL INFARCTION OF OTHER SPECIFIED SITES SUBSEQUENT EPISODE OF CARE
- 410.9 - ACUTE MYOCARDIAL INFARCTION OF UNSPECIFIED SITE
- 410.90 - ACUTE MYOCARDIAL INFARCTION OF UNSPECIFIED SITE EPISODE OF CARE UNSPECIFIED
- 410.91 - ACUTE MYOCARDIAL INFARCTION OF UNSPECIFIED SITE INITIAL EPISODE OF CARE
- 410.92 - ACUTE MYOCARDIAL INFARCTION OF UNSPECIFIED SITE SUBSEQUENT EPISODE OF CARE
- 411.0 - POSTMYOCARDIAL INFARCTION SYNDROME
- 411.1 - INTERMEDIATE CORONARY SYNDROME
- 411.8 - OTHER ACUTE AND SUBACUTE FORMS OF ISCHEMIC HEART DISEASE
- 411.81 - ACUTE CORONARY OCCLUSION WITHOUT MYOCARDIAL INFARCTION
- 411.89 - OTHER ACUTE AND SUBACUTE FORMS OF ISCHEMIC HEART DISEASE OTHER
- 413.0 - ANGINA DECUBITUS
- 413.1 - PRINZMETAL ANGINA
- 413.9 - OTHER AND UNSPECIFIED ANGINA PECTORIS
- 414.0 - CORONARY ATHEROSCLEROSIS
- 414.00 - CORONARY ATHEROSCLEROSIS OF UNSPECIFIED TYPE OF VESSEL NATIVE OR GRAFT
- 414.01 - CORONARY ATHEROSCLEROSIS OF NATIVE CORONARY ARTERY
- 414.02 - CORONARY ATHEROSCLEROSIS OF AUTOLOGOUS VEIN BYPASS GRAFT
- 414.03 - CORONARY ATHEROSCLEROSIS OF NONAUTOLOGOUS BIOLOGICAL BYPASS GRAFT
- 414.04 - CORONARY ATHEROSCLEROSIS OF ARTERY BYPASS GRAFT
- 414.05 - CORONARY ATHEROSCLEROSIS OF UNSPECIFIED BYPASS GRAFT
- 414.06 - CORONARY ATHEROSCLEROSIS OF NATIVE CORONARY ARTERY OF TRANSPLANTED HEART
- 414.07 - CORONARY ATHEROSCLEROSIS OF BYPASS GRAFT (ARTERY) (VEIN) OF TRANSPLANTED HEART
- 414.1 - ANEURYSM AND DISSECTION OF HEART
- 414.10 - ANEURYSM OF HEART (WALL)
- 414.11 - ANEURYSM OF CORONARY VESSELS
- 414.12 - DISSECTION OF CORONARY ARTERY

- 414.19 - OTHER ANEURYSM OF HEART
  - 414.2 - CHRONIC TOTAL OCCLUSION OF CORONARY ARTERY
  - 414.3 - CORONARY ATHEROSCLEROSIS DUE TO LIPID RICH PLAQUE
  - 414.4 - CORONARY ATHEROSCLEROSIS DUE TO CALCIFIED CORONARY LESION
  - 414.8 - OTHER SPECIFIED FORMS OF CHRONIC ISCHEMIC HEART DISEASE
  - 414.9 - CHRONIC ISCHEMIC HEART DISEASE UNSPECIFIED
- The occurrence of **Medical Services** with the following attributes:
    - **ICD-9 Diagnosis Code (any position)** is any of: { 410, 411, 412, 413, 414, 410.0, 410.00, 410.01, 410.02, 410.1, 410.10, 410.11, 410.12, 410.2, 410.20, 410.21, 410.22, 410.3, 410.30, 410.31, 410.32, 410.4, 410.40, 410.41, 410.42, 410.5, 410.50, 410.51, 410.52, 410.6, 410.60, 410.61, 410.62, 410.7, 410.70, 410.71, 410.72, 410.8, 410.80, 410.81, 410.82, 410.9, 410.90, 410.91, 410.92, 411.0, 411.1, 411.8, 411.81, 411.89, 413.0, 413.1, 413.9, 414.0, 414.00, 414.01, 414.02, 414.03, 414.04, 414.05, 414.06, 414.07, 414.1, 414.10, 414.11, 414.12, 414.19, 414.2, 414.3, 414.4, 414.8, 414.9 }

- 410 - ACUTE MYOCARDIAL INFARCTION
- 411 - OTHER ACUTE AND SUBACUTE FORMS OF ISCHEMIC HEART DISEASE
- 412 - OLD MYOCARDIAL INFARCTION
- 413 - ANGINA PECTORIS
- 414 - OTHER FORMS OF CHRONIC ISCHEMIC HEART DISEASE
- 410.0 - ACUTE MYOCARDIAL INFARCTION OF ANTEROLATERAL WALL
- 410.00 - ACUTE MYOCARDIAL INFARCTION OF ANTEROLATERAL WALL EPISODE OF CARE UNSPECIFIED
- 410.01 - ACUTE MYOCARDIAL INFARCTION OF ANTEROLATERAL WALL INITIAL EPISODE OF CARE
- 410.02 - ACUTE MYOCARDIAL INFARCTION OF ANTEROLATERAL WALL SUBSEQUENT EPISODE OF CARE
- 410.1 - ACUTE MYOCARDIAL INFARCTION OF OTHER ANTERIOR WALL
- 410.10 - ACUTE MYOCARDIAL INFARCTION OF OTHER ANTERIOR WALL EPISODE OF CARE UNSPECIFIED
- 410.11 - ACUTE MYOCARDIAL INFARCTION OF OTHER ANTERIOR WALL INITIAL EPISODE OF CARE
- 410.12 - ACUTE MYOCARDIAL INFARCTION OF OTHER ANTERIOR WALL SUBSEQUENT EPISODE OF CARE
- 410.2 - ACUTE MYOCARDIAL INFARCTION OF INFEROLATERAL WALL
- 410.20 - ACUTE MYOCARDIAL INFARCTION OF INFEROLATERAL WALL EPISODE OF CARE UNSPECIFIED
- 410.21 - ACUTE MYOCARDIAL INFARCTION OF INFEROLATERAL WALL INITIAL EPISODE OF CARE
- 410.22 - ACUTE MYOCARDIAL INFARCTION OF INFEROLATERAL WALL SUBSEQUENT EPISODE OF CARE
- 410.3 - ACUTE MYOCARDIAL INFARCTION OF INFEROPOSTERIOR WALL
- 410.30 - ACUTE MYOCARDIAL INFARCTION OF INFEROPOSTERIOR WALL EPISODE OF CARE UNSPECIFIED
- 410.31 - ACUTE MYOCARDIAL INFARCTION OF INFEROPOSTERIOR WALL INITIAL EPISODE OF CARE
- 410.32 - ACUTE MYOCARDIAL INFARCTION OF INFEROPOSTERIOR WALL SUBSEQUENT EPISODE OF CARE
- 410.4 - ACUTE MYOCARDIAL INFARCTION OF OTHER INFERIOR WALL
- 410.40 - ACUTE MYOCARDIAL INFARCTION OF OTHER INFERIOR WALL EPISODE OF CARE UNSPECIFIED
- 410.41 - ACUTE MYOCARDIAL INFARCTION OF OTHER INFERIOR WALL INITIAL EPISODE OF CARE
- 410.42 - ACUTE MYOCARDIAL INFARCTION OF OTHER INFERIOR WALL SUBSEQUENT EPISODE OF CARE
- 410.5 - ACUTE MYOCARDIAL INFARCTION OF OTHER LATERAL WALL
- 410.50 - ACUTE MYOCARDIAL INFARCTION OF OTHER LATERAL WALL EPISODE OF CARE UNSPECIFIED
- 410.51 - ACUTE MYOCARDIAL INFARCTION OF OTHER LATERAL WALL INITIAL EPISODE OF CARE
- 410.52 - ACUTE MYOCARDIAL INFARCTION OF OTHER LATERAL WALL SUBSEQUENT EPISODE OF CARE
- 410.6 - TRUE POSTERIOR WALL INFARCTION

- 410.60 - TRUE POSTERIOR WALL INFARCTION EPISODE OF CARE UNSPECIFIED
- 410.61 - TRUE POSTERIOR WALL INFARCTION INITIAL EPISODE OF CARE
- 410.62 - TRUE POSTERIOR WALL INFARCTION SUBSEQUENT EPISODE OF CARE
- 410.7 - SUBENDOCARDIAL INFARCTION
- 410.70 - SUBENDOCARDIAL INFARCTION EPISODE OF CARE UNSPECIFIED
- 410.71 - SUBENDOCARDIAL INFARCTION INITIAL EPISODE OF CARE
- 410.72 - SUBENDOCARDIAL INFARCTION SUBSEQUENT EPISODE OF CARE
- 410.8 - ACUTE MYOCARDIAL INFARCTION OF OTHER SPECIFIED SITES
- 410.80 - ACUTE MYOCARDIAL INFARCTION OF OTHER SPECIFIED SITES EPISODE OF CARE UNSPECIFIED
- 410.81 - ACUTE MYOCARDIAL INFARCTION OF OTHER SPECIFIED SITES INITIAL EPISODE OF CARE
- 410.82 - ACUTE MYOCARDIAL INFARCTION OF OTHER SPECIFIED SITES SUBSEQUENT EPISODE OF CARE
- 410.9 - ACUTE MYOCARDIAL INFARCTION OF UNSPECIFIED SITE
- 410.90 - ACUTE MYOCARDIAL INFARCTION OF UNSPECIFIED SITE EPISODE OF CARE UNSPECIFIED
- 410.91 - ACUTE MYOCARDIAL INFARCTION OF UNSPECIFIED SITE INITIAL EPISODE OF CARE
- 410.92 - ACUTE MYOCARDIAL INFARCTION OF UNSPECIFIED SITE SUBSEQUENT EPISODE OF CARE
- 411.0 - POSTMYOCARDIAL INFARCTION SYNDROME
- 411.1 - INTERMEDIATE CORONARY SYNDROME
- 411.8 - OTHER ACUTE AND SUBACUTE FORMS OF ISCHEMIC HEART DISEASE
- 411.81 - ACUTE CORONARY OCCLUSION WITHOUT MYOCARDIAL INFARCTION
- 411.89 - OTHER ACUTE AND SUBACUTE FORMS OF ISCHEMIC HEART DISEASE OTHER
- 413.0 - ANGINA DECUBITUS
- 413.1 - PRINZMETAL ANGINA
- 413.9 - OTHER AND UNSPECIFIED ANGINA PECTORIS
- 414.0 - CORONARY ATHEROSCLEROSIS
- 414.00 - CORONARY ATHEROSCLEROSIS OF UNSPECIFIED TYPE OF VESSEL NATIVE OR GRAFT
- 414.01 - CORONARY ATHEROSCLEROSIS OF NATIVE CORONARY ARTERY
- 414.02 - CORONARY ATHEROSCLEROSIS OF AUTOLOGOUS VEIN BYPASS GRAFT
- 414.03 - CORONARY ATHEROSCLEROSIS OF NONAUTOLOGOUS BIOLOGICAL BYPASS GRAFT
- 414.04 - CORONARY ATHEROSCLEROSIS OF ARTERY BYPASS GRAFT
- 414.05 - CORONARY ATHEROSCLEROSIS OF UNSPECIFIED BYPASS GRAFT
- 414.06 - CORONARY ATHEROSCLEROSIS OF NATIVE CORONARY ARTERY OF TRANSPLANTED HEART
- 414.07 - CORONARY ATHEROSCLEROSIS OF BYPASS GRAFT (ARTERY) (VEIN) OF TRANSPLANTED HEART
- 414.1 - ANEURYSM AND DISSECTION OF HEART
- 414.10 - ANEURYSM OF HEART (WALL)
- 414.11 - ANEURYSM OF CORONARY VESSELS
- 414.12 - DISSECTION OF CORONARY ARTERY

- 414.19 - OTHER ANEURYSM OF HEART
- 414.2 - CHRONIC TOTAL OCCLUSION OF CORONARY ARTERY
- 414.3 - CORONARY ATHEROSCLEROSIS DUE TO LIPID RICH PLAQUE
- 414.4 - CORONARY ATHEROSCLEROSIS DUE TO CALCIFIED CORONARY LESION
- 414.8 - OTHER SPECIFIED FORMS OF CHRONIC ISCHEMIC HEART DISEASE
- 414.9 - CHRONIC ISCHEMIC HEART DISEASE UNSPECIFIED

### *Use of NSAID*

This event measure was defined as occurring when any of the following criteria were met:

- The occurrence of **Prescription Claims** with the following attributes:
  - **NDC Generic Name** is any of: { ASPIRIN, CELECOXIB, DICLOFENAC POTASSIUM, DICLOFENAC SODIUM, DIFLUNISAL, ETODOLAC, IBUPROFEN, INDOMETHACIN, KETOPROFEN, NABUMETONE, NAPROXEN, NAPROXEN SODIUM, OXAPROZIN, PIROXICAM, ROFECOXIB, SALSALATE, SULINDAC, TOLMETIN SODIUM, VALDECOXIB, DICLOFENAC EPOLAMINE, DICLOFENAC SUBMICRONIZED, INDOMETHACIN SODIUM, KETOPROFEN, MICRONIZED, NABUMETONE, MICRONIZED }

- ASPIRIN
- CELECOXIB
- DICLOFENAC POTASSIUM
- DICLOFENAC SODIUM
- DIFLUNISAL
- ETODOLAC
- IBUPROFEN
- INDOMETHACIN
- KETOPROFEN
- NABUMETONE
- NAPROXEN
- NAPROXEN SODIUM
- OXAPROZIN
- PIROXICAM
- ROFECOXIB
- SALSALATE
- SULINDAC
- TOLMETIN SODIUM
- VALDECOXIB
- DICLOFENAC EPOLAMINE
- DICLOFENAC SUBMICRONIZED
- INDOMETHACIN SODIUM
- KETOPROFEN, MICRONIZED
- NABUMETONE, MICRONIZED

### *Use of any drug*

This event measure was defined as occurring when any of the following criteria were met:

- The occurrence of [Prescription Claims](#)

### *Use of beta blocker*

This event measure was defined as occurring when any of the following criteria were met:

- The occurrence of [Prescription Claims](#) with the following attributes:
  - [NDC Drug Code](#) is any of: { 00003072975, 00003073175, 00003074575, 00005310923, 00005310931, 00005311023, 00005311031, 00005311123, 00005311131, 00025090131, 00025090152, 00025091131, 00025091152, 00025092131, 00025092152, 00046042160, 00046042161, 00046042162, 00046042180, 00046042181, 00046042191, 00046042195, 00046042199, 00046042260, 00046042261, 00046042262, 00046042280, 00046042281, 00046042291, 00046042295, 00046042299, 00046042460, 00046042461, 00046042462, 00046047081, 00046047091, 00046047099, 00046047181, 00046047191, 00046047199, 00046047381, 00046047391, 00046047399, 00046047981, 00046047991, 00046047999, 00046326510, 00047007024, 00047007032, 00047007124, 00047007132, 00047063024, 00047063124, 00054372763, 00054372844, 00054373063, 00054475825, 00054475831,

00054475833, 00054475925, 00054475931, 00054475933, 00054875825,  
00054875925, 00054876404, 00054876416, 00054876504, 00054876516,  
00071007024, 00071007124, 00078007305, 00078011105, 00093060001,  
00093060010, 00093062001, 00093062010, 00093069101, 00093069201,  
00093069301, 00093069401, 00102333502, 00102334002, 00143150210,  
00143150225, 00143150310, 00143150325, 00157052610, 00157052710,  
00172361460, 00172361480, 00172361560, 00172361580, 00172421760,  
00172421770, 00172421860, 00172421870, 00182175801, 00182175810,  
00182175901, 00182175910, 00182181200, 00182181201, 00182181210,  
00182181289, 00182181300, 00182181301, 00182181310, 00182181389,  
00182192601, 00182192701, 00182192801, 00182192901, 00182194601,  
00182194701, 00223255001, 00223255002, 00223255101, 00223255102,  
00228232710, 00228232750, 00228232796, 00228232910, 00228232950,  
00228232996, 00228253410, 00228253510, 00228277811, 00228277850,  
00228277911, 00228277950, 00228278011, 00228278050, 00228278111,  
00228278150, 00245008410, 00245008411, 00245008510, 00245008511,  
00245008610, 00245008611, 00245008710, 00245008711, 00247105004,  
00247105030, 00247105052, 00247105059, 00247105060, 00247127300,  
00247127379, 00258360901, 00258360905, 00258360910, 00258361001,  
00258361005, 00258361010, 00258361101, 00258361105, 00258361110,  
00258361201, 00258361205, 00258361210, 00302573210, 00302573310,  
00304153800, 00304153801, 00304153900, 00304153901, 00304205801,  
00304205901, 00304206001, 00304206101, 00339531512, 00339531712,  
00339575312, 00339575512, 00339575712, 00339575912, 00349845100,  
00349845101, 00349845110, 00349845190, 00349845198, 00349845200,  
00349845201, 00349845210, 00349845290, 00349869901, 00349870001,  
00349870101, 00349870701, 00349893610, 00349893710, 00364075601,  
00364075602, 00364075690, 00364075701, 00364075702, 00364075790,  
00364241301, 00364241401, 00364241501, 00364241601, 00364254701,  
00364254801, 00364421501, 00364421601, 00367232710, 00367232750,  
00367232796, 00367232910, 00367232950, 00367232996, 00378005201,  
00378012701, 00378018201, 00378018210, 00378018301, 00378018310,  
00378616001, 00378616005, 00378618001, 00378618005, 00378622001,  
00378622005, 00378626001, 00378626005, 00405480401, 00405480501,  
00405488401, 00405488403, 00405488501, 00405488503, 00405489001,  
00405489101, 00405489201, 00405489301, 00440823060, 00440823090,  
00440823091, 00440823092, 00440823094, 00440823099, 00440823160,  
00440823190, 00440823192, 00440823194, 00536424301, 00536424401,  
00536430901, 00536430905, 00536430910, 00536430911, 00536431301,  
00536431305, 00536431310, 00536431311, 00536491101, 00536491201,  
00536491202, 00536491301, 00536491401, 00555036502, 00555036505,  
00555036506, 00555036602, 00555036605, 00555036606, 00556040201,  
00556040210, 00556040310, 00580122210, 00580122310, 00591555401,  
00591555403, 00591555404, 00591555410, 00591555501, 00591555503,  
00591555504, 00591555510, 00603522021, 00603522121, 00603548221,  
00603548232, 00603548302, 00603548321, 00603548332, 00603548921,  
00603548932, 00603549021, 00603549032, 00603549721, 00603549821,  
00603549921, 00603550021, 00615133129, 00615133143, 00615133153,  
00615133163, 00615133165, 00615133229, 00615133243, 00615133253,  
00615133263, 00615133265, 00615256110, 00615256113, 00615256117,



00615256129, 00615256132, 00615256139, 00615256143, 00615256153,  
00615256163, 00615256165, 00615256180, 00615256210, 00615256213,  
00615256229, 00615256232, 00615256239, 00615256243, 00615256253,  
00615256263, 00615350613, 00615354713, 00677104101, 00677104110,  
00677104201, 00677104210, 00677136301, 00677136401, 00677136501,  
00677136601, 00677145701, 00677145801, 00719178510, 00719178610,  
00719178710, 00719178810, 00719179410, 00719179413, 00719179510,  
00719179513, 00719180210, 00719180213, 00719180310, 00719180313,  
00725012301, 00725012305, 00725012310, 00725012401, 00725012405,  
00725012410, 00781116801, 00781116901, 00781134401, 00781134410,  
00781134413, 00781135401, 00781135410, 00781135413, 00781206101,  
00781206201, 00781206301, 00781206401, 00814644614, 00814644630,  
00814644714, 00814644730, 00832865604, 00832865616, 00832865630,  
00832865704, 00832865716, 00832865730, 00839711406, 00839711416,  
00839711420, 00839711506, 00839711516, 00839711520, 00839757206,  
00839757306, 00839757406, 00839757506, 00839776106, 00839776112,  
00839776206, 00839776212, 00904041160, 00904041161, 00904041170,  
00904041180, 00904041260, 00904041261, 00904041270, 00904041280,  
00904042160, 00904042260, 00904042360, 00904042460, 00904594761,  
00904594861, 00904594961, 00904595061, 00904789360, 00904789460,  
10019014501, 10019014543, 11845025701, 11845025704, 11845025801,  
11845025804, 16590080845, 16590080860, 16590080890, 16714002104,  
16714002106, 16714002110, 16714002112, 16714002204, 16714002206,  
16714002210, 16714002212, 17236058001, 17236058010, 17236058101,  
17236058110, 17236088301, 17236088401, 17236088501, 17236088601,  
21695066830, 21695066860, 21695066878, 23155011001, 23155011010,  
23155011101, 23155011110, 24090047088, 24090047188, 24090047388,  
24090047988, 24208016401, 24208016410, 24208016411, 24208016416,  
24208016501, 24208016510, 24208016511, 24208016516, 33358019230,  
33358019330, 33358019430, 35470050801, 35470050809, 35470050901,  
35470050909, 38779039903, 38779039904, 38779039906, 38779039911,  
38779039915, 38779039925, 39769007551, 39769007571, 42254027930,  
43353050860, 43353070160, 43478090088, 43478090188, 43478090288,  
43478090388, 44514075688, 44514075788, 46703009401, 46703009410,  
46703009501, 46703009510, 47202255101, 47202255103, 47202255201,  
47202255203, 47202273801, 47202273803, 47202273901, 47202273903,  
47202275701, 47202275703, 47202275801, 47202275803, 47202287303,  
47202295003, 47202295103, 47679070201, 47679070204, 47679070235,  
47679070301, 47679070304, 47679070335, 49502040901, 49502041001,  
49648153800, 49648153900, 49727092405, 49727092505, 49884010605,  
49884010610, 49884010710, 49884028201, 49884028210, 49884032801,  
49884032810, 49884032901, 49884032910, 49884033001, 49884033010,  
49884044201, 49884044301, 49884044305, 49999055560, 49999055590,  
50111046701, 50111046703, 50111046707, 50111046801, 50111046803,  
50111046807, 51079027701, 51079027717, 51079027719, 51079027720,  
51079027801, 51079027819, 51079027820, 51138037310, 51138037330,  
51138037410, 51138037430, 51138037510, 51138037530, 51138037610,  
51138037630, 51138040910, 51138040930, 51138041010, 51138041030,  
51138041110, 51138041130, 51138041210, 51138041230, 51138041330,  
51138041430, 51138058130, 51138058230, 51138058330, 51138058430,

51285032102, 51285032105, 51285032109, 51285032202, 51285032205,  
51285032209, 51285090502, 51285090602, 51432007303, 51432007503,  
51432093703, 51432093803, 51432093903, 51432094103, 51432097106,  
51432097206, 51728083710, 51728083810, 51875034001, 51875034101,  
51991081701, 51991081801, 51991081901, 51991082001, 52189021424,  
52189021429, 52189021430, 52189021524, 52189021529, 52189021530,  
52446037821, 52446037921, 52446038121, 52446038221, 52446040121,  
52446040132, 52446040221, 52446040232, 52493063901, 52493063930,  
52493063960, 52493064001, 52493064030, 52493064060, 52544030501,  
52544030510, 52544030601, 52544030610, 52544030651, 52544071001,  
52544071005, 52544071101, 52555001001, 52555001010, 52555001050,  
52555002001, 52555002010, 52555002050, 52555034310, 52555034410,  
52555045401, 52555045410, 52555045501, 52555045510, 52555047101,  
52555047201, 52555054501, 52555054601, 52555066801, 52555066901,  
52584018410, 52584018510, 52728004309, 52728004409, 52959021201,  
52959021210, 52959021220, 52959021245, 52959021250, 52959021260,  
52959024730, 52959054330, 52959082730, 53002036000, 53002036060,  
53002045600, 53002200703, 53258015301, 53258015306, 53258015313,  
53258015390, 53258015401, 53258015406, 53258015413, 53258015490,  
53445175800, 53445175900, 53467311001, 53467311030, 53489043001,  
53489043101, 53489045101, 53489045201, 53506070860, 53506071160,  
53633032101, 53633032110, 53633032111, 53633032116, 53633032201,  
53633032210, 53633032211, 53633032216, 53746021701, 53746021705,  
53746021710, 53746021779, 53746021879, 53978501409, 54124011130,  
54124011160, 54124039030, 54124047130, 54124047330, 54124047360,  
54124047930, 54274018010, 54274018110, 54274018130, 54274018210,  
54274018310, 54274021350, 54274021450, 54274061050, 54274061110,  
54274061150, 54274063450, 54569055600, 54569055650, 54569055700,  
54569055701, 54569055702, 54569055703, 54569055750, 54569055800,  
54569055850, 54569055900, 54569055901, 54569055902, 54569055903,  
54569055904, 54569055906, 54569055950, 54569056300, 54569056301,  
54569056302, 54569056303, 54569056400, 54569056401, 54569058600,  
54569058601, 54569060800, 54569060801, 54569060900, 54569163400,  
54569226200, 54569226201, 54569309700, 54569710500, 54569859400,  
54738046701, 54738046703, 54738046801, 54738046803, 54807028001,  
54807028101, 54812016001, 54812016010, 54812016101, 54812016110,  
54868005200, 54868005201, 54868005202, 54868029300, 54868029301,  
54868029303, 54868029304, 54868029305, 54868029306, 54868068000,  
54868068001, 54868068002, 54868085400, 54868085401, 54868107801,  
54868107803, 54868107805, 54868144100, 54868144101, 54868144200,  
54868144201, 54868144202, 54868151700, 54868151701, 54868151702,  
54868151703, 54868151800, 54868151801, 54868151802, 54868151803,  
54868257200, 54868257201, 54868257202, 54868267700, 54868360200,  
54868575500, 54868575501, 55045123608, 55045185901, 55045207801,  
55081045000, 55081045001, 55081045002, 55081045100, 55081045101,  
55081045102, 55081086000, 55084063901, 55084064001, 55084064030,  
55084064060, 55084067601, 55153110701, 55175047000, 55175047003,  
55175047106, 55175160206, 55289023301, 55289023310, 55289023312,  
55289023360, 55289023390, 55806032503, 55806032603, 55829045110,  
55829045210, 55947041830, 55947041930, 55953008840, 55953008870,

55953009340, 55953009370, 56126032111, 56126032211, 57247102200,  
57247102203, 57247102300, 57247102303, 57362016708, 57362016711,  
57362016713, 57362016766, 57362016776, 57362016784, 57362017411,  
57362017413, 57362017476, 57362017484, 57362051476, 57362051576,  
57480035501, 57480035506, 57480035601, 57480035606, 57480081001,  
57480081006, 57480081101, 57480081106, 57866019102, 57866430901,  
57866431301, 57866431304, 57866491101, 57866491201, 57866491301,  
57866491401, 58016052800, 58016052830, 58016052860, 58016052900,  
58016052910, 58016052930, 58016052950, 58016060400, 58016085900,  
58016085930, 58016085960, 58016085990, 58634000201, 58634000202,  
58864036330, 58864064556, 59772880401, 59772880501, 59911547001,  
59911547002, 59911547101, 59911547102, 59911547301, 59911547302,  
59911547901, 60346057030, 60346057040, 60346057090, 60346057094,  
60346059830, 60346059890, 60429016418, 60429016460, 60429016490,  
60429022712, 60429022718, 60429022760, 60429022790, 60809014155,  
60809014172, 61392001830, 61392001831, 61392001832, 61392001839,  
61392001845, 61392001851, 61392001854, 61392001856, 61392001860,  
61392001890, 61392039530, 61392039531, 61392039532, 61392039539,  
61392039545, 61392039551, 61392039554, 61392039556, 61392039560,  
61392039590, 61392039591, 61392042030, 61392042031, 61392042032,  
61392042034, 61392042039, 61392042045, 61392042051, 61392042054,  
61392042056, 61392042060, 61392042090, 61392042091, 61392042130,  
61392042131, 61392042132, 61392042139, 61392042145, 61392042151,  
61392042154, 61392042160, 61392042190, 61392042191, 61392042230,  
61392042231, 61392042232, 61392042239, 61392042245, 61392042251,  
61392042254, 61392042260, 61392042290, 61392042330, 61392042331,  
61392042332, 61392042334, 61392042339, 61392042345, 61392042351,  
61392042354, 61392042356, 61392042360, 61392042390, 61392042391,  
62584084201, 62584084233, 62584084280, 62584084285, 62584084301,  
62584084333, 62584084385, 62939711201, 62939712201, 62939713201,  
62939714201, 63629142301, 63629142302, 63629184201, 63629257001,  
63629257002, 63629257003, 63629257004, 63739021601, 63739021602,  
63739021603, 63739021701, 63739021702, 63739021703, 63874036801,  
63874036815, 63874036820, 63874036828, 63874036830, 63874036860,  
63874045401, 63874045404, 63874045415, 63874045420, 63874045430,  
63874045460, 68084020901, 68084020911, 68084021001, 68084021011,  
68084021101, 68084021111, 68084021201, 68084021211, 68084050301,  
68084050311, 68084050401, 68084050411, 68115030760, 68115030860,  
68115030899, 00003075050, 00003076550, 00005310223, 00005310231,  
00005311223, 00005311231, 00006005968, 00006013628, 00006013668,  
00006043768, 00024128906, 00025093131, 00025093151, 00028007101,  
00028007110, 00028007161, 00028007165, 00028007173, 00028420112,  
00028420133, 00028420212, 00046042480, 00046042481, 00046042491,  
00046042495, 00046042499, 00046042681, 00046042691, 00046042699,  
00046042860, 00046042861, 00046042862, 00046042880, 00046042881,  
00046042891, 00046042895, 00046042899, 00046043981, 00046043991,  
00046043999, 00047007224, 00047007232, 00047007324, 00047007424,  
00047007430, 00047072424, 00047072824, 00047072924, 00047095524,  
00054476025, 00054476031, 00054476033, 00054476125, 00054476225,  
00054476231, 00054476325, 00054876025, 00054876125, 00054876225,

00054876325, 00071007224, 00071007324, 00071007424, 00074177835,  
00074228505, 00078040001, 00078045905, 00078045909, 00093064001,  
00093064010, 00093068001, 00093068005, 00093073401, 00093073410,  
00102334502, 00102335005, 00102367001, 00143150410, 00143150425,  
00143150510, 00143150525, 00143150605, 00143150625, 00143987201,  
00157052810, 00157052901, 00157052905, 00172361660, 00172361680,  
00172361760, 00172361770, 00172363860, 00172363870, 00173079001,  
00173079002, 00173079101, 00173079102, 00182176001, 00182176010,  
00182176101, 00182176201, 00182176205, 00182176210, 00182181400,  
00182181401, 00182181410, 00182181489, 00182181500, 00182181501,  
00182181505, 00182181589, 00182192301, 00182192401, 00182192501,  
00182196701, 00182196710, 00182198801, 00182198810, 00182310685,  
00223255201, 00223255202, 00223255301, 00223255302, 00223255401,  
00223255402, 00228232110, 00228232150, 00228232196, 00228233110,  
00228233150, 00228233196, 00228233310, 00228233350, 00228255510,  
00228255550, 00228255596, 00247105100, 00247105130, 00247112030,  
00247112060, 00247116201, 00302573410, 00302573505, 00302573601,  
00302697001, 00302697101, 00304154000, 00304154001, 00304154101,  
00304154105, 00304172201, 00304172205, 00304204501, 00304204601,  
00304204701, 00339531912, 00339532012, 00339532112, 00349845300,  
00349845301, 00349845310, 00349845390, 00349845401, 00349845405,  
00349868901, 00349869001, 00349869101, 00349873601, 00349873605,  
00349882801, 00349882805, 00349893810, 00349895205, 00364075801,  
00364075802, 00364075890, 00364075901, 00364075905, 00364076001,  
00364076005, 00364076090, 00364235701, 00364235801, 00364235901,  
00364256101, 00364256102, 00364303625, 00367232110, 00367232150,  
00367232196, 00367233110, 00367233150, 00367233196, 00367233310,  
00367233350, 00378004701, 00378004702, 00378004704, 00378004710,  
00378005501, 00378018401, 00378018410, 00378018501, 00378018505,  
00378018510, 00378018701, 00378022101, 00378071501, 00405467401,  
00405467403, 00405488601, 00405488603, 00405488801, 00405488802,  
00405502001, 00409177835, 00409228505, 00440778606, 00440778630,  
00440778660, 00440778692, 00440778694, 00440823230, 00440823290,  
00440823294, 00440823390, 00440823394, 00440823490, 00440823494,  
00469275000, 00536431401, 00536431405, 00536431410, 00536431411,  
00536431501, 00536431601, 00536431605, 00536431901, 00536469501,  
00536469601, 00536469701, 00536494301, 00536494401, 00536494501,  
00536560501, 00536560510, 00536563901, 00536563910, 00555036702,  
00555036705, 00555036706, 00555036802, 00555036805, 00555036902,  
00555036904, 00555036905, 00556040410, 00580122410, 00580125105,  
00580174701, 00580174801, 00580174901, 00591046301, 00591046310,  
00591555601, 00591555603, 00591555604, 00591555610, 00591555701,  
00591555703, 00591555704, 00591555705, 00591562301, 00591573601,  
00591573701, 00591573801, 00603462821, 00603462832, 00603548421,  
00603548432, 00603548521, 00603548621, 00603548628, 00603549132,  
00603549221, 00603549228, 00603549321, 00603549328, 00603549421,  
00603607121, 00603607221, 00603607321, 00615256310, 00615256313,  
00615256329, 00615256332, 00615256339, 00615256343, 00615256353,  
00615256363, 00615256605, 00615256613, 00615256639, 00615355313,  
00615355353, 00615355363, 00641403086, 00641403186, 00641403286,

00677104301, 00677104310, 00677104401, 00677104405, 00677104410,  
00677137301, 00677137401, 00677137501, 00677148301, 00677148310,  
00719179610, 00719179613, 00719179710, 00719179810, 00719179812,  
00719180410, 00719180413, 00719180510, 00719180512, 00719195310,  
00719195410, 00725012501, 00725012505, 00725012510, 00725012601,  
00725012605, 00725012610, 00725019501, 00725019601, 00725019701,  
00725206001, 00725206005, 00725206010, 00781112601, 00781112701,  
00781112801, 00781122801, 00781122810, 00781122813, 00781136401,  
00781136410, 00781136413, 00781137201, 00781137210, 00781137213,  
00781137401, 00781137410, 00781138401, 00781138405, 00781138413,  
00781307075, 00781307095, 00781377795, 00814644514, 00814644528,  
00814644814, 00814644830, 00832016700, 00832106600, 00832106700,  
00832106800, 00839711606, 00839711616, 00839711620, 00839711706,  
00839711712, 00839711806, 00839711812, 00839711816, 00839736006,  
00839758406, 00839758506, 00839758606, 00839781006, 00839781016,  
00839784206, 00839784216, 00839793606, 00839793706, 00904041460,  
00904041461, 00904041470, 00904041480, 00904041640, 00904041660,  
00904041840, 00904041860, 00904041861, 00904041940, 00904041960,  
00904340560, 00904340660, 00904340760, 00904340860, 00904340960,  
00904341060, 00904603460, 00904603461, 00904603480, 00904634260,  
00904634280, 00904777360, 00904777361, 00904777380, 00904782160,  
00904782180, 00904794760, 00904794780, 11845020801, 11845020901,  
11845021001, 11845025901, 11845025904, 11845026001, 11845026101,  
11845026103, 12280020000, 16590013230, 16590013260, 16590013330,  
16590013360, 16590042830, 16590042860, 16590042872, 16590042890,  
16714002304, 16714002306, 16714002310, 16714002312, 16714002404,  
16714002410, 16714002504, 16714002505, 16714002510, 16714002511,  
17236008201, 17236008210, 17236058201, 17236058210, 17236058301,  
17236058305, 17236058310, 17236087701, 17236087801, 17236087901,  
21695029900, 21695029930, 21695029960, 21695029978, 21695029990,  
21695066930, 21695066960, 23155011201, 23155011210, 23155011301,  
23155011401, 23155011405, 23490592000, 23490592001, 23490620303,  
23490620306, 23490620309, 24090045085, 24090045185, 24208016601,  
24208016610, 24208016611, 24208016801, 24208016811, 24208016901,  
24208016905, 24208016910, 24208016911, 33358024300, 33358024330,  
35356078230, 35356078260, 35356078290, 35470051001, 35470051009,  
35470051101, 35470051105, 35470051201, 38130005101, 38130005104,  
38779018303, 38779018304, 38779018305, 38779018308, 38779018310,  
38779018315, 38779018325, 38779018350, 38779036601, 38779036603,  
38779036605, 38779036606, 38779036611, 38779036615, 39769007501,  
39769007502, 42254000530, 43063000601, 43063000690, 43063000693,  
43353070660, 44514051518, 44514075888, 44514075988, 46703009601,  
46703009610, 46703009701, 46703009705, 47202255301, 47202255303,  
47202255401, 47202255402, 47202272801, 47202274003, 47202274101,  
47202274102, 47202274503, 47202275901, 47202275902, 47202276201,  
47202276203, 47202277901, 47202278001, 47202287301, 47202295203,  
47202295301, 47202295402, 47202295501, 47679070401, 47679070404,  
47679070435, 47679070501, 47679070535, 47679082401, 47679082435,  
47679082501, 47679082535, 49452608901, 49452608902, 49452608903,  
49452781304, 49648154000, 49648154105, 49727092605, 49727092704,

49884010810, 49884010905, 49884010910, 49884012701, 49884012705,  
49884012710, 49884023901, 49884023905, 49884023910, 49884041310,  
49999022600, 49999022630, 49999022660, 49999028660, 50111046901,  
50111046903, 50111046907, 50111047001, 50111047002, 50111047101,  
50111047102, 50111047201, 50111047202, 50111085601, 50111085603,  
50742010901, 50742010910, 50752030905, 51079027901, 51079027920,  
51079028001, 51079028020, 51079080201, 51079080217, 51079080219,  
51079080220, 51138010830, 51138010930, 51138011730, 51138012030,  
51138015930, 51138041530, 51138041620, 51138041630, 51138041730,  
51285031902, 51285031904, 51285032002, 51285032004, 51285032005,  
51285032302, 51285032305, 51285032309, 51285032402, 51285032404,  
51432052303, 51432056703, 51432056903, 51432057103, 51432097306,  
51432097403, 51432097405, 51432097505, 51552043301, 51552043309,  
51552091004, 51552091005, 51655034924, 51728083910, 51728084005,  
51927160600, 51927200300, 52189021624, 52189021629, 52189021630,  
52189021724, 52189021729, 52189021730, 52189021824, 52189021829,  
52189021830, 52189021924, 52189021929, 52189021930, 52273027301,  
52273027401, 52273027410, 52273027501, 52446040332, 52446040421,  
52446040428, 52446044921, 52446045021, 52446045121, 52446050421,  
52446050428, 52446050432, 52446050521, 52493064101, 52493064130,  
52493064160, 52493064201, 52493064260, 52544030701, 52544030710,  
52544030751, 52544030801, 52544030805, 52544035201, 52544035205,  
52544035301, 52544046301, 52544046310, 52555004001, 52555004010,  
52555004050, 52555006001, 52555006005, 52555008001, 52555008005,  
52555034510, 52555034601, 52555050001, 52555050010, 52584018610,  
52584018705, 52728004509, 52728016410, 53002049500, 53002049520,  
53002049600, 53002102600, 53002102603, 53002102630, 53258015501,  
53258015506, 53258015513, 53258015590, 53258015601, 53258015606,  
53258015613, 53258015690, 53445176000, 53445176205, 53467005130,  
53467007130, 53467042401, 53467042430, 53467322101, 53467322130,  
53467322160, 53489036701, 53489036710, 53489045301, 53489045401,  
53506070960, 53506076030, 53633032301, 53633032310, 53633032311,  
53633032316, 53633032401, 53633032410, 53633032411, 53746021979,  
53746022079, 53978501509, 54124007112, 54124007130, 54124007160,  
54124036830, 54124079030, 54274009510, 54274009610, 54274009630,  
54274009710, 54274021550, 54274021610, 54274021630, 54274039710,  
54274039810, 54274039910, 54274061250, 54274061310, 54274061410,  
54274061430, 54274061510, 54523096140, 54523097201, 54523097240,  
54523097270, 54523098440, 54569044200, 54569052000, 54569056000,  
54569056001, 54569056017, 54569056050, 54569056100, 54569056101,  
54569056102, 54569056103, 54569056104, 54569056106, 54569056110,  
54569056132, 54569056150, 54569056200, 54569056250, 54569057800,  
54569057801, 54569057802, 54569152100, 54569161901, 54569249900,  
54569249901, 54569378800, 54569378801, 54569378802, 54569378803,  
54569854500, 54569854501, 54738046901, 54738046903, 54738047001,  
54738047101, 54738047102, 54807028201, 54807028301, 54812016201,  
54812016210, 54868005300, 54868005302, 54868005303, 54868005305,  
54868005306, 54868005307, 54868069601, 54868069602, 54868106300,  
54868106301, 54868106302, 54868299000, 54868299002, 54868299003,  
54868299004, 54868299005, 54868387300, 54868539500, 54868556400,

54868556401, 55045193909, 55081032400, 55081032401, 55081045200,  
55081045201, 55081045202, 55081045300, 55081045301, 55084064101,  
55084064130, 55084064160, 55084064201, 55084064260, 55153110801,  
55175160000, 55175440903, 55175444706, 55175444801, 55175444803,  
55175444806, 55289009330, 55289009360, 55289009390, 55289009393,  
55289017130, 55289023401, 55289023430, 55289023460, 55289023490,  
55370082107, 55370082108, 55390000310, 55829045310, 55829045410,  
55829045510, 55887019130, 55887019160, 55887019190, 55887019260,  
55887027430, 55887027490, 55947042030, 55953073440, 55953073470,  
55953073480, 55953096140, 55953097201, 55953097240, 55953098440,  
56126032311, 56126032411, 56126039211, 57247102400, 57247102403,  
57247102500, 57247102502, 57362016111, 57362016113, 57362016176,  
57362016184, 57362023111, 57362023113, 57362023184, 57362041811,  
57362041813, 57362041884, 57362063311, 57362063319, 57362063384,  
57480035701, 57480035706, 57480080301, 57480080306, 57664016708,  
57664016718, 57664016752, 57664016758, 57866431401, 57866431501,  
57866431601, 57866657901, 57866657903, 58016000100, 58016000130,  
58016000160, 58016000190, 58016053100, 58016053130, 58016053200,  
58016053202, 58016053260, 58016054300, 58016054360, 58016499601,  
58634000501, 58634000502, 58864043160, 58864068030, 58864069530,  
59591019268, 59591019468, 59762130201, 59762130203, 59772369302,  
59772369305, 60346080630, 60346080660, 60346080690, 60429012730,  
60429012760, 60760025260, 60951078270, 60951078370, 61392028030,  
61392028031, 61392028032, 61392028039, 61392028045, 61392028051,  
61392028054, 61392028056, 61392028060, 61392028090, 61392028091,  
61392042730, 61392042731, 61392042732, 61392042739, 61392042745,  
61392042751, 61392042754, 61392042756, 61392042760, 61392042790,  
61392042791, 61392043030, 61392043031, 61392043032, 61392043039,  
61392043045, 61392043051, 61392043054, 61392043056, 61392043060,  
61392043090, 61392043091, 62584026701, 62584026711, 62584078901,  
62584084401, 62584084501, 62939222101, 62991173801, 62991173802,  
62991173803, 62991304101, 62991304102, 63304058101, 63304058110,  
63323060401, 63629146201, 63629146202, 63629146203, 63629358701,  
63629358702, 63739017401, 63739017403, 63874048601, 63874048615,  
63874048630, 63874048640, 63874048660, 64376050301, 64376050310,  
65243026503, 65726025010, 65726025025, 65726025110, 65726025125,  
66860009002, 68115030930, 68115030960, 68115030990, 68115031060,  
68115062900, 68115062930, 76299042085, 76299042088, 76299042285,  
76299042288, 00003504050, 00003504075, 00003524050, 00005321934,  
00005321943, 00005322034, 00005322043, 00024128907, 00028005101,  
00028005110, 00028005161, 00028005165, 00028005173, 00038010110,  
00038010139, 00038010510, 00038010528, 00038010539, 00047095424,  
00047095432, 00074177825, 00078045805, 00078045809, 00093073301,  
00093073310, 00093075201, 00093075210, 00093075301, 00093075305,  
00143966010, 00143987310, 00182100401, 00182100410, 00182100489,  
00182100501, 00182100589, 00182196601, 00182196610, 00182198701,  
00182198710, 00182823600, 00182823689, 00185028101, 00185028110,  
00185028201, 00185028210, 00185028301, 00185028310, 00185028401,  
00185028410, 00186108805, 00186108839, 00186109005, 00186109039,  
00186109050, 00186109205, 00186109239, 00186109405, 00186730005,

00186730105, 00186730205, 00186730305, 00228255410, 00228255450,  
00228255496, 00247101200, 00247106530, 00247107230, 00247107260,  
00247111914, 00247111930, 00247111952, 00247111960, 00247127400,  
00247127460, 00310010110, 00310010139, 00310010510, 00310010534,  
00310010539, 00339572512, 00339572712, 00364251301, 00364251302,  
00364251390, 00364251401, 00364251490, 00364256001, 00364256002,  
00378001801, 00378001802, 00378001805, 00378001807, 00378001891,  
00378003201, 00378003202, 00378003204, 00378003210, 00378023101,  
00378023110, 00378075701, 00378075710, 00378075793, 00378459510,  
00378459577, 00378459610, 00378459677, 00378459710, 00378459777,  
00378459805, 00378459877, 00405410701, 00405410703, 00405410801,  
00405567301, 00405567303, 00406202301, 00406202310, 00406202401,  
00406202410, 00409177805, 00440717230, 00440717290, 00440778445,  
00440778490, 00440778506, 00440778520, 00440778528, 00440778530,  
00440778545, 00440778560, 00440778590, 00440778592, 00440778594,  
00517135501, 00517135525, 00536333101, 00536560401, 00536560410,  
00536563801, 00536563810, 00591046201, 00591046210, 00591319578,  
00591577801, 00603237221, 00603462721, 00603462732, 00615353313,  
00615355213, 00615355229, 00615355243, 00615355253, 00615355263,  
00615355265, 00677147901, 00677147910, 00677148201, 00677148210,  
00781122301, 00781122310, 00781122313, 00781137101, 00781137110,  
00781137113, 00781150701, 00781150710, 00781150713, 00781307175,  
00781307195, 00781522901, 00781522910, 00839772406, 00839774206,  
00839780906, 00839780916, 00839784106, 00839784116, 00904589061,  
00904603360, 00904603361, 00904603380, 00904616261, 00904616961,  
00904617061, 00904617161, 00904632261, 00904632361, 00904632461,  
00904634060, 00904634080, 00904634160, 00904634180, 00904763560,  
00904763561, 00904777260, 00904777261, 00904777280, 00904782060,  
00904782080, 00904794660, 00904794680, 00905572131, 11845049001,  
12280004900, 12280005000, 12280005015, 12280005030, 12280017200,  
12280017230, 15330002901, 15330002910, 16571044111, 16590031730,  
16590031760, 16590031772, 16590031790, 16590085128, 16714003304,  
16714003306, 17236008101, 17236008110, 21695029130, 21695029830,  
21695029860, 21695029878, 21695029890, 21695032400, 21695032430,  
21695049430, 21695049460, 21695049478, 21695049490, 21695095030,  
21695095060, 21695095090, 21695097230, 23490509601, 23490509602,  
23490509603, 23490592101, 23490592102, 23629015510, 23629015610,  
23629018010, 23629018110, 25021030305, 33358003900, 33358003930,  
33358024200, 33358024201, 33358024230, 33358024260, 33358024290,  
35356041530, 35356088860, 35356088890, 35356088930, 35356088960,  
35356088990, 35356089830, 35356089860, 35356089890, 35356093430,  
35356093460, 35356093490, 36000003310, 38779057804, 38779057805,  
38779057808, 38779057810, 38779057825, 38779057850, 42254004630,  
42254004690, 42254027330, 42254027390, 42291014218, 42291014245,  
42291014250, 42291014290, 43063006406, 43063021030, 43063021090,  
43063021130, 43063021190, 43063031630, 43063031690, 43063039830,  
43063039890, 43063039893, 43063039894, 43063044090, 43353013445,  
43353013460, 43353017330, 43353017342, 43353017345, 43353017360,  
43353017380, 43353034830, 43353034845, 43353057645, 43353057653,  
43353057660, 43353057670, 43353057680, 43353057692, 43353058330,



43353058345, 43353058360, 43353079560, 44514051418, 44514088518,  
47463501430, 47463501460, 47463501530, 47463501730, 47463501930,  
47463502030, 49452471801, 49452471802, 49502040101, 49884040401,  
49884040410, 49884040501, 49884040510, 49884040601, 49884040610,  
49884040701, 49884040710, 49884041210, 49884045701, 49884045710,  
49999001000, 49999001030, 49999001040, 49999001060, 49999017800,  
49999017830, 49999017860, 49999017890, 49999048230, 49999048300,  
49999048330, 49999048400, 49999048430, 49999057510, 49999057520,  
49999057530, 49999057560, 49999057590, 49999099600, 50111085501,  
50111085503, 50111085506, 50742010301, 50742010310, 50742010701,  
50742010705, 50742010801, 50742010810, 50752030805, 50752030809,  
51079016901, 51079016920, 51079017001, 51079017020, 51079017101,  
51079017103, 51079025501, 51079025517, 51079025519, 51079025520,  
51079068501, 51079068520, 51079080101, 51079080117, 51079080119,  
51079080120, 51079080123, 51079080124, 51079080130, 51079080156,  
51079080157, 51138009830, 51138010530, 51138010630, 51138010730,  
51138011530, 51138011630, 51138011830, 51138011930, 51138013330,  
51138015730, 51138015830, 51138017230, 51138017330, 51138017430,  
51138017530, 51138020430, 51138020530, 51138020630, 51138020730,  
51138046210, 51138046215, 51138046230, 51138046310, 51138046330,  
51138046350, 51138046410, 51138046430, 51138046510, 51138046530,  
51138056510, 51138056515, 51138056530, 51138056610, 51138056630,  
51138056650, 51138056710, 51138056730, 51138056810, 51138056830,  
51285083802, 51285083804, 51285083805, 51552091502, 51552091504,  
51655053224, 51655092826, 51655092852, 51655092882, 51927269700,  
52189025724, 52189025729, 52189025730, 52544046201, 52544046210,  
52555000701, 52555049901, 52555049910, 52555053401, 52555067401,  
52959025860, 52959083930, 52959083960, 53002100500, 53002100503,  
53002100505, 53002100550, 53265041410, 53265041411, 53467005101,  
53489036601, 53489036610, 53489053001, 53489053010, 53506074130,  
54124005130, 54124005145, 54124005160, 54124078630, 54458030030,  
54458030031, 54458030130, 54458030131, 54458030230, 54458030231,  
54569057700, 54569057701, 54569057702, 54569057703, 54569060100,  
54569060101, 54569060102, 54569365400, 54569365401, 54569365402,  
54569365403, 54569365404, 54569378700, 54569378701, 54569378702,  
54569378704, 54569444100, 54569444200, 54569471800, 54569587000,  
54569587001, 54569587002, 54569595400, 54569595401, 54569596100,  
54569596101, 54569596102, 54569629800, 54569629801, 54569629802,  
54569629803, 54569708000, 54569854300, 54569857400, 54569857401,  
54569859000, 54738013501, 54738013503, 54868068501, 54868197100,  
54868197101, 54868197103, 54868197104, 54868298900, 54868298902,  
54868298903, 54868298904, 54868298905, 54868298906, 54868298907,  
54868358700, 54868358701, 54868358702, 54868358703, 54868358704,  
54868358705, 54868422300, 54868422301, 54868422302, 54868422303,  
54868422304, 54868466100, 54868466101, 54868466102, 54868466103,  
54868502100, 54868502101, 54868502102, 54868502103, 54868502104,  
54868506800, 54868506801, 54868506802, 54868506803, 54868572600,  
54868572900, 54868572901, 54868572902, 54868572903, 54868572904,  
54868572905, 54868572906, 54868573000, 54868573001, 54868573002,  
54868573003, 54868573004, 54868573005, 54868573100, 54868573101,

54868573102, 54868573103, 54868573104, 54868573200, 54921010110,  
54921010139, 55045226901, 55045226902, 55045226906, 55045226908,  
55045226909, 55045228200, 55045228206, 55045336101, 55045376208,  
55045379801, 55081032500, 55081032501, 55081032502, 55111046601,  
55111046605, 55111046701, 55111046705, 55111046801, 55111046805,  
55111046901, 55111046905, 55175116300, 55289038230, 55289038293,  
55289041301, 55289041328, 55289041330, 55289041360, 55289041390,  
55289041393, 55289041394, 55289058730, 55289062730, 55289065330,  
55289065390, 55289085530, 55289090230, 55370012407, 55370082007,  
55370082008, 55390007310, 55390034810, 55390037310, 55806031603,  
55806031605, 55887047430, 55887047460, 55887047490, 55887047492,  
55953040140, 55953072740, 55953072770, 55953072780, 57362021811,  
57362021813, 57362021884, 57480044701, 57480044706, 57480080201,  
57480080206, 57664016608, 57664016618, 57664016652, 57664016658,  
57664026618, 57664026688, 57664047708, 57664047718, 57664047752,  
57664047758, 57664050608, 57664050618, 57664050652, 57664050658,  
57866315501, 57866333101, 57866333102, 57866333103, 57866657801,  
57866657802, 57866657803, 57866657805, 58016004500, 58016004530,  
58016004560, 58016004590, 58016033200, 58016033230, 58016037300,  
58016037302, 58016037330, 58016037360, 58016037390, 58016044200,  
58016044202, 58016044230, 58016044260, 58016044290, 58016044299,  
58016054400, 58016056630, 58016056660, 58016064000, 58016064015,  
58016064020, 58016064030, 58016077100, 58016077112, 58016077115,  
58016077120, 58016077130, 58016077160, 58016097400, 58016097430,  
58016097460, 58016097490, 58177029304, 58177029309, 58177029311,  
58177035804, 58177035809, 58177036804, 58177036809, 58177036811,  
58177036904, 58177036909, 58177036911, 58517032030, 58729048701,  
58864001601, 58864001628, 58864001630, 58864001660, 58864071730,  
58864075930, 58864076530, 59591026568, 59762130001, 59762130003,  
59762130101, 59762130103, 59772369202, 59772369205, 60346091430,  
60346091460, 60346091490, 60346091494, 60429002630, 60429012630,  
60429012660, 60429013901, 60429013910, 60429014001, 60429014010,  
60429014101, 60429014110, 60429014145, 60429014201, 60429014205,  
60429014210, 60429014245, 60760025160, 60814071101, 60814071110,  
61392028630, 61392028631, 61392028632, 61392028639, 61392028645,  
61392028651, 61392028654, 61392028656, 61392028660, 61392028690,  
61392028691, 61392054630, 61392054631, 61392054632, 61392054639,  
61392054645, 61392054651, 61392054654, 61392054656, 61392054660,  
61392054690, 61392054691, 62037083001, 62037083010, 62037083101,  
62037083110, 62037083201, 62037083210, 62037083301, 62037083310,  
62269025724, 62584026501, 62584026511, 62584026601, 62584026611,  
62584062101, 62584071501, 62584071511, 62584078801, 62584078833,  
62939221101, 62991289701, 62991289702, 62991289703, 63304057901,  
63304057910, 63304058001, 63304058010, 63304062301, 63304062310,  
63323066005, 63629146301, 63629146302, 63629146303, 63629146304,  
63629146305, 63629262601, 63629262602, 63629262603, 63629262604,  
63629363601, 63629363602, 63629409601, 63739017301, 63739017302,  
63739017303, 63739017310, 63739017315, 63739040510, 63739042810,  
63739045410, 63874038801, 63874038807, 63874038810, 63874038812,  
63874038815, 63874038820, 63874038830, 64376050201, 64376050210,

64679073402, 64679073403, 64679073408, 64679073409, 64679073502,  
64679073503, 64679073508, 64679073509, 64679073602, 64679073603,  
64679073608, 64679073609, 64679073702, 64679073703, 64679073708,  
65243023203, 65243023206, 65243023209, 65243023212, 65243023218,  
65243023245, 65243026506, 65243026509, 65243026518, 65243026545,  
65243032903, 65243032909, 65243032918, 65243037909, 65243037918,  
65243038209, 65243038218, 65862006201, 65862006299, 65862006301,  
65862006399, 65862006401, 65862006499, 65862017001, 65862017099,  
66116042130, 66116045530, 66116045630, 66267002930, 66267002960,  
66267002990, 66267002991, 66267002992, 66267034630, 66267034660,  
66267034690, 66267034691, 66267034692, 66267034693, 66336051430,  
66336051460, 66336051490, 66336052330, 66336052360, 66336052390,  
66336091430, 66336091460, 66336091490, 67253042209, 67253042210,  
67253042211, 67544007630, 67544007645, 67544007653, 67544007660,  
67544007670, 67544007673, 67544007680, 67544007686, 67544007692,  
67544007694, 67544007753, 67544007760, 67544007770, 67544007780,  
67544012230, 67544012245, 67544012253, 67544012260, 67544012270,  
67544012273, 67544012280, 67544012286, 67544012292, 67544013030,  
67544013045, 67544013053, 67544013060, 67544013070, 67544013080,  
67544027230, 67544027245, 67544027253, 67544027260, 67544027270,  
67544027273, 67544027280, 67544027286, 67544027292, 67544027294,  
67544028230, 67544028245, 67544028282, 67544028299, 67544033260,  
67544038730, 67544038760, 67544038780, 67544049145, 67544049160,  
67544049180, 67544049182, 67544049199, 67544056730, 67544056753,  
67544056760, 67544056770, 67544056780, 67544056792, 67544056798,  
67544057382, 67544057399, 67544062753, 67544062760, 67544062780,  
67544091130, 67544091145, 67544091153, 67544091160, 67544091170,  
67544091173, 67544091180, 67544091192, 67544091194, 67544091198,  
67544116082, 67544119999, 67544120030, 67544120042, 67544120045,  
67801030430, 67801031530, 67801031603, 68001011900, 68001011903,  
68001012000, 68001012003, 68001012100, 68001012103, 68001012200,  
68001012203, 68084030101, 68084030111, 68084030211, 68084030221,  
68084030301, 68084030311, 68084030401, 68084030411, 68115003830,  
68115023800, 68115023830, 68115023860, 68115023890, 68115023930,  
68115023960, 68115023990, 68115023997, 68115041930, 68115071500,  
68115074100, 68258107501, 68258108201, 68258108301, 68258601809,  
68258601909, 68258603309, 68258915001, 68382002401, 68382002410,  
68387053930, 68645019059, 68645019159, 68645047754, 68645047854,  
68645047954, 00005321834, 00005321843, 00005381638, 00005381738,  
00007414120, 00007414155, 00007414220, 00007414255, 00008417701,  
00008417702, 00008417704, 00008417901, 00008417902, 00074226720,  
00074226754, 00074233905, 00074233911, 00074233934, 00082417701,  
00082417702, 00082417901, 00082417902, 00085024404, 00085024405,  
00085024407, 00085024408, 00085036205, 00085036206, 00085036207,  
00085036208, 00085036209, 00085043802, 00085043803, 00085043805,  
00085043806, 00085075203, 00085075204, 00085075205, 00085075207,  
00085075208, 00093010001, 00093010201, 00093010205, 00093010601,  
00093078701, 00093078710, 00093527056, 00093527156, 00093729501,  
00093729505, 00093729601, 00093729605, 00172436400, 00172436410,  
00172436460, 00172436470, 00172436500, 00172436510, 00172436560,

00172436570, 00172436660, 00173034643, 00173034644, 00173034647,  
00173034743, 00173034744, 00173034747, 00173034843, 00173034844,  
00173034847, 00173035000, 00173035001, 00173035057, 00173035058,  
00182100101, 00182100189, 00182262901, 00182263001, 00182820200,  
00182820289, 00182820300, 00182820389, 00182823500, 00182823589,  
00185001001, 00185001005, 00185011701, 00185011705, 00185011801,  
00185011805, 00185077101, 00185077130, 00185077401, 00185077430,  
00228217711, 00228217811, 00247114630, 00247114660, 00310010710,  
00310010810, 00339572412, 00378021801, 00378021810, 00378052301,  
00378052393, 00378052401, 00378052493, 00378120001, 00378140001,  
00378363301, 00378363302, 00378363305, 00378363307, 00378363401,  
00378363402, 00378363405, 00378363407, 00405410601, 00406202201,  
00406202210, 00409226720, 00409226754, 00409233934, 00440717030,  
00440717045, 00440717090, 00440717110, 00440717130, 00440717145,  
00440717160, 00440717190, 00440717192, 00440768060, 00440768160,  
00456140201, 00456140211, 00456140230, 00456140263, 00456140501,  
00456140511, 00456140530, 00456140563, 00456141001, 00456141011,  
00456141030, 00456141063, 00456142001, 00456142030, 00536332501,  
00536332505, 00536333001, 00536333010, 00536563601, 00536563701,  
00591043701, 00591043801, 00591060501, 00591060505, 00591060601,  
00591060605, 00591060701, 00591577701, 00591577704, 00591577710,  
00603204621, 00603204721, 00603237021, 00603237121, 00603237132,  
00615353213, 00615353229, 00615353243, 00615353253, 00615353263,  
00615353265, 00615353288, 00615354429, 00615354443, 00615354453,  
00615354463, 00615354465, 00615354488, 00677147801, 00677147810,  
00677163301, 00677163310, 00677170101, 00677170105, 00677170201,  
00677170205, 00677170301, 00677170305, 00781107801, 00781107810,  
00781150601, 00781150610, 00781150613, 00781522001, 00781522010,  
00781522301, 00781522401, 00781522501, 00781522510, 00839772306,  
00839772316, 00839774106, 00839774116, 00839795106, 00839808406,  
00904513860, 00904513960, 00904539260, 00904539261, 00904539280,  
00904587261, 00904587361, 00904592861, 00904592961, 00904593061,  
00904609661, 00904609761, 00904617360, 00904630361, 00904763460,  
00904763461, 00904763480, 00905571152, 10019021002, 10019021004,  
11845048901, 11845048904, 12280030315, 12280030330, 13107014501,  
13107014505, 15330002501, 15330002510, 15330002801, 15330002810,  
16571043011, 16571043111, 16590025630, 16590025660, 16590053330,  
16590053360, 16590053372, 16590053390, 16714003104, 16714003106,  
16714003204, 16714003206, 17236068630, 17478042020, 17478042040,  
21695032230, 21695032290, 21695032330, 21695032360, 21695032390,  
21695059200, 21695059230, 21695059260, 21695064830, 21695064860,  
21695064878, 21695066730, 21695066790, 21695067030, 21695067090,  
21695098830, 21695099400, 23490509701, 23490509702, 23490509703,  
23490509801, 23490509802, 23490937203, 23490937206, 23629000101,  
23629000110, 23629003801, 23629003810, 23629011210, 24200074048,  
24200074051, 25021030020, 25021030040, 29300012601, 29300012613,  
29300012701, 29300012713, 33358003700, 33358003730, 33358003760,  
33358003800, 33358003830, 33358003860, 35356036230, 35356036260,  
35356052600, 35356052630, 35356052660, 35356073730, 35356073800,  
35356093030, 35356093060, 35356093090, 38779026203, 38779026204,

38779026205, 38779026210, 38779026225, 38779048904, 38779048905,  
38779048908, 38779048910, 38779048925, 38779048950, 38779056010,  
38779056025, 38779056050, 42254010730, 42254010760, 42254010790,  
42291010190, 42291010290, 42291014010, 42291014018, 42291014045,  
42291014090, 42291014110, 42291014118, 42291014145, 42291014190,  
42291022418, 42291022430, 42291022450, 42291022460, 42291022490,  
43063006206, 43063006230, 43063006290, 43063012960, 43063012993,  
43063029730, 43063029790, 43353011130, 43353011153, 43353011160,  
43353011180, 43353013330, 43353013353, 43353013360, 43353013380,  
43353039960, 43353044030, 43353044053, 43353044060, 43353044080,  
43353083260, 43353083280, 43353083330, 43353083345, 43353083360,  
43353083380, 43353083430, 43353083445, 43353083460, 43353083480,  
43547025710, 43547025750, 44514087618, 47028005401, 49452002001,  
49452002002, 49452002003, 49452391102, 49502040001, 49884012201,  
49884012205, 49884012301, 49884012305, 49884012401, 49884012405,  
49884045601, 49884045610, 49884058701, 49884058801, 49884094401,  
49884094410, 49999010400, 49999010430, 49999010460, 49999010490,  
49999045400, 49999045410, 49999045430, 49999045460, 49999045490,  
49999086600, 49999087230, 50268005015, 50268005115, 50742010101,  
50742010110, 50742010201, 50742010210, 51079068401, 51079068417,  
51079068419, 51079068420, 51079068424, 51079068463, 51079075901,  
51079075917, 51079075919, 51079075920, 51079075963, 51079092801,  
51079092820, 51079092901, 51079092920, 51079093201, 51079093220,  
51138009630, 51138009730, 51138013130, 51138013230, 51138038630,  
51138045230, 51138045330, 51138045430, 51138045530, 51138045930,  
51138045960, 51138046030, 51138046060, 51138046130, 51138046160,  
51138046930, 51138052830, 51138052930, 51138053030, 51138054130,  
51138054230, 51138054330, 51285006001, 51285006101, 51285083602,  
51285083604, 51285083605, 51285083702, 51285083704, 51285083705,  
51432044903, 51552091404, 51552091405, 51655053024, 51655053053,  
51927246700, 51927290600, 51927463500, 52189025624, 52189025629,  
52189025630, 52189025924, 52189025929, 52189025930, 52343002901,  
52343002905, 52544043701, 52544043801, 52544060501, 52544060505,  
52544060601, 52544060605, 52544060701, 52555000601, 52555000610,  
52555053101, 52555053110, 52555067301, 52555067310, 52555068901,  
52959025300, 52959025320, 52959025330, 52959025340, 52959028030,  
52959046301, 52959046330, 52959046360, 53002100400, 53002100403,  
53002101000, 53002104603, 53002104606, 53002104630, 53002104660,  
53265041210, 53265041211, 53265041310, 53265041311, 53467010501,  
53467010530, 53467010560, 53489035401, 53489035405, 53489035501,  
53489035505, 53489035601, 53489035605, 53489052901, 53489052910,  
53489053601, 53489053610, 53489055501, 53489055507, 53489055601,  
53489055607, 53506005630, 53506070730, 53506074030, 53978119905,  
54124003815, 54124003830, 54124003860, 54124056960, 54124059330,  
54124060230, 54124075260, 54458093105, 54569059000, 54569059001,  
54569059002, 54569059100, 54569059101, 54569059102, 54569059400,  
54569059401, 54569059402, 54569059403, 54569060000, 54569060001,  
54569060002, 54569060003, 54569060500, 54569060501, 54569151600,  
54569343200, 54569343201, 54569343202, 54569343203, 54569343204,  
54569343205, 54569343207, 54569343208, 54569388500, 54569388502,

54569388504, 54569388505, 54569388506, 54569597700, 54569597702,  
54569597704, 54569611900, 54569616900, 54569631400, 54569631500,  
54569634200, 54569634201, 54569800800, 54569800801, 54569850700,  
54569850701, 54569861400, 54738013301, 54738013303, 54738013401,  
54738013403, 54868070100, 54868100401, 54868187100, 54868187101,  
54868187102, 54868187104, 54868234901, 54868234902, 54868234903,  
54868234904, 54868234905, 54868286400, 54868286401, 54868392000,  
54868439500, 54868439501, 54868439502, 54868439503, 54868448600,  
54868462100, 54868484400, 54868484401, 54868484402, 54868484403,  
54868490300, 54868490301, 54868490302, 54868492100, 54868492101,  
54868492102, 54868501300, 54868501301, 54868509500, 54868509501,  
54868509502, 54868509503, 54868552000, 54868581700, 54868581701,  
54868581702, 54868594400, 54868594401, 54868601800, 54868601801,  
54921010510, 54921010534, 54921010539, 54921010710, 55045186001,  
55045186002, 55045186009, 55045249808, 55081052700, 55081052701,  
55081052702, 55111025501, 55111025505, 55175144100, 55175396009,  
55175520001, 55289022701, 55289022730, 55289022790, 55289022801,  
55289022803, 55289022806, 55289022814, 55289022830, 55289022860,  
55289022890, 55289025430, 55370012207, 55370012209, 55390013020,  
55390013040, 55806031503, 55806031505, 55887018001, 55887025930,  
55887025960, 55887025982, 55887025990, 55887059930, 55887059990,  
55887083801, 55947044030, 55953003940, 55953003980, 57480044601,  
57480044606, 57664024713, 57664024718, 57664024788, 57664026418,  
57664026488, 57664026518, 57664026588, 57866021901, 57866333001,  
57866333003, 57866333005, 57866333201, 57866333203, 57866465501,  
57866465502, 57866662201, 57866662301, 57866706801, 57866706802,  
58016030000, 58016030030, 58016030060, 58016030090, 58016033300,  
58016033315, 58016033330, 58016033360, 58016056700, 58016056730,  
58016056750, 58016058200, 58016058215, 58016058220, 58016058230,  
58016058260, 58729048601, 58729048610, 58864006501, 58864006530,  
58864036701, 58864036801, 58864072730, 58864074930, 58864074990,  
59591000768, 59591026368, 59762125801, 59762125802, 59762126101,  
59762126102, 59772618002, 59772618102, 59772618202, 59772618301,  
59911584201, 59911584401, 59911706001, 59911706101, 59930160201,  
59930160202, 59930160203, 59930160204, 59930163601, 59930163602,  
59930163603, 59930163604, 59930165301, 59930165302, 59930165303,  
60346058760, 60346071930, 60346071960, 60346071962, 60346071990,  
60346071994, 60429002530, 60429002590, 60429021130, 60429021190,  
60429027701, 60429027705, 60429027801, 60429027805, 60429027901,  
60505071700, 60505071701, 60505071702, 60505071703, 60505260901,  
60505260908, 60760005930, 60760006030, 60760014560, 60809010255,  
60809010272, 60814071001, 60814071010, 60976034643, 60976034644,  
60976034647, 60976034743, 60976034744, 60976034747, 60976034843,  
60976034844, 60976034847, 60976035057, 60976035058, 61392054230,  
61392054231, 61392054232, 61392054239, 61392054245, 61392054251,  
61392054254, 61392054260, 61392054290, 61392054291, 61392054330,  
61392054331, 61392054332, 61392054339, 61392054345, 61392054351,  
61392054354, 61392054356, 61392054360, 61392054390, 61392054391,  
61553011781, 61553011791, 61553033633, 61553033670, 61553034172,  
61703023322, 61703023341, 61703023347, 61703023348, 62269025624,

62269025630, 62269025924, 62269025930, 62584046701, 62584046711,  
62584046780, 62584046785, 62584061901, 62584061933, 62584062001,  
62584062033, 62991100101, 62991100102, 62991100103, 62991282101,  
62991282102, 62991282103, 62991295701, 62991295702, 62991295703,  
63304062101, 63304062110, 63304062201, 63304062210, 63629174001,  
63629174002, 63629174003, 63629178501, 63629178502, 63629178503,  
63629407001, 63629407002, 63739002701, 63739002702, 63739002703,  
63739002710, 63739002715, 63739002801, 63739002802, 63739002803,  
63739002810, 63739002815, 63739036610, 63874033201, 63874033207,  
63874033210, 63874033214, 63874033215, 63874033220, 63874033230,  
63874033260, 63874033290, 63874046801, 63874046810, 63874046814,  
63874046815, 63874046820, 63874046830, 63874046860, 63874046890,  
65162066910, 65162067010, 65243001403, 65243001409, 65243001418,  
65243001445, 65243034709, 65483035502, 65483035504, 65483039110,  
65483039111, 65483039150, 65483039210, 65483039222, 65483039250,  
65483039310, 65483039333, 65483039350, 65862008601, 65862008630,  
65862008701, 65862008730, 65862014501, 65862014505, 65862016801,  
65862016899, 65862016901, 65862016999, 66116023930, 66267003130,  
66267003160, 66336058700, 66336058730, 66336058760, 66336058790,  
66336071930, 66336071960, 66336071990, 66336083730, 67253042009,  
67253042010, 67253042011, 67253042109, 67253042110, 67253042111,  
67263039901, 67286417701, 67286417901, 67544008730, 67544008745,  
67544008753, 67544008760, 67544008770, 67544008773, 67544008780,  
67544008792, 67544016130, 67544016145, 67544016160, 67544016180,  
67544016192, 67544020830, 67544020853, 67544020860, 67544020880,  
67544024030, 67544024045, 67544024060, 67544024080, 67544032615,  
67544032630, 67544032645, 67544032660, 67544032673, 67544032680,  
67544037530, 67544037545, 67544037560, 67544037565, 67544037580,  
67544037630, 67544037645, 67544037660, 67544037670, 67544037673,  
67544037680, 67544056560, 67544112353, 67544113530, 67544113553,  
67544113560, 67544115930, 67544115953, 67544115960, 67544115980,  
67857070001, 67857070101, 68001015200, 68001015203, 68084026401,  
68084026411, 68084045601, 68084045611, 68084045701, 68084045711,  
68084048711, 68084048721, 68115003930, 68115003960, 68115003990,  
68115004030, 68115004060, 68115004090, 68115072700, 68115072730,  
68258100501, 68258107801, 68258900501, 68382002201, 68382002210,  
68382002301, 68382002310, 68382009501, 68382009505, 68382009517,  
68387053830, 68462016501, 68462016505, 68645031054, 68645035259,  
68645046859, 00006336603, 00006336610, 00006336612, 00006336632,  
00006336703, 00006336710, 00006336712, 00006336732, 00006355703,  
00006355732, 00006355735, 00006355791, 00006355803, 00006355832,  
00006355835, 00006355891, 00006889535, 00006889536, 00006889635,  
00006889636, 00007337013, 00007337059, 00007337113, 00007337159,  
00007337213, 00007337259, 00007337313, 00007337359, 00007413920,  
00007413955, 00007414020, 00007414055, 00093005101, 00093005105,  
00093013501, 00093013505, 00168019903, 00168019910, 00168019915,  
00168019925, 00168020003, 00168020010, 00168020015, 00168020025,  
00228217511, 00228217611, 00364307753, 00364307754, 00364307772,  
00364307853, 00364307854, 00364307872, 00378363101, 00378363102,  
00378363105, 00378363107, 00378363201, 00378363202, 00378363205,

00378363207, 00536152572, 00536153070, 00536153072, 00603733837,  
00603733839, 00603733841, 00603733937, 00603733939, 00603733941,  
00677162721, 00677162730, 00781522101, 00781522201, 00904524805,  
00904524810, 00904524835, 00904587061, 00904587161, 00904609861,  
00904609961, 00904630061, 00904630161, 00904630261, 12280037600,  
12280037630, 12280037700, 12280037730, 12280040330, 12280040430,  
12280040530, 12280040630, 13107014201, 13107014205, 13107014301,  
13107014305, 13107014401, 13107014405, 16571014010, 16571014015,  
16571014050, 16571014110, 16571014115, 16571014150, 17478028810,  
17478028811, 17478028812, 17478028910, 17478028911, 17478028912,  
21695064500, 21695064560, 21695064578, 21695064630, 21695064660,  
21695064678, 21695064690, 21695064730, 21695064760, 21695064778,  
21695064790, 23490936903, 23490936906, 23490937003, 23490937006,  
23490937103, 23490937106, 23629011110, 23629011310, 23629011410,  
24208000401, 24208000403, 24208032405, 24208032410, 24208032415,  
24208033005, 24208033010, 24208033015, 25010081056, 25010081156,  
25010081256, 25010081316, 25010081356, 25010081656, 25010081756,  
35356049030, 35356051230, 35356051260, 35356051330, 35356051830,  
35356090830, 35356090860, 35356094630, 35356094660, 42254016200,  
42254032010, 42291020330, 42291020350, 42291020360, 42291020390,  
42291022150, 42291022160, 42291022190, 42291022218, 42291022250,  
42291022260, 42291022290, 42291022330, 42291022350, 42291022360,  
42291022390, 43063012593, 43063012693, 43063012793, 43353010430,  
43353010453, 43353010460, 43353011930, 43353011953, 43353011960,  
43353011980, 43353012230, 43353012253, 43353012260, 43353013253,  
43353015653, 43353015660, 43353015680, 43353016030, 43353016053,  
43353016060, 43353016070, 43353016080, 43353047830, 43353047853,  
43353047860, 43353048553, 43353048630, 43353048653, 43353048660,  
43353048680, 43353083830, 43353083853, 43353083860, 43353083880,  
43547025410, 43547025450, 43547025510, 43547025550, 43547025610,  
43547025650, 49999057720, 49999093830, 49999093930, 50111082120,  
50111082126, 50111082127, 50111082220, 50111082226, 50111082227,  
50383002105, 50383002110, 50383002115, 51079077101, 51079077117,  
51079077119, 51079077120, 51079093001, 51079093017, 51079093019,  
51079093020, 51079093101, 51079093117, 51079093119, 51079093120,  
51138038330, 51138038430, 51138038530, 51138046630, 51138046730,  
51138046830, 51138051130, 51138051230, 51138051330, 51138051430,  
52343002601, 52343002605, 52343002701, 52343002705, 52343002801,  
52343002805, 52959113703, 53002084271, 53002084272, 53002087072,  
54569088100, 54569088200, 54569120400, 54569120500, 54569120600,  
54569120700, 54569428800, 54569428900, 54569430200, 54569430300,  
54569430600, 54569437400, 54569437500, 54569439400, 54569537200,  
54569538400, 54569538500, 54569597400, 54569597402, 54569597500,  
54569597502, 54569597503, 54569597600, 54569597602, 54569597604,  
54868010601, 54868062100, 54868062101, 54868062102, 54868066401,  
54868066402, 54868066403, 54868198000, 54868198001, 54868306200,  
54868306201, 54868306202, 54868326300, 54868326400, 54868371300,  
54868371301, 54868371400, 54868371401, 54868371402, 54868439600,  
54868439601, 54868439602, 54868439603, 54868442100, 54868442101,  
54868442102, 54868442400, 54868442401, 54868442402, 54868442403,



54868469100, 54868577100, 54868577101, 54868577300, 54868577301,  
54868577302, 54868577303, 54868586900, 54868586901, 54868601900,  
54868601901, 55045136005, 55081054400, 55081054500, 55081111300,  
55081111400, 55111025201, 55111025205, 55111025301, 55111025305,  
55111025401, 55111025405, 55289098630, 55947072205, 55947072210,  
55947072305, 55947072310, 57664024213, 57664024218, 57664024288,  
57664024413, 57664024418, 57664024488, 57664024513, 57664024518,  
57664024588, 57866260702, 57866260802, 58016112601, 58016606901,  
58016621601, 58016633101, 58768089805, 58768089810, 58768089815,  
58768089905, 58768089910, 58768089915, 58864073730, 59591076703,  
59591076710, 59591076712, 59591076803, 59591076810, 59591076812,  
59591376703, 59591376801, 59591376802, 59591376803, 60505055102,  
60505055103, 60505055104, 60505055202, 60505055203, 60505055204,  
60505059701, 60505059702, 60505059703, 60505059801, 60505059802,  
60505059803, 60505260601, 60505260608, 60505260701, 60505260708,  
60505260801, 60505260808, 60758080105, 60758080110, 60758080115,  
60758080205, 60758080210, 60758080215, 60760014260, 60760014360,  
60760014460, 60814072005, 60814072010, 60814072015, 60814072105,  
60814072110, 60814072115, 61314022405, 61314022505, 61314022525,  
61314022605, 61314022610, 61314022615, 61314022705, 61314022710,  
61314022715, 63629366801, 63629366802, 63629366803, 63629366901,  
63629366902, 63629366903, 63629406001, 63629406002, 65086052205,  
65086052210, 65086052215, 65086052505, 65086052510, 65086052515,  
65862014201, 65862014205, 65862014301, 65862014305, 65862014401,  
65862014405, 66336012560, 66336012660, 66336077230, 66336080830,  
66336080860, 67425000312, 67425000350, 67544004330, 67544004353,  
67544004360, 67544004380, 67544014330, 67544014353, 67544014360,  
67544014370, 67544014380, 67544030530, 67544030553, 67544030560,  
67544114353, 67544114360, 67544114380, 67544114553, 67544114560,  
67544114630, 67544114660, 67544118253, 67544118280, 67544118730,  
67544118753, 67544118760, 68001015100, 68001015103, 68001015300,  
68001015303, 68001015400, 68001015403, 68084026101, 68084026111,  
68084026201, 68084026211, 68084026301, 68084026311, 68115055100,  
68258900401, 68258900601, 68258900701, 68382009201, 68382009205,  
68382009217, 68382009301, 68382009305, 68382009317, 68382009401,  
68382009405, 68382009417, 68462016201, 68462016205, 68462016301,  
68462016305, 68462016401, 68462016405, 68645035059, 68645035159,  
68669052205, 68669052210, 68669052215, 68669052505, 68669052510,  
68669052515, 76478000205, 76478000210, 76478000215 }

- 00003072975 - PROPRANOLOL HCL
- 00003073175 - PROPRANOLOL HCL
- 00003074575 - PROPRANOLOL HCL
- 00005310923 - PROPRANOLOL HCL
- 00005310931 - PROPRANOLOL HCL
- 00005311023 - PROPRANOLOL HCL
- 00005311031 - PROPRANOLOL HCL
- 00005311123 - PROPRANOLOL HCL
- 00005311131 - PROPRANOLOL HCL
- 00025090131 - PROPRANOLOL HCL
- 00025090152 - PROPRANOLOL HCL
- 00025091131 - PROPRANOLOL HCL
- 00025091152 - PROPRANOLOL HCL
- 00025092131 - PROPRANOLOL HCL
- 00025092152 - PROPRANOLOL HCL
- 00046042160 - PROPRANOLOL HCL
- 00046042161 - PROPRANOLOL HCL
- 00046042162 - PROPRANOLOL HCL
- 00046042180 - PROPRANOLOL HCL
- 00046042181 - PROPRANOLOL HCL
- 00046042191 - PROPRANOLOL HCL
- 00046042195 - PROPRANOLOL HCL
- 00046042199 - PROPRANOLOL HCL
- 00046042260 - PROPRANOLOL HCL
- 00046042261 - PROPRANOLOL HCL
- 00046042262 - PROPRANOLOL HCL
- 00046042280 - PROPRANOLOL HCL
- 00046042281 - PROPRANOLOL HCL
- 00046042291 - PROPRANOLOL HCL
- 00046042295 - PROPRANOLOL HCL
- 00046042299 - PROPRANOLOL HCL
- 00046042460 - PROPRANOLOL HCL
- 00046042461 - PROPRANOLOL HCL
- 00046042462 - PROPRANOLOL HCL
- 00046047081 - PROPRANOLOL HCL
- 00046047091 - PROPRANOLOL HCL
- 00046047099 - PROPRANOLOL HCL
- 00046047181 - PROPRANOLOL HCL
- 00046047191 - PROPRANOLOL HCL
- 00046047199 - PROPRANOLOL HCL
- 00046047381 - PROPRANOLOL HCL
- 00046047391 - PROPRANOLOL HCL
- 00046047399 - PROPRANOLOL HCL
- 00046047981 - PROPRANOLOL HCL
- 00046047991 - PROPRANOLOL HCL
- 00046047999 - PROPRANOLOL HCL

- 00046326510 - PROPRANOLOL HCL
- 00047007024 - PROPRANOLOL HCL
- 00047007032 - PROPRANOLOL HCL
- 00047007124 - PROPRANOLOL HCL
- 00047007132 - PROPRANOLOL HCL
- 00047063024 - PINDOLOL
- 00047063124 - PINDOLOL
- 00054372763 - PROPRANOLOL HCL
- 00054372844 - PROPRANOLOL HCL
- 00054373063 - PROPRANOLOL HCL
- 00054475825 - PROPRANOLOL HCL
- 00054475831 - PROPRANOLOL HCL
- 00054475833 - PROPRANOLOL HCL
- 00054475925 - PROPRANOLOL HCL
- 00054475931 - PROPRANOLOL HCL
- 00054475933 - PROPRANOLOL HCL
- 00054875825 - PROPRANOLOL HCL
- 00054875925 - PROPRANOLOL HCL
- 00054876404 - PROPRANOLOL HCL
- 00054876416 - PROPRANOLOL HCL
- 00054876504 - PROPRANOLOL HCL
- 00054876516 - PROPRANOLOL HCL
- 00071007024 - PROPRANOLOL HCL
- 00071007124 - PROPRANOLOL HCL
- 00078007305 - PINDOLOL
- 00078011105 - PINDOLOL
- 00093060001 - PROPRANOLOL HCL
- 00093060010 - PROPRANOLOL HCL
- 00093062001 - PROPRANOLOL HCL
- 00093062010 - PROPRANOLOL HCL
- 00093069101 - PROPRANOLOL HCL
- 00093069201 - PROPRANOLOL HCL
- 00093069301 - PROPRANOLOL HCL
- 00093069401 - PROPRANOLOL HCL
- 00102333502 - PROPRANOLOL HCL
- 00102334002 - PROPRANOLOL HCL
- 00143150210 - PROPRANOLOL HCL
- 00143150225 - PROPRANOLOL HCL
- 00143150310 - PROPRANOLOL HCL
- 00143150325 - PROPRANOLOL HCL
- 00157052610 - PROPRANOLOL HCL
- 00157052710 - PROPRANOLOL HCL
- 00172361460 - PROPRANOLOL HCL
- 00172361480 - PROPRANOLOL HCL
- 00172361560 - PROPRANOLOL HCL
- 00172361580 - PROPRANOLOL HCL

- 00172421760 - PINDOLOL
- 00172421770 - PINDOLOL
- 00172421860 - PINDOLOL
- 00172421870 - PINDOLOL
- 00182175801 - PROPRANOLOL HCL
- 00182175810 - PROPRANOLOL HCL
- 00182175901 - PROPRANOLOL HCL
- 00182175910 - PROPRANOLOL HCL
- 00182181200 - PROPRANOLOL HCL
- 00182181201 - PROPRANOLOL HCL
- 00182181210 - PROPRANOLOL HCL
- 00182181289 - PROPRANOLOL HCL
- 00182181300 - PROPRANOLOL HCL
- 00182181301 - PROPRANOLOL HCL
- 00182181310 - PROPRANOLOL HCL
- 00182181389 - PROPRANOLOL HCL
- 00182192601 - PROPRANOLOL HCL
- 00182192701 - PROPRANOLOL HCL
- 00182192801 - PROPRANOLOL HCL
- 00182192901 - PROPRANOLOL HCL
- 00182194601 - PINDOLOL
- 00182194701 - PINDOLOL
- 00223255001 - PROPRANOLOL HCL
- 00223255002 - PROPRANOLOL HCL
- 00223255101 - PROPRANOLOL HCL
- 00223255102 - PROPRANOLOL HCL
- 00228232710 - PROPRANOLOL HCL
- 00228232750 - PROPRANOLOL HCL
- 00228232796 - PROPRANOLOL HCL
- 00228232910 - PROPRANOLOL HCL
- 00228232950 - PROPRANOLOL HCL
- 00228232996 - PROPRANOLOL HCL
- 00228253410 - PINDOLOL
- 00228253510 - PINDOLOL
- 00228277811 - PROPRANOLOL HCL
- 00228277850 - PROPRANOLOL HCL
- 00228277911 - PROPRANOLOL HCL
- 00228277950 - PROPRANOLOL HCL
- 00228278011 - PROPRANOLOL HCL
- 00228278050 - PROPRANOLOL HCL
- 00228278111 - PROPRANOLOL HCL
- 00228278150 - PROPRANOLOL HCL
- 00245008410 - PROPRANOLOL HCL
- 00245008411 - PROPRANOLOL HCL
- 00245008510 - PROPRANOLOL HCL
- 00245008511 - PROPRANOLOL HCL

- 00245008610 - PROPRANOLOL HCL
- 00245008611 - PROPRANOLOL HCL
- 00245008710 - PROPRANOLOL HCL
- 00245008711 - PROPRANOLOL HCL
- 00247105004 - PROPRANOLOL HCL
- 00247105030 - PROPRANOLOL HCL
- 00247105052 - PROPRANOLOL HCL
- 00247105059 - PROPRANOLOL HCL
- 00247105060 - PROPRANOLOL HCL
- 00247127300 - PROPRANOLOL HCL
- 00247127379 - PROPRANOLOL HCL
- 00258360901 - PROPRANOLOL HCL
- 00258360905 - PROPRANOLOL HCL
- 00258360910 - PROPRANOLOL HCL
- 00258361001 - PROPRANOLOL HCL
- 00258361005 - PROPRANOLOL HCL
- 00258361010 - PROPRANOLOL HCL
- 00258361101 - PROPRANOLOL HCL
- 00258361105 - PROPRANOLOL HCL
- 00258361110 - PROPRANOLOL HCL
- 00258361201 - PROPRANOLOL HCL
- 00258361205 - PROPRANOLOL HCL
- 00258361210 - PROPRANOLOL HCL
- 00302573210 - PROPRANOLOL HCL
- 00302573310 - PROPRANOLOL HCL
- 00304153800 - PROPRANOLOL HCL
- 00304153801 - PROPRANOLOL HCL
- 00304153900 - PROPRANOLOL HCL
- 00304153901 - PROPRANOLOL HCL
- 00304205801 - PROPRANOLOL HCL
- 00304205901 - PROPRANOLOL HCL
- 00304206001 - PROPRANOLOL HCL
- 00304206101 - PROPRANOLOL HCL
- 00339531512 - PROPRANOLOL HCL
- 00339531712 - PROPRANOLOL HCL
- 00339575312 - PROPRANOLOL HCL
- 00339575512 - PROPRANOLOL HCL
- 00339575712 - PROPRANOLOL HCL
- 00339575912 - PROPRANOLOL HCL
- 00349845100 - PROPRANOLOL HCL
- 00349845101 - PROPRANOLOL HCL
- 00349845110 - PROPRANOLOL HCL
- 00349845190 - PROPRANOLOL HCL
- 00349845198 - PROPRANOLOL HCL
- 00349845200 - PROPRANOLOL HCL
- 00349845201 - PROPRANOLOL HCL

- 00349845210 - PROPRANOLOL HCL
- 00349845290 - PROPRANOLOL HCL
- 00349869901 - PROPRANOLOL HCL
- 00349870001 - PROPRANOLOL HCL
- 00349870101 - PROPRANOLOL HCL
- 00349870701 - PROPRANOLOL HCL
- 00349893610 - PROPRANOLOL HCL
- 00349893710 - PROPRANOLOL HCL
- 00364075601 - PROPRANOLOL HCL
- 00364075602 - PROPRANOLOL HCL
- 00364075690 - PROPRANOLOL HCL
- 00364075701 - PROPRANOLOL HCL
- 00364075702 - PROPRANOLOL HCL
- 00364075790 - PROPRANOLOL HCL
- 00364241301 - PROPRANOLOL HCL
- 00364241401 - PROPRANOLOL HCL
- 00364241501 - PROPRANOLOL HCL
- 00364241601 - PROPRANOLOL HCL
- 00364254701 - PINDOLOL
- 00364254801 - PINDOLOL
- 00364421501 - PROPRANOLOL HCL
- 00364421601 - PROPRANOLOL HCL
- 00367232710 - PROPRANOLOL HCL
- 00367232750 - PROPRANOLOL HCL
- 00367232796 - PROPRANOLOL HCL
- 00367232910 - PROPRANOLOL HCL
- 00367232950 - PROPRANOLOL HCL
- 00367232996 - PROPRANOLOL HCL
- 00378005201 - PINDOLOL
- 00378012701 - PINDOLOL
- 00378018201 - PROPRANOLOL HCL
- 00378018210 - PROPRANOLOL HCL
- 00378018301 - PROPRANOLOL HCL
- 00378018310 - PROPRANOLOL HCL
- 00378616001 - PROPRANOLOL HCL
- 00378616005 - PROPRANOLOL HCL
- 00378618001 - PROPRANOLOL HCL
- 00378618005 - PROPRANOLOL HCL
- 00378622001 - PROPRANOLOL HCL
- 00378622005 - PROPRANOLOL HCL
- 00378626001 - PROPRANOLOL HCL
- 00378626005 - PROPRANOLOL HCL
- 00405480401 - PINDOLOL
- 00405480501 - PINDOLOL
- 00405488401 - PROPRANOLOL HCL
- 00405488403 - PROPRANOLOL HCL

- 00405488501 - PROPRANOLOL HCL
- 00405488503 - PROPRANOLOL HCL
- 00405489001 - PROPRANOLOL HCL
- 00405489101 - PROPRANOLOL HCL
- 00405489201 - PROPRANOLOL HCL
- 00405489301 - PROPRANOLOL HCL
- 00440823060 - PROPRANOLOL HCL
- 00440823090 - PROPRANOLOL HCL
- 00440823091 - PROPRANOLOL HCL
- 00440823092 - PROPRANOLOL HCL
- 00440823094 - PROPRANOLOL HCL
- 00440823099 - PROPRANOLOL HCL
- 00440823160 - PROPRANOLOL HCL
- 00440823190 - PROPRANOLOL HCL
- 00440823192 - PROPRANOLOL HCL
- 00440823194 - PROPRANOLOL HCL
- 00536424301 - PINDOLOL
- 00536424401 - PINDOLOL
- 00536430901 - PROPRANOLOL HCL
- 00536430905 - PROPRANOLOL HCL
- 00536430910 - PROPRANOLOL HCL
- 00536430911 - PROPRANOLOL HCL
- 00536431301 - PROPRANOLOL HCL
- 00536431305 - PROPRANOLOL HCL
- 00536431310 - PROPRANOLOL HCL
- 00536431311 - PROPRANOLOL HCL
- 00536491101 - PROPRANOLOL HCL
- 00536491201 - PROPRANOLOL HCL
- 00536491202 - PROPRANOLOL HCL
- 00536491301 - PROPRANOLOL HCL
- 00536491401 - PROPRANOLOL HCL
- 00555036502 - PROPRANOLOL HCL
- 00555036505 - PROPRANOLOL HCL
- 00555036506 - PROPRANOLOL HCL
- 00555036602 - PROPRANOLOL HCL
- 00555036605 - PROPRANOLOL HCL
- 00555036606 - PROPRANOLOL HCL
- 00556040201 - PROPRANOLOL HCL
- 00556040210 - PROPRANOLOL HCL
- 00556040310 - PROPRANOLOL HCL
- 00580122210 - PROPRANOLOL HCL
- 00580122310 - PROPRANOLOL HCL
- 00591555401 - PROPRANOLOL HCL
- 00591555403 - PROPRANOLOL HCL
- 00591555404 - PROPRANOLOL HCL
- 00591555410 - PROPRANOLOL HCL

- 00591555501 - PROPRANOLOL HCL
- 00591555503 - PROPRANOLOL HCL
- 00591555504 - PROPRANOLOL HCL
- 00591555510 - PROPRANOLOL HCL
- 00603522021 - PINDOLOL
- 00603522121 - PINDOLOL
- 00603548221 - PROPRANOLOL HCL
- 00603548232 - PROPRANOLOL HCL
- 00603548302 - PROPRANOLOL HCL
- 00603548321 - PROPRANOLOL HCL
- 00603548332 - PROPRANOLOL HCL
- 00603548921 - PROPRANOLOL HCL
- 00603548932 - PROPRANOLOL HCL
- 00603549021 - PROPRANOLOL HCL
- 00603549032 - PROPRANOLOL HCL
- 00603549721 - PROPRANOLOL HCL
- 00603549821 - PROPRANOLOL HCL
- 00603549921 - PROPRANOLOL HCL
- 00603550021 - PROPRANOLOL HCL
- 00615133129 - PROPRANOLOL HCL
- 00615133143 - PROPRANOLOL HCL
- 00615133153 - PROPRANOLOL HCL
- 00615133163 - PROPRANOLOL HCL
- 00615133165 - PROPRANOLOL HCL
- 00615133229 - PROPRANOLOL HCL
- 00615133243 - PROPRANOLOL HCL
- 00615133253 - PROPRANOLOL HCL
- 00615133263 - PROPRANOLOL HCL
- 00615133265 - PROPRANOLOL HCL
- 00615256110 - PROPRANOLOL HCL
- 00615256113 - PROPRANOLOL HCL
- 00615256117 - PROPRANOLOL HCL
- 00615256129 - PROPRANOLOL HCL
- 00615256132 - PROPRANOLOL HCL
- 00615256139 - PROPRANOLOL HCL
- 00615256143 - PROPRANOLOL HCL
- 00615256153 - PROPRANOLOL HCL
- 00615256163 - PROPRANOLOL HCL
- 00615256165 - PROPRANOLOL HCL
- 00615256180 - PROPRANOLOL HCL
- 00615256210 - PROPRANOLOL HCL
- 00615256213 - PROPRANOLOL HCL
- 00615256229 - PROPRANOLOL HCL
- 00615256232 - PROPRANOLOL HCL
- 00615256239 - PROPRANOLOL HCL
- 00615256243 - PROPRANOLOL HCL



- 00615256253 - PROPRANOLOL HCL
- 00615256263 - PROPRANOLOL HCL
- 00615350613 - PINDOLOL
- 00615354713 - PINDOLOL
- 00677104101 - PROPRANOLOL HCL
- 00677104110 - PROPRANOLOL HCL
- 00677104201 - PROPRANOLOL HCL
- 00677104210 - PROPRANOLOL HCL
- 00677136301 - PROPRANOLOL HCL
- 00677136401 - PROPRANOLOL HCL
- 00677136501 - PROPRANOLOL HCL
- 00677136601 - PROPRANOLOL HCL
- 00677145701 - PINDOLOL
- 00677145801 - PINDOLOL
- 00719178510 - PROPRANOLOL HCL
- 00719178610 - PROPRANOLOL HCL
- 00719178710 - PROPRANOLOL HCL
- 00719178810 - PROPRANOLOL HCL
- 00719179410 - PROPRANOLOL HCL
- 00719179413 - PROPRANOLOL HCL
- 00719179510 - PROPRANOLOL HCL
- 00719179513 - PROPRANOLOL HCL
- 00719180210 - PROPRANOLOL HCL
- 00719180213 - PROPRANOLOL HCL
- 00719180310 - PROPRANOLOL HCL
- 00719180313 - PROPRANOLOL HCL
- 00725012301 - PROPRANOLOL HCL
- 00725012305 - PROPRANOLOL HCL
- 00725012310 - PROPRANOLOL HCL
- 00725012401 - PROPRANOLOL HCL
- 00725012405 - PROPRANOLOL HCL
- 00725012410 - PROPRANOLOL HCL
- 00781116801 - PINDOLOL
- 00781116901 - PINDOLOL
- 00781134401 - PROPRANOLOL HCL
- 00781134410 - PROPRANOLOL HCL
- 00781134413 - PROPRANOLOL HCL
- 00781135401 - PROPRANOLOL HCL
- 00781135410 - PROPRANOLOL HCL
- 00781135413 - PROPRANOLOL HCL
- 00781206101 - PROPRANOLOL HCL
- 00781206201 - PROPRANOLOL HCL
- 00781206301 - PROPRANOLOL HCL
- 00781206401 - PROPRANOLOL HCL
- 00814644614 - PROPRANOLOL HCL
- 00814644630 - PROPRANOLOL HCL

- 00814644714 - PROPRANOLOL HCL
- 00814644730 - PROPRANOLOL HCL
- 00832865604 - PROPRANOLOL HCL
- 00832865616 - PROPRANOLOL HCL
- 00832865630 - PROPRANOLOL HCL
- 00832865704 - PROPRANOLOL HCL
- 00832865716 - PROPRANOLOL HCL
- 00832865730 - PROPRANOLOL HCL
- 00839711406 - PROPRANOLOL HCL
- 00839711416 - PROPRANOLOL HCL
- 00839711420 - PROPRANOLOL HCL
- 00839711506 - PROPRANOLOL HCL
- 00839711516 - PROPRANOLOL HCL
- 00839711520 - PROPRANOLOL HCL
- 00839757206 - PROPRANOLOL HCL
- 00839757306 - PROPRANOLOL HCL
- 00839757406 - PROPRANOLOL HCL
- 00839757506 - PROPRANOLOL HCL
- 00839776106 - PINDOLOL
- 00839776112 - PINDOLOL
- 00839776206 - PINDOLOL
- 00839776212 - PINDOLOL
- 00904041160 - PROPRANOLOL HCL
- 00904041161 - PROPRANOLOL HCL
- 00904041170 - PROPRANOLOL HCL
- 00904041180 - PROPRANOLOL HCL
- 00904041260 - PROPRANOLOL HCL
- 00904041261 - PROPRANOLOL HCL
- 00904041270 - PROPRANOLOL HCL
- 00904041280 - PROPRANOLOL HCL
- 00904042160 - PROPRANOLOL HCL
- 00904042260 - PROPRANOLOL HCL
- 00904042360 - PROPRANOLOL HCL
- 00904042460 - PROPRANOLOL HCL
- 00904594761 - PROPRANOLOL HCL
- 00904594861 - PROPRANOLOL HCL
- 00904594961 - PROPRANOLOL HCL
- 00904595061 - PROPRANOLOL HCL
- 00904789360 - PINDOLOL
- 00904789460 - PINDOLOL
- 10019014501 - PROPRANOLOL HCL
- 10019014543 - PROPRANOLOL HCL
- 11845025701 - PROPRANOLOL HCL
- 11845025704 - PROPRANOLOL HCL
- 11845025801 - PROPRANOLOL HCL
- 11845025804 - PROPRANOLOL HCL

- 16590080845 - PROPRANOLOL HCL
- 16590080860 - PROPRANOLOL HCL
- 16590080890 - PROPRANOLOL HCL
- 16714002104 - PROPRANOLOL HCL
- 16714002106 - PROPRANOLOL HCL
- 16714002110 - PROPRANOLOL HCL
- 16714002112 - PROPRANOLOL HCL
- 16714002204 - PROPRANOLOL HCL
- 16714002206 - PROPRANOLOL HCL
- 16714002210 - PROPRANOLOL HCL
- 16714002212 - PROPRANOLOL HCL
- 17236058001 - PROPRANOLOL HCL
- 17236058010 - PROPRANOLOL HCL
- 17236058101 - PROPRANOLOL HCL
- 17236058110 - PROPRANOLOL HCL
- 17236088301 - PROPRANOLOL HCL
- 17236088401 - PROPRANOLOL HCL
- 17236088501 - PROPRANOLOL HCL
- 17236088601 - PROPRANOLOL HCL
- 21695066830 - PROPRANOLOL HCL
- 21695066860 - PROPRANOLOL HCL
- 21695066878 - PROPRANOLOL HCL
- 23155011001 - PROPRANOLOL HCL
- 23155011010 - PROPRANOLOL HCL
- 23155011101 - PROPRANOLOL HCL
- 23155011110 - PROPRANOLOL HCL
- 24090047088 - PROPRANOLOL HCL
- 24090047188 - PROPRANOLOL HCL
- 24090047388 - PROPRANOLOL HCL
- 24090047988 - PROPRANOLOL HCL
- 24208016401 - PROPRANOLOL HCL
- 24208016410 - PROPRANOLOL HCL
- 24208016411 - PROPRANOLOL HCL
- 24208016416 - PROPRANOLOL HCL
- 24208016501 - PROPRANOLOL HCL
- 24208016510 - PROPRANOLOL HCL
- 24208016511 - PROPRANOLOL HCL
- 24208016516 - PROPRANOLOL HCL
- 33358019230 - PROPRANOLOL HCL
- 33358019330 - PROPRANOLOL HCL
- 33358019430 - PROPRANOLOL HCL
- 35470050801 - PROPRANOLOL HCL
- 35470050809 - PROPRANOLOL HCL
- 35470050901 - PROPRANOLOL HCL
- 35470050909 - PROPRANOLOL HCL
- 38779039903 - PINDOLOL

- 38779039904 - PINDOLOL
- 38779039906 - PINDOLOL
- 38779039911 - PINDOLOL
- 38779039915 - PINDOLOL
- 38779039925 - PINDOLOL
- 39769007551 - PROPRANOLOL HCL
- 39769007571 - PROPRANOLOL HCL
- 42254027930 - PROPRANOLOL HCL
- 43353050860 - PROPRANOLOL HCL
- 43353070160 - PROPRANOLOL HCL
- 43478090088 - PROPRANOLOL HCL
- 43478090188 - PROPRANOLOL HCL
- 43478090288 - PROPRANOLOL HCL
- 43478090388 - PROPRANOLOL HCL
- 44514075688 - PROPRANOLOL HCL
- 44514075788 - PROPRANOLOL HCL
- 46703009401 - PROPRANOLOL HCL
- 46703009410 - PROPRANOLOL HCL
- 46703009501 - PROPRANOLOL HCL
- 46703009510 - PROPRANOLOL HCL
- 47202255101 - PROPRANOLOL HCL
- 47202255103 - PROPRANOLOL HCL
- 47202255201 - PROPRANOLOL HCL
- 47202255203 - PROPRANOLOL HCL
- 47202273801 - PROPRANOLOL HCL
- 47202273803 - PROPRANOLOL HCL
- 47202273901 - PROPRANOLOL HCL
- 47202273903 - PROPRANOLOL HCL
- 47202275701 - PROPRANOLOL HCL
- 47202275703 - PROPRANOLOL HCL
- 47202275801 - PROPRANOLOL HCL
- 47202275803 - PROPRANOLOL HCL
- 47202287303 - PROPRANOLOL HCL
- 47202295003 - PROPRANOLOL HCL
- 47202295103 - PROPRANOLOL HCL
- 47679070201 - PROPRANOLOL HCL
- 47679070204 - PROPRANOLOL HCL
- 47679070235 - PROPRANOLOL HCL
- 47679070301 - PROPRANOLOL HCL
- 47679070304 - PROPRANOLOL HCL
- 47679070335 - PROPRANOLOL HCL
- 49502040901 - PINDOLOL
- 49502041001 - PINDOLOL
- 49648153800 - PROPRANOLOL HCL
- 49648153900 - PROPRANOLOL HCL
- 49727092405 - PROPRANOLOL HCL

- 49727092505 - PROPRANOLOL HCL
- 49884010605 - PROPRANOLOL HCL
- 49884010610 - PROPRANOLOL HCL
- 49884010710 - PROPRANOLOL HCL
- 49884028201 - PROPRANOLOL HCL
- 49884028210 - PROPRANOLOL HCL
- 49884032801 - PROPRANOLOL HCL
- 49884032810 - PROPRANOLOL HCL
- 49884032901 - PROPRANOLOL HCL
- 49884032910 - PROPRANOLOL HCL
- 49884033001 - PROPRANOLOL HCL
- 49884033010 - PROPRANOLOL HCL
- 49884044201 - PINDOLOL
- 49884044301 - PINDOLOL
- 49884044305 - PINDOLOL
- 49999055560 - PROPRANOLOL HCL
- 49999055590 - PROPRANOLOL HCL
- 50111046701 - PROPRANOLOL HCL
- 50111046703 - PROPRANOLOL HCL
- 50111046707 - PROPRANOLOL HCL
- 50111046801 - PROPRANOLOL HCL
- 50111046803 - PROPRANOLOL HCL
- 50111046807 - PROPRANOLOL HCL
- 51079027701 - PROPRANOLOL HCL
- 51079027717 - PROPRANOLOL HCL
- 51079027719 - PROPRANOLOL HCL
- 51079027720 - PROPRANOLOL HCL
- 51079027801 - PROPRANOLOL HCL
- 51079027819 - PROPRANOLOL HCL
- 51079027820 - PROPRANOLOL HCL
- 51138037310 - PROPRANOLOL HCL
- 51138037330 - PROPRANOLOL HCL
- 51138037410 - PROPRANOLOL HCL
- 51138037430 - PROPRANOLOL HCL
- 51138037510 - PROPRANOLOL HCL
- 51138037530 - PROPRANOLOL HCL
- 51138037610 - PROPRANOLOL HCL
- 51138037630 - PROPRANOLOL HCL
- 51138040910 - PROPRANOLOL HCL
- 51138040930 - PROPRANOLOL HCL
- 51138041010 - PROPRANOLOL HCL
- 51138041030 - PROPRANOLOL HCL
- 51138041110 - PROPRANOLOL HCL
- 51138041130 - PROPRANOLOL HCL
- 51138041210 - PROPRANOLOL HCL
- 51138041230 - PROPRANOLOL HCL

- 51138041330 - PROPRANOLOL HCL
- 51138041430 - PROPRANOLOL HCL
- 51138058130 - PROPRANOLOL HCL
- 51138058230 - PROPRANOLOL HCL
- 51138058330 - PROPRANOLOL HCL
- 51138058430 - PROPRANOLOL HCL
- 51285032102 - PROPRANOLOL HCL
- 51285032105 - PROPRANOLOL HCL
- 51285032109 - PROPRANOLOL HCL
- 51285032202 - PROPRANOLOL HCL
- 51285032205 - PROPRANOLOL HCL
- 51285032209 - PROPRANOLOL HCL
- 51285090502 - PINDOLOL
- 51285090602 - PINDOLOL
- 51432007303 - PINDOLOL
- 51432007503 - PINDOLOL
- 51432093703 - PROPRANOLOL HCL
- 51432093803 - PROPRANOLOL HCL
- 51432093903 - PROPRANOLOL HCL
- 51432094103 - PROPRANOLOL HCL
- 51432097106 - PROPRANOLOL HCL
- 51432097206 - PROPRANOLOL HCL
- 51728083710 - PROPRANOLOL HCL
- 51728083810 - PROPRANOLOL HCL
- 51875034001 - PINDOLOL
- 51875034101 - PINDOLOL
- 51991081701 - PROPRANOLOL HCL
- 51991081801 - PROPRANOLOL HCL
- 51991081901 - PROPRANOLOL HCL
- 51991082001 - PROPRANOLOL HCL
- 52189021424 - PROPRANOLOL HCL
- 52189021429 - PROPRANOLOL HCL
- 52189021430 - PROPRANOLOL HCL
- 52189021524 - PROPRANOLOL HCL
- 52189021529 - PROPRANOLOL HCL
- 52189021530 - PROPRANOLOL HCL
- 52446037821 - PROPRANOLOL HCL
- 52446037921 - PROPRANOLOL HCL
- 52446038121 - PROPRANOLOL HCL
- 52446038221 - PROPRANOLOL HCL
- 52446040121 - PROPRANOLOL HCL
- 52446040132 - PROPRANOLOL HCL
- 52446040221 - PROPRANOLOL HCL
- 52446040232 - PROPRANOLOL HCL
- 52493063901 - PROPRANOLOL HCL
- 52493063930 - PROPRANOLOL HCL

- 52493063960 - PROPRANOLOL HCL
- 52493064001 - PROPRANOLOL HCL
- 52493064030 - PROPRANOLOL HCL
- 52493064060 - PROPRANOLOL HCL
- 52544030501 - PROPRANOLOL HCL
- 52544030510 - PROPRANOLOL HCL
- 52544030601 - PROPRANOLOL HCL
- 52544030610 - PROPRANOLOL HCL
- 52544030651 - PROPRANOLOL HCL
- 52544071001 - PINDOLOL
- 52544071005 - PINDOLOL
- 52544071101 - PINDOLOL
- 52555001001 - PROPRANOLOL HCL
- 52555001010 - PROPRANOLOL HCL
- 52555001050 - PROPRANOLOL HCL
- 52555002001 - PROPRANOLOL HCL
- 52555002010 - PROPRANOLOL HCL
- 52555002050 - PROPRANOLOL HCL
- 52555034310 - PROPRANOLOL HCL
- 52555034410 - PROPRANOLOL HCL
- 52555045401 - PINDOLOL
- 52555045410 - PINDOLOL
- 52555045501 - PINDOLOL
- 52555045510 - PINDOLOL
- 52555047101 - PINDOLOL
- 52555047201 - PINDOLOL
- 52555054501 - PINDOLOL
- 52555054601 - PINDOLOL
- 52555066801 - PINDOLOL
- 52555066901 - PINDOLOL
- 52584018410 - PROPRANOLOL HCL
- 52584018510 - PROPRANOLOL HCL
- 52728004309 - PROPRANOLOL HCL
- 52728004409 - PROPRANOLOL HCL
- 52959021201 - PROPRANOLOL HCL
- 52959021210 - PROPRANOLOL HCL
- 52959021220 - PROPRANOLOL HCL
- 52959021245 - PROPRANOLOL HCL
- 52959021250 - PROPRANOLOL HCL
- 52959021260 - PROPRANOLOL HCL
- 52959024730 - PROPRANOLOL HCL
- 52959054330 - PROPRANOLOL HCL
- 52959082730 - PROPRANOLOL HCL
- 53002036000 - PROPRANOLOL HCL
- 53002036060 - PROPRANOLOL HCL
- 53002045600 - PROPRANOLOL HCL

- 53002200703 - PROPRANOLOL HCL
- 53258015301 - PROPRANOLOL HCL
- 53258015306 - PROPRANOLOL HCL
- 53258015313 - PROPRANOLOL HCL
- 53258015390 - PROPRANOLOL HCL
- 53258015401 - PROPRANOLOL HCL
- 53258015406 - PROPRANOLOL HCL
- 53258015413 - PROPRANOLOL HCL
- 53258015490 - PROPRANOLOL HCL
- 53445175800 - PROPRANOLOL HCL
- 53445175900 - PROPRANOLOL HCL
- 53467311001 - PROPRANOLOL HCL
- 53467311030 - PROPRANOLOL HCL
- 53489043001 - PINDOLOL
- 53489043101 - PINDOLOL
- 53489045101 - PROPRANOLOL HCL
- 53489045201 - PROPRANOLOL HCL
- 53506070860 - PROPRANOLOL HCL
- 53506071160 - PROPRANOLOL HCL
- 53633032101 - PROPRANOLOL HCL
- 53633032110 - PROPRANOLOL HCL
- 53633032111 - PROPRANOLOL HCL
- 53633032116 - PROPRANOLOL HCL
- 53633032201 - PROPRANOLOL HCL
- 53633032210 - PROPRANOLOL HCL
- 53633032211 - PROPRANOLOL HCL
- 53633032216 - PROPRANOLOL HCL
- 53746021701 - PROPRANOLOL HCL
- 53746021705 - PROPRANOLOL HCL
- 53746021710 - PROPRANOLOL HCL
- 53746021779 - PROPRANOLOL HCL
- 53746021879 - PROPRANOLOL HCL
- 53978501409 - PROPRANOLOL HCL
- 54124011130 - PINDOLOL
- 54124011160 - PINDOLOL
- 54124039030 - PROPRANOLOL HCL
- 54124047130 - PROPRANOLOL HCL
- 54124047330 - PROPRANOLOL HCL
- 54124047360 - PROPRANOLOL HCL
- 54124047930 - PROPRANOLOL HCL
- 54274018010 - PROPRANOLOL HCL
- 54274018110 - PROPRANOLOL HCL
- 54274018130 - PROPRANOLOL HCL
- 54274018210 - PROPRANOLOL HCL
- 54274018310 - PROPRANOLOL HCL
- 54274021350 - PROPRANOLOL HCL



- 54274021450 - PROPRANOLOL HCL
- 54274061050 - PROPRANOLOL HCL
- 54274061110 - PROPRANOLOL HCL
- 54274061150 - PROPRANOLOL HCL
- 54274063450 - PROPRANOLOL HCL
- 54569055600 - PROPRANOLOL HCL
- 54569055650 - PROPRANOLOL HCL
- 54569055700 - PROPRANOLOL HCL
- 54569055701 - PROPRANOLOL HCL
- 54569055702 - PROPRANOLOL HCL
- 54569055703 - PROPRANOLOL HCL
- 54569055750 - PROPRANOLOL HCL
- 54569055800 - PROPRANOLOL HCL
- 54569055850 - PROPRANOLOL HCL
- 54569055900 - PROPRANOLOL HCL
- 54569055901 - PROPRANOLOL HCL
- 54569055902 - PROPRANOLOL HCL
- 54569055903 - PROPRANOLOL HCL
- 54569055904 - PROPRANOLOL HCL
- 54569055906 - PROPRANOLOL HCL
- 54569055950 - PROPRANOLOL HCL
- 54569056300 - PROPRANOLOL HCL
- 54569056301 - PROPRANOLOL HCL
- 54569056302 - PROPRANOLOL HCL
- 54569056303 - PROPRANOLOL HCL
- 54569056400 - PROPRANOLOL HCL
- 54569056401 - PROPRANOLOL HCL
- 54569058600 - PROPRANOLOL HCL
- 54569058601 - PROPRANOLOL HCL
- 54569060800 - PINDOLOL
- 54569060801 - PINDOLOL
- 54569060900 - PINDOLOL
- 54569163400 - PROPRANOLOL HCL
- 54569226200 - PROPRANOLOL HCL
- 54569226201 - PROPRANOLOL HCL
- 54569309700 - PROPRANOLOL HCL
- 54569710500 - PROPRANOLOL HCL
- 54569859400 - PROPRANOLOL HCL
- 54738046701 - PROPRANOLOL HCL
- 54738046703 - PROPRANOLOL HCL
- 54738046801 - PROPRANOLOL HCL
- 54738046803 - PROPRANOLOL HCL
- 54807028001 - PROPRANOLOL HCL
- 54807028101 - PROPRANOLOL HCL
- 54812016001 - PROPRANOLOL HCL
- 54812016010 - PROPRANOLOL HCL

- 54812016101 - PROPRANOLOL HCL
- 54812016110 - PROPRANOLOL HCL
- 54868005200 - PROPRANOLOL HCL
- 54868005201 - PROPRANOLOL HCL
- 54868005202 - PROPRANOLOL HCL
- 54868029300 - PROPRANOLOL HCL
- 54868029301 - PROPRANOLOL HCL
- 54868029303 - PROPRANOLOL HCL
- 54868029304 - PROPRANOLOL HCL
- 54868029305 - PROPRANOLOL HCL
- 54868029306 - PROPRANOLOL HCL
- 54868068000 - PROPRANOLOL HCL
- 54868068001 - PROPRANOLOL HCL
- 54868068002 - PROPRANOLOL HCL
- 54868085400 - PROPRANOLOL HCL
- 54868085401 - PROPRANOLOL HCL
- 54868107801 - PROPRANOLOL HCL
- 54868107803 - PROPRANOLOL HCL
- 54868107805 - PROPRANOLOL HCL
- 54868144100 - PROPRANOLOL HCL
- 54868144101 - PROPRANOLOL HCL
- 54868144200 - PROPRANOLOL HCL
- 54868144201 - PROPRANOLOL HCL
- 54868144202 - PROPRANOLOL HCL
- 54868151700 - PROPRANOLOL HCL
- 54868151701 - PROPRANOLOL HCL
- 54868151702 - PROPRANOLOL HCL
- 54868151703 - PROPRANOLOL HCL
- 54868151800 - PROPRANOLOL HCL
- 54868151801 - PROPRANOLOL HCL
- 54868151802 - PROPRANOLOL HCL
- 54868151803 - PROPRANOLOL HCL
- 54868257200 - PROPRANOLOL HCL
- 54868257201 - PROPRANOLOL HCL
- 54868257202 - PROPRANOLOL HCL
- 54868267700 - PROPRANOLOL HCL
- 54868360200 - PINDOLOL
- 54868575500 - PROPRANOLOL HCL
- 54868575501 - PROPRANOLOL HCL
- 55045123608 - PROPRANOLOL HCL
- 55045185901 - PINDOLOL
- 55045207801 - PROPRANOLOL HCL
- 55081045000 - PROPRANOLOL HCL
- 55081045001 - PROPRANOLOL HCL
- 55081045002 - PROPRANOLOL HCL
- 55081045100 - PROPRANOLOL HCL

- 55081045101 - PROPRANOLOL HCL
- 55081045102 - PROPRANOLOL HCL
- 55081086000 - PROPRANOLOL HCL
- 55084063901 - PROPRANOLOL HCL
- 55084064001 - PROPRANOLOL HCL
- 55084064030 - PROPRANOLOL HCL
- 55084064060 - PROPRANOLOL HCL
- 55084067601 - PROPRANOLOL HCL
- 55153110701 - PROPRANOLOL HCL
- 55175047000 - PROPRANOLOL HCL
- 55175047003 - PROPRANOLOL HCL
- 55175047106 - PROPRANOLOL HCL
- 55175160206 - PROPRANOLOL HCL
- 55289023301 - PROPRANOLOL HCL
- 55289023310 - PROPRANOLOL HCL
- 55289023312 - PROPRANOLOL HCL
- 55289023360 - PROPRANOLOL HCL
- 55289023390 - PROPRANOLOL HCL
- 55806032503 - PINDOLOL
- 55806032603 - PINDOLOL
- 55829045110 - PROPRANOLOL HCL
- 55829045210 - PROPRANOLOL HCL
- 55947041830 - PROPRANOLOL HCL
- 55947041930 - PROPRANOLOL HCL
- 55953008840 - PINDOLOL
- 55953008870 - PINDOLOL
- 55953009340 - PINDOLOL
- 55953009370 - PINDOLOL
- 56126032111 - PROPRANOLOL HCL
- 56126032211 - PROPRANOLOL HCL
- 57247102200 - PROPRANOLOL HCL
- 57247102203 - PROPRANOLOL HCL
- 57247102300 - PROPRANOLOL HCL
- 57247102303 - PROPRANOLOL HCL
- 57362016708 - PROPRANOLOL HCL
- 57362016711 - PROPRANOLOL HCL
- 57362016713 - PROPRANOLOL HCL
- 57362016766 - PROPRANOLOL HCL
- 57362016776 - PROPRANOLOL HCL
- 57362016784 - PROPRANOLOL HCL
- 57362017411 - PROPRANOLOL HCL
- 57362017413 - PROPRANOLOL HCL
- 57362017476 - PROPRANOLOL HCL
- 57362017484 - PROPRANOLOL HCL
- 57362051476 - PROPRANOLOL HCL
- 57362051576 - PROPRANOLOL HCL

- 57480035501 - PROPRANOLOL HCL
- 57480035506 - PROPRANOLOL HCL
- 57480035601 - PROPRANOLOL HCL
- 57480035606 - PROPRANOLOL HCL
- 57480081001 - PINDOLOL
- 57480081006 - PINDOLOL
- 57480081101 - PINDOLOL
- 57480081106 - PINDOLOL
- 57866019102 - PROPRANOLOL HCL
- 57866430901 - PROPRANOLOL HCL
- 57866431301 - PROPRANOLOL HCL
- 57866431304 - PROPRANOLOL HCL
- 57866491101 - PROPRANOLOL HCL
- 57866491201 - PROPRANOLOL HCL
- 57866491301 - PROPRANOLOL HCL
- 57866491401 - PROPRANOLOL HCL
- 58016052800 - PROPRANOLOL HCL
- 58016052830 - PROPRANOLOL HCL
- 58016052860 - PROPRANOLOL HCL
- 58016052900 - PROPRANOLOL HCL
- 58016052910 - PROPRANOLOL HCL
- 58016052930 - PROPRANOLOL HCL
- 58016052950 - PROPRANOLOL HCL
- 58016060400 - PROPRANOLOL HCL
- 58016085900 - PROPRANOLOL HCL
- 58016085930 - PROPRANOLOL HCL
- 58016085960 - PROPRANOLOL HCL
- 58016085990 - PROPRANOLOL HCL
- 58634000201 - PROPRANOLOL HCL
- 58634000202 - PROPRANOLOL HCL
- 58864036330 - PROPRANOLOL HCL
- 58864064556 - PROPRANOLOL HCL
- 59772880401 - PINDOLOL
- 59772880501 - PINDOLOL
- 59911547001 - PROPRANOLOL HCL
- 59911547002 - PROPRANOLOL HCL
- 59911547101 - PROPRANOLOL HCL
- 59911547102 - PROPRANOLOL HCL
- 59911547301 - PROPRANOLOL HCL
- 59911547302 - PROPRANOLOL HCL
- 59911547901 - PROPRANOLOL HCL
- 60346057030 - PROPRANOLOL HCL
- 60346057040 - PROPRANOLOL HCL
- 60346057090 - PROPRANOLOL HCL
- 60346057094 - PROPRANOLOL HCL
- 60346059830 - PROPRANOLOL HCL

- 60346059890 - PROPRANOLOL HCL
- 60429016418 - PROPRANOLOL HCL
- 60429016460 - PROPRANOLOL HCL
- 60429016490 - PROPRANOLOL HCL
- 60429022712 - PROPRANOLOL HCL
- 60429022718 - PROPRANOLOL HCL
- 60429022760 - PROPRANOLOL HCL
- 60429022790 - PROPRANOLOL HCL
- 60809014155 - PROPRANOLOL HCL
- 60809014172 - PROPRANOLOL HCL
- 61392001830 - PINDOLOL
- 61392001831 - PINDOLOL
- 61392001832 - PINDOLOL
- 61392001839 - PINDOLOL
- 61392001845 - PINDOLOL
- 61392001851 - PINDOLOL
- 61392001854 - PINDOLOL
- 61392001856 - PINDOLOL
- 61392001860 - PINDOLOL
- 61392001890 - PINDOLOL
- 61392039530 - PINDOLOL
- 61392039531 - PINDOLOL
- 61392039532 - PINDOLOL
- 61392039539 - PINDOLOL
- 61392039545 - PINDOLOL
- 61392039551 - PINDOLOL
- 61392039554 - PINDOLOL
- 61392039556 - PINDOLOL
- 61392039560 - PINDOLOL
- 61392039590 - PINDOLOL
- 61392039591 - PINDOLOL
- 61392042030 - PROPRANOLOL HCL
- 61392042031 - PROPRANOLOL HCL
- 61392042032 - PROPRANOLOL HCL
- 61392042034 - PROPRANOLOL HCL
- 61392042039 - PROPRANOLOL HCL
- 61392042045 - PROPRANOLOL HCL
- 61392042051 - PROPRANOLOL HCL
- 61392042054 - PROPRANOLOL HCL
- 61392042056 - PROPRANOLOL HCL
- 61392042060 - PROPRANOLOL HCL
- 61392042090 - PROPRANOLOL HCL
- 61392042091 - PROPRANOLOL HCL
- 61392042130 - PROPRANOLOL HCL
- 61392042131 - PROPRANOLOL HCL
- 61392042132 - PROPRANOLOL HCL

- 61392042139 - PROPRANOLOL HCL
- 61392042145 - PROPRANOLOL HCL
- 61392042151 - PROPRANOLOL HCL
- 61392042154 - PROPRANOLOL HCL
- 61392042160 - PROPRANOLOL HCL
- 61392042190 - PROPRANOLOL HCL
- 61392042191 - PROPRANOLOL HCL
- 61392042230 - PROPRANOLOL HCL
- 61392042231 - PROPRANOLOL HCL
- 61392042232 - PROPRANOLOL HCL
- 61392042239 - PROPRANOLOL HCL
- 61392042245 - PROPRANOLOL HCL
- 61392042251 - PROPRANOLOL HCL
- 61392042254 - PROPRANOLOL HCL
- 61392042260 - PROPRANOLOL HCL
- 61392042290 - PROPRANOLOL HCL
- 61392042330 - PROPRANOLOL HCL
- 61392042331 - PROPRANOLOL HCL
- 61392042332 - PROPRANOLOL HCL
- 61392042334 - PROPRANOLOL HCL
- 61392042339 - PROPRANOLOL HCL
- 61392042345 - PROPRANOLOL HCL
- 61392042351 - PROPRANOLOL HCL
- 61392042354 - PROPRANOLOL HCL
- 61392042356 - PROPRANOLOL HCL
- 61392042360 - PROPRANOLOL HCL
- 61392042390 - PROPRANOLOL HCL
- 61392042391 - PROPRANOLOL HCL
- 62584084201 - PROPRANOLOL HCL
- 62584084233 - PROPRANOLOL HCL
- 62584084280 - PROPRANOLOL HCL
- 62584084285 - PROPRANOLOL HCL
- 62584084301 - PROPRANOLOL HCL
- 62584084333 - PROPRANOLOL HCL
- 62584084385 - PROPRANOLOL HCL
- 62939711201 - PROPRANOLOL HCL
- 62939712201 - PROPRANOLOL HCL
- 62939713201 - PROPRANOLOL HCL
- 62939714201 - PROPRANOLOL HCL
- 63629142301 - PROPRANOLOL HCL
- 63629142302 - PROPRANOLOL HCL
- 63629184201 - PROPRANOLOL HCL
- 63629257001 - PROPRANOLOL HCL
- 63629257002 - PROPRANOLOL HCL
- 63629257003 - PROPRANOLOL HCL
- 63629257004 - PROPRANOLOL HCL

- 63739021601 - PROPRANOLOL HCL
- 63739021602 - PROPRANOLOL HCL
- 63739021603 - PROPRANOLOL HCL
- 63739021701 - PROPRANOLOL HCL
- 63739021702 - PROPRANOLOL HCL
- 63739021703 - PROPRANOLOL HCL
- 63874036801 - PROPRANOLOL HCL
- 63874036815 - PROPRANOLOL HCL
- 63874036820 - PROPRANOLOL HCL
- 63874036828 - PROPRANOLOL HCL
- 63874036830 - PROPRANOLOL HCL
- 63874036860 - PROPRANOLOL HCL
- 63874045401 - PROPRANOLOL HCL
- 63874045404 - PROPRANOLOL HCL
- 63874045415 - PROPRANOLOL HCL
- 63874045420 - PROPRANOLOL HCL
- 63874045430 - PROPRANOLOL HCL
- 63874045460 - PROPRANOLOL HCL
- 68084020901 - PROPRANOLOL HCL
- 68084020911 - PROPRANOLOL HCL
- 68084021001 - PROPRANOLOL HCL
- 68084021011 - PROPRANOLOL HCL
- 68084021101 - PROPRANOLOL HCL
- 68084021111 - PROPRANOLOL HCL
- 68084021201 - PROPRANOLOL HCL
- 68084021211 - PROPRANOLOL HCL
- 68084050301 - PROPRANOLOL HCL
- 68084050311 - PROPRANOLOL HCL
- 68084050401 - PROPRANOLOL HCL
- 68084050411 - PROPRANOLOL HCL
- 68115030760 - PROPRANOLOL HCL
- 68115030860 - PROPRANOLOL HCL
- 68115030899 - PROPRANOLOL HCL
- 00003075050 - PROPRANOLOL HCL
- 00003076550 - PROPRANOLOL HCL
- 00005310223 - PROPRANOLOL HCL
- 00005310231 - PROPRANOLOL HCL
- 00005311223 - PROPRANOLOL HCL
- 00005311231 - PROPRANOLOL HCL
- 00006005968 - TIMOLOL MALEATE
- 00006013628 - TIMOLOL MALEATE
- 00006013668 - TIMOLOL MALEATE
- 00006043768 - TIMOLOL MALEATE
- 00024128906 - METOPROLOL TARTRATE
- 00025093131 - PROPRANOLOL HCL
- 00025093151 - PROPRANOLOL HCL

- 00028007101 - METOPROLOL TARTRATE
- 00028007110 - METOPROLOL TARTRATE
- 00028007161 - METOPROLOL TARTRATE
- 00028007165 - METOPROLOL TARTRATE
- 00028007173 - METOPROLOL TARTRATE
- 00028420112 - METOPROLOL TARTRATE
- 00028420133 - METOPROLOL TARTRATE
- 00028420212 - METOPROLOL TARTRATE
- 00046042480 - PROPRANOLOL HCL
- 00046042481 - PROPRANOLOL HCL
- 00046042491 - PROPRANOLOL HCL
- 00046042495 - PROPRANOLOL HCL
- 00046042499 - PROPRANOLOL HCL
- 00046042681 - PROPRANOLOL HCL
- 00046042691 - PROPRANOLOL HCL
- 00046042699 - PROPRANOLOL HCL
- 00046042860 - PROPRANOLOL HCL
- 00046042861 - PROPRANOLOL HCL
- 00046042862 - PROPRANOLOL HCL
- 00046042880 - PROPRANOLOL HCL
- 00046042881 - PROPRANOLOL HCL
- 00046042891 - PROPRANOLOL HCL
- 00046042895 - PROPRANOLOL HCL
- 00046042899 - PROPRANOLOL HCL
- 00046043981 - PROPRANOLOL HCL
- 00046043991 - PROPRANOLOL HCL
- 00046043999 - PROPRANOLOL HCL
- 00047007224 - PROPRANOLOL HCL
- 00047007232 - PROPRANOLOL HCL
- 00047007324 - PROPRANOLOL HCL
- 00047007424 - PROPRANOLOL HCL
- 00047007430 - PROPRANOLOL HCL
- 00047072424 - TIMOLOL MALEATE
- 00047072824 - TIMOLOL MALEATE
- 00047072924 - TIMOLOL MALEATE
- 00047095524 - METOPROLOL TARTRATE
- 00054476025 - PROPRANOLOL HCL
- 00054476031 - PROPRANOLOL HCL
- 00054476033 - PROPRANOLOL HCL
- 00054476125 - PROPRANOLOL HCL
- 00054476225 - PROPRANOLOL HCL
- 00054476231 - PROPRANOLOL HCL
- 00054476325 - PROPRANOLOL HCL
- 00054876025 - PROPRANOLOL HCL
- 00054876125 - PROPRANOLOL HCL
- 00054876225 - PROPRANOLOL HCL



- 00054876325 - PROPRANOLOL HCL
- 00071007224 - PROPRANOLOL HCL
- 00071007324 - PROPRANOLOL HCL
- 00071007424 - PROPRANOLOL HCL
- 00074177835 - METOPROLOL TARTRATE
- 00074228505 - METOPROLOL TARTRATE
- 00078040001 - METOPROLOL TARTRATE
- 00078045905 - METOPROLOL TARTRATE
- 00078045909 - METOPROLOL TARTRATE
- 00093064001 - PROPRANOLOL HCL
- 00093064010 - PROPRANOLOL HCL
- 00093068001 - PROPRANOLOL HCL
- 00093068005 - PROPRANOLOL HCL
- 00093073401 - METOPROLOL TARTRATE
- 00093073410 - METOPROLOL TARTRATE
- 00102334502 - PROPRANOLOL HCL
- 00102335005 - PROPRANOLOL HCL
- 00102367001 - PROPRANOLOL HCL
- 00143150410 - PROPRANOLOL HCL
- 00143150425 - PROPRANOLOL HCL
- 00143150510 - PROPRANOLOL HCL
- 00143150525 - PROPRANOLOL HCL
- 00143150605 - PROPRANOLOL HCL
- 00143150625 - PROPRANOLOL HCL
- 00143987201 - PROPRANOLOL HCL
- 00157052810 - PROPRANOLOL HCL
- 00157052901 - PROPRANOLOL HCL
- 00157052905 - PROPRANOLOL HCL
- 00172361660 - PROPRANOLOL HCL
- 00172361680 - PROPRANOLOL HCL
- 00172361760 - PROPRANOLOL HCL
- 00172361770 - PROPRANOLOL HCL
- 00172363860 - PROPRANOLOL HCL
- 00172363870 - PROPRANOLOL HCL
- 00173079001 - PROPRANOLOL HCL
- 00173079002 - PROPRANOLOL HCL
- 00173079101 - PROPRANOLOL HCL
- 00173079102 - PROPRANOLOL HCL
- 00182176001 - PROPRANOLOL HCL
- 00182176010 - PROPRANOLOL HCL
- 00182176101 - PROPRANOLOL HCL
- 00182176201 - PROPRANOLOL HCL
- 00182176205 - PROPRANOLOL HCL
- 00182176210 - PROPRANOLOL HCL
- 00182181400 - PROPRANOLOL HCL
- 00182181401 - PROPRANOLOL HCL

- 00182181410 - PROPRANOLOL HCL
- 00182181489 - PROPRANOLOL HCL
- 00182181500 - PROPRANOLOL HCL
- 00182181501 - PROPRANOLOL HCL
- 00182181505 - PROPRANOLOL HCL
- 00182181589 - PROPRANOLOL HCL
- 00182192301 - TIMOLOL MALEATE
- 00182192401 - TIMOLOL MALEATE
- 00182192501 - TIMOLOL MALEATE
- 00182196701 - METOPROLOL TARTRATE
- 00182196710 - METOPROLOL TARTRATE
- 00182198801 - METOPROLOL TARTRATE
- 00182198810 - METOPROLOL TARTRATE
- 00182310685 - PROPRANOLOL HCL
- 00223255201 - PROPRANOLOL HCL
- 00223255202 - PROPRANOLOL HCL
- 00223255301 - PROPRANOLOL HCL
- 00223255302 - PROPRANOLOL HCL
- 00223255401 - PROPRANOLOL HCL
- 00223255402 - PROPRANOLOL HCL
- 00228232110 - PROPRANOLOL HCL
- 00228232150 - PROPRANOLOL HCL
- 00228232196 - PROPRANOLOL HCL
- 00228233110 - PROPRANOLOL HCL
- 00228233150 - PROPRANOLOL HCL
- 00228233196 - PROPRANOLOL HCL
- 00228233310 - PROPRANOLOL HCL
- 00228233350 - PROPRANOLOL HCL
- 00228255510 - METOPROLOL TARTRATE
- 00228255550 - METOPROLOL TARTRATE
- 00228255596 - METOPROLOL TARTRATE
- 00247105100 - PROPRANOLOL HCL
- 00247105130 - PROPRANOLOL HCL
- 00247112030 - METOPROLOL TARTRATE
- 00247112060 - METOPROLOL TARTRATE
- 00247116201 - PROPRANOLOL HCL
- 00302573410 - PROPRANOLOL HCL
- 00302573505 - PROPRANOLOL HCL
- 00302573601 - PROPRANOLOL HCL
- 00302697001 - TIMOLOL MALEATE
- 00302697101 - TIMOLOL MALEATE
- 00304154000 - PROPRANOLOL HCL
- 00304154001 - PROPRANOLOL HCL
- 00304154101 - PROPRANOLOL HCL
- 00304154105 - PROPRANOLOL HCL
- 00304172201 - PROPRANOLOL HCL

- 00304172205 - PROPRANOLOL HCL
- 00304204501 - TIMOLOL MALEATE
- 00304204601 - TIMOLOL MALEATE
- 00304204701 - TIMOLOL MALEATE
- 00339531912 - PROPRANOLOL HCL
- 00339532012 - PROPRANOLOL HCL
- 00339532112 - PROPRANOLOL HCL
- 00349845300 - PROPRANOLOL HCL
- 00349845301 - PROPRANOLOL HCL
- 00349845310 - PROPRANOLOL HCL
- 00349845390 - PROPRANOLOL HCL
- 00349845401 - PROPRANOLOL HCL
- 00349845405 - PROPRANOLOL HCL
- 00349868901 - TIMOLOL MALEATE
- 00349869001 - TIMOLOL MALEATE
- 00349869101 - TIMOLOL MALEATE
- 00349873601 - PROPRANOLOL HCL
- 00349873605 - PROPRANOLOL HCL
- 00349882801 - PROPRANOLOL HCL
- 00349882805 - PROPRANOLOL HCL
- 00349893810 - PROPRANOLOL HCL
- 00349895205 - PROPRANOLOL HCL
- 00364075801 - PROPRANOLOL HCL
- 00364075802 - PROPRANOLOL HCL
- 00364075890 - PROPRANOLOL HCL
- 00364075901 - PROPRANOLOL HCL
- 00364075905 - PROPRANOLOL HCL
- 00364076001 - PROPRANOLOL HCL
- 00364076005 - PROPRANOLOL HCL
- 00364076090 - PROPRANOLOL HCL
- 00364235701 - TIMOLOL MALEATE
- 00364235801 - TIMOLOL MALEATE
- 00364235901 - TIMOLOL MALEATE
- 00364256101 - METOPROLOL TARTRATE
- 00364256102 - METOPROLOL TARTRATE
- 00364303625 - METOPROLOL TARTRATE
- 00367232110 - PROPRANOLOL HCL
- 00367232150 - PROPRANOLOL HCL
- 00367232196 - PROPRANOLOL HCL
- 00367233110 - PROPRANOLOL HCL
- 00367233150 - PROPRANOLOL HCL
- 00367233196 - PROPRANOLOL HCL
- 00367233310 - PROPRANOLOL HCL
- 00367233350 - PROPRANOLOL HCL
- 00378004701 - METOPROLOL TARTRATE
- 00378004702 - METOPROLOL TARTRATE

- 00378004704 - METOPROLOL TARTRATE
- 00378004710 - METOPROLOL TARTRATE
- 00378005501 - TIMOLOL MALEATE
- 00378018401 - PROPRANOLOL HCL
- 00378018410 - PROPRANOLOL HCL
- 00378018501 - PROPRANOLOL HCL
- 00378018505 - PROPRANOLOL HCL
- 00378018510 - PROPRANOLOL HCL
- 00378018701 - PROPRANOLOL HCL
- 00378022101 - TIMOLOL MALEATE
- 00378071501 - TIMOLOL MALEATE
- 00405467401 - METOPROLOL TARTRATE
- 00405467403 - METOPROLOL TARTRATE
- 00405488601 - PROPRANOLOL HCL
- 00405488603 - PROPRANOLOL HCL
- 00405488801 - PROPRANOLOL HCL
- 00405488802 - PROPRANOLOL HCL
- 00405502001 - TIMOLOL MALEATE
- 00409177835 - METOPROLOL TARTRATE
- 00409228505 - METOPROLOL TARTRATE
- 00440778606 - METOPROLOL TARTRATE
- 00440778630 - METOPROLOL TARTRATE
- 00440778660 - METOPROLOL TARTRATE
- 00440778692 - METOPROLOL TARTRATE
- 00440778694 - METOPROLOL TARTRATE
- 00440823230 - PROPRANOLOL HCL
- 00440823290 - PROPRANOLOL HCL
- 00440823294 - PROPRANOLOL HCL
- 00440823390 - PROPRANOLOL HCL
- 00440823394 - PROPRANOLOL HCL
- 00440823490 - PROPRANOLOL HCL
- 00440823494 - PROPRANOLOL HCL
- 00469275000 - PROPRANOLOL HCL
- 00536431401 - PROPRANOLOL HCL
- 00536431405 - PROPRANOLOL HCL
- 00536431410 - PROPRANOLOL HCL
- 00536431411 - PROPRANOLOL HCL
- 00536431501 - PROPRANOLOL HCL
- 00536431601 - PROPRANOLOL HCL
- 00536431605 - PROPRANOLOL HCL
- 00536431901 - PROPRANOLOL HCL
- 00536469501 - TIMOLOL MALEATE
- 00536469601 - TIMOLOL MALEATE
- 00536469701 - TIMOLOL MALEATE
- 00536494301 - TIMOLOL MALEATE
- 00536494401 - TIMOLOL MALEATE

- 00536494501 - TIMOLOL MALEATE
- 00536560501 - METOPROLOL TARTRATE
- 00536560510 - METOPROLOL TARTRATE
- 00536563901 - METOPROLOL TARTRATE
- 00536563910 - METOPROLOL TARTRATE
- 00555036702 - PROPRANOLOL HCL
- 00555036705 - PROPRANOLOL HCL
- 00555036706 - PROPRANOLOL HCL
- 00555036802 - PROPRANOLOL HCL
- 00555036805 - PROPRANOLOL HCL
- 00555036902 - PROPRANOLOL HCL
- 00555036904 - PROPRANOLOL HCL
- 00555036905 - PROPRANOLOL HCL
- 00556040410 - PROPRANOLOL HCL
- 00580122410 - PROPRANOLOL HCL
- 00580125105 - PROPRANOLOL HCL
- 00580174701 - TIMOLOL MALEATE
- 00580174801 - TIMOLOL MALEATE
- 00580174901 - TIMOLOL MALEATE
- 00591046301 - METOPROLOL TARTRATE
- 00591046310 - METOPROLOL TARTRATE
- 00591555601 - PROPRANOLOL HCL
- 00591555603 - PROPRANOLOL HCL
- 00591555604 - PROPRANOLOL HCL
- 00591555610 - PROPRANOLOL HCL
- 00591555701 - PROPRANOLOL HCL
- 00591555703 - PROPRANOLOL HCL
- 00591555704 - PROPRANOLOL HCL
- 00591555705 - PROPRANOLOL HCL
- 00591562301 - PROPRANOLOL HCL
- 00591573601 - TIMOLOL MALEATE
- 00591573701 - TIMOLOL MALEATE
- 00591573801 - TIMOLOL MALEATE
- 00603462821 - METOPROLOL TARTRATE
- 00603462832 - METOPROLOL TARTRATE
- 00603548421 - PROPRANOLOL HCL
- 00603548432 - PROPRANOLOL HCL
- 00603548521 - PROPRANOLOL HCL
- 00603548621 - PROPRANOLOL HCL
- 00603548628 - PROPRANOLOL HCL
- 00603549132 - PROPRANOLOL HCL
- 00603549221 - PROPRANOLOL HCL
- 00603549228 - PROPRANOLOL HCL
- 00603549321 - PROPRANOLOL HCL
- 00603549328 - PROPRANOLOL HCL
- 00603549421 - PROPRANOLOL HCL

- 00603607121 - TIMOLOL MALEATE
- 00603607221 - TIMOLOL MALEATE
- 00603607321 - TIMOLOL MALEATE
- 00615256310 - PROPRANOLOL HCL
- 00615256313 - PROPRANOLOL HCL
- 00615256329 - PROPRANOLOL HCL
- 00615256332 - PROPRANOLOL HCL
- 00615256339 - PROPRANOLOL HCL
- 00615256343 - PROPRANOLOL HCL
- 00615256353 - PROPRANOLOL HCL
- 00615256363 - PROPRANOLOL HCL
- 00615256605 - PROPRANOLOL HCL
- 00615256613 - PROPRANOLOL HCL
- 00615256639 - PROPRANOLOL HCL
- 00615355313 - METOPROLOL TARTRATE
- 00615355353 - METOPROLOL TARTRATE
- 00615355363 - METOPROLOL TARTRATE
- 00641403086 - TIMOLOL MALEATE
- 00641403186 - TIMOLOL MALEATE
- 00641403286 - TIMOLOL MALEATE
- 00677104301 - PROPRANOLOL HCL
- 00677104310 - PROPRANOLOL HCL
- 00677104401 - PROPRANOLOL HCL
- 00677104405 - PROPRANOLOL HCL
- 00677104410 - PROPRANOLOL HCL
- 00677137301 - TIMOLOL MALEATE
- 00677137401 - TIMOLOL MALEATE
- 00677137501 - TIMOLOL MALEATE
- 00677148301 - METOPROLOL TARTRATE
- 00677148310 - METOPROLOL TARTRATE
- 00719179610 - PROPRANOLOL HCL
- 00719179613 - PROPRANOLOL HCL
- 00719179710 - PROPRANOLOL HCL
- 00719179810 - PROPRANOLOL HCL
- 00719179812 - PROPRANOLOL HCL
- 00719180410 - PROPRANOLOL HCL
- 00719180413 - PROPRANOLOL HCL
- 00719180510 - PROPRANOLOL HCL
- 00719180512 - PROPRANOLOL HCL
- 00719195310 - TIMOLOL MALEATE
- 00719195410 - TIMOLOL MALEATE
- 00725012501 - PROPRANOLOL HCL
- 00725012505 - PROPRANOLOL HCL
- 00725012510 - PROPRANOLOL HCL
- 00725012601 - PROPRANOLOL HCL
- 00725012605 - PROPRANOLOL HCL

- 00725012610 - PROPRANOLOL HCL
- 00725019501 - TIMOLOL MALEATE
- 00725019601 - TIMOLOL MALEATE
- 00725019701 - TIMOLOL MALEATE
- 00725206001 - PROPRANOLOL HCL
- 00725206005 - PROPRANOLOL HCL
- 00725206010 - PROPRANOLOL HCL
- 00781112601 - TIMOLOL MALEATE
- 00781112701 - TIMOLOL MALEATE
- 00781112801 - TIMOLOL MALEATE
- 00781122801 - METOPROLOL TARTRATE
- 00781122810 - METOPROLOL TARTRATE
- 00781122813 - METOPROLOL TARTRATE
- 00781136401 - PROPRANOLOL HCL
- 00781136410 - PROPRANOLOL HCL
- 00781136413 - PROPRANOLOL HCL
- 00781137201 - METOPROLOL TARTRATE
- 00781137210 - METOPROLOL TARTRATE
- 00781137213 - METOPROLOL TARTRATE
- 00781137401 - PROPRANOLOL HCL
- 00781137410 - PROPRANOLOL HCL
- 00781138401 - PROPRANOLOL HCL
- 00781138405 - PROPRANOLOL HCL
- 00781138413 - PROPRANOLOL HCL
- 00781307075 - METOPROLOL TARTRATE
- 00781307095 - METOPROLOL TARTRATE
- 00781377795 - PROPRANOLOL HCL
- 00814644514 - PROPRANOLOL HCL
- 00814644528 - PROPRANOLOL HCL
- 00814644814 - PROPRANOLOL HCL
- 00814644830 - PROPRANOLOL HCL
- 00832016700 - TIMOLOL MALEATE
- 00832106600 - TIMOLOL MALEATE
- 00832106700 - TIMOLOL MALEATE
- 00832106800 - TIMOLOL MALEATE
- 00839711606 - PROPRANOLOL HCL
- 00839711616 - PROPRANOLOL HCL
- 00839711620 - PROPRANOLOL HCL
- 00839711706 - PROPRANOLOL HCL
- 00839711712 - PROPRANOLOL HCL
- 00839711806 - PROPRANOLOL HCL
- 00839711812 - PROPRANOLOL HCL
- 00839711816 - PROPRANOLOL HCL
- 00839736006 - PROPRANOLOL HCL
- 00839758406 - TIMOLOL MALEATE
- 00839758506 - TIMOLOL MALEATE

- 00839758606 - TIMOLOL MALEATE
- 00839781006 - METOPROLOL TARTRATE
- 00839781016 - METOPROLOL TARTRATE
- 00839784206 - METOPROLOL TARTRATE
- 00839784216 - METOPROLOL TARTRATE
- 00839793606 - TIMOLOL MALEATE
- 00839793706 - TIMOLOL MALEATE
- 00904041460 - PROPRANOLOL HCL
- 00904041461 - PROPRANOLOL HCL
- 00904041470 - PROPRANOLOL HCL
- 00904041480 - PROPRANOLOL HCL
- 00904041640 - PROPRANOLOL HCL
- 00904041660 - PROPRANOLOL HCL
- 00904041840 - PROPRANOLOL HCL
- 00904041860 - PROPRANOLOL HCL
- 00904041861 - PROPRANOLOL HCL
- 00904041940 - PROPRANOLOL HCL
- 00904041960 - PROPRANOLOL HCL
- 00904340560 - TIMOLOL MALEATE
- 00904340660 - TIMOLOL MALEATE
- 00904340760 - TIMOLOL MALEATE
- 00904340860 - TIMOLOL MALEATE
- 00904340960 - TIMOLOL MALEATE
- 00904341060 - TIMOLOL MALEATE
- 00904603460 - METOPROLOL TARTRATE
- 00904603461 - METOPROLOL TARTRATE
- 00904603480 - METOPROLOL TARTRATE
- 00904634260 - METOPROLOL TARTRATE
- 00904634280 - METOPROLOL TARTRATE
- 00904777360 - METOPROLOL TARTRATE
- 00904777361 - METOPROLOL TARTRATE
- 00904777380 - METOPROLOL TARTRATE
- 00904782160 - METOPROLOL TARTRATE
- 00904782180 - METOPROLOL TARTRATE
- 00904794760 - METOPROLOL TARTRATE
- 00904794780 - METOPROLOL TARTRATE
- 11845020801 - TIMOLOL MALEATE
- 11845020901 - TIMOLOL MALEATE
- 11845021001 - TIMOLOL MALEATE
- 11845025901 - PROPRANOLOL HCL
- 11845025904 - PROPRANOLOL HCL
- 11845026001 - PROPRANOLOL HCL
- 11845026101 - PROPRANOLOL HCL
- 11845026103 - PROPRANOLOL HCL
- 12280020000 - PROPRANOLOL HCL
- 16590013230 - PROPRANOLOL HCL



- 16590013260 - PROPRANOLOL HCL
- 16590013330 - PROPRANOLOL HCL
- 16590013360 - PROPRANOLOL HCL
- 16590042830 - METOPROLOL TARTRATE
- 16590042860 - METOPROLOL TARTRATE
- 16590042872 - METOPROLOL TARTRATE
- 16590042890 - METOPROLOL TARTRATE
- 16714002304 - PROPRANOLOL HCL
- 16714002306 - PROPRANOLOL HCL
- 16714002310 - PROPRANOLOL HCL
- 16714002312 - PROPRANOLOL HCL
- 16714002404 - PROPRANOLOL HCL
- 16714002410 - PROPRANOLOL HCL
- 16714002504 - PROPRANOLOL HCL
- 16714002505 - PROPRANOLOL HCL
- 16714002510 - PROPRANOLOL HCL
- 16714002511 - PROPRANOLOL HCL
- 17236008201 - METOPROLOL TARTRATE
- 17236008210 - METOPROLOL TARTRATE
- 17236058201 - PROPRANOLOL HCL
- 17236058210 - PROPRANOLOL HCL
- 17236058301 - PROPRANOLOL HCL
- 17236058305 - PROPRANOLOL HCL
- 17236058310 - PROPRANOLOL HCL
- 17236087701 - TIMOLOL MALEATE
- 17236087801 - TIMOLOL MALEATE
- 17236087901 - TIMOLOL MALEATE
- 21695029900 - METOPROLOL TARTRATE
- 21695029930 - METOPROLOL TARTRATE
- 21695029960 - METOPROLOL TARTRATE
- 21695029978 - METOPROLOL TARTRATE
- 21695029990 - METOPROLOL TARTRATE
- 21695066930 - PROPRANOLOL HCL
- 21695066960 - PROPRANOLOL HCL
- 23155011201 - PROPRANOLOL HCL
- 23155011210 - PROPRANOLOL HCL
- 23155011301 - PROPRANOLOL HCL
- 23155011401 - PROPRANOLOL HCL
- 23155011405 - PROPRANOLOL HCL
- 23490592000 - METOPROLOL TARTRATE
- 23490592001 - METOPROLOL TARTRATE
- 23490620303 - PROPRANOLOL HCL
- 23490620306 - PROPRANOLOL HCL
- 23490620309 - PROPRANOLOL HCL
- 24090045085 - PROPRANOLOL HCL
- 24090045185 - PROPRANOLOL HCL

- 24208016601 - PROPRANOLOL HCL
- 24208016610 - PROPRANOLOL HCL
- 24208016611 - PROPRANOLOL HCL
- 24208016801 - PROPRANOLOL HCL
- 24208016811 - PROPRANOLOL HCL
- 24208016901 - PROPRANOLOL HCL
- 24208016905 - PROPRANOLOL HCL
- 24208016910 - PROPRANOLOL HCL
- 24208016911 - PROPRANOLOL HCL
- 33358024300 - METOPROLOL TARTRATE
- 33358024330 - METOPROLOL TARTRATE
- 35356078230 - METOPROLOL TARTRATE
- 35356078260 - METOPROLOL TARTRATE
- 35356078290 - METOPROLOL TARTRATE
- 35470051001 - PROPRANOLOL HCL
- 35470051009 - PROPRANOLOL HCL
- 35470051101 - PROPRANOLOL HCL
- 35470051105 - PROPRANOLOL HCL
- 35470051201 - PROPRANOLOL HCL
- 38130005101 - PROPRANOLOL HCL
- 38130005104 - PROPRANOLOL HCL
- 38779018303 - PROPRANOLOL HCL
- 38779018304 - PROPRANOLOL HCL
- 38779018305 - PROPRANOLOL HCL
- 38779018308 - PROPRANOLOL HCL
- 38779018310 - PROPRANOLOL HCL
- 38779018315 - PROPRANOLOL HCL
- 38779018325 - PROPRANOLOL HCL
- 38779018350 - PROPRANOLOL HCL
- 38779036601 - TIMOLOL MALEATE
- 38779036603 - TIMOLOL MALEATE
- 38779036605 - TIMOLOL MALEATE
- 38779036606 - TIMOLOL MALEATE
- 38779036611 - TIMOLOL MALEATE
- 38779036615 - TIMOLOL MALEATE
- 39769007501 - PROPRANOLOL HCL
- 39769007502 - PROPRANOLOL HCL
- 42254000530 - PROPRANOLOL HCL
- 43063000601 - METOPROLOL TARTRATE
- 43063000690 - METOPROLOL TARTRATE
- 43063000693 - METOPROLOL TARTRATE
- 43353070660 - PROPRANOLOL HCL
- 44514051518 - METOPROLOL TARTRATE
- 44514075888 - PROPRANOLOL HCL
- 44514075988 - PROPRANOLOL HCL
- 46703009601 - PROPRANOLOL HCL

- 46703009610 - PROPRANOLOL HCL
- 46703009701 - PROPRANOLOL HCL
- 46703009705 - PROPRANOLOL HCL
- 47202255301 - PROPRANOLOL HCL
- 47202255303 - PROPRANOLOL HCL
- 47202255401 - PROPRANOLOL HCL
- 47202255402 - PROPRANOLOL HCL
- 47202272801 - PROPRANOLOL HCL
- 47202274003 - PROPRANOLOL HCL
- 47202274101 - PROPRANOLOL HCL
- 47202274102 - PROPRANOLOL HCL
- 47202274503 - PROPRANOLOL HCL
- 47202275901 - PROPRANOLOL HCL
- 47202275902 - PROPRANOLOL HCL
- 47202276201 - PROPRANOLOL HCL
- 47202276203 - PROPRANOLOL HCL
- 47202277901 - TIMOLOL MALEATE
- 47202278001 - TIMOLOL MALEATE
- 47202287301 - PROPRANOLOL HCL
- 47202295203 - PROPRANOLOL HCL
- 47202295301 - PROPRANOLOL HCL
- 47202295402 - PROPRANOLOL HCL
- 47202295501 - PROPRANOLOL HCL
- 47679070401 - PROPRANOLOL HCL
- 47679070404 - PROPRANOLOL HCL
- 47679070435 - PROPRANOLOL HCL
- 47679070501 - PROPRANOLOL HCL
- 47679070535 - PROPRANOLOL HCL
- 47679082401 - PROPRANOLOL HCL
- 47679082435 - PROPRANOLOL HCL
- 47679082501 - PROPRANOLOL HCL
- 47679082535 - PROPRANOLOL HCL
- 49452608901 - PROPRANOLOL HCL
- 49452608902 - PROPRANOLOL HCL
- 49452608903 - PROPRANOLOL HCL
- 49452781304 - TIMOLOL MALEATE
- 49648154000 - PROPRANOLOL HCL
- 49648154105 - PROPRANOLOL HCL
- 49727092605 - PROPRANOLOL HCL
- 49727092704 - PROPRANOLOL HCL
- 49884010810 - PROPRANOLOL HCL
- 49884010905 - PROPRANOLOL HCL
- 49884010910 - PROPRANOLOL HCL
- 49884012701 - PROPRANOLOL HCL
- 49884012705 - PROPRANOLOL HCL
- 49884012710 - PROPRANOLOL HCL

- 49884023901 - PROPRANOLOL HCL
- 49884023905 - PROPRANOLOL HCL
- 49884023910 - PROPRANOLOL HCL
- 49884041310 - METOPROLOL TARTRATE
- 49999022600 - METOPROLOL TARTRATE
- 49999022630 - METOPROLOL TARTRATE
- 49999022660 - METOPROLOL TARTRATE
- 49999028660 - PROPRANOLOL HCL
- 50111046901 - PROPRANOLOL HCL
- 50111046903 - PROPRANOLOL HCL
- 50111046907 - PROPRANOLOL HCL
- 50111047001 - PROPRANOLOL HCL
- 50111047002 - PROPRANOLOL HCL
- 50111047101 - PROPRANOLOL HCL
- 50111047102 - PROPRANOLOL HCL
- 50111047201 - PROPRANOLOL HCL
- 50111047202 - PROPRANOLOL HCL
- 50111085601 - METOPROLOL TARTRATE
- 50111085603 - METOPROLOL TARTRATE
- 50742010901 - METOPROLOL TARTRATE
- 50742010910 - METOPROLOL TARTRATE
- 50752030905 - METOPROLOL TARTRATE
- 51079027901 - PROPRANOLOL HCL
- 51079027920 - PROPRANOLOL HCL
- 51079028001 - PROPRANOLOL HCL
- 51079028020 - PROPRANOLOL HCL
- 51079080201 - METOPROLOL TARTRATE
- 51079080217 - METOPROLOL TARTRATE
- 51079080219 - METOPROLOL TARTRATE
- 51079080220 - METOPROLOL TARTRATE
- 51138010830 - METOPROLOL TARTRATE
- 51138010930 - METOPROLOL TARTRATE
- 51138011730 - METOPROLOL TARTRATE
- 51138012030 - METOPROLOL TARTRATE
- 51138015930 - METOPROLOL TARTRATE
- 51138041530 - PROPRANOLOL HCL
- 51138041620 - PROPRANOLOL HCL
- 51138041630 - PROPRANOLOL HCL
- 51138041730 - PROPRANOLOL HCL
- 51285031902 - PROPRANOLOL HCL
- 51285031904 - PROPRANOLOL HCL
- 51285032002 - PROPRANOLOL HCL
- 51285032004 - PROPRANOLOL HCL
- 51285032005 - PROPRANOLOL HCL
- 51285032302 - PROPRANOLOL HCL
- 51285032305 - PROPRANOLOL HCL

- 51285032309 - PROPRANOLOL HCL
- 51285032402 - PROPRANOLOL HCL
- 51285032404 - PROPRANOLOL HCL
- 51432052303 - PROPRANOLOL HCL
- 51432056703 - TIMOLOL MALEATE
- 51432056903 - TIMOLOL MALEATE
- 51432057103 - TIMOLOL MALEATE
- 51432097306 - PROPRANOLOL HCL
- 51432097403 - PROPRANOLOL HCL
- 51432097405 - PROPRANOLOL HCL
- 51432097505 - PROPRANOLOL HCL
- 51552043301 - TIMOLOL MALEATE
- 51552043309 - TIMOLOL MALEATE
- 51552091004 - PROPRANOLOL HCL
- 51552091005 - PROPRANOLOL HCL
- 51655034924 - PROPRANOLOL HCL
- 51728083910 - PROPRANOLOL HCL
- 51728084005 - PROPRANOLOL HCL
- 51927160600 - PROPRANOLOL HCL
- 51927200300 - TIMOLOL MALEATE
- 52189021624 - PROPRANOLOL HCL
- 52189021629 - PROPRANOLOL HCL
- 52189021630 - PROPRANOLOL HCL
- 52189021724 - PROPRANOLOL HCL
- 52189021729 - PROPRANOLOL HCL
- 52189021730 - PROPRANOLOL HCL
- 52189021824 - PROPRANOLOL HCL
- 52189021829 - PROPRANOLOL HCL
- 52189021830 - PROPRANOLOL HCL
- 52189021924 - PROPRANOLOL HCL
- 52189021929 - PROPRANOLOL HCL
- 52189021930 - PROPRANOLOL HCL
- 52273027301 - TIMOLOL MALEATE
- 52273027401 - TIMOLOL MALEATE
- 52273027410 - TIMOLOL MALEATE
- 52273027501 - TIMOLOL MALEATE
- 52446040332 - PROPRANOLOL HCL
- 52446040421 - PROPRANOLOL HCL
- 52446040428 - PROPRANOLOL HCL
- 52446044921 - TIMOLOL MALEATE
- 52446045021 - TIMOLOL MALEATE
- 52446045121 - TIMOLOL MALEATE
- 52446050421 - PROPRANOLOL HCL
- 52446050428 - PROPRANOLOL HCL
- 52446050432 - PROPRANOLOL HCL
- 52446050521 - PROPRANOLOL HCL

- 52493064101 - PROPRANOLOL HCL
- 52493064130 - PROPRANOLOL HCL
- 52493064160 - PROPRANOLOL HCL
- 52493064201 - PROPRANOLOL HCL
- 52493064260 - PROPRANOLOL HCL
- 52544030701 - PROPRANOLOL HCL
- 52544030710 - PROPRANOLOL HCL
- 52544030751 - PROPRANOLOL HCL
- 52544030801 - PROPRANOLOL HCL
- 52544030805 - PROPRANOLOL HCL
- 52544035201 - PROPRANOLOL HCL
- 52544035205 - PROPRANOLOL HCL
- 52544035301 - PROPRANOLOL HCL
- 52544046301 - METOPROLOL TARTRATE
- 52544046310 - METOPROLOL TARTRATE
- 52555004001 - PROPRANOLOL HCL
- 52555004010 - PROPRANOLOL HCL
- 52555004050 - PROPRANOLOL HCL
- 52555006001 - PROPRANOLOL HCL
- 52555006005 - PROPRANOLOL HCL
- 52555008001 - PROPRANOLOL HCL
- 52555008005 - PROPRANOLOL HCL
- 52555034510 - PROPRANOLOL HCL
- 52555034601 - PROPRANOLOL HCL
- 52555050001 - METOPROLOL TARTRATE
- 52555050010 - METOPROLOL TARTRATE
- 52584018610 - PROPRANOLOL HCL
- 52584018705 - PROPRANOLOL HCL
- 52728004509 - PROPRANOLOL HCL
- 52728016410 - PROPRANOLOL HCL
- 53002049500 - PROPRANOLOL HCL
- 53002049520 - PROPRANOLOL HCL
- 53002049600 - PROPRANOLOL HCL
- 53002102600 - METOPROLOL TARTRATE
- 53002102603 - METOPROLOL TARTRATE
- 53002102630 - METOPROLOL TARTRATE
- 53258015501 - PROPRANOLOL HCL
- 53258015506 - PROPRANOLOL HCL
- 53258015513 - PROPRANOLOL HCL
- 53258015590 - PROPRANOLOL HCL
- 53258015601 - PROPRANOLOL HCL
- 53258015606 - PROPRANOLOL HCL
- 53258015613 - PROPRANOLOL HCL
- 53258015690 - PROPRANOLOL HCL
- 53445176000 - PROPRANOLOL HCL
- 53445176205 - PROPRANOLOL HCL

- 53467005130 - METOPROLOL TARTRATE
- 53467007130 - METOPROLOL TARTRATE
- 53467042401 - PROPRANOLOL HCL
- 53467042430 - PROPRANOLOL HCL
- 53467322101 - PROPRANOLOL HCL
- 53467322130 - PROPRANOLOL HCL
- 53467322160 - PROPRANOLOL HCL
- 53489036701 - METOPROLOL TARTRATE
- 53489036710 - METOPROLOL TARTRATE
- 53489045301 - PROPRANOLOL HCL
- 53489045401 - PROPRANOLOL HCL
- 53506070960 - PROPRANOLOL HCL
- 53506076030 - PROPRANOLOL HCL
- 53633032301 - PROPRANOLOL HCL
- 53633032310 - PROPRANOLOL HCL
- 53633032311 - PROPRANOLOL HCL
- 53633032316 - PROPRANOLOL HCL
- 53633032401 - PROPRANOLOL HCL
- 53633032410 - PROPRANOLOL HCL
- 53633032411 - PROPRANOLOL HCL
- 53746021979 - PROPRANOLOL HCL
- 53746022079 - PROPRANOLOL HCL
- 53978501509 - PROPRANOLOL HCL
- 54124007112 - METOPROLOL TARTRATE
- 54124007130 - METOPROLOL TARTRATE
- 54124007160 - METOPROLOL TARTRATE
- 54124036830 - PROPRANOLOL HCL
- 54124079030 - PROPRANOLOL HCL
- 54274009510 - TIMOLOL MALEATE
- 54274009610 - TIMOLOL MALEATE
- 54274009630 - TIMOLOL MALEATE
- 54274009710 - TIMOLOL MALEATE
- 54274021550 - PROPRANOLOL HCL
- 54274021610 - PROPRANOLOL HCL
- 54274021630 - PROPRANOLOL HCL
- 54274039710 - TIMOLOL MALEATE
- 54274039810 - TIMOLOL MALEATE
- 54274039910 - TIMOLOL MALEATE
- 54274061250 - PROPRANOLOL HCL
- 54274061310 - PROPRANOLOL HCL
- 54274061410 - PROPRANOLOL HCL
- 54274061430 - PROPRANOLOL HCL
- 54274061510 - PROPRANOLOL HCL
- 54523096140 - TIMOLOL MALEATE
- 54523097201 - TIMOLOL MALEATE
- 54523097240 - TIMOLOL MALEATE

- 54523097270 - TIMOLOL MALEATE
- 54523098440 - TIMOLOL MALEATE
- 54569044200 - PROPRANOLOL HCL
- 54569052000 - TIMOLOL MALEATE
- 54569056000 - PROPRANOLOL HCL
- 54569056001 - PROPRANOLOL HCL
- 54569056017 - PROPRANOLOL HCL
- 54569056050 - PROPRANOLOL HCL
- 54569056100 - PROPRANOLOL HCL
- 54569056101 - PROPRANOLOL HCL
- 54569056102 - PROPRANOLOL HCL
- 54569056103 - PROPRANOLOL HCL
- 54569056104 - PROPRANOLOL HCL
- 54569056106 - PROPRANOLOL HCL
- 54569056110 - PROPRANOLOL HCL
- 54569056132 - PROPRANOLOL HCL
- 54569056150 - PROPRANOLOL HCL
- 54569056200 - PROPRANOLOL HCL
- 54569056250 - PROPRANOLOL HCL
- 54569057800 - METOPROLOL TARTRATE
- 54569057801 - METOPROLOL TARTRATE
- 54569057802 - METOPROLOL TARTRATE
- 54569152100 - METOPROLOL TARTRATE
- 54569161901 - TIMOLOL MALEATE
- 54569249900 - PROPRANOLOL HCL
- 54569249901 - PROPRANOLOL HCL
- 54569378800 - METOPROLOL TARTRATE
- 54569378801 - METOPROLOL TARTRATE
- 54569378802 - METOPROLOL TARTRATE
- 54569378803 - METOPROLOL TARTRATE
- 54569854500 - METOPROLOL TARTRATE
- 54569854501 - METOPROLOL TARTRATE
- 54738046901 - PROPRANOLOL HCL
- 54738046903 - PROPRANOLOL HCL
- 54738047001 - PROPRANOLOL HCL
- 54738047101 - PROPRANOLOL HCL
- 54738047102 - PROPRANOLOL HCL
- 54807028201 - PROPRANOLOL HCL
- 54807028301 - PROPRANOLOL HCL
- 54812016201 - PROPRANOLOL HCL
- 54812016210 - PROPRANOLOL HCL
- 54868005300 - PROPRANOLOL HCL
- 54868005302 - PROPRANOLOL HCL
- 54868005303 - PROPRANOLOL HCL
- 54868005305 - PROPRANOLOL HCL
- 54868005306 - PROPRANOLOL HCL



- 54868005307 - PROPRANOLOL HCL
- 54868069601 - PROPRANOLOL HCL
- 54868069602 - PROPRANOLOL HCL
- 54868106300 - METOPROLOL TARTRATE
- 54868106301 - METOPROLOL TARTRATE
- 54868106302 - METOPROLOL TARTRATE
- 54868299000 - METOPROLOL TARTRATE
- 54868299002 - METOPROLOL TARTRATE
- 54868299003 - METOPROLOL TARTRATE
- 54868299004 - METOPROLOL TARTRATE
- 54868299005 - METOPROLOL TARTRATE
- 54868387300 - PROPRANOLOL HCL
- 54868539500 - PROPRANOLOL HCL
- 54868556400 - PROPRANOLOL HCL
- 54868556401 - PROPRANOLOL HCL
- 55045193909 - METOPROLOL TARTRATE
- 55081032400 - METOPROLOL TARTRATE
- 55081032401 - METOPROLOL TARTRATE
- 55081045200 - PROPRANOLOL HCL
- 55081045201 - PROPRANOLOL HCL
- 55081045202 - PROPRANOLOL HCL
- 55081045300 - PROPRANOLOL HCL
- 55081045301 - PROPRANOLOL HCL
- 55084064101 - PROPRANOLOL HCL
- 55084064130 - PROPRANOLOL HCL
- 55084064160 - PROPRANOLOL HCL
- 55084064201 - PROPRANOLOL HCL
- 55084064260 - PROPRANOLOL HCL
- 55153110801 - PROPRANOLOL HCL
- 55175160000 - PROPRANOLOL HCL
- 55175440903 - METOPROLOL TARTRATE
- 55175444706 - PROPRANOLOL HCL
- 55175444801 - PROPRANOLOL HCL
- 55175444803 - PROPRANOLOL HCL
- 55175444806 - PROPRANOLOL HCL
- 55289009330 - METOPROLOL TARTRATE
- 55289009360 - METOPROLOL TARTRATE
- 55289009390 - METOPROLOL TARTRATE
- 55289009393 - METOPROLOL TARTRATE
- 55289017130 - METOPROLOL TARTRATE
- 55289023401 - PROPRANOLOL HCL
- 55289023430 - PROPRANOLOL HCL
- 55289023460 - PROPRANOLOL HCL
- 55289023490 - PROPRANOLOL HCL
- 55370082107 - METOPROLOL TARTRATE
- 55370082108 - METOPROLOL TARTRATE

- 55390000310 - PROPRANOLOL HCL
- 55829045310 - PROPRANOLOL HCL
- 55829045410 - PROPRANOLOL HCL
- 55829045510 - PROPRANOLOL HCL
- 55887019130 - PROPRANOLOL HCL
- 55887019160 - PROPRANOLOL HCL
- 55887019190 - PROPRANOLOL HCL
- 55887019260 - PROPRANOLOL HCL
- 55887027430 - METOPROLOL TARTRATE
- 55887027490 - METOPROLOL TARTRATE
- 55947042030 - PROPRANOLOL HCL
- 55953073440 - METOPROLOL TARTRATE
- 55953073470 - METOPROLOL TARTRATE
- 55953073480 - METOPROLOL TARTRATE
- 55953096140 - TIMOLOL MALEATE
- 55953097201 - TIMOLOL MALEATE
- 55953097240 - TIMOLOL MALEATE
- 55953098440 - TIMOLOL MALEATE
- 56126032311 - PROPRANOLOL HCL
- 56126032411 - PROPRANOLOL HCL
- 56126039211 - PROPRANOLOL HCL
- 57247102400 - PROPRANOLOL HCL
- 57247102403 - PROPRANOLOL HCL
- 57247102500 - PROPRANOLOL HCL
- 57247102502 - PROPRANOLOL HCL
- 57362016111 - PROPRANOLOL HCL
- 57362016113 - PROPRANOLOL HCL
- 57362016176 - PROPRANOLOL HCL
- 57362016184 - PROPRANOLOL HCL
- 57362023111 - METOPROLOL TARTRATE
- 57362023113 - METOPROLOL TARTRATE
- 57362023184 - METOPROLOL TARTRATE
- 57362041811 - PROPRANOLOL HCL
- 57362041813 - PROPRANOLOL HCL
- 57362041884 - PROPRANOLOL HCL
- 57362063311 - PROPRANOLOL HCL
- 57362063319 - PROPRANOLOL HCL
- 57362063384 - PROPRANOLOL HCL
- 57480035701 - PROPRANOLOL HCL
- 57480035706 - PROPRANOLOL HCL
- 57480080301 - METOPROLOL TARTRATE
- 57480080306 - METOPROLOL TARTRATE
- 57664016708 - METOPROLOL TARTRATE
- 57664016718 - METOPROLOL TARTRATE
- 57664016752 - METOPROLOL TARTRATE
- 57664016758 - METOPROLOL TARTRATE

- 57866431401 - PROPRANOLOL HCL
- 57866431501 - PROPRANOLOL HCL
- 57866431601 - PROPRANOLOL HCL
- 57866657901 - METOPROLOL TARTRATE
- 57866657903 - METOPROLOL TARTRATE
- 58016000100 - PROPRANOLOL HCL
- 58016000130 - PROPRANOLOL HCL
- 58016000160 - PROPRANOLOL HCL
- 58016000190 - PROPRANOLOL HCL
- 58016053100 - PROPRANOLOL HCL
- 58016053130 - PROPRANOLOL HCL
- 58016053200 - PROPRANOLOL HCL
- 58016053202 - PROPRANOLOL HCL
- 58016053260 - PROPRANOLOL HCL
- 58016054300 - METOPROLOL TARTRATE
- 58016054360 - METOPROLOL TARTRATE
- 58016499601 - METOPROLOL TARTRATE
- 58634000501 - PROPRANOLOL HCL
- 58634000502 - PROPRANOLOL HCL
- 58864043160 - PROPRANOLOL HCL
- 58864068030 - PROPRANOLOL HCL
- 58864069530 - METOPROLOL TARTRATE
- 59591019268 - TIMOLOL MALEATE
- 59591019468 - TIMOLOL MALEATE
- 59762130201 - METOPROLOL TARTRATE
- 59762130203 - METOPROLOL TARTRATE
- 59772369302 - METOPROLOL TARTRATE
- 59772369305 - METOPROLOL TARTRATE
- 60346080630 - PROPRANOLOL HCL
- 60346080660 - PROPRANOLOL HCL
- 60346080690 - PROPRANOLOL HCL
- 60429012730 - METOPROLOL TARTRATE
- 60429012760 - METOPROLOL TARTRATE
- 60760025260 - METOPROLOL TARTRATE
- 60951078270 - TIMOLOL MALEATE
- 60951078370 - TIMOLOL MALEATE
- 61392028030 - METOPROLOL TARTRATE
- 61392028031 - METOPROLOL TARTRATE
- 61392028032 - METOPROLOL TARTRATE
- 61392028039 - METOPROLOL TARTRATE
- 61392028045 - METOPROLOL TARTRATE
- 61392028051 - METOPROLOL TARTRATE
- 61392028054 - METOPROLOL TARTRATE
- 61392028056 - METOPROLOL TARTRATE
- 61392028060 - METOPROLOL TARTRATE
- 61392028090 - METOPROLOL TARTRATE

- 61392028091 - METOPROLOL TARTRATE
- 61392042730 - PROPRANOLOL HCL
- 61392042731 - PROPRANOLOL HCL
- 61392042732 - PROPRANOLOL HCL
- 61392042739 - PROPRANOLOL HCL
- 61392042745 - PROPRANOLOL HCL
- 61392042751 - PROPRANOLOL HCL
- 61392042754 - PROPRANOLOL HCL
- 61392042756 - PROPRANOLOL HCL
- 61392042760 - PROPRANOLOL HCL
- 61392042790 - PROPRANOLOL HCL
- 61392042791 - PROPRANOLOL HCL
- 61392043030 - PROPRANOLOL HCL
- 61392043031 - PROPRANOLOL HCL
- 61392043032 - PROPRANOLOL HCL
- 61392043039 - PROPRANOLOL HCL
- 61392043045 - PROPRANOLOL HCL
- 61392043051 - PROPRANOLOL HCL
- 61392043054 - PROPRANOLOL HCL
- 61392043056 - PROPRANOLOL HCL
- 61392043060 - PROPRANOLOL HCL
- 61392043090 - PROPRANOLOL HCL
- 61392043091 - PROPRANOLOL HCL
- 62584026701 - METOPROLOL TARTRATE
- 62584026711 - METOPROLOL TARTRATE
- 62584078901 - METOPROLOL TARTRATE
- 62584084401 - PROPRANOLOL HCL
- 62584084501 - PROPRANOLOL HCL
- 62939222101 - METOPROLOL TARTRATE
- 62991173801 - PROPRANOLOL HCL
- 62991173802 - PROPRANOLOL HCL
- 62991173803 - PROPRANOLOL HCL
- 62991304101 - TIMOLOL MALEATE
- 62991304102 - TIMOLOL MALEATE
- 63304058101 - METOPROLOL TARTRATE
- 63304058110 - METOPROLOL TARTRATE
- 63323060401 - PROPRANOLOL HCL
- 63629146201 - METOPROLOL TARTRATE
- 63629146202 - METOPROLOL TARTRATE
- 63629146203 - METOPROLOL TARTRATE
- 63629358701 - PROPRANOLOL HCL
- 63629358702 - PROPRANOLOL HCL
- 63739017401 - METOPROLOL TARTRATE
- 63739017403 - METOPROLOL TARTRATE
- 63874048601 - PROPRANOLOL HCL
- 63874048615 - PROPRANOLOL HCL

- 63874048630 - PROPRANOLOL HCL
- 63874048640 - PROPRANOLOL HCL
- 63874048660 - PROPRANOLOL HCL
- 64376050301 - METOPROLOL TARTRATE
- 64376050310 - METOPROLOL TARTRATE
- 65243026503 - METOPROLOL TARTRATE
- 65726025010 - PROPRANOLOL HCL
- 65726025025 - PROPRANOLOL HCL
- 65726025110 - PROPRANOLOL HCL
- 65726025125 - PROPRANOLOL HCL
- 66860009002 - PROPRANOLOL HCL
- 68115030930 - PROPRANOLOL HCL
- 68115030960 - PROPRANOLOL HCL
- 68115030990 - PROPRANOLOL HCL
- 68115031060 - PROPRANOLOL HCL
- 68115062900 - PROPRANOLOL HCL
- 68115062930 - PROPRANOLOL HCL
- 76299042085 - PROPRANOLOL HCL
- 76299042088 - PROPRANOLOL HCL
- 76299042285 - PROPRANOLOL HCL
- 76299042288 - PROPRANOLOL HCL
- 00003504050 - ATENOLOL
- 00003504075 - ATENOLOL
- 00003524050 - ATENOLOL
- 00005321934 - ATENOLOL
- 00005321943 - ATENOLOL
- 00005322034 - ATENOLOL
- 00005322043 - ATENOLOL
- 00024128907 - METOPROLOL TARTRATE
- 00028005101 - METOPROLOL TARTRATE
- 00028005110 - METOPROLOL TARTRATE
- 00028005161 - METOPROLOL TARTRATE
- 00028005165 - METOPROLOL TARTRATE
- 00028005173 - METOPROLOL TARTRATE
- 00038010110 - ATENOLOL
- 00038010139 - ATENOLOL
- 00038010510 - ATENOLOL
- 00038010528 - ATENOLOL
- 00038010539 - ATENOLOL
- 00047095424 - METOPROLOL TARTRATE
- 00047095432 - METOPROLOL TARTRATE
- 00074177825 - METOPROLOL TARTRATE
- 00078045805 - METOPROLOL TARTRATE
- 00078045809 - METOPROLOL TARTRATE
- 00093073301 - METOPROLOL TARTRATE
- 00093073310 - METOPROLOL TARTRATE

- 00093075201 - ATENOLOL
- 00093075210 - ATENOLOL
- 00093075301 - ATENOLOL
- 00093075305 - ATENOLOL
- 00143966010 - METOPROLOL TARTRATE
- 00143987310 - METOPROLOL TARTRATE
- 00182100401 - ATENOLOL
- 00182100410 - ATENOLOL
- 00182100489 - ATENOLOL
- 00182100501 - ATENOLOL
- 00182100589 - ATENOLOL
- 00182196601 - METOPROLOL TARTRATE
- 00182196610 - METOPROLOL TARTRATE
- 00182198701 - METOPROLOL TARTRATE
- 00182198710 - METOPROLOL TARTRATE
- 00182823600 - ATENOLOL
- 00182823689 - ATENOLOL
- 00185028101 - METOPROLOL SUCCINATE
- 00185028110 - METOPROLOL SUCCINATE
- 00185028201 - METOPROLOL SUCCINATE
- 00185028210 - METOPROLOL SUCCINATE
- 00185028301 - METOPROLOL SUCCINATE
- 00185028310 - METOPROLOL SUCCINATE
- 00185028401 - METOPROLOL SUCCINATE
- 00185028410 - METOPROLOL SUCCINATE
- 00186108805 - METOPROLOL SUCCINATE
- 00186108839 - METOPROLOL SUCCINATE
- 00186109005 - METOPROLOL SUCCINATE
- 00186109039 - METOPROLOL SUCCINATE
- 00186109050 - METOPROLOL SUCCINATE
- 00186109205 - METOPROLOL SUCCINATE
- 00186109239 - METOPROLOL SUCCINATE
- 00186109405 - METOPROLOL SUCCINATE
- 00186730005 - METOPROLOL SUCCINATE
- 00186730105 - METOPROLOL SUCCINATE
- 00186730205 - METOPROLOL SUCCINATE
- 00186730305 - METOPROLOL SUCCINATE
- 00228255410 - METOPROLOL TARTRATE
- 00228255450 - METOPROLOL TARTRATE
- 00228255496 - METOPROLOL TARTRATE
- 00247101200 - ATENOLOL
- 00247106530 - METOPROLOL TARTRATE
- 00247107230 - ATENOLOL
- 00247107260 - ATENOLOL
- 00247111914 - METOPROLOL TARTRATE
- 00247111930 - METOPROLOL TARTRATE

- 00247111952 - METOPROLOL TARTRATE
- 00247111960 - METOPROLOL TARTRATE
- 00247127400 - METOPROLOL SUCCINATE
- 00247127460 - METOPROLOL SUCCINATE
- 00310010110 - ATENOLOL
- 00310010139 - ATENOLOL
- 00310010510 - ATENOLOL
- 00310010534 - ATENOLOL
- 00310010539 - ATENOLOL
- 00339572512 - ATENOLOL
- 00339572712 - ATENOLOL
- 00364251301 - ATENOLOL
- 00364251302 - ATENOLOL
- 00364251390 - ATENOLOL
- 00364251401 - ATENOLOL
- 00364251490 - ATENOLOL
- 00364256001 - METOPROLOL TARTRATE
- 00364256002 - METOPROLOL TARTRATE
- 00378001801 - METOPROLOL TARTRATE
- 00378001802 - METOPROLOL TARTRATE
- 00378001805 - METOPROLOL TARTRATE
- 00378001807 - METOPROLOL TARTRATE
- 00378001891 - METOPROLOL TARTRATE
- 00378003201 - METOPROLOL TARTRATE
- 00378003202 - METOPROLOL TARTRATE
- 00378003204 - METOPROLOL TARTRATE
- 00378003210 - METOPROLOL TARTRATE
- 00378023101 - ATENOLOL
- 00378023110 - ATENOLOL
- 00378075701 - ATENOLOL
- 00378075710 - ATENOLOL
- 00378075793 - ATENOLOL
- 00378459510 - METOPROLOL SUCCINATE
- 00378459577 - METOPROLOL SUCCINATE
- 00378459610 - METOPROLOL SUCCINATE
- 00378459677 - METOPROLOL SUCCINATE
- 00378459710 - METOPROLOL SUCCINATE
- 00378459777 - METOPROLOL SUCCINATE
- 00378459805 - METOPROLOL SUCCINATE
- 00378459877 - METOPROLOL SUCCINATE
- 00405410701 - ATENOLOL
- 00405410703 - ATENOLOL
- 00405410801 - ATENOLOL
- 00405567301 - METOPROLOL TARTRATE
- 00405567303 - METOPROLOL TARTRATE
- 00406202301 - ATENOLOL

- 00406202310 - ATENOLOL
- 00406202401 - ATENOLOL
- 00406202410 - ATENOLOL
- 00409177805 - METOPROLOL TARTRATE
- 00440717230 - ATENOLOL
- 00440717290 - ATENOLOL
- 00440778445 - METOPROLOL TARTRATE
- 00440778490 - METOPROLOL TARTRATE
- 00440778506 - METOPROLOL TARTRATE
- 00440778520 - METOPROLOL TARTRATE
- 00440778528 - METOPROLOL TARTRATE
- 00440778530 - METOPROLOL TARTRATE
- 00440778545 - METOPROLOL TARTRATE
- 00440778560 - METOPROLOL TARTRATE
- 00440778590 - METOPROLOL TARTRATE
- 00440778592 - METOPROLOL TARTRATE
- 00440778594 - METOPROLOL TARTRATE
- 00517135501 - METOPROLOL TARTRATE
- 00517135525 - METOPROLOL TARTRATE
- 00536333101 - ATENOLOL
- 00536560401 - METOPROLOL TARTRATE
- 00536560410 - METOPROLOL TARTRATE
- 00536563801 - METOPROLOL TARTRATE
- 00536563810 - METOPROLOL TARTRATE
- 00591046201 - METOPROLOL TARTRATE
- 00591046210 - METOPROLOL TARTRATE
- 00591319578 - METOPROLOL TARTRATE
- 00591577801 - ATENOLOL
- 00603237221 - ATENOLOL
- 00603462721 - METOPROLOL TARTRATE
- 00603462732 - METOPROLOL TARTRATE
- 00615353313 - ATENOLOL
- 00615355213 - METOPROLOL TARTRATE
- 00615355229 - METOPROLOL TARTRATE
- 00615355243 - METOPROLOL TARTRATE
- 00615355253 - METOPROLOL TARTRATE
- 00615355263 - METOPROLOL TARTRATE
- 00615355265 - METOPROLOL TARTRATE
- 00677147901 - ATENOLOL
- 00677147910 - ATENOLOL
- 00677148201 - METOPROLOL TARTRATE
- 00677148210 - METOPROLOL TARTRATE
- 00781122301 - METOPROLOL TARTRATE
- 00781122310 - METOPROLOL TARTRATE
- 00781122313 - METOPROLOL TARTRATE
- 00781137101 - METOPROLOL TARTRATE



- 00781137110 - METOPROLOL TARTRATE
- 00781137113 - METOPROLOL TARTRATE
- 00781150701 - ATENOLOL
- 00781150710 - ATENOLOL
- 00781150713 - ATENOLOL
- 00781307175 - METOPROLOL TARTRATE
- 00781307195 - METOPROLOL TARTRATE
- 00781522901 - ATENOLOL
- 00781522910 - ATENOLOL
- 00839772406 - ATENOLOL
- 00839774206 - ATENOLOL
- 00839780906 - METOPROLOL TARTRATE
- 00839780916 - METOPROLOL TARTRATE
- 00839784106 - METOPROLOL TARTRATE
- 00839784116 - METOPROLOL TARTRATE
- 00904589061 - METOPROLOL TARTRATE
- 00904603360 - METOPROLOL TARTRATE
- 00904603361 - METOPROLOL TARTRATE
- 00904603380 - METOPROLOL TARTRATE
- 00904616261 - METOPROLOL TARTRATE
- 00904616961 - METOPROLOL SUCCINATE
- 00904617061 - METOPROLOL SUCCINATE
- 00904617161 - METOPROLOL SUCCINATE
- 00904632261 - METOPROLOL SUCCINATE
- 00904632361 - METOPROLOL SUCCINATE
- 00904632461 - METOPROLOL SUCCINATE
- 00904634060 - METOPROLOL TARTRATE
- 00904634080 - METOPROLOL TARTRATE
- 00904634160 - METOPROLOL TARTRATE
- 00904634180 - METOPROLOL TARTRATE
- 00904763560 - ATENOLOL
- 00904763561 - ATENOLOL
- 00904777260 - METOPROLOL TARTRATE
- 00904777261 - METOPROLOL TARTRATE
- 00904777280 - METOPROLOL TARTRATE
- 00904782060 - METOPROLOL TARTRATE
- 00904782080 - METOPROLOL TARTRATE
- 00904794660 - METOPROLOL TARTRATE
- 00904794680 - METOPROLOL TARTRATE
- 00905572131 - ATENOLOL
- 11845049001 - ATENOLOL
- 12280004900 - METOPROLOL SUCCINATE
- 12280005000 - METOPROLOL SUCCINATE
- 12280005015 - METOPROLOL SUCCINATE
- 12280005030 - METOPROLOL SUCCINATE
- 12280017200 - METOPROLOL SUCCINATE

- 12280017230 - METOPROLOL SUCCINATE
- 15330002901 - ATENOLOL
- 15330002910 - ATENOLOL
- 16571044111 - ATENOLOL
- 16590031730 - METOPROLOL TARTRATE
- 16590031760 - METOPROLOL TARTRATE
- 16590031772 - METOPROLOL TARTRATE
- 16590031790 - METOPROLOL TARTRATE
- 16590085128 - ATENOLOL
- 16714003304 - ATENOLOL
- 16714003306 - ATENOLOL
- 17236008101 - METOPROLOL TARTRATE
- 17236008110 - METOPROLOL TARTRATE
- 21695029130 - METOPROLOL SUCCINATE
- 21695029830 - METOPROLOL TARTRATE
- 21695029860 - METOPROLOL TARTRATE
- 21695029878 - METOPROLOL TARTRATE
- 21695029890 - METOPROLOL TARTRATE
- 21695032400 - ATENOLOL
- 21695032430 - ATENOLOL
- 21695049430 - METOPROLOL TARTRATE
- 21695049460 - METOPROLOL TARTRATE
- 21695049478 - METOPROLOL TARTRATE
- 21695049490 - METOPROLOL TARTRATE
- 21695095030 - METOPROLOL SUCCINATE
- 21695095060 - METOPROLOL SUCCINATE
- 21695095090 - METOPROLOL SUCCINATE
- 21695097230 - METOPROLOL SUCCINATE
- 23490509601 - ATENOLOL
- 23490509602 - ATENOLOL
- 23490509603 - ATENOLOL
- 23490592101 - METOPROLOL TARTRATE
- 23490592102 - METOPROLOL TARTRATE
- 23629015510 - METOPROLOL TARTRATE
- 23629015610 - METOPROLOL TARTRATE
- 23629018010 - METOPROLOL SUCCINATE
- 23629018110 - METOPROLOL SUCCINATE
- 25021030305 - METOPROLOL TARTRATE
- 33358003900 - ATENOLOL
- 33358003930 - ATENOLOL
- 33358024200 - METOPROLOL TARTRATE
- 33358024201 - METOPROLOL TARTRATE
- 33358024230 - METOPROLOL TARTRATE
- 33358024260 - METOPROLOL TARTRATE
- 33358024290 - METOPROLOL TARTRATE
- 35356041530 - METOPROLOL TARTRATE

- 35356088860 - METOPROLOL SUCCINATE
- 35356088890 - METOPROLOL SUCCINATE
- 35356088930 - METOPROLOL TARTRATE
- 35356088960 - METOPROLOL TARTRATE
- 35356088990 - METOPROLOL TARTRATE
- 35356089830 - METOPROLOL SUCCINATE
- 35356089860 - METOPROLOL SUCCINATE
- 35356089890 - METOPROLOL SUCCINATE
- 35356093430 - METOPROLOL SUCCINATE
- 35356093460 - METOPROLOL SUCCINATE
- 35356093490 - METOPROLOL SUCCINATE
- 36000003310 - METOPROLOL TARTRATE
- 38779057804 - METOPROLOL TARTRATE
- 38779057805 - METOPROLOL TARTRATE
- 38779057808 - METOPROLOL TARTRATE
- 38779057810 - METOPROLOL TARTRATE
- 38779057825 - METOPROLOL TARTRATE
- 38779057850 - METOPROLOL TARTRATE
- 42254004630 - ATENOLOL
- 42254004690 - ATENOLOL
- 42254027330 - METOPROLOL SUCCINATE
- 42254027390 - METOPROLOL SUCCINATE
- 42291014218 - ATENOLOL
- 42291014245 - ATENOLOL
- 42291014250 - ATENOLOL
- 42291014290 - ATENOLOL
- 43063006406 - METOPROLOL TARTRATE
- 43063021030 - METOPROLOL SUCCINATE
- 43063021090 - METOPROLOL SUCCINATE
- 43063021130 - METOPROLOL SUCCINATE
- 43063021190 - METOPROLOL SUCCINATE
- 43063031630 - ATENOLOL
- 43063031690 - ATENOLOL
- 43063039830 - METOPROLOL TARTRATE
- 43063039890 - METOPROLOL TARTRATE
- 43063039893 - METOPROLOL TARTRATE
- 43063039894 - METOPROLOL TARTRATE
- 43063044090 - METOPROLOL TARTRATE
- 43353013445 - METOPROLOL SUCCINATE
- 43353013460 - METOPROLOL SUCCINATE
- 43353017330 - METOPROLOL SUCCINATE
- 43353017342 - METOPROLOL SUCCINATE
- 43353017345 - METOPROLOL SUCCINATE
- 43353017360 - METOPROLOL SUCCINATE
- 43353017380 - METOPROLOL SUCCINATE
- 43353034830 - METOPROLOL SUCCINATE

- 43353034845 - METOPROLOL SUCCINATE
- 43353057645 - METOPROLOL TARTRATE
- 43353057653 - METOPROLOL TARTRATE
- 43353057660 - METOPROLOL TARTRATE
- 43353057670 - METOPROLOL TARTRATE
- 43353057680 - METOPROLOL TARTRATE
- 43353057692 - METOPROLOL TARTRATE
- 43353058330 - METOPROLOL SUCCINATE
- 43353058345 - METOPROLOL SUCCINATE
- 43353058360 - METOPROLOL SUCCINATE
- 43353079560 - METOPROLOL SUCCINATE
- 44514051418 - METOPROLOL TARTRATE
- 44514088518 - ATENOLOL
- 47463501430 - METOPROLOL SUCCINATE
- 47463501460 - METOPROLOL SUCCINATE
- 47463501530 - METOPROLOL SUCCINATE
- 47463501730 - METOPROLOL SUCCINATE
- 47463501930 - METOPROLOL TARTRATE
- 47463502030 - METOPROLOL TARTRATE
- 49452471801 - METOPROLOL TARTRATE
- 49452471802 - METOPROLOL TARTRATE
- 49502040101 - ATENOLOL
- 49884040401 - METOPROLOL SUCCINATE
- 49884040410 - METOPROLOL SUCCINATE
- 49884040501 - METOPROLOL SUCCINATE
- 49884040510 - METOPROLOL SUCCINATE
- 49884040601 - METOPROLOL SUCCINATE
- 49884040610 - METOPROLOL SUCCINATE
- 49884040701 - METOPROLOL SUCCINATE
- 49884040710 - METOPROLOL SUCCINATE
- 49884041210 - METOPROLOL TARTRATE
- 49884045701 - ATENOLOL
- 49884045710 - ATENOLOL
- 49999001000 - METOPROLOL TARTRATE
- 49999001030 - METOPROLOL TARTRATE
- 49999001040 - METOPROLOL TARTRATE
- 49999001060 - METOPROLOL TARTRATE
- 49999017800 - ATENOLOL
- 49999017830 - ATENOLOL
- 49999017860 - ATENOLOL
- 49999017890 - ATENOLOL
- 49999048230 - METOPROLOL SUCCINATE
- 49999048300 - METOPROLOL SUCCINATE
- 49999048330 - METOPROLOL SUCCINATE
- 49999048400 - METOPROLOL SUCCINATE
- 49999048430 - METOPROLOL SUCCINATE

- 49999057510 - METOPROLOL TARTRATE
- 49999057520 - METOPROLOL TARTRATE
- 49999057530 - METOPROLOL TARTRATE
- 49999057560 - METOPROLOL TARTRATE
- 49999057590 - METOPROLOL TARTRATE
- 49999099600 - METOPROLOL SUCCINATE
- 50111085501 - METOPROLOL TARTRATE
- 50111085503 - METOPROLOL TARTRATE
- 50111085506 - METOPROLOL TARTRATE
- 50742010301 - ATENOLOL
- 50742010310 - ATENOLOL
- 50742010701 - METOPROLOL TARTRATE
- 50742010705 - METOPROLOL TARTRATE
- 50742010801 - METOPROLOL TARTRATE
- 50742010810 - METOPROLOL TARTRATE
- 50752030805 - METOPROLOL TARTRATE
- 50752030809 - METOPROLOL TARTRATE
- 51079016901 - METOPROLOL SUCCINATE
- 51079016920 - METOPROLOL SUCCINATE
- 51079017001 - METOPROLOL SUCCINATE
- 51079017020 - METOPROLOL SUCCINATE
- 51079017101 - METOPROLOL SUCCINATE
- 51079017103 - METOPROLOL SUCCINATE
- 51079025501 - METOPROLOL TARTRATE
- 51079025517 - METOPROLOL TARTRATE
- 51079025519 - METOPROLOL TARTRATE
- 51079025520 - METOPROLOL TARTRATE
- 51079068501 - ATENOLOL
- 51079068520 - ATENOLOL
- 51079080101 - METOPROLOL TARTRATE
- 51079080117 - METOPROLOL TARTRATE
- 51079080119 - METOPROLOL TARTRATE
- 51079080120 - METOPROLOL TARTRATE
- 51079080123 - METOPROLOL TARTRATE
- 51079080124 - METOPROLOL TARTRATE
- 51079080130 - METOPROLOL TARTRATE
- 51079080156 - METOPROLOL TARTRATE
- 51079080157 - METOPROLOL TARTRATE
- 51138009830 - ATENOLOL
- 51138010530 - METOPROLOL TARTRATE
- 51138010630 - METOPROLOL TARTRATE
- 51138010730 - METOPROLOL TARTRATE
- 51138011530 - METOPROLOL TARTRATE
- 51138011630 - METOPROLOL TARTRATE
- 51138011830 - METOPROLOL TARTRATE
- 51138011930 - METOPROLOL TARTRATE

- 51138013330 - ATENOLOL
- 51138015730 - METOPROLOL TARTRATE
- 51138015830 - METOPROLOL TARTRATE
- 51138017230 - METOPROLOL SUCCINATE
- 51138017330 - METOPROLOL SUCCINATE
- 51138017430 - METOPROLOL SUCCINATE
- 51138017530 - METOPROLOL SUCCINATE
- 51138020430 - METOPROLOL SUCCINATE
- 51138020530 - METOPROLOL SUCCINATE
- 51138020630 - METOPROLOL SUCCINATE
- 51138020730 - METOPROLOL SUCCINATE
- 51138046210 - METOPROLOL SUCCINATE
- 51138046215 - METOPROLOL SUCCINATE
- 51138046230 - METOPROLOL SUCCINATE
- 51138046310 - METOPROLOL SUCCINATE
- 51138046330 - METOPROLOL SUCCINATE
- 51138046350 - METOPROLOL SUCCINATE
- 51138046410 - METOPROLOL SUCCINATE
- 51138046430 - METOPROLOL SUCCINATE
- 51138046510 - METOPROLOL SUCCINATE
- 51138046530 - METOPROLOL SUCCINATE
- 51138056510 - METOPROLOL SUCCINATE
- 51138056515 - METOPROLOL SUCCINATE
- 51138056530 - METOPROLOL SUCCINATE
- 51138056610 - METOPROLOL SUCCINATE
- 51138056630 - METOPROLOL SUCCINATE
- 51138056650 - METOPROLOL SUCCINATE
- 51138056710 - METOPROLOL SUCCINATE
- 51138056730 - METOPROLOL SUCCINATE
- 51138056810 - METOPROLOL SUCCINATE
- 51138056830 - METOPROLOL SUCCINATE
- 51285083802 - ATENOLOL
- 51285083804 - ATENOLOL
- 51285083805 - ATENOLOL
- 51552091502 - METOPROLOL TARTRATE
- 51552091504 - METOPROLOL TARTRATE
- 51655053224 - ATENOLOL
- 51655092826 - METOPROLOL TARTRATE
- 51655092852 - METOPROLOL TARTRATE
- 51655092882 - METOPROLOL TARTRATE
- 51927269700 - METOPROLOL TARTRATE
- 52189025724 - ATENOLOL
- 52189025729 - ATENOLOL
- 52189025730 - ATENOLOL
- 52544046201 - METOPROLOL TARTRATE
- 52544046210 - METOPROLOL TARTRATE

- 52555000701 - ATENOLOL
- 52555049901 - METOPROLOL TARTRATE
- 52555049910 - METOPROLOL TARTRATE
- 52555053401 - ATENOLOL
- 52555067401 - ATENOLOL
- 52959025860 - ATENOLOL
- 52959083930 - METOPROLOL TARTRATE
- 52959083960 - METOPROLOL TARTRATE
- 53002100500 - METOPROLOL TARTRATE
- 53002100503 - METOPROLOL TARTRATE
- 53002100505 - METOPROLOL TARTRATE
- 53002100550 - METOPROLOL TARTRATE
- 53265041410 - ATENOLOL
- 53265041411 - ATENOLOL
- 53467005101 - METOPROLOL TARTRATE
- 53489036601 - METOPROLOL TARTRATE
- 53489036610 - METOPROLOL TARTRATE
- 53489053001 - ATENOLOL
- 53489053010 - ATENOLOL
- 53506074130 - METOPROLOL TARTRATE
- 54124005130 - METOPROLOL TARTRATE
- 54124005145 - METOPROLOL TARTRATE
- 54124005160 - METOPROLOL TARTRATE
- 54124078630 - ATENOLOL
- 54458030030 - METOPROLOL SUCCINATE
- 54458030031 - METOPROLOL SUCCINATE
- 54458030130 - METOPROLOL SUCCINATE
- 54458030131 - METOPROLOL SUCCINATE
- 54458030230 - METOPROLOL SUCCINATE
- 54458030231 - METOPROLOL SUCCINATE
- 54569057700 - METOPROLOL TARTRATE
- 54569057701 - METOPROLOL TARTRATE
- 54569057702 - METOPROLOL TARTRATE
- 54569057703 - METOPROLOL TARTRATE
- 54569060100 - ATENOLOL
- 54569060101 - ATENOLOL
- 54569060102 - ATENOLOL
- 54569365400 - ATENOLOL
- 54569365401 - ATENOLOL
- 54569365402 - ATENOLOL
- 54569365403 - ATENOLOL
- 54569365404 - ATENOLOL
- 54569378700 - METOPROLOL TARTRATE
- 54569378701 - METOPROLOL TARTRATE
- 54569378702 - METOPROLOL TARTRATE
- 54569378704 - METOPROLOL TARTRATE

- 54569444100 - METOPROLOL SUCCINATE
- 54569444200 - METOPROLOL SUCCINATE
- 54569471800 - METOPROLOL SUCCINATE
- 54569587000 - METOPROLOL SUCCINATE
- 54569587001 - METOPROLOL SUCCINATE
- 54569587002 - METOPROLOL SUCCINATE
- 54569595400 - METOPROLOL SUCCINATE
- 54569595401 - METOPROLOL SUCCINATE
- 54569596100 - METOPROLOL SUCCINATE
- 54569596101 - METOPROLOL SUCCINATE
- 54569596102 - METOPROLOL SUCCINATE
- 54569629800 - METOPROLOL TARTRATE
- 54569629801 - METOPROLOL TARTRATE
- 54569629802 - METOPROLOL TARTRATE
- 54569629803 - METOPROLOL TARTRATE
- 54569708000 - METOPROLOL TARTRATE
- 54569854300 - METOPROLOL TARTRATE
- 54569857400 - METOPROLOL TARTRATE
- 54569857401 - METOPROLOL TARTRATE
- 54569859000 - ATENOLOL
- 54738013501 - ATENOLOL
- 54738013503 - ATENOLOL
- 54868068501 - METOPROLOL TARTRATE
- 54868197100 - ATENOLOL
- 54868197101 - ATENOLOL
- 54868197103 - ATENOLOL
- 54868197104 - ATENOLOL
- 54868298900 - METOPROLOL TARTRATE
- 54868298902 - METOPROLOL TARTRATE
- 54868298903 - METOPROLOL TARTRATE
- 54868298904 - METOPROLOL TARTRATE
- 54868298905 - METOPROLOL TARTRATE
- 54868298906 - METOPROLOL TARTRATE
- 54868298907 - METOPROLOL TARTRATE
- 54868358700 - METOPROLOL SUCCINATE
- 54868358701 - METOPROLOL SUCCINATE
- 54868358702 - METOPROLOL SUCCINATE
- 54868358703 - METOPROLOL SUCCINATE
- 54868358704 - METOPROLOL SUCCINATE
- 54868358705 - METOPROLOL SUCCINATE
- 54868422300 - METOPROLOL SUCCINATE
- 54868422301 - METOPROLOL SUCCINATE
- 54868422302 - METOPROLOL SUCCINATE
- 54868422303 - METOPROLOL SUCCINATE
- 54868422304 - METOPROLOL SUCCINATE
- 54868466100 - METOPROLOL SUCCINATE



- 54868466101 - METOPROLOL SUCCINATE
- 54868466102 - METOPROLOL SUCCINATE
- 54868466103 - METOPROLOL SUCCINATE
- 54868502100 - METOPROLOL TARTRATE
- 54868502101 - METOPROLOL TARTRATE
- 54868502102 - METOPROLOL TARTRATE
- 54868502103 - METOPROLOL TARTRATE
- 54868502104 - METOPROLOL TARTRATE
- 54868506800 - METOPROLOL SUCCINATE
- 54868506801 - METOPROLOL SUCCINATE
- 54868506802 - METOPROLOL SUCCINATE
- 54868506803 - METOPROLOL SUCCINATE
- 54868572600 - METOPROLOL TARTRATE
- 54868572900 - METOPROLOL SUCCINATE
- 54868572901 - METOPROLOL SUCCINATE
- 54868572902 - METOPROLOL SUCCINATE
- 54868572903 - METOPROLOL SUCCINATE
- 54868572904 - METOPROLOL SUCCINATE
- 54868572905 - METOPROLOL SUCCINATE
- 54868572906 - METOPROLOL SUCCINATE
- 54868573000 - METOPROLOL SUCCINATE
- 54868573001 - METOPROLOL SUCCINATE
- 54868573002 - METOPROLOL SUCCINATE
- 54868573003 - METOPROLOL SUCCINATE
- 54868573004 - METOPROLOL SUCCINATE
- 54868573005 - METOPROLOL SUCCINATE
- 54868573100 - METOPROLOL SUCCINATE
- 54868573101 - METOPROLOL SUCCINATE
- 54868573102 - METOPROLOL SUCCINATE
- 54868573103 - METOPROLOL SUCCINATE
- 54868573104 - METOPROLOL SUCCINATE
- 54868573200 - METOPROLOL SUCCINATE
- 54921010110 - ATENOLOL
- 54921010139 - ATENOLOL
- 55045226901 - ATENOLOL
- 55045226902 - ATENOLOL
- 55045226906 - ATENOLOL
- 55045226908 - ATENOLOL
- 55045226909 - ATENOLOL
- 55045228200 - METOPROLOL TARTRATE
- 55045228206 - METOPROLOL TARTRATE
- 55045336101 - METOPROLOL SUCCINATE
- 55045376208 - METOPROLOL TARTRATE
- 55045379801 - METOPROLOL SUCCINATE
- 55081032500 - METOPROLOL TARTRATE
- 55081032501 - METOPROLOL TARTRATE

- 55081032502 - METOPROLOL TARTRATE
- 55111046601 - METOPROLOL SUCCINATE
- 55111046605 - METOPROLOL SUCCINATE
- 55111046701 - METOPROLOL SUCCINATE
- 55111046705 - METOPROLOL SUCCINATE
- 55111046801 - METOPROLOL SUCCINATE
- 55111046805 - METOPROLOL SUCCINATE
- 55111046901 - METOPROLOL SUCCINATE
- 55111046905 - METOPROLOL SUCCINATE
- 55175116300 - METOPROLOL TARTRATE
- 55289038230 - METOPROLOL TARTRATE
- 55289038293 - METOPROLOL TARTRATE
- 55289041301 - METOPROLOL TARTRATE
- 55289041328 - METOPROLOL TARTRATE
- 55289041330 - METOPROLOL TARTRATE
- 55289041360 - METOPROLOL TARTRATE
- 55289041390 - METOPROLOL TARTRATE
- 55289041393 - METOPROLOL TARTRATE
- 55289041394 - METOPROLOL TARTRATE
- 55289058730 - ATENOLOL
- 55289062730 - METOPROLOL TARTRATE
- 55289065330 - ATENOLOL
- 55289065390 - ATENOLOL
- 55289085530 - METOPROLOL SUCCINATE
- 55289090230 - METOPROLOL SUCCINATE
- 55370012407 - ATENOLOL
- 55370082007 - METOPROLOL TARTRATE
- 55370082008 - METOPROLOL TARTRATE
- 55390007310 - METOPROLOL TARTRATE
- 55390034810 - METOPROLOL TARTRATE
- 55390037310 - METOPROLOL TARTRATE
- 55806031603 - ATENOLOL
- 55806031605 - ATENOLOL
- 55887047430 - METOPROLOL TARTRATE
- 55887047460 - METOPROLOL TARTRATE
- 55887047490 - METOPROLOL TARTRATE
- 55887047492 - METOPROLOL TARTRATE
- 55953040140 - ATENOLOL
- 55953072740 - METOPROLOL TARTRATE
- 55953072770 - METOPROLOL TARTRATE
- 55953072780 - METOPROLOL TARTRATE
- 57362021811 - METOPROLOL TARTRATE
- 57362021813 - METOPROLOL TARTRATE
- 57362021884 - METOPROLOL TARTRATE
- 57480044701 - ATENOLOL
- 57480044706 - ATENOLOL

- 57480080201 - METOPROLOL TARTRATE
- 57480080206 - METOPROLOL TARTRATE
- 57664016608 - METOPROLOL TARTRATE
- 57664016618 - METOPROLOL TARTRATE
- 57664016652 - METOPROLOL TARTRATE
- 57664016658 - METOPROLOL TARTRATE
- 57664026618 - ATENOLOL
- 57664026688 - ATENOLOL
- 57664047708 - METOPROLOL TARTRATE
- 57664047718 - METOPROLOL TARTRATE
- 57664047752 - METOPROLOL TARTRATE
- 57664047758 - METOPROLOL TARTRATE
- 57664050608 - METOPROLOL TARTRATE
- 57664050618 - METOPROLOL TARTRATE
- 57664050652 - METOPROLOL TARTRATE
- 57664050658 - METOPROLOL TARTRATE
- 57866315501 - METOPROLOL TARTRATE
- 57866333101 - ATENOLOL
- 57866333102 - ATENOLOL
- 57866333103 - ATENOLOL
- 57866657801 - METOPROLOL TARTRATE
- 57866657802 - METOPROLOL TARTRATE
- 57866657803 - METOPROLOL TARTRATE
- 57866657805 - METOPROLOL TARTRATE
- 58016004500 - METOPROLOL SUCCINATE
- 58016004530 - METOPROLOL SUCCINATE
- 58016004560 - METOPROLOL SUCCINATE
- 58016004590 - METOPROLOL SUCCINATE
- 58016033200 - ATENOLOL
- 58016033230 - ATENOLOL
- 58016037300 - METOPROLOL SUCCINATE
- 58016037302 - METOPROLOL SUCCINATE
- 58016037330 - METOPROLOL SUCCINATE
- 58016037360 - METOPROLOL SUCCINATE
- 58016037390 - METOPROLOL SUCCINATE
- 58016044200 - METOPROLOL TARTRATE
- 58016044202 - METOPROLOL TARTRATE
- 58016044230 - METOPROLOL TARTRATE
- 58016044260 - METOPROLOL TARTRATE
- 58016044290 - METOPROLOL TARTRATE
- 58016044299 - METOPROLOL TARTRATE
- 58016054400 - METOPROLOL TARTRATE
- 58016056630 - ATENOLOL
- 58016056660 - ATENOLOL
- 58016064000 - METOPROLOL TARTRATE
- 58016064015 - METOPROLOL TARTRATE

- 58016064020 - METOPROLOL TARTRATE
- 58016064030 - METOPROLOL TARTRATE
- 58016077100 - ATENOLOL
- 58016077112 - ATENOLOL
- 58016077115 - ATENOLOL
- 58016077120 - ATENOLOL
- 58016077130 - ATENOLOL
- 58016077160 - ATENOLOL
- 58016097400 - METOPROLOL SUCCINATE
- 58016097430 - METOPROLOL SUCCINATE
- 58016097460 - METOPROLOL SUCCINATE
- 58016097490 - METOPROLOL SUCCINATE
- 58177029304 - METOPROLOL SUCCINATE
- 58177029309 - METOPROLOL SUCCINATE
- 58177029311 - METOPROLOL SUCCINATE
- 58177035804 - METOPROLOL SUCCINATE
- 58177035809 - METOPROLOL SUCCINATE
- 58177036804 - METOPROLOL SUCCINATE
- 58177036809 - METOPROLOL SUCCINATE
- 58177036811 - METOPROLOL SUCCINATE
- 58177036904 - METOPROLOL SUCCINATE
- 58177036909 - METOPROLOL SUCCINATE
- 58177036911 - METOPROLOL SUCCINATE
- 58517032030 - METOPROLOL TARTRATE
- 58729048701 - ATENOLOL
- 58864001601 - METOPROLOL TARTRATE
- 58864001628 - METOPROLOL TARTRATE
- 58864001630 - METOPROLOL TARTRATE
- 58864001660 - METOPROLOL TARTRATE
- 58864071730 - ATENOLOL
- 58864075930 - METOPROLOL SUCCINATE
- 58864076530 - METOPROLOL SUCCINATE
- 59591026568 - ATENOLOL
- 59762130001 - METOPROLOL TARTRATE
- 59762130003 - METOPROLOL TARTRATE
- 59762130101 - METOPROLOL TARTRATE
- 59762130103 - METOPROLOL TARTRATE
- 59772369202 - METOPROLOL TARTRATE
- 59772369205 - METOPROLOL TARTRATE
- 60346091430 - ATENOLOL
- 60346091460 - ATENOLOL
- 60346091490 - ATENOLOL
- 60346091494 - ATENOLOL
- 60429002630 - ATENOLOL
- 60429012630 - METOPROLOL TARTRATE
- 60429012660 - METOPROLOL TARTRATE

- 60429013901 - METOPROLOL SUCCINATE
- 60429013910 - METOPROLOL SUCCINATE
- 60429014001 - METOPROLOL SUCCINATE
- 60429014010 - METOPROLOL SUCCINATE
- 60429014101 - METOPROLOL SUCCINATE
- 60429014110 - METOPROLOL SUCCINATE
- 60429014145 - METOPROLOL SUCCINATE
- 60429014201 - METOPROLOL SUCCINATE
- 60429014205 - METOPROLOL SUCCINATE
- 60429014210 - METOPROLOL SUCCINATE
- 60429014245 - METOPROLOL SUCCINATE
- 60760025160 - METOPROLOL TARTRATE
- 60814071101 - ATENOLOL
- 60814071110 - ATENOLOL
- 61392028630 - METOPROLOL TARTRATE
- 61392028631 - METOPROLOL TARTRATE
- 61392028632 - METOPROLOL TARTRATE
- 61392028639 - METOPROLOL TARTRATE
- 61392028645 - METOPROLOL TARTRATE
- 61392028651 - METOPROLOL TARTRATE
- 61392028654 - METOPROLOL TARTRATE
- 61392028656 - METOPROLOL TARTRATE
- 61392028660 - METOPROLOL TARTRATE
- 61392028690 - METOPROLOL TARTRATE
- 61392028691 - METOPROLOL TARTRATE
- 61392054630 - ATENOLOL
- 61392054631 - ATENOLOL
- 61392054632 - ATENOLOL
- 61392054639 - ATENOLOL
- 61392054645 - ATENOLOL
- 61392054651 - ATENOLOL
- 61392054654 - ATENOLOL
- 61392054656 - ATENOLOL
- 61392054660 - ATENOLOL
- 61392054690 - ATENOLOL
- 61392054691 - ATENOLOL
- 62037083001 - METOPROLOL SUCCINATE
- 62037083010 - METOPROLOL SUCCINATE
- 62037083101 - METOPROLOL SUCCINATE
- 62037083110 - METOPROLOL SUCCINATE
- 62037083201 - METOPROLOL SUCCINATE
- 62037083210 - METOPROLOL SUCCINATE
- 62037083301 - METOPROLOL SUCCINATE
- 62037083310 - METOPROLOL SUCCINATE
- 62269025724 - ATENOLOL
- 62584026501 - METOPROLOL TARTRATE

- 62584026511 - METOPROLOL TARTRATE
- 62584026601 - METOPROLOL TARTRATE
- 62584026611 - METOPROLOL TARTRATE
- 62584062101 - ATENOLOL
- 62584071501 - ATENOLOL
- 62584071511 - ATENOLOL
- 62584078801 - METOPROLOL TARTRATE
- 62584078833 - METOPROLOL TARTRATE
- 62939221101 - METOPROLOL TARTRATE
- 62991289701 - METOPROLOL TARTRATE
- 62991289702 - METOPROLOL TARTRATE
- 62991289703 - METOPROLOL TARTRATE
- 63304057901 - METOPROLOL TARTRATE
- 63304057910 - METOPROLOL TARTRATE
- 63304058001 - METOPROLOL TARTRATE
- 63304058010 - METOPROLOL TARTRATE
- 63304062301 - ATENOLOL
- 63304062310 - ATENOLOL
- 63323066005 - METOPROLOL TARTRATE
- 63629146301 - METOPROLOL TARTRATE
- 63629146302 - METOPROLOL TARTRATE
- 63629146303 - METOPROLOL TARTRATE
- 63629146304 - METOPROLOL TARTRATE
- 63629146305 - METOPROLOL TARTRATE
- 63629262601 - ATENOLOL
- 63629262602 - ATENOLOL
- 63629262603 - ATENOLOL
- 63629262604 - ATENOLOL
- 63629363601 - METOPROLOL SUCCINATE
- 63629363602 - METOPROLOL SUCCINATE
- 63629409601 - METOPROLOL SUCCINATE
- 63739017301 - METOPROLOL TARTRATE
- 63739017302 - METOPROLOL TARTRATE
- 63739017303 - METOPROLOL TARTRATE
- 63739017310 - METOPROLOL TARTRATE
- 63739017315 - METOPROLOL TARTRATE
- 63739040510 - METOPROLOL TARTRATE
- 63739042810 - METOPROLOL TARTRATE
- 63739045410 - METOPROLOL SUCCINATE
- 63874038801 - ATENOLOL
- 63874038807 - ATENOLOL
- 63874038810 - ATENOLOL
- 63874038812 - ATENOLOL
- 63874038815 - ATENOLOL
- 63874038820 - ATENOLOL
- 63874038830 - ATENOLOL

- 64376050201 - METOPROLOL TARTRATE
- 64376050210 - METOPROLOL TARTRATE
- 64679073402 - METOPROLOL SUCCINATE
- 64679073403 - METOPROLOL SUCCINATE
- 64679073408 - METOPROLOL SUCCINATE
- 64679073409 - METOPROLOL SUCCINATE
- 64679073502 - METOPROLOL SUCCINATE
- 64679073503 - METOPROLOL SUCCINATE
- 64679073508 - METOPROLOL SUCCINATE
- 64679073509 - METOPROLOL SUCCINATE
- 64679073602 - METOPROLOL SUCCINATE
- 64679073603 - METOPROLOL SUCCINATE
- 64679073608 - METOPROLOL SUCCINATE
- 64679073609 - METOPROLOL SUCCINATE
- 64679073702 - METOPROLOL SUCCINATE
- 64679073703 - METOPROLOL SUCCINATE
- 64679073708 - METOPROLOL SUCCINATE
- 65243023203 - METOPROLOL TARTRATE
- 65243023206 - METOPROLOL TARTRATE
- 65243023209 - METOPROLOL TARTRATE
- 65243023212 - METOPROLOL TARTRATE
- 65243023218 - METOPROLOL TARTRATE
- 65243023245 - METOPROLOL TARTRATE
- 65243026506 - METOPROLOL TARTRATE
- 65243026509 - METOPROLOL TARTRATE
- 65243026518 - METOPROLOL TARTRATE
- 65243026545 - METOPROLOL TARTRATE
- 65243032903 - METOPROLOL TARTRATE
- 65243032909 - METOPROLOL TARTRATE
- 65243032918 - METOPROLOL TARTRATE
- 65243037909 - METOPROLOL TARTRATE
- 65243037918 - METOPROLOL TARTRATE
- 65243038209 - METOPROLOL TARTRATE
- 65243038218 - METOPROLOL TARTRATE
- 65862006201 - METOPROLOL TARTRATE
- 65862006299 - METOPROLOL TARTRATE
- 65862006301 - METOPROLOL TARTRATE
- 65862006399 - METOPROLOL TARTRATE
- 65862006401 - METOPROLOL TARTRATE
- 65862006499 - METOPROLOL TARTRATE
- 65862017001 - ATENOLOL
- 65862017099 - ATENOLOL
- 66116042130 - ATENOLOL
- 66116045530 - METOPROLOL TARTRATE
- 66116045630 - METOPROLOL TARTRATE
- 66267002930 - ATENOLOL

- 66267002960 - ATENOLOL
- 66267002990 - ATENOLOL
- 66267002991 - ATENOLOL
- 66267002992 - ATENOLOL
- 66267034630 - METOPROLOL TARTRATE
- 66267034660 - METOPROLOL TARTRATE
- 66267034690 - METOPROLOL TARTRATE
- 66267034691 - METOPROLOL TARTRATE
- 66267034692 - METOPROLOL TARTRATE
- 66267034693 - METOPROLOL TARTRATE
- 66336051430 - METOPROLOL TARTRATE
- 66336051460 - METOPROLOL TARTRATE
- 66336051490 - METOPROLOL TARTRATE
- 66336052330 - METOPROLOL TARTRATE
- 66336052360 - METOPROLOL TARTRATE
- 66336052390 - METOPROLOL TARTRATE
- 66336091430 - ATENOLOL
- 66336091460 - ATENOLOL
- 66336091490 - ATENOLOL
- 67253042209 - ATENOLOL
- 67253042210 - ATENOLOL
- 67253042211 - ATENOLOL
- 67544007630 - METOPROLOL TARTRATE
- 67544007645 - METOPROLOL TARTRATE
- 67544007653 - METOPROLOL TARTRATE
- 67544007660 - METOPROLOL TARTRATE
- 67544007670 - METOPROLOL TARTRATE
- 67544007673 - METOPROLOL TARTRATE
- 67544007680 - METOPROLOL TARTRATE
- 67544007686 - METOPROLOL TARTRATE
- 67544007692 - METOPROLOL TARTRATE
- 67544007694 - METOPROLOL TARTRATE
- 67544007753 - METOPROLOL TARTRATE
- 67544007760 - METOPROLOL TARTRATE
- 67544007770 - METOPROLOL TARTRATE
- 67544007780 - METOPROLOL TARTRATE
- 67544012230 - METOPROLOL TARTRATE
- 67544012245 - METOPROLOL TARTRATE
- 67544012253 - METOPROLOL TARTRATE
- 67544012260 - METOPROLOL TARTRATE
- 67544012270 - METOPROLOL TARTRATE
- 67544012273 - METOPROLOL TARTRATE
- 67544012280 - METOPROLOL TARTRATE
- 67544012286 - METOPROLOL TARTRATE
- 67544012292 - METOPROLOL TARTRATE
- 67544013030 - METOPROLOL TARTRATE



- 67544013045 - METOPROLOL TARTRATE
- 67544013053 - METOPROLOL TARTRATE
- 67544013060 - METOPROLOL TARTRATE
- 67544013070 - METOPROLOL TARTRATE
- 67544013080 - METOPROLOL TARTRATE
- 67544027230 - METOPROLOL TARTRATE
- 67544027245 - METOPROLOL TARTRATE
- 67544027253 - METOPROLOL TARTRATE
- 67544027260 - METOPROLOL TARTRATE
- 67544027270 - METOPROLOL TARTRATE
- 67544027273 - METOPROLOL TARTRATE
- 67544027280 - METOPROLOL TARTRATE
- 67544027286 - METOPROLOL TARTRATE
- 67544027292 - METOPROLOL TARTRATE
- 67544027294 - METOPROLOL TARTRATE
- 67544028230 - METOPROLOL SUCCINATE
- 67544028245 - METOPROLOL SUCCINATE
- 67544028282 - METOPROLOL SUCCINATE
- 67544028299 - METOPROLOL SUCCINATE
- 67544033260 - ATENOLOL
- 67544038730 - METOPROLOL TARTRATE
- 67544038760 - METOPROLOL TARTRATE
- 67544038780 - METOPROLOL TARTRATE
- 67544049145 - METOPROLOL SUCCINATE
- 67544049160 - METOPROLOL SUCCINATE
- 67544049180 - METOPROLOL SUCCINATE
- 67544049182 - METOPROLOL SUCCINATE
- 67544049199 - METOPROLOL SUCCINATE
- 67544056730 - METOPROLOL TARTRATE
- 67544056753 - METOPROLOL TARTRATE
- 67544056760 - METOPROLOL TARTRATE
- 67544056770 - METOPROLOL TARTRATE
- 67544056780 - METOPROLOL TARTRATE
- 67544056792 - METOPROLOL TARTRATE
- 67544056798 - METOPROLOL TARTRATE
- 67544057382 - METOPROLOL SUCCINATE
- 67544057399 - METOPROLOL SUCCINATE
- 67544062753 - METOPROLOL TARTRATE
- 67544062760 - METOPROLOL TARTRATE
- 67544062780 - METOPROLOL TARTRATE
- 67544091130 - METOPROLOL TARTRATE
- 67544091145 - METOPROLOL TARTRATE
- 67544091153 - METOPROLOL TARTRATE
- 67544091160 - METOPROLOL TARTRATE
- 67544091170 - METOPROLOL TARTRATE
- 67544091173 - METOPROLOL TARTRATE

- 67544091180 - METOPROLOL TARTRATE
- 67544091192 - METOPROLOL TARTRATE
- 67544091194 - METOPROLOL TARTRATE
- 67544091198 - METOPROLOL TARTRATE
- 67544116082 - METOPROLOL SUCCINATE
- 67544119999 - METOPROLOL SUCCINATE
- 67544120030 - METOPROLOL SUCCINATE
- 67544120042 - METOPROLOL SUCCINATE
- 67544120045 - METOPROLOL SUCCINATE
- 67801030430 - METOPROLOL SUCCINATE
- 67801031530 - METOPROLOL SUCCINATE
- 67801031603 - METOPROLOL SUCCINATE
- 68001011900 - METOPROLOL SUCCINATE
- 68001011903 - METOPROLOL SUCCINATE
- 68001012000 - METOPROLOL SUCCINATE
- 68001012003 - METOPROLOL SUCCINATE
- 68001012100 - METOPROLOL SUCCINATE
- 68001012103 - METOPROLOL SUCCINATE
- 68001012200 - METOPROLOL SUCCINATE
- 68001012203 - METOPROLOL SUCCINATE
- 68084030101 - METOPROLOL SUCCINATE
- 68084030111 - METOPROLOL SUCCINATE
- 68084030211 - METOPROLOL SUCCINATE
- 68084030221 - METOPROLOL SUCCINATE
- 68084030301 - METOPROLOL SUCCINATE
- 68084030311 - METOPROLOL SUCCINATE
- 68084030401 - METOPROLOL SUCCINATE
- 68084030411 - METOPROLOL SUCCINATE
- 68115003830 - ATENOLOL
- 68115023800 - METOPROLOL TARTRATE
- 68115023830 - METOPROLOL TARTRATE
- 68115023860 - METOPROLOL TARTRATE
- 68115023890 - METOPROLOL TARTRATE
- 68115023930 - METOPROLOL TARTRATE
- 68115023960 - METOPROLOL TARTRATE
- 68115023990 - METOPROLOL TARTRATE
- 68115023997 - METOPROLOL TARTRATE
- 68115041930 - METOPROLOL SUCCINATE
- 68115071500 - METOPROLOL SUCCINATE
- 68115074100 - METOPROLOL SUCCINATE
- 68258107501 - ATENOLOL
- 68258108201 - METOPROLOL TARTRATE
- 68258108301 - METOPROLOL TARTRATE
- 68258601809 - METOPROLOL SUCCINATE
- 68258601909 - METOPROLOL SUCCINATE
- 68258603309 - METOPROLOL TARTRATE

- 68258915001 - METOPROLOL TARTRATE
- 68382002401 - ATENOLOL
- 68382002410 - ATENOLOL
- 68387053930 - ATENOLOL
- 68645019059 - METOPROLOL TARTRATE
- 68645019159 - METOPROLOL TARTRATE
- 68645047754 - METOPROLOL SUCCINATE
- 68645047854 - METOPROLOL SUCCINATE
- 68645047954 - METOPROLOL SUCCINATE
- 00005321834 - ATENOLOL
- 00005321843 - ATENOLOL
- 00005381638 - BISOPROLOL FUMARATE
- 00005381738 - BISOPROLOL FUMARATE
- 00007414120 - CARVEDILOL
- 00007414155 - CARVEDILOL
- 00007414220 - CARVEDILOL
- 00007414255 - CARVEDILOL
- 00008417701 - ACEBUTOLOL HCL
- 00008417702 - ACEBUTOLOL HCL
- 00008417704 - ACEBUTOLOL HCL
- 00008417901 - ACEBUTOLOL HCL
- 00008417902 - ACEBUTOLOL HCL
- 00074226720 - LABETALOL HCL
- 00074226754 - LABETALOL HCL
- 00074233905 - LABETALOL HCL
- 00074233911 - LABETALOL HCL
- 00074233934 - LABETALOL HCL
- 00082417701 - ACEBUTOLOL HCL
- 00082417702 - ACEBUTOLOL HCL
- 00082417901 - ACEBUTOLOL HCL
- 00082417902 - ACEBUTOLOL HCL
- 00085024404 - LABETALOL HCL
- 00085024405 - LABETALOL HCL
- 00085024407 - LABETALOL HCL
- 00085024408 - LABETALOL HCL
- 00085036205 - LABETALOL HCL
- 00085036206 - LABETALOL HCL
- 00085036207 - LABETALOL HCL
- 00085036208 - LABETALOL HCL
- 00085036209 - LABETALOL HCL
- 00085043802 - LABETALOL HCL
- 00085043803 - LABETALOL HCL
- 00085043805 - LABETALOL HCL
- 00085043806 - LABETALOL HCL
- 00085075203 - LABETALOL HCL
- 00085075204 - LABETALOL HCL

- 00085075205 - LABETALOL HCL
- 00085075207 - LABETALOL HCL
- 00085075208 - LABETALOL HCL
- 00093010001 - LABETALOL HCL
- 00093010201 - LABETALOL HCL
- 00093010205 - LABETALOL HCL
- 00093010601 - LABETALOL HCL
- 00093078701 - ATENOLOL
- 00093078710 - ATENOLOL
- 00093527056 - BISOPROLOL FUMARATE
- 00093527156 - BISOPROLOL FUMARATE
- 00093729501 - CARVEDILOL
- 00093729505 - CARVEDILOL
- 00093729601 - CARVEDILOL
- 00093729605 - CARVEDILOL
- 00172436400 - LABETALOL HCL
- 00172436410 - LABETALOL HCL
- 00172436460 - LABETALOL HCL
- 00172436470 - LABETALOL HCL
- 00172436500 - LABETALOL HCL
- 00172436510 - LABETALOL HCL
- 00172436560 - LABETALOL HCL
- 00172436570 - LABETALOL HCL
- 00172436660 - LABETALOL HCL
- 00173034643 - LABETALOL HCL
- 00173034644 - LABETALOL HCL
- 00173034647 - LABETALOL HCL
- 00173034743 - LABETALOL HCL
- 00173034744 - LABETALOL HCL
- 00173034747 - LABETALOL HCL
- 00173034843 - LABETALOL HCL
- 00173034844 - LABETALOL HCL
- 00173034847 - LABETALOL HCL
- 00173035000 - LABETALOL HCL
- 00173035001 - LABETALOL HCL
- 00173035057 - LABETALOL HCL
- 00173035058 - LABETALOL HCL
- 00182100101 - ATENOLOL
- 00182100189 - ATENOLOL
- 00182262901 - ACEBUTOLOL HCL
- 00182263001 - ACEBUTOLOL HCL
- 00182820200 - LABETALOL HCL
- 00182820289 - LABETALOL HCL
- 00182820300 - LABETALOL HCL
- 00182820389 - LABETALOL HCL
- 00182823500 - ATENOLOL

- 00182823589 - ATENOLOL
- 00185001001 - LABETALOL HCL
- 00185001005 - LABETALOL HCL
- 00185011701 - LABETALOL HCL
- 00185011705 - LABETALOL HCL
- 00185011801 - LABETALOL HCL
- 00185011805 - LABETALOL HCL
- 00185077101 - BISOPROLOL FUMARATE
- 00185077130 - BISOPROLOL FUMARATE
- 00185077401 - BISOPROLOL FUMARATE
- 00185077430 - BISOPROLOL FUMARATE
- 00228217711 - CARVEDILOL
- 00228217811 - CARVEDILOL
- 00247114630 - ATENOLOL
- 00247114660 - ATENOLOL
- 00310010710 - ATENOLOL
- 00310010810 - ATENOLOL
- 00339572412 - ATENOLOL
- 00378021801 - ATENOLOL
- 00378021810 - ATENOLOL
- 00378052301 - BISOPROLOL FUMARATE
- 00378052393 - BISOPROLOL FUMARATE
- 00378052401 - BISOPROLOL FUMARATE
- 00378052493 - BISOPROLOL FUMARATE
- 00378120001 - ACEBUTOLOL HCL
- 00378140001 - ACEBUTOLOL HCL
- 00378363301 - CARVEDILOL
- 00378363302 - CARVEDILOL
- 00378363305 - CARVEDILOL
- 00378363307 - CARVEDILOL
- 00378363401 - CARVEDILOL
- 00378363402 - CARVEDILOL
- 00378363405 - CARVEDILOL
- 00378363407 - CARVEDILOL
- 00405410601 - ATENOLOL
- 00406202201 - ATENOLOL
- 00406202210 - ATENOLOL
- 00409226720 - LABETALOL HCL
- 00409226754 - LABETALOL HCL
- 00409233934 - LABETALOL HCL
- 00440717030 - ATENOLOL
- 00440717045 - ATENOLOL
- 00440717090 - ATENOLOL
- 00440717110 - ATENOLOL
- 00440717130 - ATENOLOL
- 00440717145 - ATENOLOL

- 00440717160 - ATENOLOL
- 00440717190 - ATENOLOL
- 00440717192 - ATENOLOL
- 00440768060 - LABETALOL HCL
- 00440768160 - LABETALOL HCL
- 00456140201 - NEBIVOLOL HCL
- 00456140211 - NEBIVOLOL HCL
- 00456140230 - NEBIVOLOL HCL
- 00456140263 - NEBIVOLOL HCL
- 00456140501 - NEBIVOLOL HCL
- 00456140511 - NEBIVOLOL HCL
- 00456140530 - NEBIVOLOL HCL
- 00456140563 - NEBIVOLOL HCL
- 00456141001 - NEBIVOLOL HCL
- 00456141011 - NEBIVOLOL HCL
- 00456141030 - NEBIVOLOL HCL
- 00456141063 - NEBIVOLOL HCL
- 00456142001 - NEBIVOLOL HCL
- 00456142030 - NEBIVOLOL HCL
- 00536332501 - ATENOLOL
- 00536332505 - ATENOLOL
- 00536333001 - ATENOLOL
- 00536333010 - ATENOLOL
- 00536563601 - ACEBUTOLOL HCL
- 00536563701 - ACEBUTOLOL HCL
- 00591043701 - ACEBUTOLOL HCL
- 00591043801 - ACEBUTOLOL HCL
- 00591060501 - LABETALOL HCL
- 00591060505 - LABETALOL HCL
- 00591060601 - LABETALOL HCL
- 00591060605 - LABETALOL HCL
- 00591060701 - LABETALOL HCL
- 00591577701 - ATENOLOL
- 00591577704 - ATENOLOL
- 00591577710 - ATENOLOL
- 00603204621 - ACEBUTOLOL HCL
- 00603204721 - ACEBUTOLOL HCL
- 00603237021 - ATENOLOL
- 00603237121 - ATENOLOL
- 00603237132 - ATENOLOL
- 00615353213 - ATENOLOL
- 00615353229 - ATENOLOL
- 00615353243 - ATENOLOL
- 00615353253 - ATENOLOL
- 00615353263 - ATENOLOL
- 00615353265 - ATENOLOL

- 00615353288 - ATENOLOL
- 00615354429 - ATENOLOL
- 00615354443 - ATENOLOL
- 00615354453 - ATENOLOL
- 00615354463 - ATENOLOL
- 00615354465 - ATENOLOL
- 00615354488 - ATENOLOL
- 00677147801 - ATENOLOL
- 00677147810 - ATENOLOL
- 00677163301 - ATENOLOL
- 00677163310 - ATENOLOL
- 00677170101 - LABETALOL HCL
- 00677170105 - LABETALOL HCL
- 00677170201 - LABETALOL HCL
- 00677170205 - LABETALOL HCL
- 00677170301 - LABETALOL HCL
- 00677170305 - LABETALOL HCL
- 00781107801 - ATENOLOL
- 00781107810 - ATENOLOL
- 00781150601 - ATENOLOL
- 00781150610 - ATENOLOL
- 00781150613 - ATENOLOL
- 00781522001 - ATENOLOL
- 00781522010 - ATENOLOL
- 00781522301 - CARVEDILOL
- 00781522401 - CARVEDILOL
- 00781522501 - ATENOLOL
- 00781522510 - ATENOLOL
- 00839772306 - ATENOLOL
- 00839772316 - ATENOLOL
- 00839774106 - ATENOLOL
- 00839774116 - ATENOLOL
- 00839795106 - ATENOLOL
- 00839808406 - ACEBUTOLOL HCL
- 00904513860 - ACEBUTOLOL HCL
- 00904513960 - ACEBUTOLOL HCL
- 00904539260 - ATENOLOL
- 00904539261 - ATENOLOL
- 00904539280 - ATENOLOL
- 00904587261 - CARVEDILOL
- 00904587361 - CARVEDILOL
- 00904592861 - LABETALOL HCL
- 00904592961 - LABETALOL HCL
- 00904593061 - LABETALOL HCL
- 00904609661 - CARVEDILOL
- 00904609761 - CARVEDILOL

- 00904617360 - ACEBUTOLOL HCL
- 00904630361 - CARVEDILOL
- 00904763460 - ATENOLOL
- 00904763461 - ATENOLOL
- 00904763480 - ATENOLOL
- 00905571152 - ATENOLOL
- 10019021002 - LABETALOL HCL
- 10019021004 - LABETALOL HCL
- 11845048901 - ATENOLOL
- 11845048904 - ATENOLOL
- 12280030315 - LABETALOL HCL
- 12280030330 - LABETALOL HCL
- 13107014501 - CARVEDILOL
- 13107014505 - CARVEDILOL
- 15330002501 - ATENOLOL
- 15330002510 - ATENOLOL
- 15330002801 - ATENOLOL
- 15330002810 - ATENOLOL
- 16571043011 - ATENOLOL
- 16571043111 - ATENOLOL
- 16590025630 - ATENOLOL
- 16590025660 - ATENOLOL
- 16590053330 - CARVEDILOL
- 16590053360 - CARVEDILOL
- 16590053372 - CARVEDILOL
- 16590053390 - CARVEDILOL
- 16714003104 - ATENOLOL
- 16714003106 - ATENOLOL
- 16714003204 - ATENOLOL
- 16714003206 - ATENOLOL
- 17236068630 - ATENOLOL
- 17478042020 - LABETALOL HCL
- 17478042040 - LABETALOL HCL
- 21695032230 - ATENOLOL
- 21695032290 - ATENOLOL
- 21695032330 - ATENOLOL
- 21695032360 - ATENOLOL
- 21695032390 - ATENOLOL
- 21695059200 - LABETALOL HCL
- 21695059230 - LABETALOL HCL
- 21695059260 - LABETALOL HCL
- 21695064830 - CARVEDILOL
- 21695064860 - CARVEDILOL
- 21695064878 - CARVEDILOL
- 21695066730 - BISOPROLOL FUMARATE
- 21695066790 - BISOPROLOL FUMARATE



- 21695067030 - BISOPROLOL FUMARATE
- 21695067090 - BISOPROLOL FUMARATE
- 21695098830 - LABETALOL HCL
- 21695099400 - LABETALOL HCL
- 23490509701 - ATENOLOL
- 23490509702 - ATENOLOL
- 23490509703 - ATENOLOL
- 23490509801 - ATENOLOL
- 23490509802 - ATENOLOL
- 23490937203 - CARVEDILOL
- 23490937206 - CARVEDILOL
- 23629000101 - ACEBUTOLOL HCL
- 23629000110 - ACEBUTOLOL HCL
- 23629003801 - LABETALOL HCL
- 23629003810 - LABETALOL HCL
- 23629011210 - CARVEDILOL
- 24200074048 - LABETALOL HCL
- 24200074051 - LABETALOL HCL
- 25021030020 - LABETALOL HCL
- 25021030040 - LABETALOL HCL
- 29300012601 - BISOPROLOL FUMARATE
- 29300012613 - BISOPROLOL FUMARATE
- 29300012701 - BISOPROLOL FUMARATE
- 29300012713 - BISOPROLOL FUMARATE
- 33358003700 - ATENOLOL
- 33358003730 - ATENOLOL
- 33358003760 - ATENOLOL
- 33358003800 - ATENOLOL
- 33358003830 - ATENOLOL
- 33358003860 - ATENOLOL
- 35356036230 - LABETALOL HCL
- 35356036260 - LABETALOL HCL
- 35356052600 - CARVEDILOL
- 35356052630 - CARVEDILOL
- 35356052660 - CARVEDILOL
- 35356073730 - ATENOLOL
- 35356073800 - ATENOLOL
- 35356093030 - ATENOLOL
- 35356093060 - ATENOLOL
- 35356093090 - ATENOLOL
- 38779026203 - ATENOLOL
- 38779026204 - ATENOLOL
- 38779026205 - ATENOLOL
- 38779026210 - ATENOLOL
- 38779026225 - ATENOLOL
- 38779048904 - ACEBUTOLOL HCL

- 38779048905 - ACEBUTOLOL HCL
- 38779048908 - ACEBUTOLOL HCL
- 38779048910 - ACEBUTOLOL HCL
- 38779048925 - ACEBUTOLOL HCL
- 38779048950 - ACEBUTOLOL HCL
- 38779056010 - LABETALOL HCL
- 38779056025 - LABETALOL HCL
- 38779056050 - LABETALOL HCL
- 42254010730 - ATENOLOL
- 42254010760 - ATENOLOL
- 42254010790 - ATENOLOL
- 42291010190 - ACEBUTOLOL HCL
- 42291010290 - ACEBUTOLOL HCL
- 42291014010 - ATENOLOL
- 42291014018 - ATENOLOL
- 42291014045 - ATENOLOL
- 42291014090 - ATENOLOL
- 42291014110 - ATENOLOL
- 42291014118 - ATENOLOL
- 42291014145 - ATENOLOL
- 42291014190 - ATENOLOL
- 42291022418 - CARVEDILOL
- 42291022430 - CARVEDILOL
- 42291022450 - CARVEDILOL
- 42291022460 - CARVEDILOL
- 42291022490 - CARVEDILOL
- 43063006206 - ATENOLOL
- 43063006230 - ATENOLOL
- 43063006290 - ATENOLOL
- 43063012960 - CARVEDILOL
- 43063012993 - CARVEDILOL
- 43063029730 - ATENOLOL
- 43063029790 - ATENOLOL
- 43353011130 - CARVEDILOL
- 43353011153 - CARVEDILOL
- 43353011160 - CARVEDILOL
- 43353011180 - CARVEDILOL
- 43353013330 - CARVEDILOL
- 43353013353 - CARVEDILOL
- 43353013360 - CARVEDILOL
- 43353013380 - CARVEDILOL
- 43353039960 - ATENOLOL
- 43353044030 - CARVEDILOL
- 43353044053 - CARVEDILOL
- 43353044060 - CARVEDILOL
- 43353044080 - CARVEDILOL

- 43353083260 - CARVEDILOL
- 43353083280 - CARVEDILOL
- 43353083330 - ATENOLOL
- 43353083345 - ATENOLOL
- 43353083360 - ATENOLOL
- 43353083380 - ATENOLOL
- 43353083430 - ATENOLOL
- 43353083445 - ATENOLOL
- 43353083460 - ATENOLOL
- 43353083480 - ATENOLOL
- 43547025710 - CARVEDILOL
- 43547025750 - CARVEDILOL
- 44514087618 - ATENOLOL
- 47028005401 - ATENOLOL
- 49452002001 - ATENOLOL
- 49452002002 - ATENOLOL
- 49452002003 - ATENOLOL
- 49452391102 - LABETALOL HCL
- 49502040001 - ATENOLOL
- 49884012201 - LABETALOL HCL
- 49884012205 - LABETALOL HCL
- 49884012301 - LABETALOL HCL
- 49884012305 - LABETALOL HCL
- 49884012401 - LABETALOL HCL
- 49884012405 - LABETALOL HCL
- 49884045601 - ATENOLOL
- 49884045610 - ATENOLOL
- 49884058701 - ACEBUTOLOL HCL
- 49884058801 - ACEBUTOLOL HCL
- 49884094401 - ATENOLOL
- 49884094410 - ATENOLOL
- 49999010400 - ATENOLOL
- 49999010430 - ATENOLOL
- 49999010460 - ATENOLOL
- 49999010490 - ATENOLOL
- 49999045400 - ATENOLOL
- 49999045410 - ATENOLOL
- 49999045430 - ATENOLOL
- 49999045460 - ATENOLOL
- 49999045490 - ATENOLOL
- 49999086600 - BISOPROLOL FUMARATE
- 49999087230 - CARVEDILOL
- 50268005015 - ACEBUTOLOL HCL
- 50268005115 - ACEBUTOLOL HCL
- 50742010101 - ATENOLOL
- 50742010110 - ATENOLOL

- 50742010201 - ATENOLOL
- 50742010210 - ATENOLOL
- 51079068401 - ATENOLOL
- 51079068417 - ATENOLOL
- 51079068419 - ATENOLOL
- 51079068420 - ATENOLOL
- 51079068424 - ATENOLOL
- 51079068463 - ATENOLOL
- 51079075901 - ATENOLOL
- 51079075917 - ATENOLOL
- 51079075919 - ATENOLOL
- 51079075920 - ATENOLOL
- 51079075963 - ATENOLOL
- 51079092801 - LABETALOL HCL
- 51079092820 - LABETALOL HCL
- 51079092901 - LABETALOL HCL
- 51079092920 - LABETALOL HCL
- 51079093201 - CARVEDILOL
- 51079093220 - CARVEDILOL
- 51138009630 - ATENOLOL
- 51138009730 - ATENOLOL
- 51138013130 - ATENOLOL
- 51138013230 - ATENOLOL
- 51138038630 - CARVEDILOL
- 51138045230 - NEBIVOLOL HCL
- 51138045330 - NEBIVOLOL HCL
- 51138045430 - NEBIVOLOL HCL
- 51138045530 - NEBIVOLOL HCL
- 51138045930 - LABETALOL HCL
- 51138045960 - LABETALOL HCL
- 51138046030 - LABETALOL HCL
- 51138046060 - LABETALOL HCL
- 51138046130 - LABETALOL HCL
- 51138046160 - LABETALOL HCL
- 51138046930 - CARVEDILOL
- 51138052830 - LABETALOL HCL
- 51138052930 - LABETALOL HCL
- 51138053030 - LABETALOL HCL
- 51138054130 - LABETALOL HCL
- 51138054230 - LABETALOL HCL
- 51138054330 - LABETALOL HCL
- 51285006001 - BISOPROLOL FUMARATE
- 51285006101 - BISOPROLOL FUMARATE
- 51285083602 - ATENOLOL
- 51285083604 - ATENOLOL
- 51285083605 - ATENOLOL

- 51285083702 - ATENOLOL
- 51285083704 - ATENOLOL
- 51285083705 - ATENOLOL
- 51432044903 - ATENOLOL
- 51552091404 - ATENOLOL
- 51552091405 - ATENOLOL
- 51655053024 - ATENOLOL
- 51655053053 - ATENOLOL
- 51927246700 - ATENOLOL
- 51927290600 - ACEBUTOLOL HCL
- 51927463500 - LABETALOL HCL
- 52189025624 - ATENOLOL
- 52189025629 - ATENOLOL
- 52189025630 - ATENOLOL
- 52189025924 - ATENOLOL
- 52189025929 - ATENOLOL
- 52189025930 - ATENOLOL
- 52343002901 - CARVEDILOL
- 52343002905 - CARVEDILOL
- 52544043701 - ACEBUTOLOL HCL
- 52544043801 - ACEBUTOLOL HCL
- 52544060501 - LABETALOL HCL
- 52544060505 - LABETALOL HCL
- 52544060601 - LABETALOL HCL
- 52544060605 - LABETALOL HCL
- 52544060701 - LABETALOL HCL
- 52555000601 - ATENOLOL
- 52555000610 - ATENOLOL
- 52555053101 - ATENOLOL
- 52555053110 - ATENOLOL
- 52555067301 - ATENOLOL
- 52555067310 - ATENOLOL
- 52555068901 - ATENOLOL
- 52959025300 - ATENOLOL
- 52959025320 - ATENOLOL
- 52959025330 - ATENOLOL
- 52959025340 - ATENOLOL
- 52959028030 - ATENOLOL
- 52959046301 - ATENOLOL
- 52959046330 - ATENOLOL
- 52959046360 - ATENOLOL
- 53002100400 - ATENOLOL
- 53002100403 - ATENOLOL
- 53002101000 - LABETALOL HCL
- 53002104603 - LABETALOL HCL
- 53002104606 - LABETALOL HCL

- 53002104630 - LABETALOL HCL
- 53002104660 - LABETALOL HCL
- 53265041210 - ATENOLOL
- 53265041211 - ATENOLOL
- 53265041310 - ATENOLOL
- 53265041311 - ATENOLOL
- 53467010501 - ATENOLOL
- 53467010530 - ATENOLOL
- 53467010560 - ATENOLOL
- 53489035401 - LABETALOL HCL
- 53489035405 - LABETALOL HCL
- 53489035501 - LABETALOL HCL
- 53489035505 - LABETALOL HCL
- 53489035601 - LABETALOL HCL
- 53489035605 - LABETALOL HCL
- 53489052901 - ATENOLOL
- 53489052910 - ATENOLOL
- 53489053601 - ATENOLOL
- 53489053610 - ATENOLOL
- 53489055501 - BISOPROLOL FUMARATE
- 53489055507 - BISOPROLOL FUMARATE
- 53489055601 - BISOPROLOL FUMARATE
- 53489055607 - BISOPROLOL FUMARATE
- 53506005630 - ATENOLOL
- 53506070730 - ATENOLOL
- 53506074030 - ACEBUTOLOL HCL
- 53978119905 - ATENOLOL
- 54124003815 - ATENOLOL
- 54124003830 - ATENOLOL
- 54124003860 - ATENOLOL
- 54124056960 - LABETALOL HCL
- 54124059330 - ACEBUTOLOL HCL
- 54124060230 - ACEBUTOLOL HCL
- 54124075260 - LABETALOL HCL
- 54458093105 - ATENOLOL
- 54569059000 - LABETALOL HCL
- 54569059001 - LABETALOL HCL
- 54569059002 - LABETALOL HCL
- 54569059100 - LABETALOL HCL
- 54569059101 - LABETALOL HCL
- 54569059102 - LABETALOL HCL
- 54569059400 - ACEBUTOLOL HCL
- 54569059401 - ACEBUTOLOL HCL
- 54569059402 - ACEBUTOLOL HCL
- 54569059403 - ACEBUTOLOL HCL
- 54569060000 - ATENOLOL

- 54569060001 - ATENOLOL
- 54569060002 - ATENOLOL
- 54569060003 - ATENOLOL
- 54569060500 - LABETALOL HCL
- 54569060501 - LABETALOL HCL
- 54569151600 - ACEBUTOLOL HCL
- 54569343200 - ATENOLOL
- 54569343201 - ATENOLOL
- 54569343202 - ATENOLOL
- 54569343203 - ATENOLOL
- 54569343204 - ATENOLOL
- 54569343205 - ATENOLOL
- 54569343207 - ATENOLOL
- 54569343208 - ATENOLOL
- 54569388500 - ATENOLOL
- 54569388502 - ATENOLOL
- 54569388504 - ATENOLOL
- 54569388505 - ATENOLOL
- 54569388506 - ATENOLOL
- 54569597700 - CARVEDILOL
- 54569597702 - CARVEDILOL
- 54569597704 - CARVEDILOL
- 54569611900 - NEBIVOLOL HCL
- 54569616900 - LABETALOL HCL
- 54569631400 - LABETALOL HCL
- 54569631500 - LABETALOL HCL
- 54569634200 - NEBIVOLOL HCL
- 54569634201 - NEBIVOLOL HCL
- 54569800800 - ATENOLOL
- 54569800801 - ATENOLOL
- 54569850700 - ATENOLOL
- 54569850701 - ATENOLOL
- 54569861400 - ATENOLOL
- 54738013301 - ATENOLOL
- 54738013303 - ATENOLOL
- 54738013401 - ATENOLOL
- 54738013403 - ATENOLOL
- 54868070100 - ATENOLOL
- 54868100401 - LABETALOL HCL
- 54868187100 - ATENOLOL
- 54868187101 - ATENOLOL
- 54868187102 - ATENOLOL
- 54868187104 - ATENOLOL
- 54868234901 - ATENOLOL
- 54868234902 - ATENOLOL
- 54868234903 - ATENOLOL

- 54868234904 - ATENOLOL
- 54868234905 - ATENOLOL
- 54868286400 - LABETALOL HCL
- 54868286401 - LABETALOL HCL
- 54868392000 - LABETALOL HCL
- 54868439500 - CARVEDILOL
- 54868439501 - CARVEDILOL
- 54868439502 - CARVEDILOL
- 54868439503 - CARVEDILOL
- 54868448600 - LABETALOL HCL
- 54868462100 - BISOPROLOL FUMARATE
- 54868484400 - LABETALOL HCL
- 54868484401 - LABETALOL HCL
- 54868484402 - LABETALOL HCL
- 54868484403 - LABETALOL HCL
- 54868490300 - LABETALOL HCL
- 54868490301 - LABETALOL HCL
- 54868490302 - LABETALOL HCL
- 54868492100 - LABETALOL HCL
- 54868492101 - LABETALOL HCL
- 54868492102 - LABETALOL HCL
- 54868501300 - BISOPROLOL FUMARATE
- 54868501301 - BISOPROLOL FUMARATE
- 54868509500 - BISOPROLOL FUMARATE
- 54868509501 - BISOPROLOL FUMARATE
- 54868509502 - BISOPROLOL FUMARATE
- 54868509503 - BISOPROLOL FUMARATE
- 54868552000 - ACEBUTOLOL HCL
- 54868581700 - CARVEDILOL
- 54868581701 - CARVEDILOL
- 54868581702 - CARVEDILOL
- 54868594400 - NEBIVOLOL HCL
- 54868594401 - NEBIVOLOL HCL
- 54868601800 - NEBIVOLOL HCL
- 54868601801 - NEBIVOLOL HCL
- 54921010510 - ATENOLOL
- 54921010534 - ATENOLOL
- 54921010539 - ATENOLOL
- 54921010710 - ATENOLOL
- 55045186001 - ATENOLOL
- 55045186002 - ATENOLOL
- 55045186009 - ATENOLOL
- 55045249808 - ATENOLOL
- 55081052700 - ATENOLOL
- 55081052701 - ATENOLOL
- 55081052702 - ATENOLOL



- 55111025501 - CARVEDILOL
- 55111025505 - CARVEDILOL
- 55175144100 - ATENOLOL
- 55175396009 - ATENOLOL
- 55175520001 - LABETALOL HCL
- 55289022701 - ATENOLOL
- 55289022730 - ATENOLOL
- 55289022790 - ATENOLOL
- 55289022801 - ATENOLOL
- 55289022803 - ATENOLOL
- 55289022806 - ATENOLOL
- 55289022814 - ATENOLOL
- 55289022830 - ATENOLOL
- 55289022860 - ATENOLOL
- 55289022890 - ATENOLOL
- 55289025430 - ATENOLOL
- 55370012207 - ATENOLOL
- 55370012209 - ATENOLOL
- 55390013020 - LABETALOL HCL
- 55390013040 - LABETALOL HCL
- 55806031503 - ATENOLOL
- 55806031505 - ATENOLOL
- 55887018001 - LABETALOL HCL
- 55887025930 - LABETALOL HCL
- 55887025960 - LABETALOL HCL
- 55887025982 - LABETALOL HCL
- 55887025990 - LABETALOL HCL
- 55887059930 - ATENOLOL
- 55887059990 - ATENOLOL
- 55887083801 - ATENOLOL
- 55947044030 - ATENOLOL
- 55953003940 - ATENOLOL
- 55953003980 - ATENOLOL
- 57480044601 - ATENOLOL
- 57480044606 - ATENOLOL
- 57664024713 - CARVEDILOL
- 57664024718 - CARVEDILOL
- 57664024788 - CARVEDILOL
- 57664026418 - ATENOLOL
- 57664026488 - ATENOLOL
- 57664026518 - ATENOLOL
- 57664026588 - ATENOLOL
- 57866021901 - ATENOLOL
- 57866333001 - ATENOLOL
- 57866333003 - ATENOLOL
- 57866333005 - ATENOLOL

- 57866333201 - ATENOLOL
- 57866333203 - ATENOLOL
- 57866465501 - BISOPROLOL FUMARATE
- 57866465502 - BISOPROLOL FUMARATE
- 57866662201 - LABETALOL HCL
- 57866662301 - LABETALOL HCL
- 57866706801 - BISOPROLOL FUMARATE
- 57866706802 - BISOPROLOL FUMARATE
- 58016030000 - ACEBUTOLOL HCL
- 58016030030 - ACEBUTOLOL HCL
- 58016030060 - ACEBUTOLOL HCL
- 58016030090 - ACEBUTOLOL HCL
- 58016033300 - ATENOLOL
- 58016033315 - ATENOLOL
- 58016033330 - ATENOLOL
- 58016033360 - ATENOLOL
- 58016056700 - ATENOLOL
- 58016056730 - ATENOLOL
- 58016056750 - ATENOLOL
- 58016058200 - ATENOLOL
- 58016058215 - ATENOLOL
- 58016058220 - ATENOLOL
- 58016058230 - ATENOLOL
- 58016058260 - ATENOLOL
- 58729048601 - ATENOLOL
- 58729048610 - ATENOLOL
- 58864006501 - ATENOLOL
- 58864006530 - ATENOLOL
- 58864036701 - LABETALOL HCL
- 58864036801 - LABETALOL HCL
- 58864072730 - CARVEDILOL
- 58864074930 - ATENOLOL
- 58864074990 - ATENOLOL
- 59591000768 - ATENOLOL
- 59591026368 - ATENOLOL
- 59762125801 - BISOPROLOL FUMARATE
- 59762125802 - BISOPROLOL FUMARATE
- 59762126101 - BISOPROLOL FUMARATE
- 59762126102 - BISOPROLOL FUMARATE
- 59772618002 - LABETALOL HCL
- 59772618102 - LABETALOL HCL
- 59772618202 - LABETALOL HCL
- 59772618301 - LABETALOL HCL
- 59911584201 - ACEBUTOLOL HCL
- 59911584401 - ACEBUTOLOL HCL
- 59911706001 - BISOPROLOL FUMARATE

- 59911706101 - BISOPROLOL FUMARATE
- 59930160201 - LABETALOL HCL
- 59930160202 - LABETALOL HCL
- 59930160203 - LABETALOL HCL
- 59930160204 - LABETALOL HCL
- 59930163601 - LABETALOL HCL
- 59930163602 - LABETALOL HCL
- 59930163603 - LABETALOL HCL
- 59930163604 - LABETALOL HCL
- 59930165301 - LABETALOL HCL
- 59930165302 - LABETALOL HCL
- 59930165303 - LABETALOL HCL
- 60346058760 - ATENOLOL
- 60346071930 - ATENOLOL
- 60346071960 - ATENOLOL
- 60346071962 - ATENOLOL
- 60346071990 - ATENOLOL
- 60346071994 - ATENOLOL
- 60429002530 - ATENOLOL
- 60429002590 - ATENOLOL
- 60429021130 - ATENOLOL
- 60429021190 - ATENOLOL
- 60429027701 - LABETALOL HCL
- 60429027705 - LABETALOL HCL
- 60429027801 - LABETALOL HCL
- 60429027805 - LABETALOL HCL
- 60429027901 - LABETALOL HCL
- 60505071700 - LABETALOL HCL
- 60505071701 - LABETALOL HCL
- 60505071702 - LABETALOL HCL
- 60505071703 - LABETALOL HCL
- 60505260901 - CARVEDILOL
- 60505260908 - CARVEDILOL
- 60760005930 - ATENOLOL
- 60760006030 - ATENOLOL
- 60760014560 - CARVEDILOL
- 60809010255 - ATENOLOL
- 60809010272 - ATENOLOL
- 60814071001 - ATENOLOL
- 60814071010 - ATENOLOL
- 60976034643 - LABETALOL HCL
- 60976034644 - LABETALOL HCL
- 60976034647 - LABETALOL HCL
- 60976034743 - LABETALOL HCL
- 60976034744 - LABETALOL HCL
- 60976034747 - LABETALOL HCL

- 60976034843 - LABETALOL HCL
- 60976034844 - LABETALOL HCL
- 60976034847 - LABETALOL HCL
- 60976035057 - LABETALOL HCL
- 60976035058 - LABETALOL HCL
- 61392054230 - ATENOLOL
- 61392054231 - ATENOLOL
- 61392054232 - ATENOLOL
- 61392054239 - ATENOLOL
- 61392054245 - ATENOLOL
- 61392054251 - ATENOLOL
- 61392054254 - ATENOLOL
- 61392054260 - ATENOLOL
- 61392054290 - ATENOLOL
- 61392054291 - ATENOLOL
- 61392054330 - ATENOLOL
- 61392054331 - ATENOLOL
- 61392054332 - ATENOLOL
- 61392054339 - ATENOLOL
- 61392054345 - ATENOLOL
- 61392054351 - ATENOLOL
- 61392054354 - ATENOLOL
- 61392054356 - ATENOLOL
- 61392054360 - ATENOLOL
- 61392054390 - ATENOLOL
- 61392054391 - ATENOLOL
- 61553011781 - LABETALOL HCL
- 61553011791 - LABETALOL HCL
- 61553033633 - LABETALOL HCL
- 61553033670 - LABETALOL HCL
- 61553034172 - LABETALOL HCL
- 61703023322 - LABETALOL HCL
- 61703023341 - LABETALOL HCL
- 61703023347 - LABETALOL HCL
- 61703023348 - LABETALOL HCL
- 62269025624 - ATENOLOL
- 62269025630 - ATENOLOL
- 62269025924 - ATENOLOL
- 62269025930 - ATENOLOL
- 62584046701 - ATENOLOL
- 62584046711 - ATENOLOL
- 62584046780 - ATENOLOL
- 62584046785 - ATENOLOL
- 62584061901 - ATENOLOL
- 62584061933 - ATENOLOL
- 62584062001 - ATENOLOL

- 62584062033 - ATENOLOL
- 62991100101 - ACEBUTOLOL HCL
- 62991100102 - ACEBUTOLOL HCL
- 62991100103 - ACEBUTOLOL HCL
- 62991282101 - ATENOLOL
- 62991282102 - ATENOLOL
- 62991282103 - ATENOLOL
- 62991295701 - LABETALOL HCL
- 62991295702 - LABETALOL HCL
- 62991295703 - LABETALOL HCL
- 63304062101 - ATENOLOL
- 63304062110 - ATENOLOL
- 63304062201 - ATENOLOL
- 63304062210 - ATENOLOL
- 63629174001 - ATENOLOL
- 63629174002 - ATENOLOL
- 63629174003 - ATENOLOL
- 63629178501 - ATENOLOL
- 63629178502 - ATENOLOL
- 63629178503 - ATENOLOL
- 63629407001 - CARVEDILOL
- 63629407002 - CARVEDILOL
- 63739002701 - ATENOLOL
- 63739002702 - ATENOLOL
- 63739002703 - ATENOLOL
- 63739002710 - ATENOLOL
- 63739002715 - ATENOLOL
- 63739002801 - ATENOLOL
- 63739002802 - ATENOLOL
- 63739002803 - ATENOLOL
- 63739002810 - ATENOLOL
- 63739002815 - ATENOLOL
- 63739036610 - LABETALOL HCL
- 63874033201 - ATENOLOL
- 63874033207 - ATENOLOL
- 63874033210 - ATENOLOL
- 63874033214 - ATENOLOL
- 63874033215 - ATENOLOL
- 63874033220 - ATENOLOL
- 63874033230 - ATENOLOL
- 63874033260 - ATENOLOL
- 63874033290 - ATENOLOL
- 63874046801 - ATENOLOL
- 63874046810 - ATENOLOL
- 63874046814 - ATENOLOL
- 63874046815 - ATENOLOL

- 63874046820 - ATENOLOL
- 63874046830 - ATENOLOL
- 63874046860 - ATENOLOL
- 63874046890 - ATENOLOL
- 65162066910 - ACEBUTOLOL HCL
- 65162067010 - ACEBUTOLOL HCL
- 65243001403 - ATENOLOL
- 65243001409 - ATENOLOL
- 65243001418 - ATENOLOL
- 65243001445 - ATENOLOL
- 65243034709 - ATENOLOL
- 65483035502 - LABETALOL HCL
- 65483035504 - LABETALOL HCL
- 65483039110 - LABETALOL HCL
- 65483039111 - LABETALOL HCL
- 65483039150 - LABETALOL HCL
- 65483039210 - LABETALOL HCL
- 65483039222 - LABETALOL HCL
- 65483039250 - LABETALOL HCL
- 65483039310 - LABETALOL HCL
- 65483039333 - LABETALOL HCL
- 65483039350 - LABETALOL HCL
- 65862008601 - BISOPROLOL FUMARATE
- 65862008630 - BISOPROLOL FUMARATE
- 65862008701 - BISOPROLOL FUMARATE
- 65862008730 - BISOPROLOL FUMARATE
- 65862014501 - CARVEDILOL
- 65862014505 - CARVEDILOL
- 65862016801 - ATENOLOL
- 65862016899 - ATENOLOL
- 65862016901 - ATENOLOL
- 65862016999 - ATENOLOL
- 66116023930 - ATENOLOL
- 66267003130 - ATENOLOL
- 66267003160 - ATENOLOL
- 66336058700 - ATENOLOL
- 66336058730 - ATENOLOL
- 66336058760 - ATENOLOL
- 66336058790 - ATENOLOL
- 66336071930 - ATENOLOL
- 66336071960 - ATENOLOL
- 66336071990 - ATENOLOL
- 66336083730 - CARVEDILOL
- 67253042009 - ATENOLOL
- 67253042010 - ATENOLOL
- 67253042011 - ATENOLOL

- 67253042109 - ATENOLOL
- 67253042110 - ATENOLOL
- 67253042111 - ATENOLOL
- 67263039901 - LABETALOL HCL
- 67286417701 - ACEBUTOLOL HCL
- 67286417901 - ACEBUTOLOL HCL
- 67544008730 - ATENOLOL
- 67544008745 - ATENOLOL
- 67544008753 - ATENOLOL
- 67544008760 - ATENOLOL
- 67544008770 - ATENOLOL
- 67544008773 - ATENOLOL
- 67544008780 - ATENOLOL
- 67544008792 - ATENOLOL
- 67544016130 - ATENOLOL
- 67544016145 - ATENOLOL
- 67544016160 - ATENOLOL
- 67544016180 - ATENOLOL
- 67544016192 - ATENOLOL
- 67544020830 - CARVEDILOL
- 67544020853 - CARVEDILOL
- 67544020860 - CARVEDILOL
- 67544020880 - CARVEDILOL
- 67544024030 - ATENOLOL
- 67544024045 - ATENOLOL
- 67544024060 - ATENOLOL
- 67544024080 - ATENOLOL
- 67544032615 - ATENOLOL
- 67544032630 - ATENOLOL
- 67544032645 - ATENOLOL
- 67544032660 - ATENOLOL
- 67544032673 - ATENOLOL
- 67544032680 - ATENOLOL
- 67544037530 - ATENOLOL
- 67544037545 - ATENOLOL
- 67544037560 - ATENOLOL
- 67544037565 - ATENOLOL
- 67544037580 - ATENOLOL
- 67544037630 - ATENOLOL
- 67544037645 - ATENOLOL
- 67544037660 - ATENOLOL
- 67544037670 - ATENOLOL
- 67544037673 - ATENOLOL
- 67544037680 - ATENOLOL
- 67544056560 - ATENOLOL
- 67544112353 - CARVEDILOL

- 67544113530 - CARVEDILOL
- 67544113553 - CARVEDILOL
- 67544113560 - CARVEDILOL
- 67544115930 - CARVEDILOL
- 67544115953 - CARVEDILOL
- 67544115960 - CARVEDILOL
- 67544115980 - CARVEDILOL
- 67857070001 - ACEBUTOLOL HCL
- 67857070101 - ACEBUTOLOL HCL
- 68001015200 - CARVEDILOL
- 68001015203 - CARVEDILOL
- 68084026401 - CARVEDILOL
- 68084026411 - CARVEDILOL
- 68084045601 - LABETALOL HCL
- 68084045611 - LABETALOL HCL
- 68084045701 - LABETALOL HCL
- 68084045711 - LABETALOL HCL
- 68084048711 - BISOPROLOL FUMARATE
- 68084048721 - BISOPROLOL FUMARATE
- 68115003930 - ATENOLOL
- 68115003960 - ATENOLOL
- 68115003990 - ATENOLOL
- 68115004030 - ATENOLOL
- 68115004060 - ATENOLOL
- 68115004090 - ATENOLOL
- 68115072700 - CARVEDILOL
- 68115072730 - CARVEDILOL
- 68258100501 - ATENOLOL
- 68258107801 - ATENOLOL
- 68258900501 - CARVEDILOL
- 68382002201 - ATENOLOL
- 68382002210 - ATENOLOL
- 68382002301 - ATENOLOL
- 68382002310 - ATENOLOL
- 68382009501 - CARVEDILOL
- 68382009505 - CARVEDILOL
- 68382009517 - CARVEDILOL
- 68387053830 - ATENOLOL
- 68462016501 - CARVEDILOL
- 68462016505 - CARVEDILOL
- 68645031054 - ATENOLOL
- 68645035259 - CARVEDILOL
- 68645046859 - CARVEDILOL
- 00006336603 - TIMOLOL MALEATE
- 00006336610 - TIMOLOL MALEATE
- 00006336612 - TIMOLOL MALEATE



- 00006336632 - TIMOLOL MALEATE
- 00006336703 - TIMOLOL MALEATE
- 00006336710 - TIMOLOL MALEATE
- 00006336712 - TIMOLOL MALEATE
- 00006336732 - TIMOLOL MALEATE
- 00006355703 - TIMOLOL MALEATE
- 00006355732 - TIMOLOL MALEATE
- 00006355735 - TIMOLOL MALEATE
- 00006355791 - TIMOLOL MALEATE
- 00006355803 - TIMOLOL MALEATE
- 00006355832 - TIMOLOL MALEATE
- 00006355835 - TIMOLOL MALEATE
- 00006355891 - TIMOLOL MALEATE
- 00006889535 - TIMOLOL MALEATE
- 00006889536 - TIMOLOL MALEATE
- 00006889635 - TIMOLOL MALEATE
- 00006889636 - TIMOLOL MALEATE
- 00007337013 - CARVEDILOL PHOSPHATE
- 00007337059 - CARVEDILOL PHOSPHATE
- 00007337113 - CARVEDILOL PHOSPHATE
- 00007337159 - CARVEDILOL PHOSPHATE
- 00007337213 - CARVEDILOL PHOSPHATE
- 00007337259 - CARVEDILOL PHOSPHATE
- 00007337313 - CARVEDILOL PHOSPHATE
- 00007337359 - CARVEDILOL PHOSPHATE
- 00007413920 - CARVEDILOL
- 00007413955 - CARVEDILOL
- 00007414020 - CARVEDILOL
- 00007414055 - CARVEDILOL
- 00093005101 - CARVEDILOL
- 00093005105 - CARVEDILOL
- 00093013501 - CARVEDILOL
- 00093013505 - CARVEDILOL
- 00168019903 - TIMOLOL MALEATE
- 00168019910 - TIMOLOL MALEATE
- 00168019915 - TIMOLOL MALEATE
- 00168019925 - TIMOLOL MALEATE
- 00168020003 - TIMOLOL MALEATE
- 00168020010 - TIMOLOL MALEATE
- 00168020015 - TIMOLOL MALEATE
- 00168020025 - TIMOLOL MALEATE
- 00228217511 - CARVEDILOL
- 00228217611 - CARVEDILOL
- 00364307753 - TIMOLOL MALEATE
- 00364307754 - TIMOLOL MALEATE
- 00364307772 - TIMOLOL MALEATE

- 00364307853 - TIMOLOL MALEATE
- 00364307854 - TIMOLOL MALEATE
- 00364307872 - TIMOLOL MALEATE
- 00378363101 - CARVEDILOL
- 00378363102 - CARVEDILOL
- 00378363105 - CARVEDILOL
- 00378363107 - CARVEDILOL
- 00378363201 - CARVEDILOL
- 00378363202 - CARVEDILOL
- 00378363205 - CARVEDILOL
- 00378363207 - CARVEDILOL
- 00536152572 - TIMOLOL MALEATE
- 00536153070 - TIMOLOL MALEATE
- 00536153072 - TIMOLOL MALEATE
- 00603733837 - TIMOLOL MALEATE
- 00603733839 - TIMOLOL MALEATE
- 00603733841 - TIMOLOL MALEATE
- 00603733937 - TIMOLOL MALEATE
- 00603733939 - TIMOLOL MALEATE
- 00603733941 - TIMOLOL MALEATE
- 00677162721 - TIMOLOL MALEATE
- 00677162730 - TIMOLOL MALEATE
- 00781522101 - CARVEDILOL
- 00781522201 - CARVEDILOL
- 00904524805 - TIMOLOL MALEATE
- 00904524810 - TIMOLOL MALEATE
- 00904524835 - TIMOLOL MALEATE
- 00904587061 - CARVEDILOL
- 00904587161 - CARVEDILOL
- 00904609861 - CARVEDILOL
- 00904609961 - CARVEDILOL
- 00904630061 - CARVEDILOL
- 00904630161 - CARVEDILOL
- 00904630261 - CARVEDILOL
- 12280037600 - CARVEDILOL
- 12280037630 - CARVEDILOL
- 12280037700 - CARVEDILOL
- 12280037730 - CARVEDILOL
- 12280040330 - CARVEDILOL PHOSPHATE
- 12280040430 - CARVEDILOL PHOSPHATE
- 12280040530 - CARVEDILOL PHOSPHATE
- 12280040630 - CARVEDILOL PHOSPHATE
- 13107014201 - CARVEDILOL
- 13107014205 - CARVEDILOL
- 13107014301 - CARVEDILOL
- 13107014305 - CARVEDILOL

- 13107014401 - CARVEDILOL
- 13107014405 - CARVEDILOL
- 16571014010 - TIMOLOL MALEATE
- 16571014015 - TIMOLOL MALEATE
- 16571014050 - TIMOLOL MALEATE
- 16571014110 - TIMOLOL MALEATE
- 16571014115 - TIMOLOL MALEATE
- 16571014150 - TIMOLOL MALEATE
- 17478028810 - TIMOLOL MALEATE
- 17478028811 - TIMOLOL MALEATE
- 17478028812 - TIMOLOL MALEATE
- 17478028910 - TIMOLOL MALEATE
- 17478028911 - TIMOLOL MALEATE
- 17478028912 - TIMOLOL MALEATE
- 21695064500 - CARVEDILOL
- 21695064560 - CARVEDILOL
- 21695064578 - CARVEDILOL
- 21695064630 - CARVEDILOL
- 21695064660 - CARVEDILOL
- 21695064678 - CARVEDILOL
- 21695064690 - CARVEDILOL
- 21695064730 - CARVEDILOL
- 21695064760 - CARVEDILOL
- 21695064778 - CARVEDILOL
- 21695064790 - CARVEDILOL
- 23490936903 - CARVEDILOL
- 23490936906 - CARVEDILOL
- 23490937003 - CARVEDILOL
- 23490937006 - CARVEDILOL
- 23490937103 - CARVEDILOL
- 23490937106 - CARVEDILOL
- 23629011110 - CARVEDILOL
- 23629011310 - CARVEDILOL
- 23629011410 - CARVEDILOL
- 24208000401 - TIMOLOL MALEATE
- 24208000403 - TIMOLOL MALEATE
- 24208032405 - TIMOLOL MALEATE
- 24208032410 - TIMOLOL MALEATE
- 24208032415 - TIMOLOL MALEATE
- 24208033005 - TIMOLOL MALEATE
- 24208033010 - TIMOLOL MALEATE
- 24208033015 - TIMOLOL MALEATE
- 25010081056 - TIMOLOL MALEATE
- 25010081156 - TIMOLOL MALEATE
- 25010081256 - TIMOLOL MALEATE
- 25010081316 - TIMOLOL MALEATE

- 25010081356 - TIMOLOL MALEATE
- 25010081656 - TIMOLOL MALEATE
- 25010081756 - TIMOLOL MALEATE
- 35356049030 - CARVEDILOL PHOSPHATE
- 35356051230 - CARVEDILOL
- 35356051260 - CARVEDILOL
- 35356051330 - CARVEDILOL
- 35356051830 - CARVEDILOL PHOSPHATE
- 35356090830 - CARVEDILOL
- 35356090860 - CARVEDILOL
- 35356094630 - CARVEDILOL
- 35356094660 - CARVEDILOL
- 42254016200 - CARVEDILOL
- 42254032010 - TIMOLOL MALEATE
- 42291020330 - CARVEDILOL
- 42291020350 - CARVEDILOL
- 42291020360 - CARVEDILOL
- 42291020390 - CARVEDILOL
- 42291022150 - CARVEDILOL
- 42291022160 - CARVEDILOL
- 42291022190 - CARVEDILOL
- 42291022218 - CARVEDILOL
- 42291022250 - CARVEDILOL
- 42291022260 - CARVEDILOL
- 42291022290 - CARVEDILOL
- 42291022330 - CARVEDILOL
- 42291022350 - CARVEDILOL
- 42291022360 - CARVEDILOL
- 42291022390 - CARVEDILOL
- 43063012593 - CARVEDILOL
- 43063012693 - CARVEDILOL
- 43063012793 - CARVEDILOL
- 43353010430 - CARVEDILOL
- 43353010453 - CARVEDILOL
- 43353010460 - CARVEDILOL
- 43353011930 - CARVEDILOL
- 43353011953 - CARVEDILOL
- 43353011960 - CARVEDILOL
- 43353011980 - CARVEDILOL
- 43353012230 - CARVEDILOL
- 43353012253 - CARVEDILOL
- 43353012260 - CARVEDILOL
- 43353013253 - CARVEDILOL
- 43353015653 - CARVEDILOL
- 43353015660 - CARVEDILOL
- 43353015680 - CARVEDILOL

- 43353016030 - CARVEDILOL
- 43353016053 - CARVEDILOL
- 43353016060 - CARVEDILOL
- 43353016070 - CARVEDILOL
- 43353016080 - CARVEDILOL
- 43353047830 - CARVEDILOL
- 43353047853 - CARVEDILOL
- 43353047860 - CARVEDILOL
- 43353048553 - CARVEDILOL
- 43353048630 - CARVEDILOL
- 43353048653 - CARVEDILOL
- 43353048660 - CARVEDILOL
- 43353048680 - CARVEDILOL
- 43353083830 - CARVEDILOL
- 43353083853 - CARVEDILOL
- 43353083860 - CARVEDILOL
- 43353083880 - CARVEDILOL
- 43547025410 - CARVEDILOL
- 43547025450 - CARVEDILOL
- 43547025510 - CARVEDILOL
- 43547025550 - CARVEDILOL
- 43547025610 - CARVEDILOL
- 43547025650 - CARVEDILOL
- 49999057720 - CARVEDILOL
- 49999093830 - CARVEDILOL
- 49999093930 - CARVEDILOL
- 50111082120 - TIMOLOL MALEATE
- 50111082126 - TIMOLOL MALEATE
- 50111082127 - TIMOLOL MALEATE
- 50111082220 - TIMOLOL MALEATE
- 50111082226 - TIMOLOL MALEATE
- 50111082227 - TIMOLOL MALEATE
- 50383002105 - TIMOLOL MALEATE
- 50383002110 - TIMOLOL MALEATE
- 50383002115 - TIMOLOL MALEATE
- 51079077101 - CARVEDILOL
- 51079077117 - CARVEDILOL
- 51079077119 - CARVEDILOL
- 51079077120 - CARVEDILOL
- 51079093001 - CARVEDILOL
- 51079093017 - CARVEDILOL
- 51079093019 - CARVEDILOL
- 51079093020 - CARVEDILOL
- 51079093101 - CARVEDILOL
- 51079093117 - CARVEDILOL
- 51079093119 - CARVEDILOL

- 51079093120 - CARVEDILOL
- 51138038330 - CARVEDILOL
- 51138038430 - CARVEDILOL
- 51138038530 - CARVEDILOL
- 51138046630 - CARVEDILOL
- 51138046730 - CARVEDILOL
- 51138046830 - CARVEDILOL
- 51138051130 - CARVEDILOL PHOSPHATE
- 51138051230 - CARVEDILOL PHOSPHATE
- 51138051330 - CARVEDILOL PHOSPHATE
- 51138051430 - CARVEDILOL PHOSPHATE
- 52343002601 - CARVEDILOL
- 52343002605 - CARVEDILOL
- 52343002701 - CARVEDILOL
- 52343002705 - CARVEDILOL
- 52343002801 - CARVEDILOL
- 52343002805 - CARVEDILOL
- 52959113703 - TIMOLOL MALEATE
- 53002084271 - TIMOLOL MALEATE
- 53002084272 - TIMOLOL MALEATE
- 53002087072 - TIMOLOL MALEATE
- 54569088100 - TIMOLOL MALEATE
- 54569088200 - TIMOLOL MALEATE
- 54569120400 - TIMOLOL MALEATE
- 54569120500 - TIMOLOL MALEATE
- 54569120600 - TIMOLOL MALEATE
- 54569120700 - TIMOLOL MALEATE
- 54569428800 - TIMOLOL MALEATE
- 54569428900 - TIMOLOL MALEATE
- 54569430200 - TIMOLOL MALEATE
- 54569430300 - TIMOLOL MALEATE
- 54569430600 - TIMOLOL
- 54569437400 - TIMOLOL MALEATE
- 54569437500 - TIMOLOL MALEATE
- 54569439400 - TIMOLOL
- 54569537200 - TIMOLOL MALEATE
- 54569538400 - CARVEDILOL
- 54569538500 - CARVEDILOL
- 54569597400 - CARVEDILOL
- 54569597402 - CARVEDILOL
- 54569597500 - CARVEDILOL
- 54569597502 - CARVEDILOL
- 54569597503 - CARVEDILOL
- 54569597600 - CARVEDILOL
- 54569597602 - CARVEDILOL
- 54569597604 - CARVEDILOL

- 54868010601 - CARVEDILOL PHOSPHATE
- 54868062100 - TIMOLOL MALEATE
- 54868062101 - TIMOLOL MALEATE
- 54868062102 - TIMOLOL MALEATE
- 54868066401 - TIMOLOL MALEATE
- 54868066402 - TIMOLOL MALEATE
- 54868066403 - TIMOLOL MALEATE
- 54868198000 - CARVEDILOL
- 54868198001 - CARVEDILOL
- 54868306200 - CARVEDILOL
- 54868306201 - CARVEDILOL
- 54868306202 - CARVEDILOL
- 54868326300 - TIMOLOL MALEATE
- 54868326400 - TIMOLOL MALEATE
- 54868371300 - TIMOLOL MALEATE
- 54868371301 - TIMOLOL MALEATE
- 54868371400 - TIMOLOL MALEATE
- 54868371401 - TIMOLOL MALEATE
- 54868371402 - TIMOLOL MALEATE
- 54868439600 - CARVEDILOL
- 54868439601 - CARVEDILOL
- 54868439602 - CARVEDILOL
- 54868439603 - CARVEDILOL
- 54868442100 - CARVEDILOL
- 54868442101 - CARVEDILOL
- 54868442102 - CARVEDILOL
- 54868442400 - CARVEDILOL
- 54868442401 - CARVEDILOL
- 54868442402 - CARVEDILOL
- 54868442403 - CARVEDILOL
- 54868469100 - TIMOLOL MALEATE
- 54868577100 - CARVEDILOL PHOSPHATE
- 54868577101 - CARVEDILOL PHOSPHATE
- 54868577300 - CARVEDILOL
- 54868577301 - CARVEDILOL
- 54868577302 - CARVEDILOL
- 54868577303 - CARVEDILOL
- 54868586900 - CARVEDILOL PHOSPHATE
- 54868586901 - CARVEDILOL PHOSPHATE
- 54868601900 - CARVEDILOL PHOSPHATE
- 54868601901 - CARVEDILOL PHOSPHATE
- 55045136005 - TIMOLOL MALEATE
- 55081054400 - TIMOLOL MALEATE
- 55081054500 - TIMOLOL MALEATE
- 55081111300 - TIMOLOL MALEATE
- 55081111400 - TIMOLOL MALEATE

- 55111025201 - CARVEDILOL
- 55111025205 - CARVEDILOL
- 55111025301 - CARVEDILOL
- 55111025305 - CARVEDILOL
- 55111025401 - CARVEDILOL
- 55111025405 - CARVEDILOL
- 55289098630 - CARVEDILOL
- 55947072205 - TIMOLOL MALEATE
- 55947072210 - TIMOLOL MALEATE
- 55947072305 - TIMOLOL MALEATE
- 55947072310 - TIMOLOL MALEATE
- 57664024213 - CARVEDILOL
- 57664024218 - CARVEDILOL
- 57664024288 - CARVEDILOL
- 57664024413 - CARVEDILOL
- 57664024418 - CARVEDILOL
- 57664024488 - CARVEDILOL
- 57664024513 - CARVEDILOL
- 57664024518 - CARVEDILOL
- 57664024588 - CARVEDILOL
- 57866260702 - CARVEDILOL
- 57866260802 - CARVEDILOL
- 58016112601 - TIMOLOL MALEATE
- 58016606901 - TIMOLOL MALEATE
- 58016621601 - TIMOLOL MALEATE
- 58016633101 - TIMOLOL MALEATE
- 58768089805 - TIMOLOL
- 58768089810 - TIMOLOL
- 58768089815 - TIMOLOL
- 58768089905 - TIMOLOL
- 58768089910 - TIMOLOL
- 58768089915 - TIMOLOL
- 58864073730 - CARVEDILOL
- 59591076703 - TIMOLOL MALEATE
- 59591076710 - TIMOLOL MALEATE
- 59591076712 - TIMOLOL MALEATE
- 59591076803 - TIMOLOL MALEATE
- 59591076810 - TIMOLOL MALEATE
- 59591076812 - TIMOLOL MALEATE
- 59591376703 - TIMOLOL MALEATE
- 59591376801 - TIMOLOL MALEATE
- 59591376802 - TIMOLOL MALEATE
- 59591376803 - TIMOLOL MALEATE
- 60505055102 - TIMOLOL MALEATE
- 60505055103 - TIMOLOL MALEATE
- 60505055104 - TIMOLOL MALEATE



- 60505055202 - TIMOLOL MALEATE
- 60505055203 - TIMOLOL MALEATE
- 60505055204 - TIMOLOL MALEATE
- 60505059701 - TIMOLOL MALEATE
- 60505059702 - TIMOLOL MALEATE
- 60505059703 - TIMOLOL MALEATE
- 60505059801 - TIMOLOL MALEATE
- 60505059802 - TIMOLOL MALEATE
- 60505059803 - TIMOLOL MALEATE
- 60505260601 - CARVEDILOL
- 60505260608 - CARVEDILOL
- 60505260701 - CARVEDILOL
- 60505260708 - CARVEDILOL
- 60505260801 - CARVEDILOL
- 60505260808 - CARVEDILOL
- 60758080105 - TIMOLOL MALEATE
- 60758080110 - TIMOLOL MALEATE
- 60758080115 - TIMOLOL MALEATE
- 60758080205 - TIMOLOL MALEATE
- 60758080210 - TIMOLOL MALEATE
- 60758080215 - TIMOLOL MALEATE
- 60760014260 - CARVEDILOL
- 60760014360 - CARVEDILOL
- 60760014460 - CARVEDILOL
- 60814072005 - TIMOLOL MALEATE
- 60814072010 - TIMOLOL MALEATE
- 60814072015 - TIMOLOL MALEATE
- 60814072105 - TIMOLOL MALEATE
- 60814072110 - TIMOLOL MALEATE
- 60814072115 - TIMOLOL MALEATE
- 61314022405 - TIMOLOL MALEATE
- 61314022505 - TIMOLOL MALEATE
- 61314022525 - TIMOLOL MALEATE
- 61314022605 - TIMOLOL MALEATE
- 61314022610 - TIMOLOL MALEATE
- 61314022615 - TIMOLOL MALEATE
- 61314022705 - TIMOLOL MALEATE
- 61314022710 - TIMOLOL MALEATE
- 61314022715 - TIMOLOL MALEATE
- 63629366801 - CARVEDILOL
- 63629366802 - CARVEDILOL
- 63629366803 - CARVEDILOL
- 63629366901 - CARVEDILOL
- 63629366902 - CARVEDILOL
- 63629366903 - CARVEDILOL
- 63629406001 - CARVEDILOL

- 63629406002 - CARVEDILOL
- 65086052205 - TIMOLOL
- 65086052210 - TIMOLOL
- 65086052215 - TIMOLOL
- 65086052505 - TIMOLOL
- 65086052510 - TIMOLOL
- 65086052515 - TIMOLOL
- 65862014201 - CARVEDILOL
- 65862014205 - CARVEDILOL
- 65862014301 - CARVEDILOL
- 65862014305 - CARVEDILOL
- 65862014401 - CARVEDILOL
- 65862014405 - CARVEDILOL
- 66336012560 - CARVEDILOL
- 66336012660 - CARVEDILOL
- 66336077230 - CARVEDILOL
- 66336080830 - CARVEDILOL
- 66336080860 - CARVEDILOL
- 67425000312 - TIMOLOL MALEATE
- 67425000350 - TIMOLOL MALEATE
- 67544004330 - CARVEDILOL
- 67544004353 - CARVEDILOL
- 67544004360 - CARVEDILOL
- 67544004380 - CARVEDILOL
- 67544014330 - CARVEDILOL
- 67544014353 - CARVEDILOL
- 67544014360 - CARVEDILOL
- 67544014370 - CARVEDILOL
- 67544014380 - CARVEDILOL
- 67544030530 - CARVEDILOL
- 67544030553 - CARVEDILOL
- 67544030560 - CARVEDILOL
- 67544114353 - CARVEDILOL
- 67544114360 - CARVEDILOL
- 67544114380 - CARVEDILOL
- 67544114553 - CARVEDILOL
- 67544114560 - CARVEDILOL
- 67544114630 - CARVEDILOL
- 67544114660 - CARVEDILOL
- 67544118253 - CARVEDILOL
- 67544118280 - CARVEDILOL
- 67544118730 - CARVEDILOL
- 67544118753 - CARVEDILOL
- 67544118760 - CARVEDILOL
- 68001015100 - CARVEDILOL
- 68001015103 - CARVEDILOL

- 68001015300 - CARVEDILOL
- 68001015303 - CARVEDILOL
- 68001015400 - CARVEDILOL
- 68001015403 - CARVEDILOL
- 68084026101 - CARVEDILOL
- 68084026111 - CARVEDILOL
- 68084026201 - CARVEDILOL
- 68084026211 - CARVEDILOL
- 68084026301 - CARVEDILOL
- 68084026311 - CARVEDILOL
- 68115055100 - CARVEDILOL
- 68258900401 - CARVEDILOL
- 68258900601 - CARVEDILOL
- 68258900701 - CARVEDILOL
- 68382009201 - CARVEDILOL
- 68382009205 - CARVEDILOL
- 68382009217 - CARVEDILOL
- 68382009301 - CARVEDILOL
- 68382009305 - CARVEDILOL
- 68382009317 - CARVEDILOL
- 68382009401 - CARVEDILOL
- 68382009405 - CARVEDILOL
- 68382009417 - CARVEDILOL
- 68462016201 - CARVEDILOL
- 68462016205 - CARVEDILOL
- 68462016301 - CARVEDILOL
- 68462016305 - CARVEDILOL
- 68462016401 - CARVEDILOL
- 68462016405 - CARVEDILOL
- 68645035059 - CARVEDILOL
- 68645035159 - CARVEDILOL
- 68669052205 - TIMOLOL
- 68669052210 - TIMOLOL
- 68669052215 - TIMOLOL
- 68669052505 - TIMOLOL
- 68669052510 - TIMOLOL
- 68669052515 - TIMOLOL
- 76478000205 - TIMOLOL
- 76478000210 - TIMOLOL
- 76478000215 - TIMOLOL

*Use of lisinopril*

This event measure was defined as occurring when any of the following criteria were met:

- The occurrence of **Prescription Claims** with the following attributes:

- **NDC Drug Code** is any of: { 00006001528, 00006001531, 00006001558, 00006001572, 00006001928, 00006001954, 00006001958, 00006001972, 00006001982, 00006001986, 00006001987, 00006001994, 00006010628, 00006010631, 00006010654, 00006010658, 00006010672, 00006010682, 00006010686, 00006010687, 00006010694, 00006020728, 00006020731, 00006020754, 00006020758, 00006020772, 00006020782, 00006020786, 00006020787, 00006020794, 00006023758, 00038013010, 00038013034, 00038013039, 00038013110, 00038013134, 00038013139, 00038013210, 00038013234, 00038013239, 00038013410, 00038013439, 00093111101, 00093111201, 00093111210, 00093111301, 00093111310, 00093111401, 00093111410, 00093111501, 00093111505, 00093515701, 00143126501, 00143126509, 00143126510, 00143126601, 00143126609, 00143126610, 00143126630, 00143126645, 00143126701, 00143126709, 00143126710, 00143126718, 00143126730, 00143126745, 00143126801, 00143126809, 00143126810, 00143126818, 00143126830, 00143126845, 00143127001, 00143127009, 00143127010, 00143127018, 00143127030, 00143127045, 00143128001, 00143128010, 00172375700, 00172375710, 00172375760, 00172375770, 00172375800, 00172375810, 00172375860, 00172375870, 00172375880, 00172375900, 00172375910, 00172375960, 00172375970, 00172375980, 00172375985, 00172376000, 00172376010, 00172376060, 00172376070, 00172376080, 00172376085, 00172376100, 00172376110, 00172376160, 00172376170, 00172376180, 00172376200, 00172376210, 00172376260, 00172376270, 00179198430, 00179198530, 00185002501, 00185002510, 00185010101, 00185010110, 00185010133, 00185010201, 00185010210, 00185010233, 00185010301, 00185010310, 00185010401, 00185010410, 00185540001, 00185540010, 00185540033, 00247102300, 00247102330, 00247102360, 00247114710, 00247114730, 00247114760, 00247139630, 00310013010, 00310013011, 00310013034, 00310013039, 00310013110, 00310013111, 00310013134, 00310013139, 00310013173, 00310013210, 00310013211, 00310013234, 00310013239, 00310013273, 00310013310, 00310013311, 00310013410, 00310013411, 00310013510, 00310013511, 00378207201, 00378207301, 00378207310, 00378207401, 00378207410, 00378207501, 00378207510, 00378207601, 00378207605, 00378207701, 00440767490, 00440767530, 00440767590, 00440767599, 00440767614, 00440767630, 00440767645, 00440767690, 00440767790, 00591040501, 00591040505, 00591040601, 00591040610, 00591040701, 00591040710, 00591040801, 00591040810, 00591040901, 00591040905, 00591040975, 00591088501, 00603420921, 00603420928, 00603421002, 00603421016, 00603421021, 00603421028, 00603421030, 00603421032, 00603421060, 00603421102, 00603421121, 00603421128, 00603421132, 00603421134, 00603421160, 00603421202, 00603421221, 00603421228, 00603421232, 00603421234, 00603421260, 00603421321, 00603421328, 00603421402, 00603421404, 00603421421, 00603421428, 00603421430, 00603421432, 00603421460, 00781166501, 00781166592, 00781166601, 00781166692, 00781166701, 00781166792, 00781166801, 00781166892, 00781166901, 00781167301, 00904563761, 00904563843, 00904563846, 00904563861, 00904563889, 00904563943, 00904563946, 00904563948, 00904563961, 00904563989, 00904563993, 00904564043, 00904564046, 00904564048, 00904564061, 00904564089, 00904564093, 00904564161, 00904564243, 00904564246, 00904564248, 00904564252, 00904564261,

00904564289, 00904564293, 00904577889, 00904580843, 00904580846,  
00904580848, 00904580861, 00904580880, 00904580889, 00904580893,  
00904580943, 00904580946, 00904580948, 00904580961, 00904580980,  
00904580989, 00904580993, 00904581043, 00904581046, 00904581048,  
00904581052, 00904581061, 00904581080, 00904581089, 00904581093,  
00904581143, 00904581146, 00904581161, 00904581180, 00904581189,  
00904581240, 00904581289, 16590030630, 16590030690, 16590035660,  
21695032830, 21695032890, 21695032915, 21695032930, 21695032978,  
21695032990, 21695033020, 21695033030, 21695033060, 21695033090,  
21695033130, 21695033140, 21695033160, 21695033190, 21695034530,  
21695034590, 23490581500, 23490581501, 23490581601, 23490581602,  
23490581606, 23490581702, 23490581802, 23490581902, 23629014710,  
23629014810, 24658024010, 24658024090, 24658024110, 24658024130,  
24658024145, 24658024190, 24658024210, 24658024215, 24658024218,  
24658024230, 24658024245, 24658024290, 24658024310, 24658024315,  
24658024318, 24658024330, 24658024345, 24658024390, 24658024401,  
24658024410, 24658024510, 24658024515, 24658024518, 24658024530,  
24658024545, 24658024560, 24658024590, 31722041701, 31722041710,  
31722041801, 31722041810, 31722041901, 31722041910, 31722042001,  
31722042010, 31722042101, 31722042110, 31722042201, 31722042210,  
33358021130, 33358021230, 33358021330, 35356069530, 35356087930,  
35356087990, 35356094830, 35356094860, 35356094890, 35356097330,  
35356097360, 35356097390, 43063000701, 43063000714, 43063000730,  
43063000760, 43063000790, 43063000798, 43063003201, 43063013890,  
43063041401, 43063041490, 43353031360, 43353035030, 43353035045,  
43353035060, 43353035080, 43353036515, 43353036530, 43353036545,  
43353036560, 43353037115, 43353037130, 43353037145, 43353037160,  
43353037180, 43353041160, 43353048845, 43353051645, 43353064360,  
43353066280, 44514048018, 44514048118, 44514048218, 44514048318,  
47463440230, 47463440260, 47463440290, 47463442430, 49884055601,  
49884055610, 49884055701, 49884055710, 49884055801, 49884055810,  
49884055901, 49884055910, 49884056001, 49884056010, 49884063501,  
49884063510, 49999018210, 49999018230, 49999018260, 49999018290,  
49999018310, 49999018330, 49999018360, 49999018390, 49999029500,  
49999029510, 49999029530, 49999046910, 49999046930, 49999046960,  
49999046990, 49999087000, 49999087030, 49999087060, 49999087090,  
51079025640, 51079026140, 51079098101, 51079098120, 51079098130,  
51079098140, 51079098156, 51079098157, 51079098160, 51079098201,  
51079098217, 51079098219, 51079098220, 51079098230, 51079098240,  
51079098256, 51079098257, 51079098260, 51079098301, 51079098317,  
51079098319, 51079098320, 51079098330, 51079098340, 51079098356,  
51079098357, 51079098360, 51079098401, 51079098420, 51079098440,  
51079098450, 51138006330, 51138006430, 51138006530, 51138006630,  
51138006730, 51138006830, 51138013430, 51138013530, 51138013630,  
51138013730, 51138013830, 51138013930, 52959072815, 52959072820,  
52959072830, 52959072890, 52959072930, 52959072960, 52959072990,  
52959075300, 52959075330, 52959085420, 52959085430, 52959097330,  
53506071030, 53506071330, 54124056130, 54124066830, 54458090502,  
54458090602, 54458099410, 54458099510, 54458099610, 54458099710,  
54458099809, 54458099909, 54569175200, 54569175201, 54569175202,

54569175203, 54569175206, 54569194400, 54569194401, 54569194402,  
54569194403, 54569205100, 54569205101, 54569205102, 54569266500,  
54569266501, 54569266502, 54569282900, 54569330000, 54569330001,  
54569330002, 54569330003, 54569377100, 54569459600, 54569472100,  
54569537900, 54569543400, 54569543403, 54569543404, 54569543405,  
54569543500, 54569543503, 54569543504, 54569543505, 54569543700,  
54569543702, 54569543800, 54569543803, 54569547200, 54569547202,  
54569572800, 54569851500, 54569852700, 54569858300, 54569858400,  
54868100101, 54868129601, 54868129602, 54868150100, 54868150101,  
54868150200, 54868196000, 54868196101, 54868196102, 54868197001,  
54868197002, 54868197003, 54868464600, 54868464602, 54868464603,  
54868464604, 54868464605, 54868465600, 54868465601, 54868465602,  
54868465603, 54868465700, 54868465701, 54868465702, 54868465704,  
54868465705, 54868465706, 54868465708, 54868465800, 54868465801,  
54868465802, 54868465803, 54868465804, 54868467800, 54868467801,  
54868467802, 54868467803, 54868467804, 54868478000, 54868478001,  
54868478002, 55045292906, 55045292908, 55045293700, 55045293800,  
55045293808, 55045297500, 55045297506, 55045297508, 55045377208,  
55175396403, 55289010630, 55289050930, 55289057730, 55289063801,  
55289063812, 55289063814, 55289063830, 55289063860, 55289063890,  
55289063898, 55289069614, 55289069630, 55289069660, 55289069690,  
55289069698, 55289080430, 55289088430, 55289088490, 55289091730,  
55289091790, 55289092908, 55289092930, 55887056930, 55887056990,  
55887059101, 57866200001, 57866200002, 57866400001, 57866400002,  
57866500001, 57866500002, 57866600001, 57866670002, 57866670102,  
57866670501, 57866670601, 57866798501, 57866798901, 57866870001,  
58016006900, 58016006930, 58016006960, 58016006990, 58016036214,  
58016036221, 58016036228, 58016036300, 58016036314, 58016036321,  
58016036330, 58016036360, 58016056400, 58016056430, 58016056460,  
58016056490, 58016064600, 58016064630, 58016064660, 58016064690,  
58016076000, 58016076030, 58016076060, 58016076090, 58016091700,  
58016091730, 58016091760, 58016091790, 58016095600, 58016095630,  
58016095660, 58016095690, 58016096300, 58016096330, 58016096360,  
58016096390, 58016099800, 58016099830, 58016099860, 58016099890,  
58864000630, 58864060315, 58864060330, 58864060390, 58864061830,  
58864065430, 58864075030, 58864075330, 58864075390, 59762227001,  
59762227003, 59762227007, 59762227101, 59762227103, 59762227107,  
59762227201, 59762227203, 59762227207, 59762227301, 59762227303,  
59762227307, 59762227401, 59762227403, 59762227407, 59762227501,  
59762227503, 59762227507, 60346087130, 60346097208, 60346097230,  
60429072801, 60429072810, 60429072830, 60429072890, 60429072901,  
60429072910, 60429072930, 60429072945, 60429072990, 60429073001,  
60429073010, 60429073030, 60429073045, 60429073090, 60429073101,  
60429073110, 60429073130, 60429073145, 60429073190, 60429073210,  
60429073230, 60429073290, 60429073301, 60429073310, 60429073330,  
60429073345, 60429073390, 60505018400, 60505018401, 60505018500,  
60505018501, 60505018507, 60505018509, 60505018600, 60505018601,  
60505018607, 60505018609, 60505018700, 60505018701, 60505018707,  
60505018709, 60505018800, 60505018801, 60505018900, 60505018901,  
60505018908, 60505018909, 60505268301, 60505268401, 60505268408,

60505268409, 60505268501, 60505268508, 60505268509, 60505268601,  
60505268608, 60505268609, 60505268801, 60505268808, 60505268809,  
60760012830, 60760026630, 60760026730, 60760027030, 63304053101,  
63304053201, 63304053210, 63304053301, 63304053310, 63304053401,  
63304053410, 63304053501, 63304053510, 63304059901, 63629176101,  
63629268801, 63629268802, 63629268803, 63629290801, 63629290802,  
63629290803, 63629290804, 63629293501, 63629293502, 63629293503,  
63629293504, 63739034810, 63739034815, 63739034910, 63739034915,  
63739035010, 63739035015, 63874051401, 63874051410, 63874051414,  
63874051415, 63874051416, 63874051420, 63874051428, 63874051430,  
63874051460, 63874051490, 63874052201, 63874052208, 63874052210,  
63874052214, 63874052215, 63874052220, 63874052221, 63874052228,  
63874052230, 63874052260, 63874052290, 63874055801, 63874055810,  
63874055814, 63874055816, 63874055828, 63874055830, 63874055860,  
63874055890, 63874061810, 63874061815, 63874061830, 63874061840,  
63874111409, 64679092701, 64679092702, 64679092705, 64679092801,  
64679092805, 64679092806, 64679092901, 64679092905, 64679092906,  
64679094101, 64679094105, 64679094106, 64679094201, 64679094202,  
64679094205, 64679095301, 64679095302, 64679095305, 65243030303,  
65243030309, 65243030315, 65243030345, 65243031403, 65243031409,  
65243031418, 65243031445, 65243034109, 65243034118, 65243034145,  
65243035803, 65243035809, 65243035845, 65862003701, 65862003705,  
65862003799, 65862003801, 65862003805, 65862003899, 65862003901,  
65862003905, 65862003999, 65862004001, 65862004005, 65862004099,  
65862004101, 65862004105, 65862004199, 65862004201, 65862004205,  
65862004299, 66116027930, 66336074130, 66336074190, 66336086730,  
66336086790, 66336097230, 66336097290, 66685070101, 66685070102,  
66685070201, 66685070202, 66685070203, 66685070301, 66685070302,  
66685070303, 66685070401, 66685070402, 66685070403, 66685070501,  
66685070601, 66685070602, 66685070603, 66685070604, 67544006230,  
67544006260, 67544006282, 67544012815, 67544012830, 67544012845,  
67544012853, 67544012860, 67544013415, 67544013430, 67544013445,  
67544013460, 67544013480, 67544014815, 67544014830, 67544014845,  
67544014853, 67544014860, 67544014880, 67544015915, 67544015930,  
67544015945, 67544015960, 67544015980, 67544017330, 67544017345,  
67544017353, 67544017360, 67544017430, 67544017445, 67544017460,  
67544017480, 67544019230, 67544019245, 67544019253, 67544019260,  
67544021860, 67544021882, 67544021915, 67544021930, 67544021945,  
67544021960, 67544067860, 67544099730, 67544099960, 67544099980,  
67544134845, 67544134860, 67544135045, 67544135060, 67544137245,  
68030670002, 68030670102, 68084005801, 68084005811, 68084006001,  
68084006011, 68084006101, 68084006111, 68084006201, 68084006211,  
68084006401, 68084006411, 68084019601, 68084019611, 68084019701,  
68084019711, 68084019801, 68084019811, 68084019901, 68084019911,  
68115020730, 68115020760, 68115020830, 68115020860, 68115020890,  
68115020930, 68115036130, 68115036200, 68115039630, 68180051201,  
68180051202, 68180051209, 68180051301, 68180051303, 68180051309,  
68180051401, 68180051403, 68180051409, 68180051501, 68180051503,  
68180051509, 68180051701, 68180051703, 68180051709, 68258105801,  
68258105901, 68258108001, 68258603609, 68387054330, 68645027254,

68645046954, 51927347100, 66685070502, 68180051601, 68180051602,  
68180051609 }



- 00006001528 - LISINOPRIL
- 00006001531 - LISINOPRIL
- 00006001558 - LISINOPRIL
- 00006001572 - LISINOPRIL
- 00006001928 - LISINOPRIL
- 00006001954 - LISINOPRIL
- 00006001958 - LISINOPRIL
- 00006001972 - LISINOPRIL
- 00006001982 - LISINOPRIL
- 00006001986 - LISINOPRIL
- 00006001987 - LISINOPRIL
- 00006001994 - LISINOPRIL
- 00006010628 - LISINOPRIL
- 00006010631 - LISINOPRIL
- 00006010654 - LISINOPRIL
- 00006010658 - LISINOPRIL
- 00006010672 - LISINOPRIL
- 00006010682 - LISINOPRIL
- 00006010686 - LISINOPRIL
- 00006010687 - LISINOPRIL
- 00006010694 - LISINOPRIL
- 00006020728 - LISINOPRIL
- 00006020731 - LISINOPRIL
- 00006020754 - LISINOPRIL
- 00006020758 - LISINOPRIL
- 00006020772 - LISINOPRIL
- 00006020782 - LISINOPRIL
- 00006020786 - LISINOPRIL
- 00006020787 - LISINOPRIL
- 00006020794 - LISINOPRIL
- 00006023758 - LISINOPRIL
- 00038013010 - LISINOPRIL
- 00038013034 - LISINOPRIL
- 00038013039 - LISINOPRIL
- 00038013110 - LISINOPRIL
- 00038013134 - LISINOPRIL
- 00038013139 - LISINOPRIL
- 00038013210 - LISINOPRIL
- 00038013234 - LISINOPRIL
- 00038013239 - LISINOPRIL
- 00038013410 - LISINOPRIL
- 00038013439 - LISINOPRIL
- 00093111101 - LISINOPRIL
- 00093111201 - LISINOPRIL
- 00093111210 - LISINOPRIL
- 00093111301 - LISINOPRIL

- 00093111310 - LISINOPRIL
- 00093111401 - LISINOPRIL
- 00093111410 - LISINOPRIL
- 00093111501 - LISINOPRIL
- 00093111505 - LISINOPRIL
- 00093515701 - LISINOPRIL
- 00143126501 - LISINOPRIL
- 00143126509 - LISINOPRIL
- 00143126510 - LISINOPRIL
- 00143126601 - LISINOPRIL
- 00143126609 - LISINOPRIL
- 00143126610 - LISINOPRIL
- 00143126630 - LISINOPRIL
- 00143126645 - LISINOPRIL
- 00143126701 - LISINOPRIL
- 00143126709 - LISINOPRIL
- 00143126710 - LISINOPRIL
- 00143126718 - LISINOPRIL
- 00143126730 - LISINOPRIL
- 00143126745 - LISINOPRIL
- 00143126801 - LISINOPRIL
- 00143126809 - LISINOPRIL
- 00143126810 - LISINOPRIL
- 00143126818 - LISINOPRIL
- 00143126830 - LISINOPRIL
- 00143126845 - LISINOPRIL
- 00143127001 - LISINOPRIL
- 00143127009 - LISINOPRIL
- 00143127010 - LISINOPRIL
- 00143127018 - LISINOPRIL
- 00143127030 - LISINOPRIL
- 00143127045 - LISINOPRIL
- 00143128001 - LISINOPRIL
- 00143128010 - LISINOPRIL
- 00172375700 - LISINOPRIL
- 00172375710 - LISINOPRIL
- 00172375760 - LISINOPRIL
- 00172375770 - LISINOPRIL
- 00172375800 - LISINOPRIL
- 00172375810 - LISINOPRIL
- 00172375860 - LISINOPRIL
- 00172375870 - LISINOPRIL
- 00172375880 - LISINOPRIL
- 00172375900 - LISINOPRIL
- 00172375910 - LISINOPRIL
- 00172375960 - LISINOPRIL

- 00172375970 - LISINOPRIL
- 00172375980 - LISINOPRIL
- 00172375985 - LISINOPRIL
- 00172376000 - LISINOPRIL
- 00172376010 - LISINOPRIL
- 00172376060 - LISINOPRIL
- 00172376070 - LISINOPRIL
- 00172376080 - LISINOPRIL
- 00172376085 - LISINOPRIL
- 00172376100 - LISINOPRIL
- 00172376110 - LISINOPRIL
- 00172376160 - LISINOPRIL
- 00172376170 - LISINOPRIL
- 00172376180 - LISINOPRIL
- 00172376200 - LISINOPRIL
- 00172376210 - LISINOPRIL
- 00172376260 - LISINOPRIL
- 00172376270 - LISINOPRIL
- 00179198430 - LISINOPRIL
- 00179198530 - LISINOPRIL
- 00185002501 - LISINOPRIL
- 00185002510 - LISINOPRIL
- 00185010101 - LISINOPRIL
- 00185010110 - LISINOPRIL
- 00185010133 - LISINOPRIL
- 00185010201 - LISINOPRIL
- 00185010210 - LISINOPRIL
- 00185010233 - LISINOPRIL
- 00185010301 - LISINOPRIL
- 00185010310 - LISINOPRIL
- 00185010401 - LISINOPRIL
- 00185010410 - LISINOPRIL
- 00185540001 - LISINOPRIL
- 00185540010 - LISINOPRIL
- 00185540033 - LISINOPRIL
- 00247102300 - LISINOPRIL
- 00247102330 - LISINOPRIL
- 00247102360 - LISINOPRIL
- 00247114710 - LISINOPRIL
- 00247114730 - LISINOPRIL
- 00247114760 - LISINOPRIL
- 00247139630 - LISINOPRIL
- 00310013010 - LISINOPRIL
- 00310013011 - LISINOPRIL
- 00310013034 - LISINOPRIL
- 00310013039 - LISINOPRIL

- 00310013110 - LISINOPRIL
- 00310013111 - LISINOPRIL
- 00310013134 - LISINOPRIL
- 00310013139 - LISINOPRIL
- 00310013173 - LISINOPRIL
- 00310013210 - LISINOPRIL
- 00310013211 - LISINOPRIL
- 00310013234 - LISINOPRIL
- 00310013239 - LISINOPRIL
- 00310013273 - LISINOPRIL
- 00310013310 - LISINOPRIL
- 00310013311 - LISINOPRIL
- 00310013410 - LISINOPRIL
- 00310013411 - LISINOPRIL
- 00310013510 - LISINOPRIL
- 00310013511 - LISINOPRIL
- 00378207201 - LISINOPRIL
- 00378207301 - LISINOPRIL
- 00378207310 - LISINOPRIL
- 00378207401 - LISINOPRIL
- 00378207410 - LISINOPRIL
- 00378207501 - LISINOPRIL
- 00378207510 - LISINOPRIL
- 00378207601 - LISINOPRIL
- 00378207605 - LISINOPRIL
- 00378207701 - LISINOPRIL
- 00440767490 - LISINOPRIL
- 00440767530 - LISINOPRIL
- 00440767590 - LISINOPRIL
- 00440767599 - LISINOPRIL
- 00440767614 - LISINOPRIL
- 00440767630 - LISINOPRIL
- 00440767645 - LISINOPRIL
- 00440767690 - LISINOPRIL
- 00440767790 - LISINOPRIL
- 00591040501 - LISINOPRIL
- 00591040505 - LISINOPRIL
- 00591040601 - LISINOPRIL
- 00591040610 - LISINOPRIL
- 00591040701 - LISINOPRIL
- 00591040710 - LISINOPRIL
- 00591040801 - LISINOPRIL
- 00591040810 - LISINOPRIL
- 00591040901 - LISINOPRIL
- 00591040905 - LISINOPRIL
- 00591040975 - LISINOPRIL

- 00591088501 - LISINOPRIL
- 00603420921 - LISINOPRIL
- 00603420928 - LISINOPRIL
- 00603421002 - LISINOPRIL
- 00603421016 - LISINOPRIL
- 00603421021 - LISINOPRIL
- 00603421028 - LISINOPRIL
- 00603421030 - LISINOPRIL
- 00603421032 - LISINOPRIL
- 00603421060 - LISINOPRIL
- 00603421102 - LISINOPRIL
- 00603421121 - LISINOPRIL
- 00603421128 - LISINOPRIL
- 00603421132 - LISINOPRIL
- 00603421134 - LISINOPRIL
- 00603421160 - LISINOPRIL
- 00603421202 - LISINOPRIL
- 00603421221 - LISINOPRIL
- 00603421228 - LISINOPRIL
- 00603421232 - LISINOPRIL
- 00603421234 - LISINOPRIL
- 00603421260 - LISINOPRIL
- 00603421321 - LISINOPRIL
- 00603421328 - LISINOPRIL
- 00603421402 - LISINOPRIL
- 00603421404 - LISINOPRIL
- 00603421421 - LISINOPRIL
- 00603421428 - LISINOPRIL
- 00603421430 - LISINOPRIL
- 00603421432 - LISINOPRIL
- 00603421460 - LISINOPRIL
- 00781166501 - LISINOPRIL
- 00781166592 - LISINOPRIL
- 00781166601 - LISINOPRIL
- 00781166692 - LISINOPRIL
- 00781166701 - LISINOPRIL
- 00781166792 - LISINOPRIL
- 00781166801 - LISINOPRIL
- 00781166892 - LISINOPRIL
- 00781166901 - LISINOPRIL
- 00781167301 - LISINOPRIL
- 00904563761 - LISINOPRIL
- 00904563843 - LISINOPRIL
- 00904563846 - LISINOPRIL
- 00904563861 - LISINOPRIL
- 00904563889 - LISINOPRIL

- 00904563943 - LISINOPRIL
- 00904563946 - LISINOPRIL
- 00904563948 - LISINOPRIL
- 00904563961 - LISINOPRIL
- 00904563989 - LISINOPRIL
- 00904563993 - LISINOPRIL
- 00904564043 - LISINOPRIL
- 00904564046 - LISINOPRIL
- 00904564048 - LISINOPRIL
- 00904564061 - LISINOPRIL
- 00904564089 - LISINOPRIL
- 00904564093 - LISINOPRIL
- 00904564161 - LISINOPRIL
- 00904564243 - LISINOPRIL
- 00904564246 - LISINOPRIL
- 00904564248 - LISINOPRIL
- 00904564252 - LISINOPRIL
- 00904564261 - LISINOPRIL
- 00904564289 - LISINOPRIL
- 00904564293 - LISINOPRIL
- 00904577889 - LISINOPRIL
- 00904580843 - LISINOPRIL
- 00904580846 - LISINOPRIL
- 00904580848 - LISINOPRIL
- 00904580861 - LISINOPRIL
- 00904580880 - LISINOPRIL
- 00904580889 - LISINOPRIL
- 00904580893 - LISINOPRIL
- 00904580943 - LISINOPRIL
- 00904580946 - LISINOPRIL
- 00904580948 - LISINOPRIL
- 00904580961 - LISINOPRIL
- 00904580980 - LISINOPRIL
- 00904580989 - LISINOPRIL
- 00904580993 - LISINOPRIL
- 00904581043 - LISINOPRIL
- 00904581046 - LISINOPRIL
- 00904581048 - LISINOPRIL
- 00904581052 - LISINOPRIL
- 00904581061 - LISINOPRIL
- 00904581080 - LISINOPRIL
- 00904581089 - LISINOPRIL
- 00904581093 - LISINOPRIL
- 00904581143 - LISINOPRIL
- 00904581146 - LISINOPRIL
- 00904581161 - LISINOPRIL

- 00904581180 - LISINOPRIL
- 00904581189 - LISINOPRIL
- 00904581240 - LISINOPRIL
- 00904581289 - LISINOPRIL
- 16590030630 - LISINOPRIL
- 16590030690 - LISINOPRIL
- 16590035660 - LISINOPRIL
- 21695032830 - LISINOPRIL
- 21695032890 - LISINOPRIL
- 21695032915 - LISINOPRIL
- 21695032930 - LISINOPRIL
- 21695032978 - LISINOPRIL
- 21695032990 - LISINOPRIL
- 21695033020 - LISINOPRIL
- 21695033030 - LISINOPRIL
- 21695033060 - LISINOPRIL
- 21695033090 - LISINOPRIL
- 21695033130 - LISINOPRIL
- 21695033140 - LISINOPRIL
- 21695033160 - LISINOPRIL
- 21695033190 - LISINOPRIL
- 21695034530 - LISINOPRIL
- 21695034590 - LISINOPRIL
- 23490581500 - LISINOPRIL
- 23490581501 - LISINOPRIL
- 23490581601 - LISINOPRIL
- 23490581602 - LISINOPRIL
- 23490581606 - LISINOPRIL
- 23490581702 - LISINOPRIL
- 23490581802 - LISINOPRIL
- 23490581902 - LISINOPRIL
- 23629014710 - LISINOPRIL
- 23629014810 - LISINOPRIL
- 24658024010 - LISINOPRIL
- 24658024090 - LISINOPRIL
- 24658024110 - LISINOPRIL
- 24658024130 - LISINOPRIL
- 24658024145 - LISINOPRIL
- 24658024190 - LISINOPRIL
- 24658024210 - LISINOPRIL
- 24658024215 - LISINOPRIL
- 24658024218 - LISINOPRIL
- 24658024230 - LISINOPRIL
- 24658024245 - LISINOPRIL
- 24658024290 - LISINOPRIL
- 24658024310 - LISINOPRIL

- 24658024315 - LISINOPRIL
- 24658024318 - LISINOPRIL
- 24658024330 - LISINOPRIL
- 24658024345 - LISINOPRIL
- 24658024390 - LISINOPRIL
- 24658024401 - LISINOPRIL
- 24658024410 - LISINOPRIL
- 24658024510 - LISINOPRIL
- 24658024515 - LISINOPRIL
- 24658024518 - LISINOPRIL
- 24658024530 - LISINOPRIL
- 24658024545 - LISINOPRIL
- 24658024560 - LISINOPRIL
- 24658024590 - LISINOPRIL
- 31722041701 - LISINOPRIL
- 31722041710 - LISINOPRIL
- 31722041801 - LISINOPRIL
- 31722041810 - LISINOPRIL
- 31722041901 - LISINOPRIL
- 31722041910 - LISINOPRIL
- 31722042001 - LISINOPRIL
- 31722042010 - LISINOPRIL
- 31722042101 - LISINOPRIL
- 31722042110 - LISINOPRIL
- 31722042201 - LISINOPRIL
- 31722042210 - LISINOPRIL
- 33358021130 - LISINOPRIL
- 33358021230 - LISINOPRIL
- 33358021330 - LISINOPRIL
- 35356069530 - LISINOPRIL
- 35356087930 - LISINOPRIL
- 35356087990 - LISINOPRIL
- 35356094830 - LISINOPRIL
- 35356094860 - LISINOPRIL
- 35356094890 - LISINOPRIL
- 35356097330 - LISINOPRIL
- 35356097360 - LISINOPRIL
- 35356097390 - LISINOPRIL
- 43063000701 - LISINOPRIL
- 43063000714 - LISINOPRIL
- 43063000730 - LISINOPRIL
- 43063000760 - LISINOPRIL
- 43063000790 - LISINOPRIL
- 43063000798 - LISINOPRIL
- 43063003201 - LISINOPRIL
- 43063013890 - LISINOPRIL



- 43063041401 - LISINOPRIL
- 43063041490 - LISINOPRIL
- 43353031360 - LISINOPRIL
- 43353035030 - LISINOPRIL
- 43353035045 - LISINOPRIL
- 43353035060 - LISINOPRIL
- 43353035080 - LISINOPRIL
- 43353036515 - LISINOPRIL
- 43353036530 - LISINOPRIL
- 43353036545 - LISINOPRIL
- 43353036560 - LISINOPRIL
- 43353037115 - LISINOPRIL
- 43353037130 - LISINOPRIL
- 43353037145 - LISINOPRIL
- 43353037160 - LISINOPRIL
- 43353037180 - LISINOPRIL
- 43353041160 - LISINOPRIL
- 43353048845 - LISINOPRIL
- 43353051645 - LISINOPRIL
- 43353064360 - LISINOPRIL
- 43353066280 - LISINOPRIL
- 44514048018 - LISINOPRIL
- 44514048118 - LISINOPRIL
- 44514048218 - LISINOPRIL
- 44514048318 - LISINOPRIL
- 47463440230 - LISINOPRIL
- 47463440260 - LISINOPRIL
- 47463440290 - LISINOPRIL
- 47463442430 - LISINOPRIL
- 49884055601 - LISINOPRIL
- 49884055610 - LISINOPRIL
- 49884055701 - LISINOPRIL
- 49884055710 - LISINOPRIL
- 49884055801 - LISINOPRIL
- 49884055810 - LISINOPRIL
- 49884055901 - LISINOPRIL
- 49884055910 - LISINOPRIL
- 49884056001 - LISINOPRIL
- 49884056010 - LISINOPRIL
- 49884063501 - LISINOPRIL
- 49884063510 - LISINOPRIL
- 49999018210 - LISINOPRIL
- 49999018230 - LISINOPRIL
- 49999018260 - LISINOPRIL
- 49999018290 - LISINOPRIL
- 49999018310 - LISINOPRIL

- 49999018330 - LISINOPRIL
- 49999018360 - LISINOPRIL
- 49999018390 - LISINOPRIL
- 49999029500 - LISINOPRIL
- 49999029510 - LISINOPRIL
- 49999029530 - LISINOPRIL
- 49999046910 - LISINOPRIL
- 49999046930 - LISINOPRIL
- 49999046960 - LISINOPRIL
- 49999046990 - LISINOPRIL
- 49999087000 - LISINOPRIL
- 49999087030 - LISINOPRIL
- 49999087060 - LISINOPRIL
- 49999087090 - LISINOPRIL
- 51079025640 - LISINOPRIL
- 51079026140 - LISINOPRIL
- 51079098101 - LISINOPRIL
- 51079098120 - LISINOPRIL
- 51079098130 - LISINOPRIL
- 51079098140 - LISINOPRIL
- 51079098156 - LISINOPRIL
- 51079098157 - LISINOPRIL
- 51079098160 - LISINOPRIL
- 51079098201 - LISINOPRIL
- 51079098217 - LISINOPRIL
- 51079098219 - LISINOPRIL
- 51079098220 - LISINOPRIL
- 51079098230 - LISINOPRIL
- 51079098240 - LISINOPRIL
- 51079098256 - LISINOPRIL
- 51079098257 - LISINOPRIL
- 51079098260 - LISINOPRIL
- 51079098301 - LISINOPRIL
- 51079098317 - LISINOPRIL
- 51079098319 - LISINOPRIL
- 51079098320 - LISINOPRIL
- 51079098330 - LISINOPRIL
- 51079098340 - LISINOPRIL
- 51079098356 - LISINOPRIL
- 51079098357 - LISINOPRIL
- 51079098360 - LISINOPRIL
- 51079098401 - LISINOPRIL
- 51079098420 - LISINOPRIL
- 51079098440 - LISINOPRIL
- 51079098450 - LISINOPRIL
- 51138006330 - LISINOPRIL

- 51138006430 - LISINOPRIL
- 51138006530 - LISINOPRIL
- 51138006630 - LISINOPRIL
- 51138006730 - LISINOPRIL
- 51138006830 - LISINOPRIL
- 51138013430 - LISINOPRIL
- 51138013530 - LISINOPRIL
- 51138013630 - LISINOPRIL
- 51138013730 - LISINOPRIL
- 51138013830 - LISINOPRIL
- 51138013930 - LISINOPRIL
- 52959072815 - LISINOPRIL
- 52959072820 - LISINOPRIL
- 52959072830 - LISINOPRIL
- 52959072890 - LISINOPRIL
- 52959072930 - LISINOPRIL
- 52959072960 - LISINOPRIL
- 52959072990 - LISINOPRIL
- 52959075300 - LISINOPRIL
- 52959075330 - LISINOPRIL
- 52959085420 - LISINOPRIL
- 52959085430 - LISINOPRIL
- 52959097330 - LISINOPRIL
- 53506071030 - LISINOPRIL
- 53506071330 - LISINOPRIL
- 54124056130 - LISINOPRIL
- 54124066830 - LISINOPRIL
- 54458090502 - LISINOPRIL
- 54458090602 - LISINOPRIL
- 54458099410 - LISINOPRIL
- 54458099510 - LISINOPRIL
- 54458099610 - LISINOPRIL
- 54458099710 - LISINOPRIL
- 54458099809 - LISINOPRIL
- 54458099909 - LISINOPRIL
- 54569175200 - LISINOPRIL
- 54569175201 - LISINOPRIL
- 54569175202 - LISINOPRIL
- 54569175203 - LISINOPRIL
- 54569175206 - LISINOPRIL
- 54569194400 - LISINOPRIL
- 54569194401 - LISINOPRIL
- 54569194402 - LISINOPRIL
- 54569194403 - LISINOPRIL
- 54569205100 - LISINOPRIL
- 54569205101 - LISINOPRIL

- 54569205102 - LISINOPRIL
- 54569266500 - LISINOPRIL
- 54569266501 - LISINOPRIL
- 54569266502 - LISINOPRIL
- 54569282900 - LISINOPRIL
- 54569330000 - LISINOPRIL
- 54569330001 - LISINOPRIL
- 54569330002 - LISINOPRIL
- 54569330003 - LISINOPRIL
- 54569377100 - LISINOPRIL
- 54569459600 - LISINOPRIL
- 54569472100 - LISINOPRIL
- 54569537900 - LISINOPRIL
- 54569543400 - LISINOPRIL
- 54569543403 - LISINOPRIL
- 54569543404 - LISINOPRIL
- 54569543405 - LISINOPRIL
- 54569543500 - LISINOPRIL
- 54569543503 - LISINOPRIL
- 54569543504 - LISINOPRIL
- 54569543505 - LISINOPRIL
- 54569543700 - LISINOPRIL
- 54569543702 - LISINOPRIL
- 54569543800 - LISINOPRIL
- 54569543803 - LISINOPRIL
- 54569547200 - LISINOPRIL
- 54569547202 - LISINOPRIL
- 54569572800 - LISINOPRIL
- 54569851500 - LISINOPRIL
- 54569852700 - LISINOPRIL
- 54569858300 - LISINOPRIL
- 54569858400 - LISINOPRIL
- 54868100101 - LISINOPRIL
- 54868129601 - LISINOPRIL
- 54868129602 - LISINOPRIL
- 54868150100 - LISINOPRIL
- 54868150101 - LISINOPRIL
- 54868150200 - LISINOPRIL
- 54868196000 - LISINOPRIL
- 54868196101 - LISINOPRIL
- 54868196102 - LISINOPRIL
- 54868197001 - LISINOPRIL
- 54868197002 - LISINOPRIL
- 54868197003 - LISINOPRIL
- 54868464600 - LISINOPRIL
- 54868464602 - LISINOPRIL

- 54868464603 - LISINOPRIL
- 54868464604 - LISINOPRIL
- 54868464605 - LISINOPRIL
- 54868465600 - LISINOPRIL
- 54868465601 - LISINOPRIL
- 54868465602 - LISINOPRIL
- 54868465603 - LISINOPRIL
- 54868465700 - LISINOPRIL
- 54868465701 - LISINOPRIL
- 54868465702 - LISINOPRIL
- 54868465704 - LISINOPRIL
- 54868465705 - LISINOPRIL
- 54868465706 - LISINOPRIL
- 54868465708 - LISINOPRIL
- 54868465800 - LISINOPRIL
- 54868465801 - LISINOPRIL
- 54868465802 - LISINOPRIL
- 54868465803 - LISINOPRIL
- 54868465804 - LISINOPRIL
- 54868467800 - LISINOPRIL
- 54868467801 - LISINOPRIL
- 54868467802 - LISINOPRIL
- 54868467803 - LISINOPRIL
- 54868467804 - LISINOPRIL
- 54868478000 - LISINOPRIL
- 54868478001 - LISINOPRIL
- 54868478002 - LISINOPRIL
- 55045292906 - LISINOPRIL
- 55045292908 - LISINOPRIL
- 55045293700 - LISINOPRIL
- 55045293800 - LISINOPRIL
- 55045293808 - LISINOPRIL
- 55045297500 - LISINOPRIL
- 55045297506 - LISINOPRIL
- 55045297508 - LISINOPRIL
- 55045377208 - LISINOPRIL
- 55175396403 - LISINOPRIL
- 55289010630 - LISINOPRIL
- 55289050930 - LISINOPRIL
- 55289057730 - LISINOPRIL
- 55289063801 - LISINOPRIL
- 55289063812 - LISINOPRIL
- 55289063814 - LISINOPRIL
- 55289063830 - LISINOPRIL
- 55289063860 - LISINOPRIL
- 55289063890 - LISINOPRIL

- 55289063898 - LISINOPRIL
- 55289069614 - LISINOPRIL
- 55289069630 - LISINOPRIL
- 55289069660 - LISINOPRIL
- 55289069690 - LISINOPRIL
- 55289069698 - LISINOPRIL
- 55289080430 - LISINOPRIL
- 55289088430 - LISINOPRIL
- 55289088490 - LISINOPRIL
- 55289091730 - LISINOPRIL
- 55289091790 - LISINOPRIL
- 55289092908 - LISINOPRIL
- 55289092930 - LISINOPRIL
- 55887056930 - LISINOPRIL
- 55887056990 - LISINOPRIL
- 55887059101 - LISINOPRIL
- 57866200001 - LISINOPRIL
- 57866200002 - LISINOPRIL
- 57866400001 - LISINOPRIL
- 57866400002 - LISINOPRIL
- 57866500001 - LISINOPRIL
- 57866500002 - LISINOPRIL
- 57866600001 - LISINOPRIL
- 57866670002 - LISINOPRIL
- 57866670102 - LISINOPRIL
- 57866670501 - LISINOPRIL
- 57866670601 - LISINOPRIL
- 57866798501 - LISINOPRIL
- 57866798901 - LISINOPRIL
- 57866870001 - LISINOPRIL
- 58016006900 - LISINOPRIL
- 58016006930 - LISINOPRIL
- 58016006960 - LISINOPRIL
- 58016006990 - LISINOPRIL
- 58016036214 - LISINOPRIL
- 58016036221 - LISINOPRIL
- 58016036228 - LISINOPRIL
- 58016036300 - LISINOPRIL
- 58016036314 - LISINOPRIL
- 58016036321 - LISINOPRIL
- 58016036330 - LISINOPRIL
- 58016036360 - LISINOPRIL
- 58016056400 - LISINOPRIL
- 58016056430 - LISINOPRIL
- 58016056460 - LISINOPRIL
- 58016056490 - LISINOPRIL

- 58016064600 - LISINOPRIL
- 58016064630 - LISINOPRIL
- 58016064660 - LISINOPRIL
- 58016064690 - LISINOPRIL
- 58016076000 - LISINOPRIL
- 58016076030 - LISINOPRIL
- 58016076060 - LISINOPRIL
- 58016076090 - LISINOPRIL
- 58016091700 - LISINOPRIL
- 58016091730 - LISINOPRIL
- 58016091760 - LISINOPRIL
- 58016091790 - LISINOPRIL
- 58016095600 - LISINOPRIL
- 58016095630 - LISINOPRIL
- 58016095660 - LISINOPRIL
- 58016095690 - LISINOPRIL
- 58016096300 - LISINOPRIL
- 58016096330 - LISINOPRIL
- 58016096360 - LISINOPRIL
- 58016096390 - LISINOPRIL
- 58016099800 - LISINOPRIL
- 58016099830 - LISINOPRIL
- 58016099860 - LISINOPRIL
- 58016099890 - LISINOPRIL
- 58864000630 - LISINOPRIL
- 58864060315 - LISINOPRIL
- 58864060330 - LISINOPRIL
- 58864060390 - LISINOPRIL
- 58864061830 - LISINOPRIL
- 58864065430 - LISINOPRIL
- 58864075030 - LISINOPRIL
- 58864075330 - LISINOPRIL
- 58864075390 - LISINOPRIL
- 59762227001 - LISINOPRIL
- 59762227003 - LISINOPRIL
- 59762227007 - LISINOPRIL
- 59762227101 - LISINOPRIL
- 59762227103 - LISINOPRIL
- 59762227107 - LISINOPRIL
- 59762227201 - LISINOPRIL
- 59762227203 - LISINOPRIL
- 59762227207 - LISINOPRIL
- 59762227301 - LISINOPRIL
- 59762227303 - LISINOPRIL
- 59762227307 - LISINOPRIL
- 59762227401 - LISINOPRIL

- 59762227403 - LISINOPRIL
- 59762227407 - LISINOPRIL
- 59762227501 - LISINOPRIL
- 59762227503 - LISINOPRIL
- 59762227507 - LISINOPRIL
- 60346087130 - LISINOPRIL
- 60346097208 - LISINOPRIL
- 60346097230 - LISINOPRIL
- 60429072801 - LISINOPRIL
- 60429072810 - LISINOPRIL
- 60429072830 - LISINOPRIL
- 60429072890 - LISINOPRIL
- 60429072901 - LISINOPRIL
- 60429072910 - LISINOPRIL
- 60429072930 - LISINOPRIL
- 60429072945 - LISINOPRIL
- 60429072990 - LISINOPRIL
- 60429073001 - LISINOPRIL
- 60429073010 - LISINOPRIL
- 60429073030 - LISINOPRIL
- 60429073045 - LISINOPRIL
- 60429073090 - LISINOPRIL
- 60429073101 - LISINOPRIL
- 60429073110 - LISINOPRIL
- 60429073130 - LISINOPRIL
- 60429073145 - LISINOPRIL
- 60429073190 - LISINOPRIL
- 60429073210 - LISINOPRIL
- 60429073230 - LISINOPRIL
- 60429073290 - LISINOPRIL
- 60429073301 - LISINOPRIL
- 60429073310 - LISINOPRIL
- 60429073330 - LISINOPRIL
- 60429073345 - LISINOPRIL
- 60429073390 - LISINOPRIL
- 60505018400 - LISINOPRIL
- 60505018401 - LISINOPRIL
- 60505018500 - LISINOPRIL
- 60505018501 - LISINOPRIL
- 60505018507 - LISINOPRIL
- 60505018509 - LISINOPRIL
- 60505018600 - LISINOPRIL
- 60505018601 - LISINOPRIL
- 60505018607 - LISINOPRIL
- 60505018609 - LISINOPRIL
- 60505018700 - LISINOPRIL



- 60505018701 - LISINOPRIL
- 60505018707 - LISINOPRIL
- 60505018709 - LISINOPRIL
- 60505018800 - LISINOPRIL
- 60505018801 - LISINOPRIL
- 60505018900 - LISINOPRIL
- 60505018901 - LISINOPRIL
- 60505018908 - LISINOPRIL
- 60505018909 - LISINOPRIL
- 60505268301 - LISINOPRIL
- 60505268401 - LISINOPRIL
- 60505268408 - LISINOPRIL
- 60505268409 - LISINOPRIL
- 60505268501 - LISINOPRIL
- 60505268508 - LISINOPRIL
- 60505268509 - LISINOPRIL
- 60505268601 - LISINOPRIL
- 60505268608 - LISINOPRIL
- 60505268609 - LISINOPRIL
- 60505268801 - LISINOPRIL
- 60505268808 - LISINOPRIL
- 60505268809 - LISINOPRIL
- 60760012830 - LISINOPRIL
- 60760026630 - LISINOPRIL
- 60760026730 - LISINOPRIL
- 60760027030 - LISINOPRIL
- 63304053101 - LISINOPRIL
- 63304053201 - LISINOPRIL
- 63304053210 - LISINOPRIL
- 63304053301 - LISINOPRIL
- 63304053310 - LISINOPRIL
- 63304053401 - LISINOPRIL
- 63304053410 - LISINOPRIL
- 63304053501 - LISINOPRIL
- 63304053510 - LISINOPRIL
- 63304059901 - LISINOPRIL
- 63629176101 - LISINOPRIL
- 63629268801 - LISINOPRIL
- 63629268802 - LISINOPRIL
- 63629268803 - LISINOPRIL
- 63629290801 - LISINOPRIL
- 63629290802 - LISINOPRIL
- 63629290803 - LISINOPRIL
- 63629290804 - LISINOPRIL
- 63629293501 - LISINOPRIL
- 63629293502 - LISINOPRIL

- 63629293503 - LISINOPRIL
- 63629293504 - LISINOPRIL
- 63739034810 - LISINOPRIL
- 63739034815 - LISINOPRIL
- 63739034910 - LISINOPRIL
- 63739034915 - LISINOPRIL
- 63739035010 - LISINOPRIL
- 63739035015 - LISINOPRIL
- 63874051401 - LISINOPRIL
- 63874051410 - LISINOPRIL
- 63874051414 - LISINOPRIL
- 63874051415 - LISINOPRIL
- 63874051416 - LISINOPRIL
- 63874051420 - LISINOPRIL
- 63874051428 - LISINOPRIL
- 63874051430 - LISINOPRIL
- 63874051460 - LISINOPRIL
- 63874051490 - LISINOPRIL
- 63874052201 - LISINOPRIL
- 63874052208 - LISINOPRIL
- 63874052210 - LISINOPRIL
- 63874052214 - LISINOPRIL
- 63874052215 - LISINOPRIL
- 63874052220 - LISINOPRIL
- 63874052221 - LISINOPRIL
- 63874052228 - LISINOPRIL
- 63874052230 - LISINOPRIL
- 63874052260 - LISINOPRIL
- 63874052290 - LISINOPRIL
- 63874055801 - LISINOPRIL
- 63874055810 - LISINOPRIL
- 63874055814 - LISINOPRIL
- 63874055816 - LISINOPRIL
- 63874055828 - LISINOPRIL
- 63874055830 - LISINOPRIL
- 63874055860 - LISINOPRIL
- 63874055890 - LISINOPRIL
- 63874061810 - LISINOPRIL
- 63874061815 - LISINOPRIL
- 63874061830 - LISINOPRIL
- 63874061840 - LISINOPRIL
- 63874111409 - LISINOPRIL
- 64679092701 - LISINOPRIL
- 64679092702 - LISINOPRIL
- 64679092705 - LISINOPRIL
- 64679092801 - LISINOPRIL

- 64679092805 - LISINOPRIL
- 64679092806 - LISINOPRIL
- 64679092901 - LISINOPRIL
- 64679092905 - LISINOPRIL
- 64679092906 - LISINOPRIL
- 64679094101 - LISINOPRIL
- 64679094105 - LISINOPRIL
- 64679094106 - LISINOPRIL
- 64679094201 - LISINOPRIL
- 64679094202 - LISINOPRIL
- 64679094205 - LISINOPRIL
- 64679095301 - LISINOPRIL
- 64679095302 - LISINOPRIL
- 64679095305 - LISINOPRIL
- 65243030303 - LISINOPRIL
- 65243030309 - LISINOPRIL
- 65243030315 - LISINOPRIL
- 65243030345 - LISINOPRIL
- 65243031403 - LISINOPRIL
- 65243031409 - LISINOPRIL
- 65243031418 - LISINOPRIL
- 65243031445 - LISINOPRIL
- 65243034109 - LISINOPRIL
- 65243034118 - LISINOPRIL
- 65243034145 - LISINOPRIL
- 65243035803 - LISINOPRIL
- 65243035809 - LISINOPRIL
- 65243035845 - LISINOPRIL
- 65862003701 - LISINOPRIL
- 65862003705 - LISINOPRIL
- 65862003799 - LISINOPRIL
- 65862003801 - LISINOPRIL
- 65862003805 - LISINOPRIL
- 65862003899 - LISINOPRIL
- 65862003901 - LISINOPRIL
- 65862003905 - LISINOPRIL
- 65862003999 - LISINOPRIL
- 65862004001 - LISINOPRIL
- 65862004005 - LISINOPRIL
- 65862004099 - LISINOPRIL
- 65862004101 - LISINOPRIL
- 65862004105 - LISINOPRIL
- 65862004199 - LISINOPRIL
- 65862004201 - LISINOPRIL
- 65862004205 - LISINOPRIL
- 65862004299 - LISINOPRIL

- 66116027930 - LISINOPRIL
- 66336074130 - LISINOPRIL
- 66336074190 - LISINOPRIL
- 66336086730 - LISINOPRIL
- 66336086790 - LISINOPRIL
- 66336097230 - LISINOPRIL
- 66336097290 - LISINOPRIL
- 66685070101 - LISINOPRIL
- 66685070102 - LISINOPRIL
- 66685070201 - LISINOPRIL
- 66685070202 - LISINOPRIL
- 66685070203 - LISINOPRIL
- 66685070301 - LISINOPRIL
- 66685070302 - LISINOPRIL
- 66685070303 - LISINOPRIL
- 66685070401 - LISINOPRIL
- 66685070402 - LISINOPRIL
- 66685070403 - LISINOPRIL
- 66685070501 - LISINOPRIL
- 66685070601 - LISINOPRIL
- 66685070602 - LISINOPRIL
- 66685070603 - LISINOPRIL
- 66685070604 - LISINOPRIL
- 67544006230 - LISINOPRIL
- 67544006260 - LISINOPRIL
- 67544006282 - LISINOPRIL
- 67544012815 - LISINOPRIL
- 67544012830 - LISINOPRIL
- 67544012845 - LISINOPRIL
- 67544012853 - LISINOPRIL
- 67544012860 - LISINOPRIL
- 67544013415 - LISINOPRIL
- 67544013430 - LISINOPRIL
- 67544013445 - LISINOPRIL
- 67544013460 - LISINOPRIL
- 67544013480 - LISINOPRIL
- 67544014815 - LISINOPRIL
- 67544014830 - LISINOPRIL
- 67544014845 - LISINOPRIL
- 67544014853 - LISINOPRIL
- 67544014860 - LISINOPRIL
- 67544014880 - LISINOPRIL
- 67544015915 - LISINOPRIL
- 67544015930 - LISINOPRIL
- 67544015945 - LISINOPRIL
- 67544015960 - LISINOPRIL

- 67544015980 - LISINOPRIL
- 67544017330 - LISINOPRIL
- 67544017345 - LISINOPRIL
- 67544017353 - LISINOPRIL
- 67544017360 - LISINOPRIL
- 67544017430 - LISINOPRIL
- 67544017445 - LISINOPRIL
- 67544017460 - LISINOPRIL
- 67544017480 - LISINOPRIL
- 67544019230 - LISINOPRIL
- 67544019245 - LISINOPRIL
- 67544019253 - LISINOPRIL
- 67544019260 - LISINOPRIL
- 67544021860 - LISINOPRIL
- 67544021882 - LISINOPRIL
- 67544021915 - LISINOPRIL
- 67544021930 - LISINOPRIL
- 67544021945 - LISINOPRIL
- 67544021960 - LISINOPRIL
- 67544067860 - LISINOPRIL
- 67544099730 - LISINOPRIL
- 67544099960 - LISINOPRIL
- 67544099980 - LISINOPRIL
- 67544134845 - LISINOPRIL
- 67544134860 - LISINOPRIL
- 67544135045 - LISINOPRIL
- 67544135060 - LISINOPRIL
- 67544137245 - LISINOPRIL
- 68030670002 - LISINOPRIL
- 68030670102 - LISINOPRIL
- 68084005801 - LISINOPRIL
- 68084005811 - LISINOPRIL
- 68084006001 - LISINOPRIL
- 68084006011 - LISINOPRIL
- 68084006101 - LISINOPRIL
- 68084006111 - LISINOPRIL
- 68084006201 - LISINOPRIL
- 68084006211 - LISINOPRIL
- 68084006401 - LISINOPRIL
- 68084006411 - LISINOPRIL
- 68084019601 - LISINOPRIL
- 68084019611 - LISINOPRIL
- 68084019701 - LISINOPRIL
- 68084019711 - LISINOPRIL
- 68084019801 - LISINOPRIL
- 68084019811 - LISINOPRIL

- 68084019901 - LISINOPRIL
- 68084019911 - LISINOPRIL
- 68115020730 - LISINOPRIL
- 68115020760 - LISINOPRIL
- 68115020830 - LISINOPRIL
- 68115020860 - LISINOPRIL
- 68115020890 - LISINOPRIL
- 68115020930 - LISINOPRIL
- 68115036130 - LISINOPRIL
- 68115036200 - LISINOPRIL
- 68115039630 - LISINOPRIL
- 68180051201 - LISINOPRIL
- 68180051202 - LISINOPRIL
- 68180051209 - LISINOPRIL
- 68180051301 - LISINOPRIL
- 68180051303 - LISINOPRIL
- 68180051309 - LISINOPRIL
- 68180051401 - LISINOPRIL
- 68180051403 - LISINOPRIL
- 68180051409 - LISINOPRIL
- 68180051501 - LISINOPRIL
- 68180051503 - LISINOPRIL
- 68180051509 - LISINOPRIL
- 68180051701 - LISINOPRIL
- 68180051703 - LISINOPRIL
- 68180051709 - LISINOPRIL
- 68258105801 - LISINOPRIL
- 68258105901 - LISINOPRIL
- 68258108001 - LISINOPRIL
- 68258603609 - LISINOPRIL
- 68387054330 - LISINOPRIL
- 68645027254 - LISINOPRIL
- 68645046954 - LISINOPRIL
- 51927347100 - LISINOPRIL
- 66685070502 - LISINOPRIL
- 68180051601 - LISINOPRIL
- 68180051602 - LISINOPRIL
- 68180051609 - LISINOPRIL

### *Death*

This is a built-in patient attribute.

### *Gender*

This is a built-in patient attribute.

## Use of beta blocker OR lisinopril (for new use exclusion)

This measure combines the following events or flags (using a logical OR):

- [Use of beta blocker](#)
- [Use of lisinopril](#)

## References

1. Schneeweiss S. A basic study design for expedited safety signal evaluation based on electronic healthcare data. *Pharmacoepidemiol Drug Saf.* 2010;19(8):858–868. Available at: <http://www.ncbi.nlm.nih.gov/pubmed/20681003>.
2. Vandembroucke JP, Elm E von, Altman DG, et al. Strengthening the reporting of observational studies in epidemiology (STROBE): explanation and elaboration. *Epidemiology.* 2007;18(6):805–835. Available at: <http://www.ncbi.nlm.nih.gov/pubmed/18049195>.
3. Stergachis AS. Record linkage studies for postmarketing drug surveillance: data quality and validity considerations. *Drug Intell Clin Pharm.* 1988;22(2):157–161. Available at: <http://www.ncbi.nlm.nih.gov/pubmed/3349931>.
4. Levy AR, O'Brien BJ, Sellors C, Grootendorst P, Willison D. Coding accuracy of administrative drug claims in the ontario drug benefit database. *Can J Clin Pharmacol.* 2003;10(2):67–71. Available at: <http://www.ncbi.nlm.nih.gov/pubmed/12879144>.
5. West SL, Savitz DA, Koch G, Strom BL, Guess HA, Hartzema A. Recall accuracy for prescription medications: self-report compared with database information. *Am J Epidemiol.* 1995;142(10):1103–1112. Available at: <http://www.ncbi.nlm.nih.gov/pubmed/7485055>.
6. West SL, Strom BL, Freundlich B, Normand E, Koch G, Savitz DA. Completeness of prescription recording in outpatient medical records from a health maintenance organization. *J Clin Epidemiol.* 1994;47(2):165–171. Available at: <http://www.ncbi.nlm.nih.gov/pubmed/8113825>.
7. Fischer MA, Stedman MR, Lii J, et al. Primary medication non-adherence: analysis of 195,930 electronic prescriptions. *J Gen Intern Med.* 2010;25(4):284–290. Available at: <http://www.ncbi.nlm.nih.gov/pubmed/20131023>.
8. Schneeweiss S, Avorn J. A review of uses of health care utilization databases for epidemiologic research on therapeutics. *J Clin Epidemiol.* 2005;58(4):323–337. Available at: <http://www.ncbi.nlm.nih.gov/pubmed/15862718>.
9. Ray WA. Evaluating medication effects outside of clinical trials: new-user designs. *Am J Epidemiol.* 2003;158(9):915–920. Available at: <http://www.ncbi.nlm.nih.gov/pubmed/14585769>.
10. Johnson ES, Bartman BA, Briesacher BA, et al. The incident user design in comparative effectiveness research. *Pharmacoepidemiol Drug Saf.* 2013;22(1):1–6. Available at: <http://www.ncbi.nlm.nih.gov/pubmed/23023988>.
11. Fleiss J. Determining sample sizes needed to detect a difference between two proportions (chapter 3). In: Fleiss JL, ed. *Statistical methods for rates and proportions*. Chichester, West Sussex, UK: Wiley; 1981.

12. Brookhart MA, Schneeweiss S, Rothman KJ, Glynn RJ, Avorn J, Sturmer T. Variable selection for propensity score models. *Am J Epidemiol.* 2006;163(12):1149–1156. Available at: <http://www.ncbi.nlm.nih.gov/pubmed/16624967>.
13. Myers JA, Rassen JA, Gagne JJ, et al. Effects of adjusting for instrumental variables on bias and precision of effect estimates. *Am J Epidemiol.* 2011;174(11):1213–1222. Available at: <http://www.ncbi.nlm.nih.gov/pubmed/22025356>.
14. Rosenbaum PR, Rubin DB. The central role of propensity scores in observational studies for causal effects. *Biometrika.* 1983;70(1):41–55.
15. Rubin DB. Estimating causal effects from large data sets using propensity scores. *Ann Intern Med.* 1997;127(8 Pt 2):757–763. Available at: <http://www.ncbi.nlm.nih.gov/pubmed/9382394>.
16. Walker A, Patrick, Lauer, et al. A tool for assessing the feasibility of comparative effectiveness research. *Comparative Effectiveness Research.* 2013:11.
17. Franklin JM, Rassen JA, Ackermann D, Bartels DB, Schneeweiss S. Metrics for covariate balance in cohort studies of causal effects. *Stat Med.* 2013. Available at: <http://www.ncbi.nlm.nih.gov/pubmed/24323618>.
18. Akaike H. Fitting autoregressive models for prediction. *Annals of the Institute of Statistical Mathematics.* 1969;21(1):243–247. doi:10.1007/BF02532251.
19. Farrington CP. Residuals for proportional hazards models with interval-censored survival data. *Biometrics.* 2000;56(2):473–482. Available at: <http://www.ncbi.nlm.nih.gov/pubmed/10877306>.
20. Grambsch PM, Therneau TM, Fleming TR. Diagnostic plots to reveal functional form for covariates in multiplicative intensity models. *Biometrics.* 1995;51(4):1469–1482. Available at: <http://www.ncbi.nlm.nih.gov/pubmed/8589234>.
21. Brookhart MA, Sturmer T, Glynn RJ, Rassen J, Schneeweiss S. Confounding control in healthcare database research: challenges and potential approaches. *Med Care.* 2010;48(6 Suppl):S114–S120. Available at: <http://www.ncbi.nlm.nih.gov/pubmed/20473199>.
22. R Core Team. *R: a language and environment for statistical computing.* Vienna, Austria: R Foundation for Statistical Computing; 2013. Available at: <http://www.R-project.org/>.
23. Hosmer DW, Hosmer T, Le Cessie S, Lemeshow S. A comparison of goodness-of-fit tests for the logistic regression model. *Stat Med.* 1997;16(9):965–980. Available at: <http://www.ncbi.nlm.nih.gov/pubmed/9160492>.
24. Belitser SV, Martens EP, Pestman WR, Groenwold RH, Boer A de, Klungel OH. Measuring balance and model selection in propensity score methods. *Pharmacoepidemiol Drug Saf.* 2011;20(11):1115–1129. Available at: <http://www.ncbi.nlm.nih.gov/pubmed/21805529>.
25. Elm E von, Altman DG, Egger M, Pocock SJ, Gøtzsche PC, Vandenbroucke JP. The strengthening the reporting of observational studies in epidemiology (STROBE) statement: guidelines for reporting observational studies. *Lancet.* 2007;370(9596):1453–1457. Available at: <http://www.ncbi.nlm.nih.gov/pubmed/18064739>.



# A pooled analysis of exenatide use and risk of acute pancreatitis

---

## AETION STANDARD ABBREVIATIONS

|       |                                                     |
|-------|-----------------------------------------------------|
| AIC   | Akaike Information Criterion                        |
| CI    | Confidence Interval                                 |
| GLM   | Generalized Linear Model                            |
| HIPAA | Health Insurance Portability and Accountability Act |
| HR    | Hazard Ratio                                        |
| IQR   | Interquartile Range                                 |
| ITT   | Intention-to-Treat                                  |
| OR    | Odds Ratio                                          |
| PS    | Propensity Score                                    |
| RD    | Rate Difference, Risk Difference                    |
| RR    | Rate Ratio, Risk Ratio                              |
| SD    | Standard Deviation                                  |

---

# INTRODUCTION

## **Report Generation**

This is an automated report generated by the Action Evidence Generation Platform using the Safety Evaluation Application version R1.1.20150602\_1625-0-g96defba.

---

## METHODS

### **Study Design**

The study presented is a cohort study. The study design and analytics follow a basic pharmacoepidemiology study design<sup>1</sup> and are reported following the STROBE guideline.<sup>2</sup>

### **Data Sources**

#### *United Optum*

The Optum Research Database, a product of Optum, Inc. (Eden Prairie, MN), consists of pharmacy and medical claims from United Health Group and non-United Health Group commercial insurance plans. The individuals covered by these health plans are geographically diverse across the US, with greatest representation in the South and Northeast US census regions (majority of Medicare Advantage patients are in South and West). Approximately 10% of the commercially-insured population with both medical and pharmacy benefits in the database are employer-sponsored Medicare Advantage beneficiaries. Members have, on average, 2.7 years of continuous enrollment, with 81% having 1 or more medical claims, and 72% having 1 or more pharmacy claim, per year (92% and 81%, for Medicare Advantage members, respectively). The plans provide fully insured coverage for outpatient prescription medication, professional (e.g., physician), and facility (e.g., hospital) services. The medical and pharmacy claims files contain details on date of service, place of service, ICD-9-CM codes, CPT codes, provider type, NDCs, drug quantity dispensed, days supplied, charges, deductibles and copayments. The member file includes information on eligibility periods as well as patient demographic data.

#### *General Notes on Administrative Data*

Electronic outpatient pharmacy dispensing records are considered accurate because pharmacists fill prescriptions with little room for interpretation, and are reimbursed by insurers on the basis of detailed, complete, and accurate claims submitted electronically.<sup>3,4</sup> Pharmacy dispensing information is usually seen as the gold standard of drug exposure information compared to self-reported information<sup>5</sup> or prescribing records in outpatient medical records.<sup>6</sup> Drugs used during hospital stays are not recorded in this data source. Prescribing information based on physician notes may overestimate actual medication use because up to 50% of prescriptions are never filled at the pharmacy.<sup>7</sup>

#### *General Notes on Safety Research with Secondary Healthcare Databases*

Secondary healthcare databases (claims, electronic medical records) are the preferred data source for most post-marketing drug safety research.<sup>8</sup> These data sources reflect health service use patterns, comorbidity, and co-medications of patients in real-world, usual care settings and are therefore suitable to study medication safety and effectiveness in routine care. Because of the large numbers of patients in these databases, it is possible to detect rare safety events.

## Subjects

### *Exposure Groups*

Subjects were defined by exposure to one of two exposure groups between June 01, 2005 and December 31, 2007. The exposure groups were **Use of other hypoglycemic agent** and **Use of Byetta**. Of these, the referent group was defined as **Use of other hypoglycemic agent**. See the appendix for details of exposure group definitions.

Only incident (new) users of these agents were included.<sup>1</sup> Those patients who had been exposed to an agent in their exposure group in the 273 days prior to the cohort entry date were excluded.

Evaluating only incident users has several advantages in the analyses of healthcare databases. It can make patients more similar as they were evaluated by a physician and it was decided to initiate treatment upon review of their health state, it increases the likelihood that patients are at the same phase of treatment, it allows displaying time-varying treatment hazards distinguishing between early and late events, and it provides clear temporality between pre-treatment characteristics and post-treatment events.<sup>9,10</sup>

Only a single cohort entry was allowed per patient. If a patient qualified for the cohort multiple times, the patient entered the cohort on the first qualifying event after exclusion criteria were applied.

Patients were required to be enrolled, as defined by **Enrollment**, on the cohort entry date and during the 273 days prior to cohort entry .

Patients starting an exposure period for more than one exposure group on the cohort entry date were excluded.

### *Study Outcomes*

The following study outcomes were defined:

- **Acute pancreatitis (primary dx)** measured over the time period beginning on the start of the follow-up period, and ending on the end of the follow-up period. The aggregation used is to set to true if this event started.

See the appendix for details of the study outcome definitions.

### *Exclusion Criteria*

Patients were excluded by factors pertaining to: **Pancreatic disease**.

Specifically, the exclusion criteria were defined as:

- **Pancreatic disease** measured over the time period beginning 273 days prior to the cohort entry date, and ending one day prior to the cohort entry date. The aggregation used is to set to true if this event ever occurred.

See the appendix for details of exclusion criteria definitions.

## *Covariates*

### Baseline covariates

This study defined the following basic covariates: **Age category**, and **Gender**. Basic covariates were intended to represent minimal covariate adjustment, such as age and sex. Basic covariates will be included in all models at all times, except for unadjusted analyses.

This study included additional investigator-defined covariates to more fully characterize the patients' health state and/or demographics for this analysis. The additional investigator-specified covariates were: **Region, Neuropathy, Retinopathy, Hypertension, Hyperlipidemia, History of ischemic heart disease, MI history, History of CHF, Stroke, Alcohol use/abuse, Smoking, Overweight/obesity, Cholelithiasis, Cholecystitis, Class I drugs, Class II drugs, Use of fibrates, Use of statins, Use of ACE inhibitor, Use of ARB, Use of antipsychotic, Use of sedative, Use of NSAID, Use of acid suppressing drugs, Total cost, Use of any drug -- generic name, Ambulatory visit, Prior cholecystectomy, Endoscopic retrograde cholangiopancreatography, and Renal impairment or dialysis.**

Only complete cases were included in analyses. Observations with a missing value for any covariate were excluded from the analysis.

### Time-varying covariates

This study defined no time-varying covariates during follow-up.

## *Feasibility Analysis*

In order to determine the feasibility of this study in the selected database, a feasibility study was conducted. The analysis includes calculation of incidence rates or risks in the primary study population for the defined follow-up time. Incidence rates or risks were only reported for the overall population. Values were not reported by exposure status, as to maintain blinding towards the potential findings of this study. An empirically-observed baseline risk was estimated as the number of events in the population divided by the number of patients. Based on this baseline risk, the number of exposed and unexposed patients, and an assumed alpha level of 5%, a simple power analysis was conducted. Using a two-sided chi-square test to compare two proportions we computed the statistical power for relative risks ranging from 1.2 to 4.0.<sup>11</sup>

## **Propensity Score Analysis**

This section describes the general approach to propensity scores used throughout the analysis. Specific uses of the techniques described below are indicated in later sections.

**Estimation of propensity scores.** Propensity scores were estimated using logistic regression. The treatment was specified as the dependent variable. All confounders listed **above** were entered as independent variables without further variable selection.<sup>12,13</sup> Patients' propensity score values were predicted using the resulting regression model.<sup>14,15</sup> A pre-matching model c-statistic provides information on how well baseline covariates can predict treatment choice.

**Untrimmed propensity score analyses.** Propensity scores were divided into deciles and indicators for decile of PS were entered into the outcome model, alongside exposure and basic confounders. The fifth decile was used as the reference category.

**Trimmed propensity score analyses.** Trimmed stratified propensity score analyses were performed.<sup>14,16</sup> Trimming, like PS matching, has been shown to reduce confounding by eliminating patients with highly improbable treatment choices who appear in the extremes of the PS distributions.<sup>16</sup> Symmetric 2.5% trimming was used to removed patients with propensity scores below the 2.5th percentile of the overall propensity score distribution and above the 97.5th percentile of the combined PS distribution. One-sided (asymmetric) trimming was also applied. Among the referent group patients, the 97.5th percentile of propensity score value was determined; any patient from either referent or exposed whose propensity score exceeded this value was removed from the analysis. Similarly, among the exposed patients, the 2.5th percentile of propensity score was determined; any patient whose propensity score was less than this value was removed from the analysis. Deciles of the propensity score were determined from the remaining values, and each patient was assigned an indicator for decile of propensity score. Indicators for decile of PS were entered into the outcome model, alongside exposure and basic confounders. The fifth decile was used as the reference category. Note that after trimming, the study population was at least 5% smaller than the pre-trimming population.

**Propensity score 1:1 matched analyses.** Propensity score matching was performed using 1:1 nearest neighbor matching with a maximum matching caliper (see analysis details sections that follow). In matched propensity score analyses, multivariate adjustment was achieved through the matching process. After matching, the treatment effect measures were directly derived from the balanced populations without any further adjustment.<sup>14</sup> We plot exposure-specific propensity score distributions to inspect the suitability of the comparison group.<sup>17</sup> Differences in the confounder distributions between exposure groups are displayed to inspect successful confounder balance in measured characteristics. A post-matching C-statistic is computed as a summary metric for confounder balance. C-statistics close to 0.5 represent good overall balance.<sup>18</sup>

## **Statistical Analysis**

### *Primary Analysis*

#### Baseline covariate assessment

In the primary analysis, the baseline covariates were assessed by default in the period beginning 273 days prior to the cohort entry date, and ending one day prior to the cohort entry date.

#### Follow-up for Outcomes

The primary analysis used a variable-length follow-up design. Follow-up began on the cohort entry date and was carried out until one of the following events occurred:

- The occurrence of outcome
- Disenrollment
- A calendar date is reached: March 31, 2008
- Termination of index exposure, with a grace period of 31 days and a risk window of 31 days

Poisson models were used to estimate multivariate adjusted rate ratios (RR).<sup>19</sup> The regression model was specified with the outcome as the dependent variable and treatment and the natural log of follow-up time as independent variables. Other covariates were included as independent variables as noted below. Reported diagnostics included the Akaike information criterion (AIC).<sup>20,21</sup>

To quantify the precision of effect estimates, 95% confidence intervals are reported.

#### Variable selection and confounding adjustment

Multivariate models were used to adjust for confounding. The following models were estimated, representing increasing amounts of confounding adjustment: Model with exposure only (crude model); Model with exposure and basic covariates; Model with exposure, basic covariates and additional investigator-specified covariates.<sup>22</sup> All variables were included in the regression models without further selection.

#### Propensity score analysis

The primary analysis included untrimmed, asymmetric 2.5% trimmed, and 1:1 (with a caliper of 5%) propensity score matched analyses.

#### *Software*

All analyses were conducted with the Aetion Evidence Generation Platform using the Safety Evaluation Application, version R1.1.20150602\_1625-0-g96defba. Statistical computations were conducted using R version 3.1.2 (2014-10-31).<sup>23</sup>



---

## RESULTS

### Acute pancreatitis (primary dx) Results

#### *Primary Analysis Results*

#### Population Characteristics for the Primary Patient Population

|                                                        | Less Excluded Patients | Remaining Patients |
|--------------------------------------------------------|------------------------|--------------------|
| All patients                                           |                        | 55,050,262         |
| Did not meet cohort entry criteria                     | -54,267,588            | 782,674            |
| Excluded based on Entry not during enrollment          | -147,584               | 635,090            |
| Excluded based on Referent prior use                   | -428,661               | 206,429            |
| Excluded based on Exposed prior use                    | -2,309                 | 204,120            |
| Excluded based on Entry with multiple exposures        | -68                    | 204,052            |
| Excluded based on Excluded based on Pancreatic disease | -417                   | 203,635            |
| Final cohort                                           |                        | 203,635            |

**Table 1:** CONSORT-style patient flow table

The following table displays population characteristics for the primary patient population. Characteristics displayed below are those that were chosen for confounding adjustment (basic and additional investigator-specified).

| Variable                                 | Value           |
|------------------------------------------|-----------------|
| Number of patients                       | 203,635         |
| Year of Cohort Entry Date                |                 |
| ...2005; n (%)                           | 46,554 (22.9%)  |
| ...2006; n (%)                           | 83,057 (40.8%)  |
| ...2007; n (%)                           | 74,024 (36.4%)  |
| Age category                             |                 |
| ...Age 0 - 34; n (%)                     | 32,898 (16.2%)  |
| ...Age 35 - 44; n (%)                    | 37,736 (18.5%)  |
| ...Age 45 - 54; n (%)                    | 56,709 (27.8%)  |
| ...Age 55 - 64; n (%)                    | 54,737 (26.9%)  |
| ...Age 65+; n (%)                        | 21,555 (10.6%)  |
| Gender                                   |                 |
| ...Male; n (%)                           | 94,668 (46.5%)  |
| ...Female; n (%)                         | 108,931 (53.5%) |
| ...Unknown; n (%)                        | 36 (0.0%)       |
| Region                                   |                 |
| ...Northeast; n (%)                      | 18,030 (8.9%)   |
| ...Midwest; n (%)                        | 54,773 (26.9%)  |
| ...South; n (%)                          | 103,217 (50.7%) |
| ...West; n (%)                           | 27,420 (13.5%)  |
| ...Other; n (%)                          | 195 (0.1%)      |
| Neuropathy; n (%)                        | 9,138 (4.5%)    |
| Retinopathy; n (%)                       | 5,181 (2.5%)    |
| Hypertension; n (%)                      | 102,315 (50.2%) |
| Hyperlipidemia; n (%)                    | 101,073 (49.6%) |
| History of ischemic heart disease; n (%) | 21,761 (10.7%)  |
| MI history; n (%)                        | 3,999 (2.0%)    |
| History of CHF; n (%)                    | 6,998 (3.4%)    |
| Stroke; n (%)                            | 5,722 (2.8%)    |
| Alcohol use/abuse; n (%)                 | 1,644 (0.8%)    |
| Smoking; n (%)                           | 8,813 (4.3%)    |
| Overweight/obesity; n (%)                | 23,722 (11.6%)  |
| Cholelithiasis; n (%)                    | 3 (0.0%)        |
| Cholecystitis; n (%)                     | 1,407 (0.7%)    |
| Class I drugs; n (%)                     | 81,587 (40.1%)  |
| Class II drugs; n (%)                    | 83,922 (41.2%)  |

|                                                       |                       |
|-------------------------------------------------------|-----------------------|
| Use of fibrates; n (%)                                | 10,982 (5.4%)         |
| Use of statins; n (%)                                 | 54,087 (26.6%)        |
| Use of ACE inhibitor; n (%)                           | 45,427 (22.3%)        |
| Use of ARB; n (%)                                     | 27,052 (13.3%)        |
| Use of antipsychotic; n (%)                           | 2,959 (1.5%)          |
| Use of sedative; n (%)                                | 27,839 (13.7%)        |
| Use of NSAID; n (%)                                   | 33,036 (16.2%)        |
| Use of acid suppressing drugs; n (%)                  | 26,357 (12.9%)        |
| Total cost; mean (sd)                                 | 15,723.76 (55,414.13) |
| Use of any drug -- generic name; mean (sd)            | 5.73 (5.24)           |
| Ambulatory visit; mean (sd)                           | 7.32 (12.73)          |
| Prior cholecystectomy; n (%)                          | 1,055 (0.5%)          |
| Endoscopic retrograde cholangiopancreatography; n (%) | 127 (0.1%)            |
| Renal impairment or dialysis; n (%)                   | 4,268 (2.1%)          |

**Table 2:** Unstratified patient characteristics for the primary patient population

The following table displays the characteristics of the primary patient population stratified by exposure status. Characteristics displayed below are those that were chosen for confounding adjustment (basic and additional investigator-specified). The differences in proportions and means of patient characteristics between the exposure and referent groups are displayed with confidence intervals. The *p*-values shown are the *p* for differences on patient characteristics between the exposure and referent groups.

| Variable                  | Use of other hypoglycemic agent | Use of Byetta  | Difference              | p      |
|---------------------------|---------------------------------|----------------|-------------------------|--------|
| Number of patients        | 183,826                         | 19,809         | -                       | -      |
| Year of Cohort Entry Date |                                 |                |                         |        |
| ...2005; n (%)            | 43,335 (23.6%)                  | 3,219 (16.3%)  | 7.3% (6.8%, 7.9%)       | < 0.01 |
| ...2006; n (%)            | 73,533 (40.0%)                  | 9,524 (48.1%)  | -8.1% (-8.8%, -7.3%)    | < 0.01 |
| ...2007; n (%)            | 66,958 (36.4%)                  | 7,066 (35.7%)  | 0.8% (0.0%, 1.5%)       | 0.04   |
| Age category              |                                 |                |                         |        |
| ...Age 0 - 34; n (%)      | 31,958 (17.4%)                  | 940 (4.7%)     | 12.6% (12.3%, 13.0%)    | < 0.01 |
| ...Age 35 - 44; n (%)     | 34,660 (18.9%)                  | 3,076 (15.5%)  | 3.3% (2.8%, 3.9%)       | < 0.01 |
| ...Age 45 - 54; n (%)     | 49,835 (27.1%)                  | 6,874 (34.7%)  | -7.6% (-8.3%, -6.9%)    | < 0.01 |
| ...Age 55 - 64; n (%)     | 47,398 (25.8%)                  | 7,339 (37.0%)  | -11.3% (-12.0%, -10.6%) | < 0.01 |
| ...Age 65+; n (%)         | 19,975 (10.9%)                  | 1,580 (8.0%)   | 2.9% (2.5%, 3.3%)       | < 0.01 |
| Gender                    |                                 |                |                         |        |
| ...Male; n (%)            | 85,942 (46.8%)                  | 8,726 (44.1%)  | 2.7% (2.0%, 3.4%)       | < 0.01 |
| ...Female; n (%)          | 97,850 (53.2%)                  | 11,081 (55.9%) | -2.7% (-3.4%, -2.0%)    | < 0.01 |
| ...Unknown; n (%)         | 34 (0.0%)                       | 2 (0.0%)       | 0.0% (-0.0%, 0.0%)      | 0.57   |
| Region                    |                                 |                |                         |        |
| ...Northeast; n (%)       | 16,642 (9.1%)                   | 1,388 (7.0%)   | 2.0% (1.7%, 2.4%)       | < 0.01 |
| ...Midwest; n (%)         | 49,649 (27.0%)                  | 5,124 (25.9%)  | 1.1% (0.5%, 1.8%)       | < 0.01 |
| ...South; n (%)           | 92,388 (50.3%)                  | 10,829 (54.7%) | -4.4% (-5.1%, -3.7%)    | < 0.01 |
| ...West; n (%)            | 24,960 (13.6%)                  | 2,460 (12.4%)  | 1.2% (0.7%, 1.6%)       | < 0.01 |
| ...Other; n (%)           | 187 (0.1%)                      | 8 (0.0%)       | 0.1% (0.0%, 0.1%)       | 0.01   |
| Neuropathy; n (%)         | 6,659 (3.6%)                    | 2,479 (12.5%)  | -8.9% (-9.4%, -8.4%)    | < 0.01 |

|                                          |                          |                          |                         |        |
|------------------------------------------|--------------------------|--------------------------|-------------------------|--------|
| Retinopathy; n (%)                       | 3,667 (2.0%)             | 1,514 (7.6%)             | -5.6% (-6.0%, -5.3%)    | < 0.01 |
| Hypertension; n (%)                      | 88,128 (47.9%)           | 14,187 (71.6%)           | -23.7% (-24.3%, -23.0%) | < 0.01 |
| Hyperlipidemia; n (%)                    | 86,003 (46.8%)           | 15,070 (76.1%)           | -29.3% (-29.9%, -28.7%) | < 0.01 |
| History of ischemic heart disease; n (%) | 18,678 (10.2%)           | 3,083 (15.6%)            | -5.4% (-5.9%, -4.9%)    | < 0.01 |
| MI history; n (%)                        | 3,634 (2.0%)             | 365 (1.8%)               | 0.1% (-0.1%, 0.3%)      | 0.21   |
| History of CHF; n (%)                    | 6,192 (3.4%)             | 806 (4.1%)               | -0.7% (-1.0%, -0.4%)    | < 0.01 |
| Stroke; n (%)                            | 5,117 (2.8%)             | 605 (3.1%)               | -0.3% (-0.5%, -0.0%)    | 0.03   |
| Alcohol use/abuse; n (%)                 | 1,558 (0.8%)             | 86 (0.4%)                | 0.4% (0.3%, 0.5%)       | < 0.01 |
| Smoking; n (%)                           | 8,237 (4.5%)             | 576 (2.9%)               | 1.6% (1.3%, 1.8%)       | < 0.01 |
| Overweight/obesity; n (%)                | 19,905 (10.8%)           | 3,817 (19.3%)            | -8.4% (-9.0%, -7.9%)    | < 0.01 |
| Cholelithiasis; n (%)                    | 3 (0.0%)                 | 0 (0.0%)                 | 0.0% (-0.0%, 0.0%)      | 1.00   |
| Cholecystitis; n (%)                     | 1,260 (0.7%)             | 147 (0.7%)               | -0.1% (-0.2%, 0.1%)     | 0.38   |
| Class I drugs; n (%)                     | 71,363 (38.8%)           | 10,224 (51.6%)           | -12.8% (-13.5%, -12.1%) | < 0.01 |
| Class II drugs; n (%)                    | 72,768 (39.6%)           | 11,154 (56.3%)           | -16.7% (-17.5%, -16.0%) | < 0.01 |
| Use of fibrates; n (%)                   | 8,270 (4.5%)             | 2,712 (13.7%)            | -9.2% (-9.7%, -8.7%)    | < 0.01 |
| Use of statins; n (%)                    | 42,681 (23.2%)           | 11,406 (57.6%)           | -34.4% (-35.1%, -33.6%) | < 0.01 |
| Use of ACE inhibitor; n (%)              | 36,647 (19.9%)           | 8,780 (44.3%)            | -24.4% (-25.1%, -23.7%) | < 0.01 |
| Use of ARB; n (%)                        | 21,241 (11.6%)           | 5,811 (29.3%)            | -17.8% (-18.4%, -17.1%) | < 0.01 |
| Use of antipsychotic; n (%)              | 2,649 (1.4%)             | 310 (1.6%)               | -0.1% (-0.3%, 0.1%)     | 0.18   |
| Use of sedative; n (%)                   | 23,913 (13.0%)           | 3,926 (19.8%)            | -6.8% (-7.4%, -6.2%)    | < 0.01 |
| Use of NSAID; n (%)                      | 28,916 (15.7%)           | 4,120 (20.8%)            | -5.1% (-5.7%, -4.5%)    | < 0.01 |
| Use of acid suppressing drugs; n (%)     | 22,436 (12.2%)           | 3,921 (19.8%)            | -7.6% (-8.2%, -7.0%)    | < 0.01 |
| Total cost; mean (sd)                    | 15,629.88<br>(57,555.59) | 16,594.94<br>(28,721.82) | -965.06 (-1,443.82, -   | < 0.01 |

|                                                       |              |              |                      |        |
|-------------------------------------------------------|--------------|--------------|----------------------|--------|
|                                                       |              |              | 486.29)              |        |
| Use of any drug -- generic name; mean (sd)            | 5.16 (4.83)  | 11.06 (5.80) | -5.90 (-5.98, -5.81) | < 0.01 |
| Ambulatory visit; mean (sd)                           | 7.16 (13.07) | 8.76 (8.82)  | -1.60 (-1.74, -1.46) | < 0.01 |
| Prior cholecystectomy; n (%)                          | 939 (0.5%)   | 116 (0.6%)   | -0.1% (-0.2%, 0.0%)  | 0.18   |
| Endoscopic retrograde cholangiopancreatography; n (%) | 121 (0.1%)   | 6 (0.0%)     | 0.0% (0.0%, 0.1%)    | 0.08   |
| Renal impairment or dialysis; n (%)                   | 3,669 (2.0%) | 599 (3.0%)   | -1.0% (-1.3%, -0.8%) | < 0.01 |

**Table 3:** Patient characteristics for the primary patient population stratified by exposure status

### Feasibility and Power for the Primary Analysis

The following table displays basic event counts to determine study feasibility for the primary patient population with the analytic parameters specified in the primary analysis.

| Variable                                                     | Value      |
|--------------------------------------------------------------|------------|
| Number of patients in full cohort                            | 203,635    |
| Number of patients dropped as incomplete cases               | 0          |
| Number of patients that did not begin follow-up              | 0          |
| Number of patients in analytic cohort                        | 203,635    |
| Number of events                                             | 142        |
| Number of person-years                                       | 107,572.80 |
| Number of patients in group: Use of other hypoglycemic agent | 183,826    |
| Number of patients in group: Use of Byetta                   | 19,809     |
| Risk per 1,000 patients                                      | 0.70       |
| Rate per 1,000 patients                                      | 1.32       |

**Table 4:** Summary parameters of the study population to inspect study feasibility

The following table displays the power to detect the respective levels of relative risk for the primary patient population with the analytic parameters specified in the primary analysis.

| Observed Ratio of Exposed to Referent | Observed Baseline Risk per 1,000 Patients | Desired Relative Risk | Power |
|---------------------------------------|-------------------------------------------|-----------------------|-------|
| 0.11:1                                | 0.00                                      | 1.05                  | 0.04  |
| 0.11:1                                | 0.00                                      | 1.25                  | 0.16  |
| 0.11:1                                | 0.00                                      | 1.50                  | 0.42  |
| 0.11:1                                | 0.00                                      | 2.00                  | 0.86  |
| 0.11:1                                | 0.00                                      | 3.00                  | 1.00  |
| 0.11:1                                | 0.00                                      | 4.00                  | 1.00  |

**Table 5:** Statistical power to detect a non-null exposure-outcome association at the noted relative risk levels with an alpha of 0.05

### Follow-up of Patients in the Primary Analysis

The following table displays the median follow-up time (in days) and inter-quartile range in the primary patient population as well as follow-up time stratified by exposure group.

| Patient Group              | Median Follow-Up Time (Days) [IQR] |
|----------------------------|------------------------------------|
| Overall Patient Population | 118 [60, 244]                      |
| Referent                   | 117 [60, 243]                      |
| Exposure                   | 121 [60, 248]                      |

**Table 6:** Median follow-up time (in days) and inter-quartile range for the primary patient population and for each exposure group

The following table displays the censoring reasons for the primary patient population and for each exposure group.

|                           | Overall         | Use of other hypoglycemic agent | Use of Byetta  |
|---------------------------|-----------------|---------------------------------|----------------|
| Outcome                   | 142 (0.1%)      | 126 (0.1%)                      | 16 (0.1%)      |
| End of index exposure     | 127,732 (62.7%) | 114,105 (62.1%)                 | 13,627 (68.8%) |
| Specified date reached    | 34,889 (17.1%)  | 32,056 (17.4%)                  | 2,833 (14.3%)  |
| End of patient data       | 0 (0.0%)        | 0 (0.0%)                        | 0 (0.0%)       |
| End of patient enrollment | 40,872 (20.1%)  | 37,539 (20.4%)                  | 3,333 (16.8%)  |

**Table 7:** Reasons for censoring in the primary patient population and for each exposure group

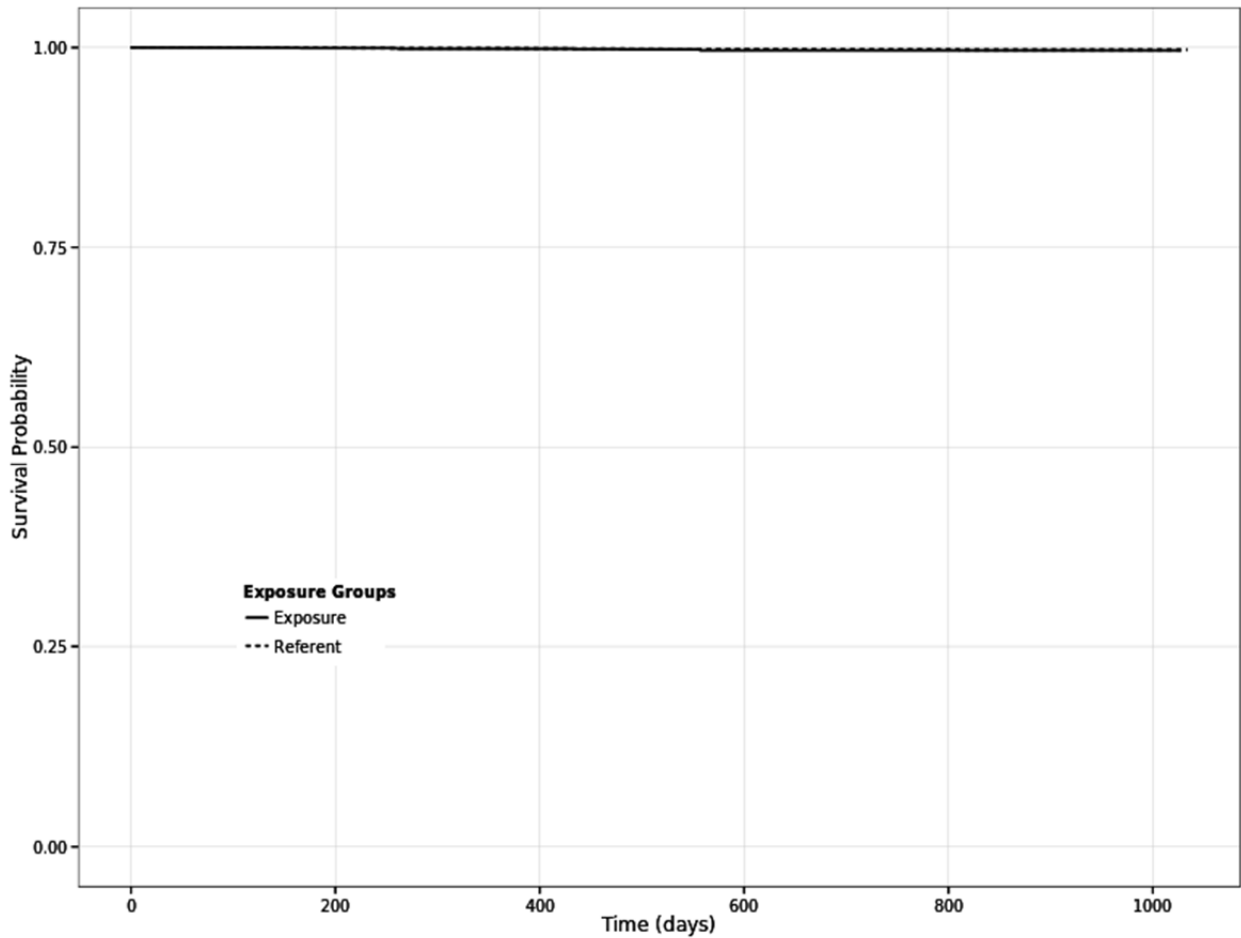

**Figure 1:** Kaplan-Meier plot comparing Use of Byetta (exposure) to Use of other hypoglycemic agent (referent) with respect to the outcome of Acute pancreatitis (primary dx). Time is measured in days.

Treatment Effect Estimates for the Primary Analysis

The table below displays risks by exposure status and risk ratio and risk difference estimates, without confounder adjustment.

| Parameter                                                 | Use of other hypoglycemic agent | Use of Byetta      |
|-----------------------------------------------------------|---------------------------------|--------------------|
| Number of patients                                        | 183,826                         | 19,809             |
| Number of events                                          | 126                             | 16                 |
| Risk per 1,000 patients                                   | 0.69                            | 0.81               |
| Risk ratio (vs. referent; 95% CI)                         | Referent                        | 1.18 (0.70, 1.98)  |
| Risk difference per 1,000 patients (vs. referent; 95% CI) | Referent                        | 0.12 (-0.32, 0.56) |

**Table 8:** Summary of basic risk parameters, stratified by exposure status



The table below displays rates by exposure status and rate ratio and rate difference estimates, without confounder adjustment.

| Parameter                                                     | Use of other hypoglycemic agent | Use of Byetta      |
|---------------------------------------------------------------|---------------------------------|--------------------|
| Number of patients                                            | 183,826                         | 19,809             |
| Number of person-years                                        | 97,300                          | 10,273             |
| Number of events                                              | 126                             | 16                 |
| Rate per 1,000 person-years                                   | 1.29                            | 1.56               |
| Rate ratio (vs. referent; 95% CI)                             | Referent                        | 1.20 (0.71, 2.02)  |
| Rate difference per 1,000 person-years (vs. referent; 95% CI) | Referent                        | 0.26 (-0.53, 1.06) |

**Table 9:** Summary of basic rate parameters, stratified by exposure status

The following table summarizes the observed treatment effect as estimated with varying degrees of confounder adjustment by the selected models, as described in the analytic plan. Details of each model are shown in later sections.

| Model                                                   | Hazard Ratio      | p    |
|---------------------------------------------------------|-------------------|------|
| Unadjusted                                              | 1.20 (0.71, 2.02) | 0.49 |
| Adjusted by basic confounders                           | 1.20 (0.71, 2.02) | 0.50 |
| Adjusted by all confounders                             | 1.20 (0.67, 2.16) | 0.54 |
| Adjusted by basic confounders and deciles of PS         | 1.14 (0.62, 2.10) | 0.66 |
| Adjusted by basic confounders and deciles of trimmed PS | 1.11 (0.60, 2.07) | 0.73 |
| Propensity score matched                                | 1.08 (0.51, 2.30) | 0.84 |

**Table 10:** Summary of ratio measure outcome models with increasing levels of confounding adjustment using Poisson regression model

### Propensity Score Matched Analysis

The following table shows patient characteristics in the 1:1 propensity score matched population, stratified by exposure status. Characteristics displayed below are those used in the propensity score model (basic and additional investigator-specified). The differences in proportions and means of patient characteristics between the exposure and referent groups are displayed with confidence intervals. The *p*-values shown are the *p* for differences on patient characteristics between the exposure and referent groups.

| Variable                  | Use of other hypoglycemic agent | Use of Byetta | Difference           | p    |
|---------------------------|---------------------------------|---------------|----------------------|------|
| Number of patients        | 17,558                          | 17,558        | -                    | -    |
| Year of Cohort Entry Date |                                 |               |                      |      |
| ...2005; n (%)            | 2,813 (16.0%)                   | 2,889 (16.5%) | -0.4% (-1.2%, 0.3%)  | 0.28 |
| ...2006; n (%)            | 8,266 (47.1%)                   | 8,267 (47.1%) | -0.0% (-1.1%, 1.0%)  | 1.00 |
| ...2007; n (%)            | 6,479 (36.9%)                   | 6,402 (36.5%) | 0.4% (-0.6%, 1.5%)   | 0.40 |
| Age category              |                                 |               |                      |      |
| ...Age 0 - 34; n (%)      | 895 (5.1%)                      | 926 (5.3%)    | -0.2% (-0.6%, 0.3%)  | 0.47 |
| ...Age 35 - 44; n (%)     | 2,847 (16.2%)                   | 2,836 (16.2%) | 0.1% (-0.7%, 0.8%)   | 0.88 |
| ...Age 45 - 54; n (%)     | 6,097 (34.7%)                   | 6,045 (34.4%) | 0.3% (-0.7%, 1.3%)   | 0.57 |
| ...Age 55 - 64; n (%)     | 6,283 (35.8%)                   | 6,325 (36.0%) | -0.2% (-1.2%, 0.8%)  | 0.65 |
| ...Age 65+; n (%)         | 1,436 (8.2%)                    | 1,426 (8.1%)  | 0.1% (-0.5%, 0.6%)   | 0.86 |
| Gender                    |                                 |               |                      |      |
| ...Male; n (%)            | 7,506 (42.7%)                   | 7,731 (44.0%) | -1.3% (-2.3%, -0.2%) | 0.02 |
| ...Female; n (%)          | 10,052 (57.3%)                  | 9,825 (56.0%) | 1.3% (0.3%, 2.3%)    | 0.01 |
| ...Unknown; n (%)         | 0 (0.0%)                        | 2 (0.0%)      | -0.0% (-0.0%, 0.0%)  | 0.48 |
| Region                    |                                 |               |                      |      |
| ...Northeast; n (%)       | 1,218 (6.9%)                    | 1,242 (7.1%)  | -0.1% (-0.7%, 0.4%)  | 0.63 |
| ...Midwest; n (%)         | 4,467 (25.4%)                   | 4,546 (25.9%) | -0.4% (-1.4%, 0.5%)  | 0.34 |
| ...South; n (%)           | 9,704 (55.3%)                   | 9,590 (54.6%) | 0.6% (-0.4%, 1.7%)   | 0.23 |
| ...West; n (%)            | 2,165 (12.3%)                   | 2,174 (12.4%) | -0.1% (-0.7%, 0.6%)  | 0.90 |
| ...Other; n (%)           | 4 (0.0%)                        | 6 (0.0%)      | -0.0% (-0.1%, 0.0%)  | 0.75 |
| Neuropathy; n (%)         | 1,654 (9.4%)                    | 1,760 (10.0%) | -0.6% (-1.2%, 0.0%)  | 0.06 |

|                                          |                       |                       |                          |        |
|------------------------------------------|-----------------------|-----------------------|--------------------------|--------|
| Retinopathy; n (%)                       | 908 (5.2%)            | 1,014 (5.8%)          | -0.6% (-1.1%, -0.1%)     | 0.01   |
| Hypertension; n (%)                      | 12,404 (70.6%)        | 12,227 (69.6%)        | 1.0% (0.0%, 2.0%)        | 0.04   |
| Hyperlipidemia; n (%)                    | 13,079 (74.5%)        | 13,005 (74.1%)        | 0.4% (-0.5%, 1.3%)       | 0.37   |
| History of ischemic heart disease; n (%) | 2,666 (15.2%)         | 2,573 (14.7%)         | 0.5% (-0.2%, 1.3%)       | 0.17   |
| MI history; n (%)                        | 323 (1.8%)            | 313 (1.8%)            | 0.1% (-0.2%, 0.3%)       | 0.72   |
| History of CHF; n (%)                    | 647 (3.7%)            | 667 (3.8%)            | -0.1% (-0.5%, 0.3%)      | 0.59   |
| Stroke; n (%)                            | 537 (3.1%)            | 510 (2.9%)            | 0.2% (-0.2%, 0.5%)       | 0.41   |
| Alcohol use/abuse; n (%)                 | 85 (0.5%)             | 82 (0.5%)             | 0.0% (-0.1%, 0.2%)       | 0.88   |
| Smoking; n (%)                           | 605 (3.4%)            | 534 (3.0%)            | 0.4% (0.0%, 0.8%)        | 0.03   |
| Overweight/obesity; n (%)                | 3,227 (18.4%)         | 3,134 (17.8%)         | 0.5% (-0.3%, 1.3%)       | 0.20   |
| Cholelithiasis; n (%)                    | 0 (0.0%)              | 0 (0.0%)              | 0.0% (0.0%, 0.0%)        | -      |
| Cholecystitis; n (%)                     | 138 (0.8%)            | 130 (0.7%)            | 0.0% (-0.1%, 0.2%)       | 0.67   |
| Class I drugs; n (%)                     | 9,282 (52.9%)         | 8,840 (50.3%)         | 2.5% (1.5%, 3.6%)        | < 0.01 |
| Class II drugs; n (%)                    | 9,885 (56.3%)         | 9,666 (55.1%)         | 1.2% (0.2%, 2.3%)        | 0.02   |
| Use of fibrates; n (%)                   | 2,194 (12.5%)         | 2,148 (12.2%)         | 0.3% (-0.4%, 1.0%)       | 0.47   |
| Use of statins; n (%)                    | 9,527 (54.3%)         | 9,545 (54.4%)         | -0.1% (-1.2%, 0.9%)      | 0.86   |
| Use of ACE inhibitor; n (%)              | 7,373 (42.0%)         | 7,327 (41.7%)         | 0.3% (-0.8%, 1.3%)       | 0.63   |
| Use of ARB; n (%)                        | 4,911 (28.0%)         | 4,818 (27.4%)         | 0.5% (-0.4%, 1.5%)       | 0.27   |
| Use of antipsychotic; n (%)              | 306 (1.7%)            | 270 (1.5%)            | 0.2% (-0.1%, 0.5%)       | 0.14   |
| Use of sedative; n (%)                   | 3,579 (20.4%)         | 3,410 (19.4%)         | 1.0% (0.1%, 1.8%)        | 0.02   |
| Use of NSAID; n (%)                      | 3,765 (21.4%)         | 3,581 (20.4%)         | 1.0% (0.2%, 1.9%)        | 0.02   |
| Use of acid suppressing drugs; n (%)     | 3,487 (19.9%)         | 3,313 (18.9%)         | 1.0% (0.2%, 1.8%)        | 0.02   |
| Total cost; mean (sd)                    | 16,468.94 (29,391.02) | 15,836.34 (29,046.46) | 632.59 (21.36, 1,243.83) | 0.04   |

|                                                       |              |              |                     |        |
|-------------------------------------------------------|--------------|--------------|---------------------|--------|
| Use of any drug -- generic name; mean (sd)            | 10.46 (6.84) | 10.25 (5.25) | 0.21 (0.09, 0.34)   | < 0.01 |
| Ambulatory visit; mean (sd)                           | 8.70 (8.69)  | 8.42 (8.77)  | 0.29 (0.10, 0.47)   | < 0.01 |
| Prior cholecystectomy; n (%)                          | 117 (0.7%)   | 104 (0.6%)   | 0.1% (-0.1%, 0.2%)  | 0.42   |
| Endoscopic retrograde cholangiopancreatography; n (%) | 4 (0.0%)     | 6 (0.0%)     | -0.0% (-0.1%, 0.0%) | 0.75   |
| Renal impairment or dialysis; n (%)                   | 496 (2.8%)   | 470 (2.7%)   | 0.1% (-0.2%, 0.5%)  | 0.41   |

**Table 11:** Details of patient population in propensity score matched cohort

The table below displays risks by exposure status and risk ratio and risk difference estimates, without confounder adjustment after 1:1 propensity score matching.

| Parameter                                                 | Use of other hypoglycemic agent | Use of Byetta       |
|-----------------------------------------------------------|---------------------------------|---------------------|
| Number of patients                                        | 17,558                          | 17,558              |
| Number of events                                          | 14                              | 13                  |
| Risk per 1,000 patients                                   | 0.80                            | 0.74                |
| Risk ratio (vs. referent; 95% CI)                         | Referent                        | 0.93 (0.44, 1.97)   |
| Risk difference per 1,000 patients (vs. referent; 95% CI) | Referent                        | -0.06 (-0.69, 0.58) |

**Table 12:** Summary of basic risk parameters in the propensity score matched cohort

The table below displays event rates by exposure status and rate ratio and rate difference estimates, without confounder adjustment after 1:1 propensity score matching.

| Parameter                                                     | Use of other hypoglycemic agent | Use of Byetta      |
|---------------------------------------------------------------|---------------------------------|--------------------|
| Number of patients                                            | 17,558                          | 17,558             |
| Number of person-years                                        | 10,488                          | 9,024              |
| Number of events                                              | 14                              | 13                 |
| Rate per 1,000 person-years                                   | 1.33                            | 1.44               |
| Rate ratio (vs. referent; 95% CI)                             | Referent                        | 1.08 (0.51, 2.30)  |
| Rate difference per 1,000 person-years (vs. referent; 95% CI) | Referent                        | 0.11 (-0.94, 1.16) |

**Table 13:** Summary of basic rate parameters in the propensity score matched cohort

### Stratified Propensity Score Analysis

The following table shows the patient characteristics after applying symmetric propensity score trimming.

| Variable                  | Use of other hypoglycemic agent | Use of Byetta  | Difference              | p      |
|---------------------------|---------------------------------|----------------|-------------------------|--------|
| Number of patients        | 179,063                         | 19,286         | -                       | -      |
| Year of Cohort Entry Date |                                 |                |                         |        |
| ...2005; n (%)            | 41,253 (23.0%)                  | 3,133 (16.2%)  | 6.8% (6.2%, 7.4%)       | < 0.01 |
| ...2006; n (%)            | 72,321 (40.4%)                  | 9,236 (47.9%)  | -7.5% (-8.2%, -6.8%)    | < 0.01 |
| ...2007; n (%)            | 65,489 (36.6%)                  | 6,917 (35.9%)  | 0.7% (-0.0%, 1.4%)      | 0.05   |
| Age category              |                                 |                |                         |        |
| ...Age 0 - 34; n (%)      | 31,137 (17.4%)                  | 931 (4.8%)     | 12.6% (12.2%, 12.9%)    | < 0.01 |
| ...Age 35 - 44; n (%)     | 34,301 (19.2%)                  | 3,022 (15.7%)  | 3.5% (2.9%, 4.0%)       | < 0.01 |
| ...Age 45 - 54; n (%)     | 49,086 (27.4%)                  | 6,697 (34.7%)  | -7.3% (-8.0%, -6.6%)    | < 0.01 |
| ...Age 55 - 64; n (%)     | 46,353 (25.9%)                  | 7,094 (36.8%)  | -10.9% (-11.6%, -10.2%) | < 0.01 |
| ...Age 65+; n (%)         | 18,186 (10.2%)                  | 1,542 (8.0%)   | 2.2% (1.8%, 2.6%)       | < 0.01 |
| Gender                    |                                 |                |                         |        |
| ...Male; n (%)            | 83,199 (46.5%)                  | 8,518 (44.2%)  | 2.3% (1.6%, 3.0%)       | < 0.01 |
| ...Female; n (%)          | 95,832 (53.5%)                  | 10,766 (55.8%) | -2.3% (-3.0%, -1.6%)    | < 0.01 |
| ...Unknown; n (%)         | 32 (0.0%)                       | 2 (0.0%)       | 0.0% (-0.0%, 0.0%)      | 0.64   |
| Region                    |                                 |                |                         |        |
| ...Northeast; n (%)       | 16,003 (8.9%)                   | 1,346 (7.0%)   | 2.0% (1.6%, 2.3%)       | < 0.01 |
| ...Midwest; n (%)         | 48,124 (26.9%)                  | 4,991 (25.9%)  | 1.0% (0.3%, 1.7%)       | < 0.01 |
| ...South; n (%)           | 90,389 (50.5%)                  | 10,545 (54.7%) | -4.2% (-4.9%, -3.5%)    | < 0.01 |
| ...West; n (%)            | 24,382 (13.6%)                  | 2,396 (12.4%)  | 1.2% (0.7%, 1.7%)       | < 0.01 |
| ...Other; n (%)           | 165 (0.1%)                      | 8 (0.0%)       | 0.1% (0.0%, 0.1%)       | 0.03   |
| Neuropathy; n (%)         | 6,306 (3.5%)                    | 2,203 (11.4%)  | -7.9% (-8.4%, -7.4%)    | < 0.01 |
| Retinopathy; n (%)        | 3,551 (2.0%)                    | 1,331 (6.9%)   | -4.9% (-5.3%, -         | <      |

|                                          |                       |                       |                                  |        |
|------------------------------------------|-----------------------|-----------------------|----------------------------------|--------|
|                                          |                       |                       | 4.6%)                            | 0.01   |
| Hypertension; n (%)                      | 85,159 (47.6%)        | 13,717 (71.1%)        | -23.6% (-24.2%, -22.9%)          | < 0.01 |
| Hyperlipidemia; n (%)                    | 84,549 (47.2%)        | 14,602 (75.7%)        | -28.5% (-29.1%, -27.8%)          | < 0.01 |
| History of ischemic heart disease; n (%) | 16,903 (9.4%)         | 2,933 (15.2%)         | -5.8% (-6.3%, -5.2%)             | < 0.01 |
| MI history; n (%)                        | 2,880 (1.6%)          | 348 (1.8%)            | -0.2% (-0.4%, 0.0%)              | 0.04   |
| History of CHF; n (%)                    | 4,804 (2.7%)          | 747 (3.9%)            | -1.2% (-1.5%, -0.9%)             | < 0.01 |
| Stroke; n (%)                            | 4,178 (2.3%)          | 586 (3.0%)            | -0.7% (-1.0%, -0.5%)             | < 0.01 |
| Alcohol use/abuse; n (%)                 | 1,200 (0.7%)          | 85 (0.4%)             | 0.2% (0.1%, 0.3%)                | < 0.01 |
| Smoking; n (%)                           | 7,314 (4.1%)          | 558 (2.9%)            | 1.2% (0.9%, 1.4%)                | < 0.01 |
| Overweight/obesity; n (%)                | 19,522 (10.9%)        | 3,634 (18.8%)         | -7.9% (-8.5%, -7.4%)             | < 0.01 |
| Cholelithiasis; n (%)                    | 0 (0.0%)              | 0 (0.0%)              | 0.0% (0.0%, 0.0%)                | -      |
| Cholecystitis; n (%)                     | 1,141 (0.6%)          | 141 (0.7%)            | -0.1% (-0.2%, 0.0%)              | 0.13   |
| Class I drugs; n (%)                     | 68,664 (38.3%)        | 9,816 (50.9%)         | -12.6% (-13.3%, -11.8%)          | < 0.01 |
| Class II drugs; n (%)                    | 70,604 (39.4%)        | 10,761 (55.8%)        | -16.4% (-17.1%, -15.6%)          | < 0.01 |
| Use of fibrates; n (%)                   | 8,185 (4.6%)          | 2,553 (13.2%)         | -8.7% (-9.2%, -8.2%)             | < 0.01 |
| Use of statins; n (%)                    | 42,163 (23.5%)        | 10,980 (56.9%)        | -33.4% (-34.1%, -32.7%)          | < 0.01 |
| Use of ACE inhibitor; n (%)              | 36,109 (20.2%)        | 8,450 (43.8%)         | -23.6% (-24.4%, -22.9%)          | < 0.01 |
| Use of ARB; n (%)                        | 20,978 (11.7%)        | 5,550 (28.8%)         | -17.1% (-17.7%, -16.4%)          | < 0.01 |
| Use of antipsychotic; n (%)              | 2,365 (1.3%)          | 298 (1.5%)            | -0.2% (-0.4%, -0.0%)             | 0.01   |
| Use of sedative; n (%)                   | 22,681 (12.7%)        | 3,724 (19.3%)         | -6.6% (-7.2%, -6.1%)             | < 0.01 |
| Use of NSAID; n (%)                      | 28,149 (15.7%)        | 3,969 (20.6%)         | -4.9% (-5.5%, -4.3%)             | < 0.01 |
| Use of acid suppressing drugs; n (%)     | 21,320 (11.9%)        | 3,710 (19.2%)         | -7.3% (-7.9%, -6.8%)             | < 0.01 |
| Total cost; mean (sd)                    | 11,606.50 (27,776.43) | 15,926.88 (27,117.71) | -4,320.38 (-4,724.17, -3,916.60) | < 0.01 |
| Use of any drug -- generic name;         | 5.13 (4.74)           | 10.72 (5.35)          | -5.58 (-5.66, -                  | <      |

|                                                       |              |             |                      |        |
|-------------------------------------------------------|--------------|-------------|----------------------|--------|
| mean (sd)                                             |              |             | 5.50)                | 0.01   |
| Ambulatory visit; mean (sd)                           | 6.20 (7.57)  | 8.50 (8.41) | -2.30 (-2.43, -2.18) | < 0.01 |
| Prior cholecystectomy; n (%)                          | 847 (0.5%)   | 111 (0.6%)  | -0.1% (-0.2%, 0.0%)  | 0.06   |
| Endoscopic retrograde cholangiopancreatography; n (%) | 82 (0.0%)    | 5 (0.0%)    | 0.0% (-0.0%, 0.0%)   | 0.28   |
| Renal impairment or dialysis; n (%)                   | 2,884 (1.6%) | 554 (2.9%)  | -1.3% (-1.5%, -1.0%) | < 0.01 |

**Table 14:** Patient characteristics in the trimmed population using symmetric propensity score trimming

### *Details of Outcome Models*

The following sections detail the regression models used in each analysis. Regression coefficients, confidence intervals and *p*-values are displayed for all regression parameters.

#### Primary Analysis Outcome Model Details

| Variable      | Hazard Ratio      | p    |
|---------------|-------------------|------|
| Use of Byetta | 1.20 (0.71, 2.02) | 0.49 |

**Table 15:** Unadjusted Poisson regression model

| Variable                       | Hazard Ratio                 | p    |
|--------------------------------|------------------------------|------|
| Use of Byetta                  | 1.20 (0.71, 2.02)            | 0.50 |
| Year of Cohort Entry Date/2006 | 0.74 (0.50, 1.11)            | 0.15 |
| Year of Cohort Entry Date/2007 | 1.04 (0.68, 1.59)            | 0.85 |
| Age category/Age 0 - 34        | 0.58 (0.27, 1.24)            | 0.16 |
| Age category/Age 35 - 44       | 0.79 (0.45, 1.39)            | 0.41 |
| Age category/Age 45 - 54       | 1.31 (0.87, 1.95)            | 0.19 |
| Age category/Age 65+           | 1.38 (0.82, 2.32)            | 0.23 |
| Gender/Female                  | 0.75 (0.54, 1.06)            | 0.10 |
| Gender/Unknown                 | < 0.001 (< 0.001, > 999.999) | 0.98 |

**Table 16:** Multivariate Poisson regression model adjusted by basic covariates



| Variable                          | Hazard Ratio                   | p      |
|-----------------------------------|--------------------------------|--------|
| Use of Byetta                     | 1.20 (0.67, 2.16)              | 0.54   |
| Year of Cohort Entry Date/2006    | 0.76 (0.50, 1.13)              | 0.18   |
| Year of Cohort Entry Date/2007    | 1.04 (0.68, 1.59)              | 0.85   |
| Age category/Age 0 - 34           | 0.68 (0.31, 1.52)              | 0.35   |
| Age category/Age 35 - 44          | 0.84 (0.47, 1.49)              | 0.54   |
| Age category/Age 45 - 54          | 1.31 (0.87, 1.96)              | 0.20   |
| Age category/Age 65+              | 1.34 (0.78, 2.29)              | 0.29   |
| Gender/Female                     | 0.71 (0.50, 1.02)              | 0.06   |
| Gender/Unknown                    | < 0.001 (< 0.001, > 999.999)   | 1.00   |
| Region/Northeast                  | > 999.999 (< 0.001, > 999.999) | 0.99   |
| Region/Midwest                    | > 999.999 (< 0.001, > 999.999) | 0.99   |
| Region/South                      | > 999.999 (< 0.001, > 999.999) | 0.99   |
| Region/West                       | > 999.999 (< 0.001, > 999.999) | 0.99   |
| Neuropathy                        | 0.85 (0.39, 1.86)              | 0.68   |
| Retinopathy                       | 0.74 (0.23, 2.37)              | 0.61   |
| Hypertension                      | 1.04 (0.69, 1.57)              | 0.85   |
| Hyperlipidemia                    | 1.11 (0.75, 1.64)              | 0.61   |
| History of ischemic heart disease | 0.77 (0.43, 1.39)              | 0.39   |
| MI history                        | 0.78 (0.22, 2.75)              | 0.70   |
| History of CHF                    | 1.11 (0.48, 2.59)              | 0.80   |
| Stroke                            | 2.11 (1.05, 4.22)              | 0.04   |
| Alcohol use/abuse                 | 2.95 (1.06, 8.25)              | 0.04   |
| Smoking                           | 2.12 (1.20, 3.76)              | < 0.01 |
| Overweight/obesity                | 1.07 (0.65, 1.78)              | 0.78   |
| Cholelithiasis                    | < 0.001 (< 0.001, > 999.999)   | 1.00   |
| Cholecystitis                     | 0.60 (0.02, 16.10)             | 0.76   |
| Class I drugs                     | 1.05 (0.71, 1.57)              | 0.80   |
| Class II drugs                    | 1.70 (1.15, 2.50)              | < 0.01 |
| Use of fibrates                   | 1.86 (1.12, 3.12)              | 0.02   |
| Use of statins                    | 0.78 (0.52, 1.18)              | 0.24   |
| Use of ACE inhibitor              | 0.93 (0.61, 1.41)              | 0.74   |
| Use of ARB                        | 0.75 (0.45, 1.25)              | 0.28   |
| Use of antipsychotic              | < 0.001 (< 0.001, > 999.999)   | 0.97   |
| Use of sedative                   | 0.96 (0.58, 1.59)              | 0.87   |
| Use of NSAID                      | 1.31 (0.87, 1.99)              | 0.20   |
| Use of acid suppressing drugs     | 1.39 (0.89, 2.18)              | 0.14   |
| Total cost                        | 1.00 (1.00, 1.00)              | 0.61   |
| Use of any drug -- generic name   | 1.00 (0.95, 1.05)              | 0.97   |
| Ambulatory visit                  | 1.00 (0.99, 1.02)              | 0.49   |

|                                                |                              |      |
|------------------------------------------------|------------------------------|------|
| Prior cholecystectomy                          | 3.86 (0.14, 105.58)          | 0.42 |
| Endoscopic retrograde cholangiopancreatography | < 0.001 (< 0.001, > 999.999) | 0.99 |
| Renal impairment or dialysis                   | 2.16 (0.94, 4.96)            | 0.07 |

**Table 17:** Multivariate Poisson regression model adjusted by all covariates

| Variable      | Hazard Ratio      | p    |
|---------------|-------------------|------|
| Use of Byetta | 1.08 (0.51, 2.30) | 0.84 |

**Table 18:** Multivariate Poisson regression model adjusted by deciles of propensity score

| Variable                       | Hazard Ratio                 | p    |
|--------------------------------|------------------------------|------|
| Use of Byetta                  | 1.14 (0.62, 2.10)            | 0.66 |
| Year of Cohort Entry Date/2006 | 0.81 (0.54, 1.24)            | 0.33 |
| Year of Cohort Entry Date/2007 | 1.12 (0.73, 1.72)            | 0.61 |
| Age category/Age 0 - 34        | 0.46 (0.21, 1.03)            | 0.06 |
| Age category/Age 35 - 44       | 0.80 (0.46, 1.42)            | 0.45 |
| Age category/Age 45 - 54       | 1.33 (0.89, 1.99)            | 0.17 |
| Age category/Age 65+           | 1.22 (0.71, 2.09)            | 0.47 |
| Gender/Female                  | 0.78 (0.55, 1.10)            | 0.15 |
| Gender/Unknown                 | < 0.001 (< 0.001, > 999.999) | 0.98 |
| PS_DECILE/Propensity Score 1   | 2.14 (1.01, 4.53)            | 0.05 |
| PS_DECILE/Propensity Score 2   | 1.48 (0.68, 3.24)            | 0.32 |
| PS_DECILE/Propensity Score 3   | 1.05 (0.46, 2.39)            | 0.90 |
| PS_DECILE/Propensity Score 4   | 1.37 (0.64, 2.93)            | 0.42 |
| PS_DECILE/Propensity Score 5   | 0.70 (0.29, 1.71)            | 0.43 |
| PS_DECILE/Propensity Score 7   | 0.78 (0.34, 1.81)            | 0.56 |
| PS_DECILE/Propensity Score 8   | 1.39 (0.67, 2.86)            | 0.37 |
| PS_DECILE/Propensity Score 9   | 1.06 (0.49, 2.28)            | 0.88 |
| PS_DECILE/Propensity Score 10  | 1.33 (0.61, 2.90)            | 0.47 |

**Table 19:** Multivariate Poisson regression model adjusted by basic confounders and deciles of untrimmed propensity score

| Variable                              | Hazard Ratio                 | p    |
|---------------------------------------|------------------------------|------|
| Use of Byetta                         | 1.11 (0.60, 2.07)            | 0.73 |
| Year of Cohort Entry Date/2006        | 0.81 (0.53, 1.24)            | 0.33 |
| Year of Cohort Entry Date/2007        | 1.14 (0.73, 1.77)            | 0.56 |
| Age category/Age 0 - 34               | 0.44 (0.19, 1.02)            | 0.05 |
| Age category/Age 35 - 44              | 0.81 (0.46, 1.43)            | 0.46 |
| Age category/Age 45 - 54              | 1.32 (0.88, 1.99)            | 0.18 |
| Age category/Age 65+                  | 1.12 (0.63, 2.00)            | 0.69 |
| Gender/Female                         | 0.75 (0.53, 1.06)            | 0.10 |
| Gender/Unknown                        | < 0.001 (< 0.001, > 999.999) | 0.98 |
| PS_TRIMMED_DECILE/Propensity Score 1  | 1.77 (0.78, 4.01)            | 0.17 |
| PS_TRIMMED_DECILE/Propensity Score 2  | 1.72 (0.78, 3.77)            | 0.18 |
| PS_TRIMMED_DECILE/Propensity Score 3  | 1.54 (0.70, 3.36)            | 0.28 |
| PS_TRIMMED_DECILE/Propensity Score 4  | 0.99 (0.42, 2.32)            | 0.97 |
| PS_TRIMMED_DECILE/Propensity Score 5  | 0.76 (0.31, 1.89)            | 0.55 |
| PS_TRIMMED_DECILE/Propensity Score 7  | 1.02 (0.45, 2.31)            | 0.97 |
| PS_TRIMMED_DECILE/Propensity Score 8  | 1.35 (0.63, 2.89)            | 0.44 |
| PS_TRIMMED_DECILE/Propensity Score 9  | 1.16 (0.53, 2.54)            | 0.71 |
| PS_TRIMMED_DECILE/Propensity Score 10 | 1.39 (0.62, 3.10)            | 0.42 |

**Table 20:** Multivariate Poisson regression model adjusted by basic confounders and deciles of trimmed propensity score

### *Diagnostics*

#### Primary Analysis Model Diagnostics

The following section describes diagnostics for the outcome models. Values include the c-statistic, Akaike information criterion (AIC), and goodness-of-fit p-values.<sup>24</sup>

The following table shows model diagnostics for the outcome model adjusted by all covariates.

| Parameter          | Value                   |
|--------------------|-------------------------|
| Model Type         | Poisson Log Time Offset |
| Convergence Status | OK                      |
| c-statistic        | -                       |
| AIC                | 2,617.36                |
| g.o.f. p-value     | -                       |

**Table 21:** Model diagnostics for Poisson regression model adjusted by all covariates

## Primary Analysis Propensity Score Model Diagnostics

This section describes diagnostics for the propensity scores. Key diagnostics are overlap of the propensity scores before matching, differences among individual confounders post-matching (see earlier results section), and a post-matching c-statistic to inspect balance across all confounders jointly. Ideal post-matching confounder differences are close to zero; ideal post-matching c-statistics are close to 0.5.<sup>18,25</sup>

The following figure displays the propensity score overlap prior to matching. Propensity score overlap is an important diagnostic for whether the use of propensity scores is appropriate for the analytic case at hand. The x-axis shows the range of propensity scores (0 to 1), and the y-axis shows the density of patients. The vertical lines indicate the trimming boundaries, which are the 2.5th percentile of propensity score in the exposed group and the 97.5th percentile of propensity score in the referent group; the red areas indicate patients who would be trimmed in a trimmed propensity score analysis. Generally speaking, patients in the referent group should tend to have lower propensity scores, while those in the exposure group should have higher propensity scores. If only a small proportion of patients are captured in the region of overlap between the exposure-specific propensity scores the appropriateness of the comparison group needs to be questioned or the possibility that a factor resembling an instrumental variable was included in the propensity score model should be explored.[Walker J Clin Epi 2013]

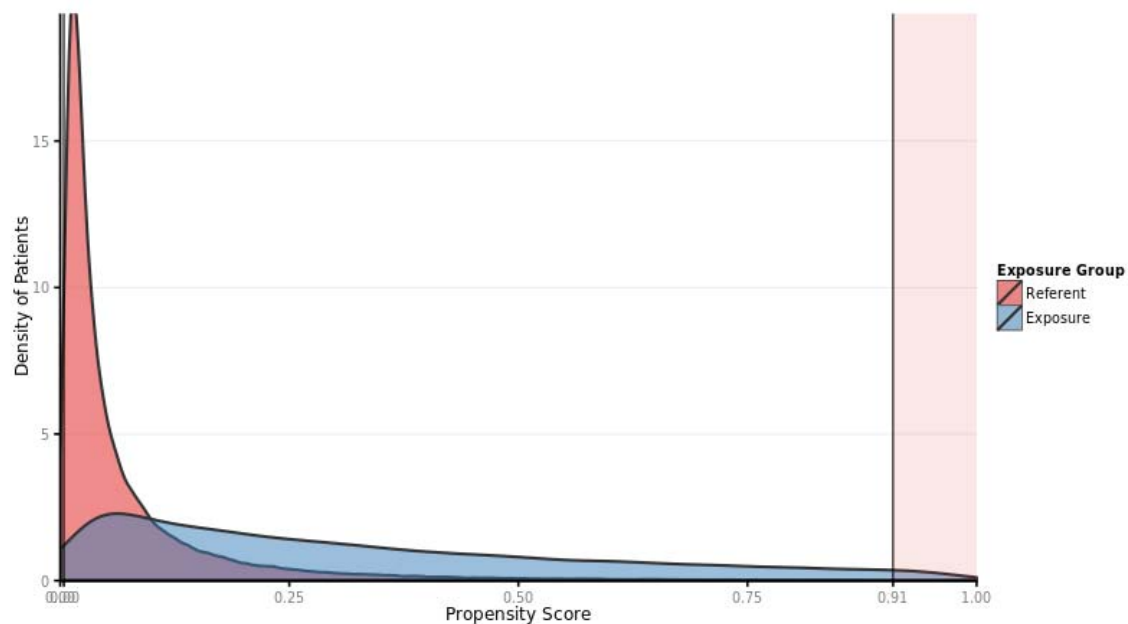

**Figure 2:** Pre-matching propensity score overlap

The following figure displays the propensity score overlap after matching. After 1:1 matching, the curves in the plot below should be nearly overlapping. If variable ratio matching is used, the height of the curves may vary.

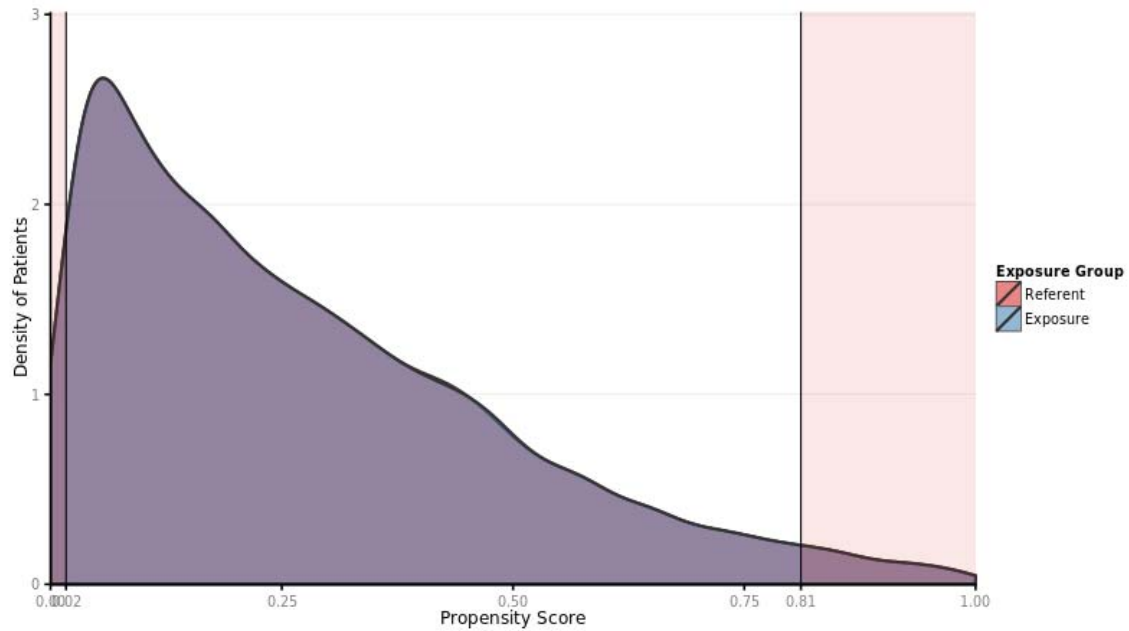

**Figure 3:** Post-matching propensity score overlap

The following table displays absolute standardized differences between the exposed and referent groups for all confounders, as measured in the unmatched and propensity score-matched cohorts. Smaller differences indicate more balance among confounders. Austin suggests that absolute standardized differences of  $<0.1$  indicate sufficient balance for confounding control.[Austin Stat Med 2009]

| Variable                                          | Abs. Std. Diff.<br>(Unmatched) | Abs. Std. Diff.<br>(Matched) | Change | Change<br>(%) |
|---------------------------------------------------|--------------------------------|------------------------------|--------|---------------|
| Year of Cohort Entry Date                         | 0.234                          | 0.013                        | -0.221 | -94.4%        |
| Age category                                      | 0.347                          | 0.012                        | -0.335 | -96.5%        |
| Gender                                            | 0.055                          | 0.030                        | -0.025 | -45.0%        |
| Region                                            | 0.161                          | 0.030                        | -0.131 | -81.2%        |
| Neuropathy                                        | 0.331                          | 0.020                        | -0.311 | -93.8%        |
| Retinopathy                                       | 0.266                          | 0.027                        | -0.240 | -90.0%        |
| Hypertension                                      | 0.498                          | 0.022                        | -0.476 | -95.6%        |
| Hyperlipidemia                                    | 0.631                          | 0.010                        | -0.621 | -98.5%        |
| History of ischemic heart disease                 | 0.162                          | 0.015                        | -0.147 | -90.8%        |
| MI history                                        | 0.010                          | 0.004                        | -0.006 | -56.5%        |
| History of CHF                                    | 0.037                          | 0.006                        | -0.031 | -83.8%        |
| Stroke                                            | 0.016                          | 0.009                        | -0.007 | -43.7%        |
| Alcohol use/abuse                                 | 0.052                          | 0.002                        | -0.049 | -95.2%        |
| Smoking                                           | 0.083                          | 0.023                        | -0.061 | -72.7%        |
| Overweight/obesity                                | 0.238                          | 0.014                        | -0.224 | -94.2%        |
| Cholelithiasis                                    | 0.006                          | -                            | -      | -             |
| Cholecystitis                                     | 0.007                          | 0.005                        | -0.001 | -22.2%        |
| Class I drugs                                     | 0.259                          | 0.050                        | -0.209 | -80.6%        |
| Class II drugs                                    | 0.340                          | 0.025                        | -0.314 | -92.6%        |
| Use of fibrates                                   | 0.324                          | 0.008                        | -0.316 | -97.5%        |
| Use of statins                                    | 0.748                          | 0.002                        | -0.746 | -99.7%        |
| Use of ACE inhibitor                              | 0.541                          | 0.005                        | -0.536 | -99.0%        |
| Use of ARB                                        | 0.452                          | 0.012                        | -0.440 | -97.4%        |
| Use of antipsychotic                              | 0.010                          | 0.016                        | 0.006  | 58.5%         |
| Use of sedative                                   | 0.185                          | 0.024                        | -0.161 | -86.9%        |
| Use of NSAID                                      | 0.131                          | 0.026                        | -0.106 | -80.4%        |
| Use of acid suppressing drugs                     | 0.208                          | 0.025                        | -0.183 | -87.9%        |
| Total cost                                        | 0.021                          | 0.022                        | 0.000  | 2.0%          |
| Use of any drug -- generic name                   | 1.104                          | 0.035                        | -1.069 | -96.8%        |
| Ambulatory visit                                  | 0.143                          | 0.033                        | -0.111 | -77.1%        |
| Prior cholecystectomy                             | 0.010                          | 0.009                        | -0.001 | -7.6%         |
| Endoscopic retrograde<br>cholangiopancreatography | 0.016                          | 0.007                        | -0.009 | -58.4%        |
| Renal impairment or dialysis                      | 0.066                          | 0.009                        | -0.057 | -86.2%        |

**Table 22:** Absolute standardized confounder differences as measured in the unmatched and propensity score-matched cohorts

The following table displays c-statistics and absolute standardized confounder differences as measured within the 10 deciles of the stratified propensity score. An ideal c-statistic is 0.5, indicating no predictive value of the variables with the decile.[Franklin Stat Med 2014]

| Decile        | Mean Absolute Std. Distance | c-statistic |
|---------------|-----------------------------|-------------|
| PS Decile #1  | 0.173                       | -           |
| PS Decile #2  | 0.181                       | -           |
| PS Decile #3  | 0.145                       | -           |
| PS Decile #4  | 0.143                       | -           |
| PS Decile #5  | 0.123                       | -           |
| PS Decile #6  | 0.091                       | -           |
| PS Decile #7  | 0.092                       | 0.641       |
| PS Decile #8  | 0.071                       | -           |
| PS Decile #9  | 0.038                       | 0.613       |
| PS Decile #10 | 0.081                       | 0.687       |

**Table 23:** C-statistics and absolute standardized confounder differences as measured within the 10 deciles of the stratified propensity score.

| Variable                          | Odds Ratio                | p      |
|-----------------------------------|---------------------------|--------|
| Year of Cohort Entry Date/2006    | 1.77 (1.69, 1.86)         | < 0.01 |
| Year of Cohort Entry Date/2007    | 1.39 (1.32, 1.46)         | < 0.01 |
| Age category/Age 0 - 34           | 0.59 (0.55, 0.64)         | < 0.01 |
| Age category/Age 35 - 44          | 1.16 (1.10, 1.22)         | < 0.01 |
| Age category/Age 45 - 54          | 1.20 (1.16, 1.26)         | < 0.01 |
| Age category/Age 65+              | 0.47 (0.44, 0.50)         | < 0.01 |
| Gender/Female                     | 1.19 (1.15, 1.23)         | < 0.01 |
| Gender/Unknown                    | 0.70 (0.15, 3.33)         | 0.66   |
| Region/Northeast                  | 2.05 (0.84, 5.00)         | 0.11   |
| Region/Midwest                    | 2.38 (0.98, 5.78)         | 0.06   |
| Region/South                      | 2.58 (1.06, 6.28)         | 0.04   |
| Region/West                       | 2.49 (1.02, 6.06)         | 0.04   |
| Neuropathy                        | 2.57 (2.41, 2.74)         | < 0.01 |
| Retinopathy                       | 3.11 (2.87, 3.37)         | < 0.01 |
| Hypertension                      | 0.93 (0.89, 0.98)         | < 0.01 |
| Hyperlipidemia                    | 1.74 (1.67, 1.82)         | < 0.01 |
| History of ischemic heart disease | 0.81 (0.76, 0.86)         | < 0.01 |
| MI history                        | 0.69 (0.60, 0.79)         | < 0.01 |
| History of CHF                    | 0.67 (0.61, 0.75)         | < 0.01 |
| Stroke                            | 0.79 (0.71, 0.88)         | < 0.01 |
| Alcohol use/abuse                 | 0.65 (0.50, 0.84)         | < 0.01 |
| Smoking                           | 0.50 (0.45, 0.55)         | < 0.01 |
| Overweight/obesity                | 1.76 (1.68, 1.85)         | < 0.01 |
| Cholelithiasis                    | 0.00 (< 0.001, > 999.999) | 0.91   |
| Cholecystitis                     | 0.86 (0.58, 1.28)         | 0.46   |
| Class I drugs                     | 0.50 (0.48, 0.52)         | < 0.01 |
| Class II drugs                    | 0.62 (0.60, 0.65)         | < 0.01 |
| Use of fibrates                   | 1.22 (1.15, 1.29)         | < 0.01 |
| Use of statins                    | 1.63 (1.56, 1.70)         | < 0.01 |
| Use of ACE inhibitor              | 1.86 (1.79, 1.94)         | < 0.01 |
| Use of ARB                        | 1.90 (1.81, 1.98)         | < 0.01 |
| Use of antipsychotic              | 0.42 (0.36, 0.49)         | < 0.01 |
| Use of sedative                   | 0.51 (0.48, 0.53)         | < 0.01 |
| Use of NSAID                      | 0.62 (0.59, 0.65)         | < 0.01 |
| Use of acid suppressing drugs     | 0.51 (0.48, 0.53)         | < 0.01 |
| Total cost                        | 1.00 (1.00, 1.00)         | < 0.01 |
| Use of any drug -- generic name   | 1.33 (1.32, 1.33)         | < 0.01 |
| Ambulatory visit                  | 0.96 (0.96, 0.97)         | < 0.01 |
| Prior cholecystectomy             | 1.32 (0.85, 2.06)         | 0.21   |



|                                                |                   |        |
|------------------------------------------------|-------------------|--------|
| Endoscopic retrograde cholangiopancreatography | 0.72 (0.28, 1.85) | 0.49   |
| Renal impairment or dialysis                   | 0.72 (0.64, 0.81) | < 0.01 |

**Table 24:** Propensity score model estimated by logistic regression

---

## STROBE CHECKLIST

The following checklist summarizes The Strengthening the Reporting of Observational Studies in Epidemiology (STROBE) elements and where those elements can be found in this report.<sup>2,26</sup>

| Item | Heading            | Summary of STROBE Recommendation                             | Section(s)                                  |
|------|--------------------|--------------------------------------------------------------|---------------------------------------------|
| 1a   | Title and Abstract | Indicate study design                                        | Title of Report                             |
| 1b   |                    | Provide informative abstract                                 | n/a                                         |
| 2    | Background         | Explain background and rationale                             | <a href="#">Link</a>                        |
| 3    |                    | State objectives and hypotheses                              | -                                           |
| 4    | Study Design       | Present key elements early                                   | <a href="#">Link</a>                        |
| 5    | Setting            | Describe setting                                             | <a href="#">Link</a> , <a href="#">Link</a> |
| 6a   | Cohort Study       | Eligibility criteria, follow-up                              | <a href="#">Link</a> , <a href="#">Link</a> |
| 6b   |                    | Matching criteria and number matched                         | <a href="#">Link</a>                        |
| 7    | Variables          | Define all variables                                         | <a href="#">Link</a> , <a href="#">Link</a> |
| 8    | Measurement        | Define measurement of each variable                          | <a href="#">Link</a>                        |
| 9    | Bias               | Define methods to mitigate bias                              | <a href="#">Link</a> , <a href="#">Link</a> |
| 10   | Study size         | Explain study size                                           | <a href="#">Link</a>                        |
| 11   | Quant. Variables   | Explain quantitative variables                               | <a href="#">Link</a>                        |
| 12a  | Stat. Methods      | Describe statistical methods                                 | <a href="#">Link</a>                        |
| 12b  |                    | Describe subgroup analyses                                   | <a href="#">Link</a>                        |
| 12c  |                    | Explain handling of missing data                             | <a href="#">Link</a>                        |
| 12d  |                    | Explain handling of loss to follow-up                        | <a href="#">Link</a>                        |
| 12e  |                    | Describe sensitivity analyses                                | <a href="#">Link</a>                        |
| 13a  | Participants       | Report number of patients at each stage                      | <a href="#">Link</a>                        |
| 13b  |                    | Give reason for exclusion                                    | <a href="#">Link</a>                        |
| 13c  |                    | Flow diagram                                                 | <a href="#">Link</a>                        |
| 14a  | Descriptive data   | Give characteristics of patients                             | <a href="#">Link</a>                        |
| 14b  |                    | Indicate missing data                                        | <a href="#">Link</a>                        |
| 14c  |                    | Summarize follow-up time                                     | <a href="#">Link</a>                        |
| 15   | Outcome data       | Report number of outcome events                              | <a href="#">Link</a>                        |
| 16a  | Main results       | Report the numbers of individuals at each stage of the study | <a href="#">Link</a>                        |

|     |                |                                                                                                      |                      |
|-----|----------------|------------------------------------------------------------------------------------------------------|----------------------|
| 16b |                | Give reasons for non-participation at each stage                                                     | <a href="#">Link</a> |
| 16c |                | Consider use of a flow diagram                                                                       | <a href="#">Link</a> |
| 17  | Other analyses | Report other analyses done, such as analyses of subgroups and interactions, and sensitivity analyses | <a href="#">Link</a> |
| 18  | Discussion     | Key results                                                                                          | -                    |
| 19  |                | Discuss limitations of the study                                                                     | -                    |
| 20  |                | Give a cautious overall interpretation of results                                                    | -                    |
| 21  |                | Discuss the generalisability (external validity) of the study results                                | -                    |
| 22  | Funding        | Give the source of funding and the role of the funders for the present study                         | -                    |

---

## APPENDIX: VARIABLE DEFINITIONS

### Exposure Group Definitions

#### *Use of other hypoglycemic agent*

New users of **Use of other hypoglycemic agent** with a washout period of 273 days.

#### *Use of Byetta*

New users of **Use of Byetta** with a washout period of 273 days.

### Exclusion Criteria Definitions

#### *Pancreatic disease*

**Pancreatic disease** measured over the time period beginning 273 days prior to the cohort entry date, and ending one day prior to the cohort entry date. The aggregation used is to set to true if this event ever occurred.

### Basic Baseline Covariate Definitions

#### *Age category*

**Age category** measured over the default covariate assessment period. The aggregation used is to take the last value in the time period. Missing data will be handled for this covariate using complete case.

#### *Gender*

**Gender** measured over the default covariate assessment period. The aggregation used is to take the last value in the time period. Missing data will be handled for this covariate using complete case.

### Other Baseline Covariate Definitions

#### *Region*

**Region** measured over the default covariate assessment period. The aggregation used is to take the last value in the time period. Missing data will be handled for this covariate using complete case.

### *Neuropathy*

**Neuropathy** measured over the default covariate assessment period. The aggregation used is to set to true if this event ever occurred. Missing data will be handled for this covariate using complete case.

### *Retinopathy*

**Retinopathy** measured over the default covariate assessment period. The aggregation used is to set to true if this event ever occurred. Missing data will be handled for this covariate using complete case.

### *Hypertension*

**Hypertension** measured over the default covariate assessment period. The aggregation used is to set to true if this event ever occurred. Missing data will be handled for this covariate using complete case.

### *Hyperlipidemia*

**Hyperlipidemia** measured over the default covariate assessment period. The aggregation used is to set to true if this event ever occurred. Missing data will be handled for this covariate using complete case.

### *History of ischemic heart disease*

**History of ischemic heart disease** measured over the default covariate assessment period. The aggregation used is to set to true if this event ever occurred. Missing data will be handled for this covariate using complete case.

### *MI history*

**MI history** measured over the default covariate assessment period. The aggregation used is to set to true if this event ever occurred. Missing data will be handled for this covariate using complete case.

### *History of CHF*

**History of CHF** measured over the default covariate assessment period. The aggregation used is to set to true if this event ever occurred. Missing data will be handled for this covariate using complete case.

### *Stroke*

**Stroke** measured over the default covariate assessment period. The aggregation used is to set to true if this event ever occurred. Missing data will be handled for this covariate using complete case.

### *Alcohol use/abuse*

**Alcohol use/abuse** measured over the default covariate assessment period. The aggregation used is to set to true if this event ever occurred. Missing data will be handled for this covariate using complete case.

### *Smoking*

**Smoking** measured over the default covariate assessment period. The aggregation used is to set to true if this event ever occurred. Missing data will be handled for this covariate using complete case.

### *Overweight/obesity*

**Overweight/obesity** measured over the default covariate assessment period. The aggregation used is to set to true if this event ever occurred. Missing data will be handled for this covariate using complete case.

### *Cholelithiasis*

**Cholelithiasis** measured over the default covariate assessment period. The aggregation used is to set to true if this event ever occurred. Missing data will be handled for this covariate using complete case.

### *Cholecystitis*

**Cholecystitis** measured over the default covariate assessment period. The aggregation used is to set to true if this event ever occurred. Missing data will be handled for this covariate using complete case.

### *Class I drugs*

**Class I drugs** measured over the default covariate assessment period. The aggregation used is to set to true if this event ever occurred. Missing data will be handled for this covariate using complete case.

### *Class II drugs*

**Class II drugs** measured over the default covariate assessment period. The aggregation used is to set to true if this event ever occurred. Missing data will be handled for this covariate using complete case.

### *Use of fibrates*

**Use of fibrates** measured over the default covariate assessment period. The aggregation used is to set to true if this event ever occurred. Missing data will be handled for this covariate using complete case.

### *Use of statins*

**Use of statins** measured over the default covariate assessment period. The aggregation used is to set to true if this event ever occurred. Missing data will be handled for this covariate using complete case.

### *Use of ACE inhibitor*

**Use of ACE inhibitor** measured over the default covariate assessment period. The aggregation used is to set to true if this event ever occurred. Missing data will be handled for this covariate using complete case.

### *Use of ARB*

**Use of ARB** measured over the default covariate assessment period. The aggregation used is to set to true if this event ever occurred. Missing data will be handled for this covariate using complete case.

### *Use of antipsychotic*

**Use of antipsychotic** measured over the default covariate assessment period. The aggregation used is to set to true if this event ever occurred. Missing data will be handled for this covariate using complete case.

### *Use of sedative*

**Use of sedative** measured over the default covariate assessment period. The aggregation used is to set to true if this event ever occurred. Missing data will be handled for this covariate using complete case.

### *Use of NSAID*

**Use of NSAID** measured over the default covariate assessment period. The aggregation used is to set to true if this event ever occurred. Missing data will be handled for this covariate using complete case.

### *Use of acid suppressing drugs*

**Use of acid suppressing drugs** measured over the default covariate assessment period. The aggregation used is to set to true if this event ever occurred. Missing data will be handled for this covariate using complete case.

### *Total cost*

**Total cost** measured over the default covariate assessment period. The aggregation used is to take the sum of over the time period. Missing data will be handled for this covariate using complete case.



### *Use of any drug -- generic name*

**Use of any drug -- generic name** measured over the default covariate assessment period. The aggregation used is to count the number of unique values in the time period. Missing data will be handled for this covariate using complete case.

### *Ambulatory visit*

**Ambulatory visit** measured over the default covariate assessment period. The aggregation used is to count the number of events that occurred. Missing data will be handled for this covariate using complete case.

### *Prior cholecystectomy*

**Prior cholecystectomy** measured over the default covariate assessment period. The aggregation used is to set to true if this event started. Missing data will be handled for this covariate using complete case.

### *Endoscopic retrograde cholangiopancreatography*

**Endoscopic retrograde cholangiopancreatography** measured over the default covariate assessment period. The aggregation used is to set to true if this event started. Missing data will be handled for this covariate using complete case.

### *Renal impairment or dialysis*

**Renal impairment or dialysis** measured over the default covariate assessment period. The aggregation used is to set to true if this event started. Missing data will be handled for this covariate using complete case.

## **Outcome Definitions**

Outcomes were:

### *Acute pancreatitis (primary dx)*

**Acute pancreatitis (primary dx)** measured over the time period beginning on the start of the follow-up period, and ending on the end of the follow-up period. The aggregation used is to set to true if this event started.

## **Measure Definitions**

### *Endoscopic retrograde cholangiopancreatography*

This event measure was defined as occurring when any of the following criteria were met:

- The occurrence of **Medical Services** with the following attributes:
  - **ICD-9 Procedure Code (any position)** is any of: { 51.10 }

- 51.10 - ENDOSCOPIC RETROGRADE CHOLANGIOPANCREATOGRAPHY [ERCP]
- The occurrence of **Inpatient Confinement** with the following attributes:
  - **ICD-9 Procedure Code (any position)** is any of: { 51.10 }
    - 51.10 - ENDOSCOPIC RETROGRADE CHOLANGIOPANCREATOGRAPHY [ERCP]
- The occurrence of **Medical Services** with the following attributes:
  - **HCPCS/PROC\_CD Procedure Code** is any of: { 43260, 43261, 43262, 43263, 43264, 43265, 43267, 43268, 43269, 43271, 43272 }

- 43260 - Endoscopic retrograde cholangio-pancreatography (ERCP); diagnostic, with or without collection of specimen(s) by brushing or washing (separate procedure) / Endoscopic retrograde cholangiopancreatography (ERCP); diagnostic, including collection of specimen(s) by brushing or washing, when performed (separate procedure) / Endoscopic retrograde cholangiopancreatography (ERCP); diagnostic, with or without collection of specimen(s) by brushing or washing (separate procedure)
- 43261 - Endoscopic retrograde cholangio-pancreatography (ERCP); with biopsy, single or multiple / Endoscopic retrograde cholangiopancreatography (ERCP); with biopsy, single or multiple
- 43262 - Endoscopic retrograde cholangio-pancreatography (ERCP); with sphincterotomy/papillotomy / Endoscopic retrograde cholangiopancreatography (ERCP); with sphincterotomy/papillotomy
- 43263 - Endoscopic retrograde cholangio-pancreatography (ERCP); with pressure measurement of sphincter of Oddi (pancreatic duct or common bile duct) / Endoscopic retrograde cholangiopancreatography (ERCP); with pressure measurement of sphincter of Oddi / Endoscopic retrograde cholangiopancreatography (ERCP); with pressure measurement of sphincter of Oddi (pancreatic duct or common bile duct)
- 43264 - Endoscopic retrograde cholangio-pancreatography (ERCP); with endoscopic retrograde removal of stone(s) from biliary and/or pancreatic ducts / Endoscopic retrograde cholangiopancreatography (ERCP); with endoscopic retrograde removal of calculus/calculi from biliary and/or pancreatic ducts / Endoscopic retrograde cholangiopancreatography (ERCP); with removal of calculi/debris from biliary/pancreatic duct(s)
- 43265 - Endoscopic retrograde cholangio-pancreatography (ERCP); with endoscopic retrograde destruction, lithotripsy of stone(s), any method / Endoscopic retrograde cholangiopancreatography (ERCP); with destruction of calculi, any method (eg, mechanical, electrohydraulic, lithotripsy) / Endoscopic retrograde cholangiopancreatography (ERCP); with endoscopic retrograde destruction, lithotripsy of calculus/calculi, any method
- 43267 - Endoscopic retrograde cholangio-pancreatography (ERCP); with endoscopic retrograde insertion of nasobiliary or nasopancreatic drainage tube / Endoscopic retrograde cholangiopancreatography (ERCP); with endoscopic retrograde insertion of nasobiliary or nasopancreatic drainage tube
- 43268 - Endoscopic retrograde cholangio-pancreatography (ERCP); with endoscopic retrograde insertion of tube or stent into bile or pancreatic duct / Endoscopic retrograde cholangiopancreatography (ERCP); with endoscopic retrograde insertion of tube or stent into bile or pancreatic duct
- 43269 - Endoscopic retrograde cholangio-pancreatography (ERCP); with endoscopic retrograde removal of foreign body and/or change of tube or stent / Endoscopic retrograde cholangiopancreatography (ERCP); with endoscopic retrograde removal of foreign body and/or change of tube or stent
- 43271 - Endoscopic retrograde cholangio-pancreatography (ERCP); with endoscopic retrograde balloon dilation of ampulla, biliary and/or pancreatic duct(s) / Endoscopic retrograde cholangiopancreatography (ERCP); with endoscopic retrograde balloon dilation of ampulla, biliary and/or pancreatic duct(s)

- 43272 - Endoscopic retrograde cholangio-pancreatography (ERCP); with ablation of tumor(s), polyp(s), or other lesion(s) not amenable to removal by hot biopsy forceps, bipolar cautery or snare technique / Endoscopic retrograde cholangiopancreatography (ERCP); with ablation of tumor(s), polyp(s), or other lesion(s) not amenable to removal by hot biopsy forceps, bipolar cautery or snare technique

### *MI history*

This event measure was defined as occurring when any of the following criteria were met:

- The occurrence of **Inpatient Confinement** with the following attributes:
  - **ICD-9 Diagnosis Code (any position)** is any of: { 410, 410.0, 410.00, 410.01, 410.02, 410.1, 410.10, 410.11, 410.12, 410.2, 410.20, 410.21, 410.22, 410.3, 410.30, 410.31, 410.32, 410.4, 410.40, 410.41, 410.42, 410.5, 410.50, 410.51, 410.52, 410.6, 410.60, 410.61, 410.62, 410.7, 410.70, 410.71, 410.72, 410.8, 410.80, 410.81, 410.82, 410.9, 410.90, 410.91, 410.92, 412 }

- 410 - ACUTE MYOCARDIAL INFARCTION
- 410.0 - ACUTE MYOCARDIAL INFARCTION OF ANTEROLATERAL WALL
- 410.00 - ACUTE MYOCARDIAL INFARCTION OF ANTEROLATERAL WALL EPISODE OF CARE UNSPECIFIED
- 410.01 - ACUTE MYOCARDIAL INFARCTION OF ANTEROLATERAL WALL INITIAL EPISODE OF CARE
- 410.02 - ACUTE MYOCARDIAL INFARCTION OF ANTEROLATERAL WALL SUBSEQUENT EPISODE OF CARE
- 410.1 - ACUTE MYOCARDIAL INFARCTION OF OTHER ANTERIOR WALL
- 410.10 - ACUTE MYOCARDIAL INFARCTION OF OTHER ANTERIOR WALL EPISODE OF CARE UNSPECIFIED
- 410.11 - ACUTE MYOCARDIAL INFARCTION OF OTHER ANTERIOR WALL INITIAL EPISODE OF CARE
- 410.12 - ACUTE MYOCARDIAL INFARCTION OF OTHER ANTERIOR WALL SUBSEQUENT EPISODE OF CARE
- 410.2 - ACUTE MYOCARDIAL INFARCTION OF INFEROLATERAL WALL
- 410.20 - ACUTE MYOCARDIAL INFARCTION OF INFEROLATERAL WALL EPISODE OF CARE UNSPECIFIED
- 410.21 - ACUTE MYOCARDIAL INFARCTION OF INFEROLATERAL WALL INITIAL EPISODE OF CARE
- 410.22 - ACUTE MYOCARDIAL INFARCTION OF INFEROLATERAL WALL SUBSEQUENT EPISODE OF CARE
- 410.3 - ACUTE MYOCARDIAL INFARCTION OF INFEROPOSTERIOR WALL
- 410.30 - ACUTE MYOCARDIAL INFARCTION OF INFEROPOSTERIOR WALL EPISODE OF CARE UNSPECIFIED
- 410.31 - ACUTE MYOCARDIAL INFARCTION OF INFEROPOSTERIOR WALL INITIAL EPISODE OF CARE
- 410.32 - ACUTE MYOCARDIAL INFARCTION OF INFEROPOSTERIOR WALL SUBSEQUENT EPISODE OF CARE
- 410.4 - ACUTE MYOCARDIAL INFARCTION OF OTHER INFERIOR WALL
- 410.40 - ACUTE MYOCARDIAL INFARCTION OF OTHER INFERIOR WALL EPISODE OF CARE UNSPECIFIED
- 410.41 - ACUTE MYOCARDIAL INFARCTION OF OTHER INFERIOR WALL INITIAL EPISODE OF CARE
- 410.42 - ACUTE MYOCARDIAL INFARCTION OF OTHER INFERIOR WALL SUBSEQUENT EPISODE OF CARE
- 410.5 - ACUTE MYOCARDIAL INFARCTION OF OTHER LATERAL WALL
- 410.50 - ACUTE MYOCARDIAL INFARCTION OF OTHER LATERAL WALL EPISODE OF CARE UNSPECIFIED
- 410.51 - ACUTE MYOCARDIAL INFARCTION OF OTHER LATERAL WALL INITIAL EPISODE OF CARE
- 410.52 - ACUTE MYOCARDIAL INFARCTION OF OTHER LATERAL WALL SUBSEQUENT EPISODE OF CARE
- 410.6 - TRUE POSTERIOR WALL INFARCTION
- 410.60 - TRUE POSTERIOR WALL INFARCTION EPISODE OF CARE UNSPECIFIED
- 410.61 - TRUE POSTERIOR WALL INFARCTION INITIAL EPISODE OF CARE
- 410.62 - TRUE POSTERIOR WALL INFARCTION SUBSEQUENT EPISODE OF CARE
- 410.7 - SUBENDOCARDIAL INFARCTION

- 410.70 - SUBENDOCARDIAL INFARCTION EPISODE OF CARE UNSPECIFIED
  - 410.71 - SUBENDOCARDIAL INFARCTION INITIAL EPISODE OF CARE
  - 410.72 - SUBENDOCARDIAL INFARCTION SUBSEQUENT EPISODE OF CARE
  - 410.8 - ACUTE MYOCARDIAL INFARCTION OF OTHER SPECIFIED SITES
  - 410.80 - ACUTE MYOCARDIAL INFARCTION OF OTHER SPECIFIED SITES EPISODE OF CARE UNSPECIFIED
  - 410.81 - ACUTE MYOCARDIAL INFARCTION OF OTHER SPECIFIED SITES INITIAL EPISODE OF CARE
  - 410.82 - ACUTE MYOCARDIAL INFARCTION OF OTHER SPECIFIED SITES SUBSEQUENT EPISODE OF CARE
  - 410.9 - ACUTE MYOCARDIAL INFARCTION OF UNSPECIFIED SITE
  - 410.90 - ACUTE MYOCARDIAL INFARCTION OF UNSPECIFIED SITE EPISODE OF CARE UNSPECIFIED
  - 410.91 - ACUTE MYOCARDIAL INFARCTION OF UNSPECIFIED SITE INITIAL EPISODE OF CARE
  - 410.92 - ACUTE MYOCARDIAL INFARCTION OF UNSPECIFIED SITE SUBSEQUENT EPISODE OF CARE
  - 412 - OLD MYOCARDIAL INFARCTION
- The occurrence of **Medical Services** with the following attributes:
    - **ICD-9 Diagnosis Code (any position)** is any of: { 410, 410.0, 410.00, 410.01, 410.02, 410.1, 410.10, 410.11, 410.12, 410.2, 410.20, 410.21, 410.22, 410.3, 410.30, 410.31, 410.32, 410.4, 410.40, 410.41, 410.42, 410.5, 410.50, 410.51, 410.52, 410.6, 410.60, 410.61, 410.62, 410.7, 410.70, 410.71, 410.72, 410.8, 410.80, 410.81, 410.82, 410.9, 410.90, 410.91, 410.92, 412 }

- 410 - ACUTE MYOCARDIAL INFARCTION
- 410.0 - ACUTE MYOCARDIAL INFARCTION OF ANTEROLATERAL WALL
- 410.00 - ACUTE MYOCARDIAL INFARCTION OF ANTEROLATERAL WALL EPISODE OF CARE UNSPECIFIED
- 410.01 - ACUTE MYOCARDIAL INFARCTION OF ANTEROLATERAL WALL INITIAL EPISODE OF CARE
- 410.02 - ACUTE MYOCARDIAL INFARCTION OF ANTEROLATERAL WALL SUBSEQUENT EPISODE OF CARE
- 410.1 - ACUTE MYOCARDIAL INFARCTION OF OTHER ANTERIOR WALL
- 410.10 - ACUTE MYOCARDIAL INFARCTION OF OTHER ANTERIOR WALL EPISODE OF CARE UNSPECIFIED
- 410.11 - ACUTE MYOCARDIAL INFARCTION OF OTHER ANTERIOR WALL INITIAL EPISODE OF CARE
- 410.12 - ACUTE MYOCARDIAL INFARCTION OF OTHER ANTERIOR WALL SUBSEQUENT EPISODE OF CARE
- 410.2 - ACUTE MYOCARDIAL INFARCTION OF INFEROLATERAL WALL
- 410.20 - ACUTE MYOCARDIAL INFARCTION OF INFEROLATERAL WALL EPISODE OF CARE UNSPECIFIED
- 410.21 - ACUTE MYOCARDIAL INFARCTION OF INFEROLATERAL WALL INITIAL EPISODE OF CARE
- 410.22 - ACUTE MYOCARDIAL INFARCTION OF INFEROLATERAL WALL SUBSEQUENT EPISODE OF CARE
- 410.3 - ACUTE MYOCARDIAL INFARCTION OF INFEROPOSTERIOR WALL
- 410.30 - ACUTE MYOCARDIAL INFARCTION OF INFEROPOSTERIOR WALL EPISODE OF CARE UNSPECIFIED
- 410.31 - ACUTE MYOCARDIAL INFARCTION OF INFEROPOSTERIOR WALL INITIAL EPISODE OF CARE
- 410.32 - ACUTE MYOCARDIAL INFARCTION OF INFEROPOSTERIOR WALL SUBSEQUENT EPISODE OF CARE
- 410.4 - ACUTE MYOCARDIAL INFARCTION OF OTHER INFERIOR WALL
- 410.40 - ACUTE MYOCARDIAL INFARCTION OF OTHER INFERIOR WALL EPISODE OF CARE UNSPECIFIED
- 410.41 - ACUTE MYOCARDIAL INFARCTION OF OTHER INFERIOR WALL INITIAL EPISODE OF CARE
- 410.42 - ACUTE MYOCARDIAL INFARCTION OF OTHER INFERIOR WALL SUBSEQUENT EPISODE OF CARE
- 410.5 - ACUTE MYOCARDIAL INFARCTION OF OTHER LATERAL WALL
- 410.50 - ACUTE MYOCARDIAL INFARCTION OF OTHER LATERAL WALL EPISODE OF CARE UNSPECIFIED
- 410.51 - ACUTE MYOCARDIAL INFARCTION OF OTHER LATERAL WALL INITIAL EPISODE OF CARE
- 410.52 - ACUTE MYOCARDIAL INFARCTION OF OTHER LATERAL WALL SUBSEQUENT EPISODE OF CARE
- 410.6 - TRUE POSTERIOR WALL INFARCTION
- 410.60 - TRUE POSTERIOR WALL INFARCTION EPISODE OF CARE UNSPECIFIED
- 410.61 - TRUE POSTERIOR WALL INFARCTION INITIAL EPISODE OF CARE
- 410.62 - TRUE POSTERIOR WALL INFARCTION SUBSEQUENT EPISODE OF CARE
- 410.7 - SUBENDOCARDIAL INFARCTION

- 410.70 - SUBENDOCARDIAL INFARCTION EPISODE OF CARE UNSPECIFIED
- 410.71 - SUBENDOCARDIAL INFARCTION INITIAL EPISODE OF CARE
- 410.72 - SUBENDOCARDIAL INFARCTION SUBSEQUENT EPISODE OF CARE
- 410.8 - ACUTE MYOCARDIAL INFARCTION OF OTHER SPECIFIED SITES
- 410.80 - ACUTE MYOCARDIAL INFARCTION OF OTHER SPECIFIED SITES EPISODE OF CARE UNSPECIFIED
- 410.81 - ACUTE MYOCARDIAL INFARCTION OF OTHER SPECIFIED SITES INITIAL EPISODE OF CARE
- 410.82 - ACUTE MYOCARDIAL INFARCTION OF OTHER SPECIFIED SITES SUBSEQUENT EPISODE OF CARE
- 410.9 - ACUTE MYOCARDIAL INFARCTION OF UNSPECIFIED SITE
- 410.90 - ACUTE MYOCARDIAL INFARCTION OF UNSPECIFIED SITE EPISODE OF CARE UNSPECIFIED
- 410.91 - ACUTE MYOCARDIAL INFARCTION OF UNSPECIFIED SITE INITIAL EPISODE OF CARE
- 410.92 - ACUTE MYOCARDIAL INFARCTION OF UNSPECIFIED SITE SUBSEQUENT EPISODE OF CARE
- 412 - OLD MYOCARDIAL INFARCTION

### *Overweight/obesity*

This event measure was defined as occurring when any of the following criteria were met:

- The occurrence of **Medical Services** with the following attributes:
  - **ICD-9 Diagnosis Code (any position)** is any of: { 278.0, 278.00, 278.01, 278.02, 278.03 }
    - 278.0 - OVERWEIGHT AND OBESITY
    - 278.00 - OBESITY UNSPECIFIED
    - 278.01 - MORBID OBESITY
    - 278.02 - OVERWEIGHT
    - 278.03 - OBESITY HYPOVENTILATION SYNDROME
- The occurrence of **Inpatient Confinement** with the following attributes:
  - **ICD-9 Diagnosis Code (any position)** is any of: { 278.0, 278.00, 278.01, 278.02, 278.03 }
    - 278.0 - OVERWEIGHT AND OBESITY
    - 278.00 - OBESITY UNSPECIFIED
    - 278.01 - MORBID OBESITY
    - 278.02 - OVERWEIGHT
    - 278.03 - OBESITY HYPOVENTILATION SYNDROME

### *Prior cholecystectomy*

This event measure was defined as occurring when any of the following criteria were met:

- The occurrence of **Inpatient Confinement** with the following attributes:



- **ICD-9 Procedure Code (any position)** is any of: { 51.2, 51.21, 51.22, 51.23, 51.24, 51.0 }
  - 51.2 - CHOLECYSTECTOMY
  - 51.21 - OTHER PARTIAL CHOLECYSTECTOMY
  - 51.22 - CHOLECYSTECTOMY
  - 51.23 - LAPAROSCOPIC CHOLECYSTECTOMY
  - 51.24 - LAPAROSCOPIC PARTIAL CHOLECYSTECTOMY
  - 51.0 - CHOLECYSTOTOMY AND CHOLECYSTOSTOMY
- The occurrence of **Medical Services** with the following attributes:
  - **ICD-9 Procedure Code (any position)** is any of: { 51.2, 51.21, 51.22, 51.23, 51.24, 51.0 }
    - 51.2 - CHOLECYSTECTOMY
    - 51.21 - OTHER PARTIAL CHOLECYSTECTOMY
    - 51.22 - CHOLECYSTECTOMY
    - 51.23 - LAPAROSCOPIC CHOLECYSTECTOMY
    - 51.24 - LAPAROSCOPIC PARTIAL CHOLECYSTECTOMY
    - 51.0 - CHOLECYSTOTOMY AND CHOLECYSTOSTOMY
- The occurrence of **Inpatient Confinement** with the following attributes:
  - **ICD-9 Diagnosis Code (any position)** is any of: { 576.0, 997.41 }
    - 576.0 - POSTCHOLECYSTECTOMY SYNDROME
    - 997.41 - RETAINED CHOLELITHIASIS FOLLOWING CHOLECYSTECTOMY
- The occurrence of **Medical Services** with the following attributes:
  - **ICD-9 Diagnosis Code (any position)** is any of: { 576.0, 997.41 }
    - 576.0 - POSTCHOLECYSTECTOMY SYNDROME
    - 997.41 - RETAINED CHOLELITHIASIS FOLLOWING CHOLECYSTECTOMY
- The occurrence of **Medical Services** with the following attributes:
  - **HCPCS/PROC\_CD Procedure Code** is any of: { 47480, 47490, 47562, 47563, 47564, 47600, 47605, 47610, 47612, 47620 }

- 47480 - Cholecystotomy or cholecystostomy with exploration, drainage, or removal of calculus (separate procedure) / Cholecystotomy or cholecystostomy, open, with exploration, drainage, or removal of calculus (separate procedure)
- 47490 - Cholecystostomy, percutaneous, complete procedure, including imaging guidance, catheter placement, cholecystogram when performed, and radiological supervision and interpretation / Percutaneous cholecystostomy
- 47562 - Laparoscopy, surgical; cholecystectomy
- 47563 - Laparoscopy, surgical; cholecystectomy with cholangiography
- 47564 - Laparoscopy, surgical; cholecystectomy with exploration of common duct
- 47600 - Cholecystectomy / Cholecystectomy;
- 47605 - Cholecystectomy; with cholangiography
- 47610 - Cholecystectomy with exploration of common duct / Cholecystectomy with exploration of common duct;
- 47612 - Cholecystectomy with exploration of common duct; with choledochoenterostomy
- 47620 - Cholecystectomy with exploration of common duct; with transduodenal sphincterotomy or sphincteroplasty, with or without cholangiography

### *Use of NSAID*

This event measure was defined as occurring when any of the following criteria were met:

- The occurrence of **Prescription Claims** with the following attributes:
  - **NDC Generic Name** is any of: { ASPIRIN, CELECOXIB, DICLOFENAC POTASSIUM, DICLOFENAC SODIUM, DIFLUNISAL, ETODOLAC, IBUPROFEN, INDOMETHACIN, KETOPROFEN, NABUMETONE, NAPROXEN, NAPROXEN SODIUM, OXAPROZIN, PIROXICAM, ROFECOXIB, SALSALATE, SULINDAC, TOLMETIN SODIUM, VALDECOXIB, DICLOFENAC EPOLAMINE, DICLOFENAC SUBMICRONIZED, INDOMETHACIN SODIUM, KETOPROFEN, MICRONIZED, NABUMETONE, MICRONIZED }

- ASPIRIN
- CELECOXIB
- DICLOFENAC POTASSIUM
- DICLOFENAC SODIUM
- DIFLUNISAL
- ETODOLAC
- IBUPROFEN
- INDOMETHACIN
- KETOPROFEN
- NABUMETONE
- NAPROXEN
- NAPROXEN SODIUM
- OXAPROZIN
- PIROXICAM
- ROFECOXIB
- SALSALATE
- SULINDAC
- TOLMETIN SODIUM
- VALDECOXIB
- DICLOFENAC EPOLAMINE
- DICLOFENAC SUBMICRONIZED
- INDOMETHACIN SODIUM
- KETOPROFEN, MICRONIZED
- NABUMETONE, MICRONIZED

*Use of any drug -- generic name*

This measure combines the values from the following attributes:

- **NDC Generic Name** in **Use of any drug**

*Use of other hypoglycemic agent*

This event measure was defined as occurring when any of the following criteria were met:

- The occurrence of **Prescription Claims** with the following attributes:
  - **NDC Generic Name** is any of: { ACARBOSE, CHLORPROPAMIDE, GLIMEPIRIDE, GLIPIZIDE, GLIPIZIDE/METFORMIN HCL, GLYBURIDE/METFORMIN HCL, LIRAGLUTIDE, METFORMIN HCL, METFORMIN/AMINO ACIDS COMB.#7/HERBAL COMB.#125/CHOLINE, METFORMIN/CAFFEINE/AMINO ACIDS#7/HERBAL COMB#125/CHOLINE BIT, MIGLITOL, NATEGLINIDE, PIOGLITAZONE HCL, PIOGLITAZONE HCL/GLIMEPIRIDE, PIOGLITAZONE HCL/METFORMIN HCL, PRAMLINTIDE ACETATE, REPAGLINIDE, REPAGLINIDE/METFORMIN HCL, ROSIGLITAZONE MALEATE, ROSIGLITAZONE MALEATE/GLIMEPIRIDE, ROSIGLITAZONE MALEATE/METFORMIN HCL, SITAGLIPTIN PHOSPHATE, SITAGLIPTIN PHOSPHATE/METFORMIN HCL, SITAGLIPTIN PHOSPHATE/SIMVASTATIN, TOLAZAMIDE, TOLBUTAMIDE, GLYBURIDE, GLYBURIDE,MICRONIZED,

INSULIN ASPART, INSULIN ASPART PROTAMINE HUMAN/INSULIN ASPART, INSULIN DETEMIR, INSULIN GLARGINE, HUMAN RECOMBINANT ANALOG, INSULIN GLULISINE, INSULIN ISOPHANE NPH,BF-PK, INSULIN ISOPHANE,BEEF, INSULIN ISOPHANE,BEEF PURE, INSULIN ISOPHANE,PORK PURE, INSULIN LISPRO, INSULIN LISPRO PROTAMINE & INSULIN LISPRO, INSULIN NPH HUMAN SEMI-SYN, INSULIN NPH HUMAN SEMI-SYN/INSULIN REG HUMAN SEMI-SYN, INSULIN PROTAMINE ZINC,BEEF, INSULIN PROTAMINE ZN,BEEF (P), INSULIN PROTAMINE ZN,BF-PK, INSULIN REG HUMAN SEMI-SYN, INSULIN REG, HUM S-S BUFF, INSULIN REGULAR, HUMAN, INSULIN REGULAR, HUMAN/INSULIN RELEASE UNIT, INSULIN REGULAR, HUMAN/INSULIN RELEASE UNIT/CHAMBER/INHALER, INSULIN REGULAR,BEEF-PORK, INSULIN REGULAR,HUMAN BUFFERED, INSULIN ZINC BEEF, INSULIN ZINC EXTEND HUMAN REC, INSULIN ZINC EXTENDED,BF-PK, INSULIN ZINC HUMAN REC, INSULIN ZINC HUMAN SEMI-SYN, INSULIN ZINC PROMPT,BF-PK, INSULIN ZINC,BEEF PURIFIED, INSULIN ZINC,BEEF PURIFIED/INSULIN ZINC,PORK PURIFIED, INSULIN ZINC,BEEF-PORK, INSULIN ZINC,PORK PURIFIED, INSULIN,BEEF, INSULIN,PORK, INSULIN,PORK PURIFIED, INSULIN,PORK PURIFIED/INSULIN ISOPHANE,PORK PURE, INSULIN,PORK REG. CONCENTRATE, NPH, HUMAN INSULIN ISOPHANE, NPH, HUMAN INSULIN ISOPHANE/INSULIN REGULAR, HUMAN }

- ACARBOSE
- CHLORPROPAMIDE
- GLIMEPIRIDE
- GLIPIZIDE
- GLIPIZIDE/METFORMIN HCL
- GLYBURIDE/METFORMIN HCL
- LIRAGLUTIDE
- METFORMIN HCL
- METFORMIN/AMINO ACIDS COMB. #7/HERBAL COMB.#125/CHOLINE
- METFORMIN/CAFFEINE/AMINO ACIDS#7/HERBAL COMB#125/CHOLINE BIT
- MIGLITOL
- NATEGLINIDE
- PIOGLITAZONE HCL
- PIOGLITAZONE HCL/GLIMEPIRIDE
- PIOGLITAZONE HCL/METFORMIN HCL
- PRAMLINTIDE ACETATE
- REPAGLINIDE
- REPAGLINIDE/METFORMIN HCL
- ROSIGLITAZONE MALEATE
- ROSIGLITAZONE MALEATE/GLIMEPIRIDE
- ROSIGLITAZONE MALEATE/METFORMIN HCL
- SITAGLIPTIN PHOSPHATE
- SITAGLIPTIN PHOSPHATE/METFORMIN HCL
- SITAGLIPTIN PHOSPHATE/SIMVASTATIN
- TOLAZAMIDE
- TOLBUTAMIDE
- GLYBURIDE
- GLYBURIDE,MICRONIZED
- INSULIN ASPART
- INSULIN ASPART PROTAMINE HUMAN/INSULIN ASPART
- INSULIN DETEMIR
- INSULIN GLARGINE, HUMAN RECOMBINANT ANALOG
- INSULIN GLULISINE
- INSULIN ISOPHANE NPH,BF-PK
- INSULIN ISOPHANE,BEEF
- INSULIN ISOPHANE,BEEF PURE
- INSULIN ISOPHANE,PORK PURE
- INSULIN LISPRO
- INSULIN LISPRO PROTAMINE & INSULIN LISPRO
- INSULIN NPH HUMAN SEMI-SYN
- INSULIN NPH HUMAN SEMI-SYN/INSULIN REG HUMAN SEMI-SYN
- INSULIN PROTAMINE ZINC,BEEF
- INSULIN PROTAMINE ZN,BEEF (P)
- INSULIN PROTAMINE ZN,BF-PK
- INSULIN REG HUMAN SEMI-SYN
- INSULIN REG, HUM S-S BUFF

- INSULIN REGULAR, HUMAN
- INSULIN REGULAR, HUMAN/INSULIN RELEASE UNIT
- INSULIN REGULAR, HUMAN/INSULIN RELEASE UNIT/CHAMBER/INHALER
- INSULIN REGULAR,BEEF-PORK
- INSULIN REGULAR,HUMAN BUFFERED
- INSULIN ZINC BEEF
- INSULIN ZINC EXTEND HUMAN REC
- INSULIN ZINC EXTENDED,BF-PK
- INSULIN ZINC HUMAN REC
- INSULIN ZINC HUMAN SEMI-SYN
- INSULIN ZINC PROMPT,BF-PK
- INSULIN ZINC,BEEF PURIFIED
- INSULIN ZINC,BEEF PURIFIED/INSULIN ZINC,PORK PURIFIED
- INSULIN ZINC,BEEF-PORK
- INSULIN ZINC,PORK PURIFIED
- INSULIN,BEEF
- INSULIN,PORK
- INSULIN,PORK PURIFIED
- INSULIN,PORK PURIFIED/INSULIN ISOPHANE,PORK PURE
- INSULIN,PORK REG. CONCENTRATE
- NPH, HUMAN INSULIN ISOPHANE
- NPH, HUMAN INSULIN ISOPHANE/INSULIN REGULAR, HUMAN

### *Acute pancreatitis (primary dx)*

This event measure was defined as occurring when any of the following criteria were met:

- The occurrence of **Inpatient Confinement** with the following attributes:
  - **Primary ICD-9 Diagnosis Code** is any of: { 577.0 }
    - 577.0 - ACUTE PANCREATITIS

### *Age category*

This measure categorizes **Age** into the following categories:

- **Age 0 - 34:** Up to 35.0 (exclusive).
- **Age 35 - 44:** From 35.0 (inclusive) to 45.0 (exclusive).
- **Age 45 - 54:** From 45.0 (inclusive) to 55.0 (exclusive).
- **Age 55 - 64:** From 55.0 (inclusive) to 65.0 (exclusive). *This is the referent category.*
- **Age 65+:** From 65.0 (inclusive) to (any).

### *Alcohol use/abuse*

This event measure was defined as occurring when any of the following criteria were met:

- The occurrence of **Inpatient Confinement** with the following attributes:

- **ICD-9 Diagnosis Code (any position)** is any of: { 303, 303.0, 303.00, 303.01, 303.02, 303.03, 303.9, 303.90, 303.91, 303.92, 303.93, 305.0, 305.00, 305.01, 305.02, 305.03, 357.5, 425.5, 535.3, 535.30, 535.31, 571.0, 571.1, 571.2, 571.3, V11.3 }
  - 303 - ALCOHOL DEPENDENCE SYNDROME
  - 303.0 - ACUTE ALCOHOLIC INTOXICATION
  - 303.00 - ACUTE ALCOHOLIC INTOXICATION IN ALCOHOLISM UNSPECIFIED DRINKING BEHAVIOR
  - 303.01 - ACUTE ALCOHOLIC INTOXICATION IN ALCOHOLISM CONTINUOUS DRINKING BEHAVIOR
  - 303.02 - ACUTE ALCOHOLIC INTOXICATION IN ALCOHOLISM EPISODIC DRINKING BEHAVIOR
  - 303.03 - ACUTE ALCOHOLIC INTOXICATION IN ALCOHOLISM IN REMISSION
  - 303.9 - OTHER AND UNSPECIFIED ALCOHOL DEPENDENCE
  - 303.90 - OTHER AND UNSPECIFIED ALCOHOL DEPENDENCE UNSPECIFIED DRINKING BEHAVIOR
  - 303.91 - OTHER AND UNSPECIFIED ALCOHOL DEPENDENCE CONTINUOUS DRINKING BEHAVIOR
  - 303.92 - OTHER AND UNSPECIFIED ALCOHOL DEPENDENCE EPISODIC DRINKING BEHAVIOR
  - 303.93 - OTHER AND UNSPECIFIED ALCOHOL DEPENDENCE IN REMISSION
  - 305.0 - NONDEPENDENT ALCOHOL ABUSE
  - 305.00 - NONDEPENDENT ALCOHOL ABUSE UNSPECIFIED DRINKING BEHAVIOR
  - 305.01 - NONDEPENDENT ALCOHOL ABUSE CONTINUOUS DRINKING BEHAVIOR
  - 305.02 - NONDEPENDENT ALCOHOL ABUSE EPISODIC DRINKING BEHAVIOR
  - 305.03 - NONDEPENDENT ALCOHOL ABUSE IN REMISSION
  - 357.5 - ALCOHOLIC POLYNEUROPATHY
  - 425.5 - ALCOHOLIC CARDIOMYOPATHY
  - 535.3 - ALCOHOLIC GASTRITIS
  - 535.30 - ALCOHOLIC GASTRITIS (WITHOUT HEMORRHAGE)
  - 535.31 - ALCOHOLIC GASTRITIS WITH HEMORRHAGE
  - 571.0 - ALCOHOLIC FATTY LIVER
  - 571.1 - ACUTE ALCOHOLIC HEPATITIS
  - 571.2 - ALCOHOLIC CIRRHOSIS OF LIVER
  - 571.3 - ALCOHOLIC LIVER DAMAGE UNSPECIFIED
  - V11.3 - PERSONAL HISTORY OF ALCOHOLISM
- The occurrence of **Medical Services** with the following attributes:
  - **ICD-9 Diagnosis Code (any position)** is any of: { 303, 303.0, 303.00, 303.01, 303.02, 303.03, 303.9, 303.90, 303.91, 303.92, 303.93, 305.0, 305.00, 305.01, 305.02, 305.03, 357.5, 425.5, 535.3, 535.30, 535.31, 571.0, 571.1, 571.2, 571.3, V11.3 }

- 303 - ALCOHOL DEPENDENCE SYNDROME
- 303.0 - ACUTE ALCOHOLIC INTOXICATION
- 303.00 - ACUTE ALCOHOLIC INTOXICATION IN ALCOHOLISM UNSPECIFIED DRINKING BEHAVIOR
- 303.01 - ACUTE ALCOHOLIC INTOXICATION IN ALCOHOLISM CONTINUOUS DRINKING BEHAVIOR
- 303.02 - ACUTE ALCOHOLIC INTOXICATION IN ALCOHOLISM EPISODIC DRINKING BEHAVIOR
- 303.03 - ACUTE ALCOHOLIC INTOXICATION IN ALCOHOLISM IN REMISSION
- 303.9 - OTHER AND UNSPECIFIED ALCOHOL DEPENDENCE
- 303.90 - OTHER AND UNSPECIFIED ALCOHOL DEPENDENCE UNSPECIFIED DRINKING BEHAVIOR
- 303.91 - OTHER AND UNSPECIFIED ALCOHOL DEPENDENCE CONTINUOUS DRINKING BEHAVIOR
- 303.92 - OTHER AND UNSPECIFIED ALCOHOL DEPENDENCE EPISODIC DRINKING BEHAVIOR
- 303.93 - OTHER AND UNSPECIFIED ALCOHOL DEPENDENCE IN REMISSION
- 305.0 - NONDEPENDENT ALCOHOL ABUSE
- 305.00 - NONDEPENDENT ALCOHOL ABUSE UNSPECIFIED DRINKING BEHAVIOR
- 305.01 - NONDEPENDENT ALCOHOL ABUSE CONTINUOUS DRINKING BEHAVIOR
- 305.02 - NONDEPENDENT ALCOHOL ABUSE EPISODIC DRINKING BEHAVIOR
- 305.03 - NONDEPENDENT ALCOHOL ABUSE IN REMISSION
- 357.5 - ALCOHOLIC POLYNEUROPATHY
- 425.5 - ALCOHOLIC CARDIOMYOPATHY
- 535.3 - ALCOHOLIC GASTRITIS
- 535.30 - ALCOHOLIC GASTRITIS (WITHOUT HEMORRHAGE)
- 535.31 - ALCOHOLIC GASTRITIS WITH HEMORRHAGE
- 571.0 - ALCOHOLIC FATTY LIVER
- 571.1 - ACUTE ALCOHOLIC HEPATITIS
- 571.2 - ALCOHOLIC CIRRHOSIS OF LIVER
- 571.3 - ALCOHOLIC LIVER DAMAGE UNSPECIFIED
- V11.3 - PERSONAL HISTORY OF ALCOHOLISM

### *Ambulatory visit*

This event measure was defined as occurring when any of the following criteria were met:

- The occurrence of **Medical Services** with the following attributes:
  - **HCPCS/PROC\_CD Procedure Code** is any of: { 90801, 90802, 90803, 90804, 90805, 90806, 90807, 90808, 90809, 90810, 90811, 90812, 90813, 90814, 90815, 90816, 90817, 90818, 90819, 90821, 90822, 90823, 90824, 90826, 90827, 90828, 90829, 90830, 90840, 90845, 90846, 90847, 90849, 90853, 90857, 90862, 90865, 90866, 90870, 90875, 90876, 90880, 90882, 90885, 90887, 90889, 90899, 99201, 99202, 99203, 99204, 99205, 99210, 99211, 99212, 99213, 99214, 99215, 99217, 99218, 99219, 99220, 99221, 99222, 99223, 99225, 99231, 99232, 99233, 99234, 99235, 99236, 99238, 99239, 99241, 99242, 99243, 99244, 99245, 99250, 99251, 99252, 99253, 99254, 99255,



99261, 99262, 99274, 99281, 99282, 99283, 99284, 99285, 99288, 99290,  
99291, 99292, 99296, 99300, 99301, 99303, 99304, 99305, 99306, 99307,  
99308, 99309, 99310, 99312, 99315, 99316, 99318, 99320, 99324, 99325,  
99326, 99327, 99328, 99331, 99332, 99333, 99334, 99335, 99336, 99337,  
99339, 99340, 99341, 99342, 99343, 99344, 99345, 99347, 99348, 99349,  
99350, 99354, 99355, 99356, 99357, 99358, 99359, 99360, 99361, 99363,  
99364, 99366, 99367, 99368, 99371, 99372, 99373, 99374, 99375, 99377,  
99378, 99379, 99380, 99381, 99382, 99383, 99384, 99385, 99386, 99387,  
99391, 99392, 99393, 99394, 99395, 99396, 99397, 99401, 99402, 99403,  
99404, 99406, 99407, 99408, 99409, 99411, 99412, 99420, 99429, 99431,  
99433, 99436, 99441, 99442, 99443, 99444, 99450, 99455, 99456, 99460,  
99462, 99463, 99464, 99471, 99472, 99475, 99476, 99478, 99479, 99480,  
99499 }

- 90801 - 90801
- 90802 - 90802
- 90803 - 90803
- 90804 - 90804
- 90805 - 90805
- 90806 - 90806
- 90807 - 90807
- 90808 - 90808
- 90809 - 90809
- 90810 - 90810
- 90811 - 90811
- 90812 - 90812
- 90813 - 90813
- 90814 - 90814
- 90815 - 90815
- 90816 - 90816
- 90817 - 90817
- 90818 - 90818
- 90819 - 90819
- 90821 - 90821
- 90822 - 90822
- 90823 - 90823
- 90824 - 90824
- 90826 - 90826
- 90827 - 90827
- 90828 - 90828
- 90829 - 90829
- 90830 - 90830
- 90840 - 90840
- 90845 - 90845
- 90846 - 90846
- 90847 - 90847
- 90849 - 90849
- 90853 - 90853
- 90857 - 90857
- 90862 - 90862
- 90865 - 90865
- 90866 - 90866
- 90870 - 90870
- 90875 - 90875
- 90876 - 90876
- 90880 - 90880
- 90882 - 90882
- 90885 - 90885
- 90887 - 90887
- 90889 - 90889

- 90899 - 90899
- 99201 - 99201
- 99202 - 99202
- 99203 - 99203
- 99204 - 99204
- 99205 - 99205
- 99210 - 99210
- 99211 - 99211
- 99212 - 99212
- 99213 - 99213
- 99214 - 99214
- 99215 - 99215
- 99217 - 99217
- 99218 - 99218
- 99219 - 99219
- 99220 - 99220
- 99221 - 99221
- 99222 - 99222
- 99223 - 99223
- 99225 - 99225
- 99231 - 99231
- 99232 - 99232
- 99233 - 99233
- 99234 - 99234
- 99235 - 99235
- 99236 - 99236
- 99238 - 99238
- 99239 - 99239
- 99241 - 99241
- 99242 - 99242
- 99243 - 99243
- 99244 - 99244
- 99245 - 99245
- 99250 - 99250
- 99251 - 99251
- 99252 - 99252
- 99253 - 99253
- 99254 - 99254
- 99255 - 99255
- 99261 - 99261
- 99262 - 99262
- 99274 - 99274
- 99281 - 99281
- 99282 - 99282
- 99283 - 99283
- 99284 - 99284

- 99285 - 99285
- 99288 - 99288
- 99290 - 99290
- 99291 - 99291
- 99292 - 99292
- 99296 - 99296
- 99300 - 99300
- 99301 - 99301
- 99303 - 99303
- 99304 - 99304
- 99305 - 99305
- 99306 - 99306
- 99307 - 99307
- 99308 - 99308
- 99309 - 99309
- 99310 - 99310
- 99312 - 99312
- 99315 - 99315
- 99316 - 99316
- 99318 - 99318
- 99320 - 99320
- 99324 - 99324
- 99325 - 99325
- 99326 - 99326
- 99327 - 99327
- 99328 - 99328
- 99331 - 99331
- 99332 - 99332
- 99333 - 99333
- 99334 - 99334
- 99335 - 99335
- 99336 - 99336
- 99337 - 99337
- 99339 - 99339
- 99340 - 99340
- 99341 - 99341
- 99342 - 99342
- 99343 - 99343
- 99344 - 99344
- 99345 - 99345
- 99347 - 99347
- 99348 - 99348
- 99349 - 99349
- 99350 - 99350
- 99354 - 99354
- 99355 - 99355

- 99356 - 99356
- 99357 - 99357
- 99358 - 99358
- 99359 - 99359
- 99360 - 99360
- 99361 - 99361
- 99363 - 99363
- 99364 - 99364
- 99366 - 99366
- 99367 - 99367
- 99368 - 99368
- 99371 - 99371
- 99372 - 99372
- 99373 - 99373
- 99374 - 99374
- 99375 - 99375
- 99377 - 99377
- 99378 - 99378
- 99379 - 99379
- 99380 - 99380
- 99381 - 99381
- 99382 - 99382
- 99383 - 99383
- 99384 - 99384
- 99385 - 99385
- 99386 - 99386
- 99387 - 99387
- 99391 - 99391
- 99392 - 99392
- 99393 - 99393
- 99394 - 99394
- 99395 - 99395
- 99396 - 99396
- 99397 - 99397
- 99401 - 99401
- 99402 - 99402
- 99403 - 99403
- 99404 - 99404
- 99406 - 99406
- 99407 - 99407
- 99408 - 99408
- 99409 - 99409
- 99411 - 99411
- 99412 - 99412
- 99420 - 99420
- 99429 - 99429

- 99431 - 99431
- 99433 - 99433
- 99436 - 99436
- 99441 - 99441
- 99442 - 99442
- 99443 - 99443
- 99444 - 99444
- 99450 - 99450
- 99455 - 99455
- 99456 - 99456
- 99460 - 99460
- 99462 - 99462
- 99463 - 99463
- 99464 - 99464
- 99471 - 99471
- 99472 - 99472
- 99475 - 99475
- 99476 - 99476
- 99478 - 99478
- 99479 - 99479
- 99480 - 99480
- 99499 - 99499

### *Cholecystitis*

This event measure was defined as occurring when any of the following criteria were met:

- The occurrence of **Inpatient Confinement** with the following attributes:
  - **ICD-9 Diagnosis Code (any position)** is any of: { 575.10, 574.0, 574.00, 574.01, 574.1, 574.10, 574.11, 574.3, 574.30, 574.31, 574.4, 574.40, 574.41, 574.6, 574.60, 574.61, 574.7, 574.70, 574.71, 574.8, 574.80, 574.81, 575.0, 575.1, 575.11, 575.12 }

- 575.10 - CHOLECYSTITIS UNSPECIFIED
  - 574.0 - CALCULUS OF GALLBLADDER WITH ACUTE CHOLECYSTITIS
  - 574.00 - CALCULUS OF GALLBLADDER WITH ACUTE CHOLECYSTITIS WITHOUT OBSTRUCTION
  - 574.01 - CALCULUS OF GALLBLADDER WITH ACUTE CHOLECYSTITIS WITH OBSTRUCTION
  - 574.1 - CALCULUS OF GALLBLADDER WITH OTHER CHOLECYSTITIS
  - 574.10 - CALCULUS OF GALLBLADDER WITH OTHER CHOLECYSTITIS WITHOUT OBSTRUCTION
  - 574.11 - CALCULUS OF GALLBLADDER WITH OTHER CHOLECYSTITIS WITH OBSTRUCTION
  - 574.3 - CALCULUS OF BILE DUCT WITH ACUTE CHOLECYSTITIS
  - 574.30 - CALCULUS OF BILE DUCT WITH ACUTE CHOLECYSTITIS WITHOUT OBSTRUCTION
  - 574.31 - CALCULUS OF BILE DUCT WITH ACUTE CHOLECYSTITIS WITH OBSTRUCTION
  - 574.4 - CALCULUS OF BILE DUCT WITH OTHER CHOLECYSTITIS
  - 574.40 - CALCULUS OF BILE DUCT WITH OTHER CHOLECYSTITIS WITHOUT OBSTRUCTION
  - 574.41 - CALCULUS OF BILE DUCT WITH OTHER CHOLECYSTITIS WITH OBSTRUCTION
  - 574.6 - CALCULUS OF GALLBLADDER AND BILE DUCT WITH ACUTE CHOLECYSTITIS
  - 574.60 - CALCULUS OF GALLBLADDER AND BILE DUCT WITH ACUTE CHOLECYSTITIS WITHOUT OBSTRUCTION
  - 574.61 - CALCULUS OF GALLBLADDER AND BILE DUCT WITH ACUTE CHOLECYSTITIS WITH OBSTRUCTION
  - 574.7 - CALCULUS OF GALLBLADDER AND BILE DUCT WITH OTHER CHOLECYSTITIS
  - 574.70 - CALCULUS OF GALLBLADDER AND BILE DUCT WITH OTHER CHOLECYSTITIS WITHOUT OBSTRUCTION
  - 574.71 - CALCULUS OF GALLBLADDER AND BILE DUCT WITH OTHER CHOLECYSTITIS WITH OBSTRUCTION
  - 574.8 - CALCULUS OF GALLBLADDER AND BILE DUCT WITH ACUTE AND CHRONIC CHOLECYSTITIS
  - 574.80 - CALCULUS OF GALLBLADDER AND BILE DUCT WITH ACUTE AND CHRONIC CHOLECYSTITIS WITHOUT OBSTRUCTION
  - 574.81 - CALCULUS OF GALLBLADDER AND BILE DUCT WITH ACUTE AND CHRONIC CHOLECYSTITIS WITH OBSTRUCTION
  - 575.0 - ACUTE CHOLECYSTITIS
  - 575.1 - OTHER CHOLECYSTITIS
  - 575.11 - CHRONIC CHOLECYSTITIS
  - 575.12 - ACUTE AND CHRONIC CHOLECYSTITIS
- The occurrence of **Medical Services** with the following attributes:
    - **ICD-9 Diagnosis Code (any position)** is any of: { 575.10, 574.0, 574.00, 574.01, 574.1, 574.10, 574.11, 574.3, 574.30, 574.31, 574.4, 574.40, 574.41, 574.6, 574.60, 574.61, 574.7, 574.70, 574.71, 574.8, 574.80, 574.81, 575.0, 575.1, 575.11, 575.12 }

- 575.10 - CHOLECYSTITIS UNSPECIFIED
- 574.0 - CALCULUS OF GALLBLADDER WITH ACUTE CHOLECYSTITIS
- 574.00 - CALCULUS OF GALLBLADDER WITH ACUTE CHOLECYSTITIS WITHOUT OBSTRUCTION
- 574.01 - CALCULUS OF GALLBLADDER WITH ACUTE CHOLECYSTITIS WITH OBSTRUCTION
- 574.1 - CALCULUS OF GALLBLADDER WITH OTHER CHOLECYSTITIS
- 574.10 - CALCULUS OF GALLBLADDER WITH OTHER CHOLECYSTITIS WITHOUT OBSTRUCTION
- 574.11 - CALCULUS OF GALLBLADDER WITH OTHER CHOLECYSTITIS WITH OBSTRUCTION
- 574.3 - CALCULUS OF BILE DUCT WITH ACUTE CHOLECYSTITIS
- 574.30 - CALCULUS OF BILE DUCT WITH ACUTE CHOLECYSTITIS WITHOUT OBSTRUCTION
- 574.31 - CALCULUS OF BILE DUCT WITH ACUTE CHOLECYSTITIS WITH OBSTRUCTION
- 574.4 - CALCULUS OF BILE DUCT WITH OTHER CHOLECYSTITIS
- 574.40 - CALCULUS OF BILE DUCT WITH OTHER CHOLECYSTITIS WITHOUT OBSTRUCTION
- 574.41 - CALCULUS OF BILE DUCT WITH OTHER CHOLECYSTITIS WITH OBSTRUCTION
- 574.6 - CALCULUS OF GALLBLADDER AND BILE DUCT WITH ACUTE CHOLECYSTITIS
- 574.60 - CALCULUS OF GALLBLADDER AND BILE DUCT WITH ACUTE CHOLECYSTITIS WITHOUT OBSTRUCTION
- 574.61 - CALCULUS OF GALLBLADDER AND BILE DUCT WITH ACUTE CHOLECYSTITIS WITH OBSTRUCTION
- 574.7 - CALCULUS OF GALLBLADDER AND BILE DUCT WITH OTHER CHOLECYSTITIS
- 574.70 - CALCULUS OF GALLBLADDER AND BILE DUCT WITH OTHER CHOLECYSTITIS WITHOUT OBSTRUCTION
- 574.71 - CALCULUS OF GALLBLADDER AND BILE DUCT WITH OTHER CHOLECYSTITIS WITH OBSTRUCTION
- 574.8 - CALCULUS OF GALLBLADDER AND BILE DUCT WITH ACUTE AND CHRONIC CHOLECYSTITIS
- 574.80 - CALCULUS OF GALLBLADDER AND BILE DUCT WITH ACUTE AND CHRONIC CHOLECYSTITIS WITHOUT OBSTRUCTION
- 574.81 - CALCULUS OF GALLBLADDER AND BILE DUCT WITH ACUTE AND CHRONIC CHOLECYSTITIS WITH OBSTRUCTION
- 575.0 - ACUTE CHOLECYSTITIS
- 575.1 - OTHER CHOLECYSTITIS
- 575.11 - CHRONIC CHOLECYSTITIS
- 575.12 - ACUTE AND CHRONIC CHOLECYSTITIS

### *Cholelithiasis*

This event measure was defined as occurring when any of the following criteria were met:

- The occurrence of **Inpatient Confinement** with the following attributes:
  - **ICD-9 Diagnosis Code (any position)** is any of: { 574, 997.41 }



- 574 - CHOLELITHIASIS
- 997.41 - RETAINED CHOLELITHIASIS FOLLOWING CHOLECYSTECTOMY
- The occurrence of **Medical Services** with the following attributes:
  - **ICD-9 Diagnosis Code (any position)** is any of: { 574, 997.41 }
    - 574 - CHOLELITHIASIS
    - 997.41 - RETAINED CHOLELITHIASIS FOLLOWING CHOLECYSTECTOMY

*Class I drugs*

This event measure was defined as occurring when any of the following criteria were met:

- The occurrence of **Prescription Claims** with the following attributes:
  - **NDC Generic Name** is any of: { ASPARAGINASE, ASPARAGINASE (ERWINIA CHRYSANTHEMI), AZATHIOPRINE, AZATHIOPRINE SODIUM, BISMUTH SUBSALICYLATE/METRONIDAZOLE/TETRACYCLINE HCL, CHLORTETRACYCLINE HCL, COLLOIDAL BISMUTH SUBCITRATE/METRONIDAZOLE/TETRACYCLINE HCL, CYTARABINE, CYTARABINE LIPOSOME/PF, CYTARABINE/PF, DIDANOSINE, DIDANOSINE/CALCIUM CARBONATE/MAGNESIUM, DIDANOSINE/SODIUM CITRATE, FUROSEMIDE, FUROSEMIDE IN 0.9 % SODIUM CHLORIDE, MERCAPTOPYRIMIDINE, NYSTATIN/TETRACYCLINE HCL/HYDROCORTISONE/DIPHENHYDRAMINE HCL, OXYTETRACYCLINE, OXYTETRACYCLINE HCL, OXYTETRACYCLINE HCL/HYDROCORTISONE ACETATE, OXYTETRACYCLINE HCL/POLYMYXIN B SULFATE, OXYTETRACYCLINE/LIDOCAINE, PENTAMIDINE ISETHIONATE, SULFASALAZINE, SULINDAC, TETRACYCLINE, TETRACYCLINE HCL, VALPROIC ACID, VALPROIC ACID (AS SODIUM SALT) (VALPROATE SODIUM), MESALAMINE, MESALAMINE WITH CLEANSING WIPES, SULFAMETHOXAZOLE/TRIMETHOPRIM, TRIMETHOPRIM, TRIMETHOPRIM, MICRONIZED, APOMORPHINE HCL, BUPRENORPHINE, BUPRENORPHINE HCL, BUPRENORPHINE HCL/NALOXONE HCL, BUTORPHANOL TARTRATE, DEZOCINE, FENTANYL, FENTANYL CITRATE, FENTANYL CITRATE IN 0.9 % SODIUM CHLORIDE/PF, FENTANYL CITRATE/BUPIVACAINE HCL IN 0.9 % SODIUM CHLORIDE/PF, FENTANYL CITRATE/DEXTROSE 5%-WATER/PF, FENTANYL CITRATE/DROPERIDOL, FENTANYL CITRATE/PF, FENTANYL CITRATE/ROPIVACAINE HCL/SODIUM CHLORIDE 0.9%/PF, GUAIFENESIN/HYDROMORPHONE HCL, HYDROMORPHONE HCL, HYDROMORPHONE HCL IN 0.9 % SODIUM CHLORIDE, HYDROMORPHONE HCL IN 0.9 % SODIUM CHLORIDE/PF, HYDROMORPHONE HCL IN DEXTROSE 5 %-WATER/PF, HYDROMORPHONE HCL/BUPIVACAINE HCL IN 0.9% SODIUM CHLORIDE/PF, HYDROMORPHONE HCL/PF, IBUPROFEN/OXYCODONE HCL, IPRATROPIUM BROMIDE, IPRATROPIUM BROMIDE/ALBUTEROL SULFATE, METHADONE HCL, METHADONE HYDROCHLORIDE IN 0.9 % SODIUM CHLORIDE, MORPHINE SULFATE, MORPHINE SULFATE IN 0.9 % SODIUM CHLORIDE, MORPHINE SULFATE IN 0.9 % SODIUM CHLORIDE/PF, MORPHINE SULFATE IN SODIUM CHLORIDE, ISO-OSMOTIC/PF, MORPHINE SULFATE LIPOSOMAL/PF, MORPHINE SULFATE/DEXTROSE 5 % IN WATER, MORPHINE

SULFATE/DEXTROSE 5%-WATER/PF, MORPHINE SULFATE/NALTREXONE HCL, MORPHINE SULFATE/PF, NALBUPHINE HCL, OPIUM TINCTURE, OPIUM/BELLADONNA ALKALOIDS, OXYCODONE HCL, OXYCODONE HCL/ACETAMINOPHEN, OXYCODONE HCL/ASPIRIN, OXYCODONE HCL/OXYCODONE TEREPHTHALATE/ASPIRIN, OXYCODONE/ASPIRIN, TAPENTADOL HCL, TIOTROPIUM BROMIDE, TRAMADOL HCL, TRAMADOL HCL/ACETAMINOPHEN, TRAMADOL HCL/DIETARY SUPPLEMENT,MISC. CB.11, TRAMADOL HCL/GLUCOSAMINE SULFATE, ACETIC ACID/HYDROCORTISONE, ACYCLOVIR/HYDROCORTISONE, ALDOSTERONE, AZELASTINE HCL/FLUTICASONE PROPIONATE, BENZOYL PEROXIDE/HYDROCORTISONE, BENZOYL PEROXIDE/HYDROCORTISONE/SKIN CLEANSER COMB NO.14, BETAMETHASONE, BETAMETHASONE ACETATE, BETAMETHASONE ACETATE/BETAMETHASONE SODIUM PHOSPHATE, BETAMETHASONE DIPROPIONATE, BETAMETHASONE DIPROPIONATE/PROPYLENE GLYCOL, BETAMETHASONE SODIUM PHOSPHATE, BETAMETHASONE VALERATE, BUDESONIDE, BUDESONIDE, MICRONIZED, BUDESONIDE/FORMOTEROL FUMARATE, CALCIPOTRIENE/BETAMETHASONE DIPROPIONATE, CHLORCYCLIZINE HCL/HYDROCORTISONE ACETATE, CHLOROXYLENOL/BENZOCAINE/HYDROCORTISONE ACETATE, CICLESONIDE, CIPROFLOXACIN HCL/DEXAMETHASONE, CIPROFLOXACIN HCL/HYDROCORTISONE, CLIOQUINOL/HYDROCORTISONE, CLIOQUINOL/HYDROCORTISONE/EMOLLIENT COMBINATION NO.88, CLIOQUINOL/HYDROCORTISONE/PRAMOXINE, CLOTRIMAZOLE/BETAMETHASONE DIPROPIONATE, CORTISONE ACETATE, DEXAMETHASONE, DEXAMETHASONE ACETATE, DEXAMETHASONE ACETATE, MICRONIZED, DEXAMETHASONE ISONICOTINATE, DEXAMETHASONE PHOSPHATE, DEXAMETHASONE SOD PHOSPHATE, DEXAMETHASONE SODIUM PHOSPHATE IN 0.9 % SODIUM CHLORIDE, DEXAMETHASONE SODIUM PHOSPHATE/PF, DEXAMETHASONE, MICRONIZED, DIPHENHYDRAMINE HCL/HYDROCORTISONE, FLUDROCORTISONE ACETATE, FLUNISOLIDE, FLUNISOLIDE/MENTHOL, FLUTICASONE FUROATE, FLUTICASONE FUROATE/VILANTEROL TRIFENATATE, FLUTICASONE PROPIONATE, FLUTICASONE PROPIONATE/SALMETEROL XINAFOATE, GENTAMICIN SULFATE/PREDNISOLONE ACETATE, HYDROCORTISONE, HYDROCORTISONE ACETATE, HYDROCORTISONE ACETATE/ALOE POLYSACCHARIDE/IODOQUINOL, HYDROCORTISONE ACETATE/ALOE VERA, HYDROCORTISONE ACETATE/IODOQUINOL/ALOE POLYSACCHARIDES #2, HYDROCORTISONE ACETATE/IODOQUINOL/ALOE VERA, HYDROCORTISONE ACETATE/LIDOCAINE HCL, HYDROCORTISONE ACETATE/LIDOCAINE HCL/ALOE VERA, HYDROCORTISONE ACETATE/LIDOCAINE HCL/SKIN CLEANSER NO.6, HYDROCORTISONE ACETATE/PRAMOXINE HCL, HYDROCORTISONE ACETATE/PRAMOXINE HCL/ALOE POLYSACCHARIDE, HYDROCORTISONE ACETATE/PRAMOXINE HCL/EMOLLIENT BASE, HYDROCORTISONE ACETATE/PRAMOXINE HCL/SKIN CLEANSER NO.16, HYDROCORTISONE ACETATE/PRAMOXINE/EMOLLIENT/PRAMOXINE COMB#1, HYDROCORTISONE ACETATE/UREA, HYDROCORTISONE BUTYRATE, HYDROCORTISONE BUTYRATE/EMOLLIENT BASE, HYDROCORTISONE CYPIONATE, HYDROCORTISONE HEMISUCCINATE,

HYDROCORTISONE PROBUTATE, HYDROCORTISONE SOD PHOSPHATE,  
HYDROCORTISONE SOD SUCCINATE, HYDROCORTISONE SODIUM  
SUCCINATE/PF, HYDROCORTISONE VALERATE, HYDROCORTISONE/ALOE  
POLYSACCHARIDE/IODOQUINOL, HYDROCORTISONE/ALOE VERA,  
HYDROCORTISONE/ALOE VERA/VITAMIN E ACETATE/VITAMINS A AND D,  
HYDROCORTISONE/COLLOIDAL OATMEAL/ALOE/VITAMIN E,  
HYDROCORTISONE/EMOLLIENT COMBINATION NO.45,  
HYDROCORTISONE/IODOQUINOL, HYDROCORTISONE/MINERAL  
OIL/PETROLATUM,WHITE, HYDROCORTISONE/PRAMOXINE  
HCL/CHLOROXYLENOL, HYDROCORTISONE/PRAMOXINE  
HCL/CHLOROXYLENOL/WATER,  
HYDROCORTISONE/PRAMOXINE/CHLOROXYLENOL/BENZALKONIUM,  
HYDROCORTISONE/RESORCINOL/BISMUTH SUBGALLATE/ZINC OXIDE,  
HYDROCORTISONE/SALICYLIC ACID/SULFUR, HYDROCORTISONE/SALICYLIC  
ACID/SULFUR/SHAMPOO CMB 1, HYDROCORTISONE/SKIN CLEANSER  
COMBINATION NO.25, HYDROCORTISONE/YERBA SANTA,  
KETOCONAZOLE/HYDROCORTISONE, LIDOCAINE HCL/HYDROCORTISONE  
ACETATE/PSYLLIUM HUSK, METHYLPREDNISOLONE,  
METHYLPREDNISOLONE ACETATE, METHYLPREDNISOLONE ACETATE,  
MICRONIZED, METHYLPREDNISOLONE SODIUM SUCCINATE,  
METHYLPREDNISOLONE SODIUM SUCCINATE/PF, METHYLPREDNISOLONE,  
MICRONIZED, MOMETASONE FUROATE, MOMETASONE  
FUROATE/AMMONIUM LACTATE, MOMETASONE FUROATE/FORMOTEROL  
FUMARATE, NEOMYCIN SULFATE/BACITRACIN ZINC/POLYMYXIN  
B/HYDROCORTISONE, NEOMYCIN SULFATE/COLISTIN  
SULFATE/HYDROCORTISONE, NEOMYCIN SULFATE/COLISTIN  
SULFATE/HYDROCORTISONE/THONZONIUM, NEOMYCIN  
SULFATE/DEXAMETHASONE SOD PHOSPHATE, NEOMYCIN  
SULFATE/HYDROCORTISONE, NEOMYCIN SULFATE/HYDROCORTISONE  
ACETATE, NEOMYCIN SULFATE/POLYMYXIN B  
SULFATE/BUFFERS/HYDROCORTISONE, NEOMYCIN SULFATE/POLYMYXIN B  
SULFATE/HYDROCORTISONE, NEOMYCIN SULFATE/POLYMYXIN B  
SULFATE/PREDNISOLONE, NEOMYCIN/BACITRACIN/POLYMYXIN  
B/HYDROCORTISONE, NEOMYCIN/POLYMYXIN B  
SULFATE/DEXAMETHASONE,  
NYSTATIN/HYDROCORTISONE/DIPHENHYDRAMINE HCL,  
NYSTATIN/TRIAMCINOLONE ACETONIDE, POLYMYXIN B  
SULFATE/HYDROCORTISONE, PREDNISOLONE, PREDNISOLONE ACETATE,  
PREDNISOLONE ACETATE, MICRONIZED, PREDNISOLONE SOD PHOSPHATE,  
PREDNISOLONE SODIUM PHOSPHATE/PEAK FLOW METER, PREDNISOLONE,  
MICRONIZED, PREDNISONE, PREDNISONE MICRONIZED, RIMEXOLONE,  
SULFACETAMIDE SODIUM/PREDNISOLONE ACETATE, SULFACETAMIDE  
SODIUM/PREDNISOLONE SODIUM PHOSPHATE,  
TOBRAMYCIN/DEXAMETHASONE, TRIAMCINOLONE, TRIAMCINOLONE  
ACETONIDE, TRIAMCINOLONE ACETONIDE/EMOLLIENT COMBINATION  
NO.45, TRIAMCINOLONE ACETONIDE/EMOLLIENT COMBINATION NO.86,  
TRIAMCINOLONE ACETONIDE/HYDROPHILIC OINTMENT, TRIAMCINOLONE  
ACETONIDE/L.S.B., TRIAMCINOLONE ACETONIDE/LIDOCAINE HCL,  
TRIAMCINOLONE ACETONIDE/PF, TRIAMCINOLONE ACETONIDE/SKIN  
CLNSR6/EMOLLIENT 27, TRIAMCINOLONE ACETONIDE/UREA/HYDROPHILIC

OINTMENT, TRIAMCINOLONE DIACETATE, TRIAMCINOLONE  
HEXACETONIDE, TRIAMCINOLONE HEXACETONIDE, MICRONIZED,  
DESOGESTREL-ETHINYL ESTRADIOL, DESOGESTREL-ETHINYL  
ESTRADIOL/ETHINYL ESTRADIOL, DIENESTROL, DIETHYLSTILBESTROL,  
DIETHYLSTILBESTROL DIPHOS, DROSPIRENONE/ESTRADIOL,  
DROSPIRENONE/ETHINYL ESTRADIOL/LEVOMEFOLATE CALCIUM,  
ESTRADIOL, ESTRADIOL ACETATE, ESTRADIOL BENZOATE, ESTRADIOL  
CYPIONATE, ESTRADIOL CYPIONATE/MEDROXYPROGESTERONE ACETATE,  
ESTRADIOL HEMIHYDRATE, MICRONIZED, ESTRADIOL MICRONIZED,  
ESTRADIOL VALERATE, ESTRADIOL VALERATE/DIENOGEST,  
ESTRADIOL/LEVONORGESTREL, ESTRADIOL/NORETHINDRONE ACETATE,  
ESTRADIOL/NORGESTIMATE, ESTRIOL, ESTRIOL MICRONIZED, ESTROGENS,  
CONJUGATED, ESTROGENS, CONJUGATED/MEDROXYPROGESTERONE  
ACETATE, ESTROGENS, CONJUGATED/MEPROBAMATE,  
ESTROGENS,CONJ.,SYNTHETIC A, ESTROGENS,CONJ.,SYNTHETIC B,  
ESTROGENS,ESTERIFIED, ESTROGENS,ESTERIFIED/METHYLTESTOSTERONE,  
ESTRONE, ETHINYL ESTRADIOL, ETHINYL ESTRADIOL/DROSPIRENONE,  
ETHYNODIOL D-ETHINYL ESTRADIOL, ETONOGESTREL/ETHINYL  
ESTRADIOL, LEVONORGESTREL-ETH ESTRA/ETHINYL ESTRADIOL,  
LEVONORGESTREL-ETHINYL ESTRADIOL, NORELGESTROMIN/ETHINYL  
ESTRADIOL, NORETHINDRONE A-E ESTRADIOL, NORETHINDRONE A-E  
ESTRADIOL/FERROUS FUMARATE, NORETHINDRONE ACETATE/ETHINYL  
ESTRADIOL, NORETHINDRONE-ETHINYL ESTRADIOL, NORETHINDRONE-  
ETHINYL ESTRADIOL/FERROUS FUMARATE, NORGESTIMATE-ETHINYL  
ESTRADIOL, NORGESTREL-ETHINYL ESTRADIOL, TESTOSTERONE  
CYPIONATE/ESTRADIOL CYPIONATE, TESTOSTERONE  
ENANTHATE/ESTRADIOL VALERATE }

- ASPARAGINASE
- ASPARAGINASE (ERWINIA CHRYSANTHEMI)
- AZATHIOPRINE
- AZATHIOPRINE SODIUM
- BISMUTH SUBSALICYLATE/METRONIDAZOLE/TETRACYCLINE HCL
- CHLORTETRACYCLINE HCL
- COLLOIDAL BISMUTH SUBCITRATE/METRONIDAZOLE/TETRACYCLINE HCL
- CYTARABINE
- CYTARABINE LIPOSOME/PF
- CYTARABINE/PF
- DIDANOSINE
- DIDANOSINE/CALCIUM CARBONATE/MAGNESIUM
- DIDANOSINE/SODIUM CITRATE
- FUROSEMIDE
- FUROSEMIDE IN 0.9 % SODIUM CHLORIDE
- MERCAPTOPYRINE
- NYSTATIN/TETRACYCLINE HCL/HYDROCORTISONE/DIPHENHYDRAMINE HCL
- OXYTETRACYCLINE
- OXYTETRACYCLINE HCL
- OXYTETRACYCLINE HCL/HYDROCORTISONE ACETATE
- OXYTETRACYCLINE HCL/POLYMYXIN B SULFATE
- OXYTETRACYCLINE/LIDOCAINE
- PENTAMIDINE ISETHIONATE
- SULFASALAZINE
- SULINDAC
- TETRACYCLINE
- TETRACYCLINE HCL
- VALPROIC ACID
- VALPROIC ACID (AS SODIUM SALT) (VALPROATE SODIUM)
- MESALAMINE
- MESALAMINE WITH CLEANSING WIPES
- SULFAMETHOXAZOLE/TRIMETHOPRIM
- TRIMETHOPRIM
- TRIMETHOPRIM, MICRONIZED
- APOMORPHINE HCL
- BUPRENORPHINE
- BUPRENORPHINE HCL
- BUPRENORPHINE HCL/NALOXONE HCL
- BUTORPHANOL TARTRATE
- DEZOCINE
- FENTANYL
- FENTANYL CITRATE
- FENTANYL CITRATE IN 0.9 % SODIUM CHLORIDE/PF
- FENTANYL CITRATE/BUPIVACAINE HCL IN 0.9 % SODIUM CHLORIDE/PF
- FENTANYL CITRATE/DEXTROSE 5%-WATER/PF
- FENTANYL CITRATE/DROPERIDOL

- FENTANYL CITRATE/PF
- FENTANYL CITRATE/ROPIVACAINE HCL/SODIUM CHLORIDE 0.9%/PF
- GUAIFENESIN/HYDROMORPHONE HCL
- HYDROMORPHONE HCL
- HYDROMORPHONE HCL IN 0.9 % SODIUM CHLORIDE
- HYDROMORPHONE HCL IN 0.9 % SODIUM CHLORIDE/PF
- HYDROMORPHONE HCL IN DEXTROSE 5 %-WATER/PF
- HYDROMORPHONE HCL/BUPIVACAINE HCL IN 0.9% SODIUM CHLORIDE/PF
- HYDROMORPHONE HCL/PF
- IBUPROFEN/OXYCODONE HCL
- IPRATROPIUM BROMIDE
- IPRATROPIUM BROMIDE/ALBUTEROL SULFATE
- METHADONE HCL
- METHADONE HYDROCHLORIDE IN 0.9 % SODIUM CHLORIDE
- MORPHINE SULFATE
- MORPHINE SULFATE IN 0.9 % SODIUM CHLORIDE
- MORPHINE SULFATE IN 0.9 % SODIUM CHLORIDE/PF
- MORPHINE SULFATE IN SODIUM CHLORIDE, ISO-OSMOTIC/PF
- MORPHINE SULFATE LIPOSOMAL/PF
- MORPHINE SULFATE/DEXTROSE 5 % IN WATER
- MORPHINE SULFATE/DEXTROSE 5%-WATER/PF
- MORPHINE SULFATE/NALTREXONE HCL
- MORPHINE SULFATE/PF
- NALBUPHINE HCL
- OPIUM TINCTURE
- OPIUM/BELLADONNA ALKALOIDS
- OXYCODONE HCL
- OXYCODONE HCL/ACETAMINOPHEN
- OXYCODONE HCL/ASPIRIN
- OXYCODONE HCL/OXYCODONE TEREPHTHALATE/ASPIRIN
- OXYCODONE/ASPIRIN
- TAPENTADOL HCL
- TIOTROPIUM BROMIDE
- TRAMADOL HCL
- TRAMADOL HCL/ACETAMINOPHEN
- TRAMADOL HCL/DIETARY SUPPLEMENT,MISC. CB.11
- TRAMADOL HCL/GLUCOSAMINE SULFATE
- ACETIC ACID/HYDROCORTISONE
- ACYCLOVIR/HYDROCORTISONE
- ALDOSTERONE
- AZELASTINE HCL/FLUTICASONE PROPIONATE
- BENZOYL PEROXIDE/HYDROCORTISONE
- BENZOYL PEROXIDE/HYDROCORTISONE/SKIN CLEANSER COMB NO.14
- BETAMETHASONE
- BETAMETHASONE ACETATE
- BETAMETHASONE ACETATE/BETAMETHASONE SODIUM PHOSPHATE

- BETAMETHASONE DIPROPIONATE
- BETAMETHASONE DIPROPIONATE/PROPYLENE GLYCOL
- BETAMETHASONE SODIUM PHOSPHATE
- BETAMETHASONE VALERATE
- BUDESONIDE
- BUDESONIDE, MICRONIZED
- BUDESONIDE/FORMOTEROL FUMARATE
- CALCIPOTRIENE/BETAMETHASONE DIPROPIONATE
- CHLORCYCLIZINE HCL/HYDROCORTISONE ACETATE
- CHLOROXYLENOL/BENZOCAINE/HYDROCORTISONE ACETATE
- CICLESONIDE
- CIPROFLOXACIN HCL/DEXAMETHASONE
- CIPROFLOXACIN HCL/HYDROCORTISONE
- CLIOQUINOL/HYDROCORTISONE
- CLIOQUINOL/HYDROCORTISONE/EMOLLIENT COMBINATION NO.88
- CLIOQUINOL/HYDROCORTISONE/PRAMOXINE
- CLOTRIMAZOLE/BETAMETHASONE DIPROPIONATE
- CORTISONE ACETATE
- DEXAMETHASONE
- DEXAMETHASONE ACETATE
- DEXAMETHASONE ACETATE, MICRONIZED
- DEXAMETHASONE ISONICOTINATE
- DEXAMETHASONE PHOSPHATE
- DEXAMETHASONE SOD PHOSPHATE
- DEXAMETHASONE SODIUM PHOSPHATE IN 0.9 % SODIUM CHLORIDE
- DEXAMETHASONE SODIUM PHOSPHATE/PF
- DEXAMETHASONE, MICRONIZED
- DIPHENHYDRAMINE HCL/HYDROCORTISONE
- FLUDROCORTISONE ACETATE
- FLUNISOLIDE
- FLUNISOLIDE/MENTHOL
- FLUTICASONE FUROATE
- FLUTICASONE FUROATE/VILANTEROL TRIFENATATE
- FLUTICASONE PROPIONATE
- FLUTICASONE PROPIONATE/SALMETEROL XINAFOATE
- GENTAMICIN SULFATE/PREDNISOLONE ACETATE
- HYDROCORTISONE
- HYDROCORTISONE ACETATE
- HYDROCORTISONE ACETATE/ALOE POLYSACCHARIDE/IODOQUINOL
- HYDROCORTISONE ACETATE/ALOE VERA
- HYDROCORTISONE ACETATE/IODOQUINOL/ALOE POLYSACCHARIDES #2
- HYDROCORTISONE ACETATE/IODOQUINOL/ALOE VERA
- HYDROCORTISONE ACETATE/LIDOCAINE HCL
- HYDROCORTISONE ACETATE/LIDOCAINE HCL/ALOE VERA
- HYDROCORTISONE ACETATE/LIDOCAINE HCL/SKIN CLEANSER NO.6
- HYDROCORTISONE ACETATE/PRAMOXINE HCL

- HYDROCORTISONE ACETATE/PRAMOXINE HCL/ALOE POLYSACCHARIDE
- HYDROCORTISONE ACETATE/PRAMOXINE HCL/EMOLLIENT BASE
- HYDROCORTISONE ACETATE/PRAMOXINE HCL/SKIN CLEANSER NO.16
- HYDROCORTISONE ACETATE/PRAMOXINE/EMOLLIENT/PRAMOXINE COMB#1
- HYDROCORTISONE ACETATE/UREA
- HYDROCORTISONE BUTYRATE
- HYDROCORTISONE BUTYRATE/EMOLLIENT BASE
- HYDROCORTISONE CYPIONATE
- HYDROCORTISONE HEMISUCCINATE
- HYDROCORTISONE PROBUTATE
- HYDROCORTISONE SOD PHOSPHATE
- HYDROCORTISONE SOD SUCCINATE
- HYDROCORTISONE SODIUM SUCCINATE/PF
- HYDROCORTISONE VALERATE
- HYDROCORTISONE/ALOE POLYSACCHARIDE/IODOQUINOL
- HYDROCORTISONE/ALOE VERA
- HYDROCORTISONE/ALOE VERA/VITAMIN E ACETATE/VITAMINS A AND D
- HYDROCORTISONE/COLLOIDAL OATMEAL/ALOE/VITAMIN E
- HYDROCORTISONE/EMOLLIENT COMBINATION NO.45
- HYDROCORTISONE/IODOQUINOL
- HYDROCORTISONE/MINERAL OIL/PETROLATUM,WHITE
- HYDROCORTISONE/PRAMOXINE HCL/CHLOROXYLENOL
- HYDROCORTISONE/PRAMOXINE HCL/CHLOROXYLENOL/WATER
- HYDROCORTISONE/PRAMOXINE/CHLOROXYLENOL/BENZALKONIUM
- HYDROCORTISONE/RESORCINOL/BISMUTH SUBGALLATE/ZINC OXIDE
- HYDROCORTISONE/SALICYLIC ACID/SULFUR
- HYDROCORTISONE/SALICYLIC ACID/SULFUR/SHAMPOO CMB 1
- HYDROCORTISONE/SKIN CLEANSER COMBINATION NO.25
- HYDROCORTISONE/YERBA SANTA
- KETOCONAZOLE/HYDROCORTISONE
- LIDOCAINE HCL/HYDROCORTISONE ACETATE/PSYLLIUM HUSK
- METHYLPREDNISOLONE
- METHYLPREDNISOLONE ACETATE
- METHYLPREDNISOLONE ACETATE, MICRONIZED
- METHYLPREDNISOLONE SODIUM SUCCINATE
- METHYLPREDNISOLONE SODIUM SUCCINATE/PF
- METHYLPREDNISOLONE, MICRONIZED
- MOMETASONE FUROATE
- MOMETASONE FUROATE/AMMONIUM LACTATE
- MOMETASONE FUROATE/FORMOTEROL FUMARATE
- NEOMYCIN SULFATE/BACITRACIN ZINC/POLYMYXIN B/HYDROCORTISONE
- NEOMYCIN SULFATE/COLISTIN SULFATE/HYDROCORTISONE
- NEOMYCIN SULFATE/COLISTIN SULFATE/HYDROCORTISONE/THONZONIUM
- NEOMYCIN SULFATE/DEXAMETHASONE SOD PHOSPHATE
- NEOMYCIN SULFATE/HYDROCORTISONE
- NEOMYCIN SULFATE/HYDROCORTISONE ACETATE



- NEOMYCIN SULFATE/POLYMYXIN B SULFATE/BUFFERS/HYDROCORTISONE
- NEOMYCIN SULFATE/POLYMYXIN B SULFATE/HYDROCORTISONE
- NEOMYCIN SULFATE/POLYMYXIN B SULFATE/PREDNISOLONE
- NEOMYCIN/BACITRACIN/POLYMYXIN B/HYDROCORTISONE
- NEOMYCIN/POLYMYXIN B SULFATE/DEXAMETHASONE
- NYSTATIN/HYDROCORTISONE/DIPHENHYDRAMINE HCL
- NYSTATIN/TRIAMCINOLONE ACETONIDE
- POLYMYXIN B SULFATE/HYDROCORTISONE
- PREDNISOLONE
- PREDNISOLONE ACETATE
- PREDNISOLONE ACETATE, MICRONIZED
- PREDNISOLONE SOD PHOSPHATE
- PREDNISOLONE SODIUM PHOSPHATE/PEAK FLOW METER
- PREDNISOLONE, MICRONIZED
- PREDNISON
- PREDNISON MICRONIZED
- RIMEXOLONE
- SULFACETAMIDE SODIUM/PREDNISOLONE ACETATE
- SULFACETAMIDE SODIUM/PREDNISOLONE SODIUM PHOSPHATE
- TOBRAMYCIN/DEXAMETHASONE
- TRIAMCINOLONE
- TRIAMCINOLONE ACETONIDE
- TRIAMCINOLONE ACETONIDE/EMOLLIENT COMBINATION NO.45
- TRIAMCINOLONE ACETONIDE/EMOLLIENT COMBINATION NO.86
- TRIAMCINOLONE ACETONIDE/HYDROPHILIC OINTMENT
- TRIAMCINOLONE ACETONIDE/L.S.B.
- TRIAMCINOLONE ACETONIDE/LIDOCAINE HCL
- TRIAMCINOLONE ACETONIDE/PF
- TRIAMCINOLONE ACETONIDE/SKIN CLNSR6/EMOLLIENT 27
- TRIAMCINOLONE ACETONIDE/UREA/HYDROPHILIC OINTMENT
- TRIAMCINOLONE DIACETATE
- TRIAMCINOLONE HEXACETONIDE
- TRIAMCINOLONE HEXACETONIDE, MICRONIZED
- DESOGESTREL-ETHINYL ESTRADIOL
- DESOGESTREL-ETHINYL ESTRADIOL/ETHINYL ESTRADIOL
- DIENESTROL
- DIETHYLSTILBESTROL
- DIETHYLSTILBESTROL DIPHOS
- DROSPIRENONE/ESTRADIOL
- DROSPIRENONE/ETHINYL ESTRADIOL/LEVOMEFOLATE CALCIUM
- ESTRADIOL
- ESTRADIOL ACETATE
- ESTRADIOL BENZOATE
- ESTRADIOL CYPIONATE
- ESTRADIOL CYPIONATE/MEDROXYPROGESTERONE ACETATE
- ESTRADIOL HEMIHYDRATE, MICRONIZED

- ESTRADIOL MICRONIZED
- ESTRADIOL VALERATE
- ESTRADIOL VALERATE/DIENOGEST
- ESTRADIOL/LEVONORGESTREL
- ESTRADIOL/NORETHINDRONE ACETATE
- ESTRADIOL/NORGESTIMATE
- ESTRIOL
- ESTRIOL MICRONIZED
- ESTROGENS, CONJUGATED
- ESTROGENS, CONJUGATED/MEDROXYPROGESTERONE ACETATE
- ESTROGENS, CONJUGATED/MEPROBAMATE
- ESTROGENS,CONJ.,SYNTHETIC A
- ESTROGENS,CONJ.,SYNTHETIC B
- ESTROGENS,ESTERIFIED
- ESTROGENS,ESTERIFIED/METHYLTESTOSTERONE
- ESTRONE
- ETHINYL ESTRADIOL
- ETHINYL ESTRADIOL/DROSPIRENONE
- ETHYNODIOL D-ETHINYL ESTRADIOL
- ETONOGESTREL/ETHINYL ESTRADIOL
- LEVONORGESTREL-ETH ESTRA/ETHINYL ESTRADIOL
- LEVONORGESTREL-ETHINYL ESTRADIOL
- NORELGESTROMIN/ETHINYL ESTRADIOL
- NORETHINDRONE A-E ESTRADIOL
- NORETHINDRONE A-E ESTRADIOL/FERROUS FUMARATE
- NORETHINDRONE ACETATE/ETHINYL ESTRADIOL
- NORETHINDRONE-ETHINYL ESTRADIOL
- NORETHINDRONE-ETHINYL ESTRADIOL/FERROUS FUMARATE
- NORGESTIMATE-ETHINYL ESTRADIOL
- NORGESTREL-ETHINYL ESTRADIOL
- TESTOSTERONE CYPIONATE/ESTRADIOL CYPIONATE
- TESTOSTERONE ENANTHATE/ESTRADIOL VALERATE

*Class II drugs*

This event measure was defined as occurring when any of the following criteria were met:

- The occurrence of **Prescription Claims** with the following attributes:
  - **NDC Generic Name** is any of: { ABACAVIR SULFATE/LAMIVUDINE, ABACAVIR SULFATE/LAMIVUDINE/ZIDOVUDINE, ACETAMINOPHEN, ACETAMINOPHEN WITH CODEINE PHOSPHATE, ACETAMINOPHEN/BROMELAINS, ACETAMINOPHEN/CAFFEINE, ACETAMINOPHEN/CALCIUM CARBONATE, ACETAMINOPHEN/CALCIUM CARBONATE/CAFFEINE/GLYCINE, ACETAMINOPHEN/CALCIUM CARBONATE/MAGNESIUM/CAFFEINE/CALCIUM, ACETAMINOPHEN/CHLORPHENIRAMINE MALEATE, ACETAMINOPHEN/DEXBROMPHENIRAMINE MALEATE,

ACETAMINOPHEN/DIPHENHYDRAMINE CITRATE,  
 ACETAMINOPHEN/DIPHENHYDRAMINE HCL,  
 ACETAMINOPHEN/MAGNESIUM SALICYLATE/PAMABROM,  
 ACETAMINOPHEN/MELATONIN, ACETAMINOPHEN/PAMABROM,  
 ACETAMINOPHEN/PAMABROM/MAGNESIUM/VITAMIN E/FA/VIT BCOMP&C,  
 ACETAMINOPHEN/PAMABROM/PYRIDOXINE,  
 ACETAMINOPHEN/PAMABROM/VITAMIN E,  
 ACETAMINOPHEN/PHENYLTOLOXAMINE CIT,  
 ACETAMINOPHEN/PHENYLTOLOXAMINE CIT/CAFFEINE,  
 ACETAMINOPHEN/PYRILAMINE MALEATE, ACETAMINOPHEN/PYRILAMINE  
 MALEATE/CAFFEINE, ACETAMINOPHEN/PYRILAMINE  
 MALEATE/PAMABROM, ACETAMINOPHEN/SODIUM BICARBONATE/CITRIC  
 ACID, ALISKIREN HEMIFUMARATE/AMLODIPINE/HYDROCHLOROTHIAZIDE,  
 ALISKIREN HEMIFUMARATE/HYDROCHLOROTHIAZIDE, AMILORIDE  
 HCL/HYDROCHLOROTHIAZIDE, AMLODIPINE  
 BESYLATE/VALSARTAN/HYDROCHLOROTHIAZIDE,  
 ASPIRIN/ACETAMINOPHEN, ASPIRIN/ACETAMINOPHEN/CAFFEINE,  
 ASPIRIN/ACETAMINOPHEN/CAFFEINE/CALCIUM,  
 ASPIRIN/ACETAMINOPHEN/CAFFEINE/POTASSIUM,  
 ASPIRIN/ACETAMINOPHEN/CALCIUM CARBONATE,  
 ASPIRIN/ACETAMINOPHEN/MAGNESIUM/ALUMINUM  
 HYDROXIDE/CAFFEINE,  
 ASPIRIN/SALICYLAMIDE/ACETAMINOPHEN/CAFFEINE, BENAZEPRIL  
 HCL/HYDROCHLOROTHIAZIDE, BISOPROLOL  
 FUMARATE/HYDROCHLOROTHIAZIDE, BUTALBITAL/ACETAMINOPHEN,  
 BUTALBITAL/ACETAMINOPHEN/CAFFEINE,  
 BUTALBITAL/ACETAMINOPHEN/CAFFEINE/CODEINE PHOSPHATE,  
 CANDESARTAN CILEXETIL/HYDROCHLOROTHIAZIDE,  
 CAPTOPRIL/HYDROCHLOROTHIAZIDE, CARBAMAZEPINE,  
 CHLORPHENIRAMINE MALEATE/CODEINE PHOSPHATE/ACETAMINOPHEN,  
 CHLORPHENIRAMINE/DEXTROMETHORPHAN/ACETAMINOPHEN/GUAIFENE  
 SIN, CINNAMEDRINE HCL/ACETAMINOPHEN/PYRILAMINE/PAMABROM,  
 CISPLATIN,  
 CODEINE/ASPIRIN/SALICYLAMIDE/ACETAMINOPHEN/CAFFEINE,  
 DESERPIDINE/HYDROCHLOROTHIAZIDE, DEXTROMETHORPHAN  
 HBR/ACETAMINOPHEN, DEXTROMETHORPHAN  
 HBR/ACETAMINOPHEN/CHLORPHENIRAMINE MALEATE,  
 DEXTROMETHORPHAN HBR/ACETAMINOPHEN/DIPHENHYDRAMINE HCL,  
 DEXTROMETHORPHAN HBR/ACETAMINOPHEN/DOXYLAMINE,  
 DEXTROMETHORPHAN HBR/P-EPHED  
 HCL/ACETAMINOPHEN/DOXYLAMINE, DEXTROMETHORPHAN HBR/P-  
 EPHED HCL/ACETAMINOPHEN/DP-HYDRAMINE, DEXTROMETHORPHAN  
 HBR/PHENYLEPHRINE HCL/ACETAMINOPHEN, DEXTROMETHORPHAN  
 HBR/PHENYLEPHRINE/ACETAMINOPHEN/CHLORPHENIR,  
 DEXTROMETHORPHAN  
 HBR/PHENYLEPHRINE/ACETAMINOPHEN/DOXYLAMINE,  
 DEXTROMETHORPHAN  
 HBR/PHENYLEPHRINE/ACETAMINOPHEN/PYRILAMINE,  
 DEXTROMETHORPHAN HBR/PPA  
 BIT/ACETAMINOPHEN/CHLORPHENIRAMINE, DEXTROMETHORPHAN

HBR/PPA HCL/ACETAMINOPHEN/CHLORPHENIRAMINE,  
DEXTROMETHORPHAN HBR/PPA HCL/ACETAMINOPHEN/PYRILAMINE,  
DEXTROMETHORPHAN HBR/PSEUDOEPHEDRINE HCL/ACETAMINOPHEN,  
DEXTROMETHORPHAN HBR/PSEUDOEPHEDRINE  
HCL/ACETAMINOPHEN/PYRIL,  
DEXTROMETHORPHAN/PSEUDOEPHEDRINE/ACETAMINOPHEN/BROMPHEN  
IRAM,  
DEXTROMETHORPHAN/PSEUDOEPHEDRINE/ACETAMINOPHEN/CHLORPHE  
NIR, DIHYDROCODEINE BITARTRATE/ACETAMINOPHEN/CAFFEINE,  
DIPHENHYDRAMINE HCL/PHENYLEPHRINE HCL/ACETAMINOPHEN,  
DIPHENHYDRAMINE HCL/PHENYLEPHRINE  
HCL/ACETAMINOPHEN/GUAIFEN,  
DIPHENHYDRAMINE/PHENYLEPHRINE/DEXTRMETHORPH/ACETAMINOPHE  
N/GG,  
DOXYLAMINE/PHENYLEPHRINE/DEXTROMETHORPHAN/ACETAMINOPHEN/  
GG, ENALAPRIL MALEATE, ENALAPRIL MALEATE/FELODIPINE, ENALAPRIL  
MALEATE/HYDROCHLOROTHIAZIDE, ENALAPRILAT DIHYDRATE,  
EPROSARTAN MESYLATE/HYDROCHLOROTHIAZIDE, ERYTHROMYCIN BASE,  
ERYTHROMYCIN BASE/BENZOYL PEROXIDE, ERYTHROMYCIN BASE/ETHYL  
ALCOHOL, ERYTHROMYCIN ESTOLATE, ERYTHROMYCIN ETHYLSUCCINATE,  
ERYTHROMYCIN ETHYLSUCCINATE/SULFISOXAZOLE ACETYL,  
ERYTHROMYCIN GLUCEPTATE, ERYTHROMYCIN LACTOBIONATE,  
ERYTHROMYCIN STEARATE, FOSINOPRIL SODIUM/HYDROCHLOROTHIAZIDE,  
GUAIFENESIN/ACETAMINOPHEN, GUAIFENESIN/DEXTROMETHORPHAN  
HBR/ACETAMINOPHEN, GUAIFENESIN/PHENYLEPHRINE  
HCL/ACETAMINOPHEN, GUAIFENESIN/PHENYLEPHRINE  
HCL/ACETAMINOPHEN/CAFFEINE, GUAIFENESIN/PHENYLPROPANOLAMINE  
HCL/ACETAMINOPHEN, GUAIFENESIN/PHENYLPROPANOLAMINE  
HCL/ACETAMINOPHEN/CAFFEINE, GUAIFENESIN/PSEUDOEPHEDRINE  
HCL/ACETAMINOPHEN, GUANETHIDINE SULFATE/HYDROCHLOROTHIAZIDE,  
HYDRALAZINE HCL/HYDROCHLOROTHIAZIDE, HYDRALAZINE  
HCL/RESERPINE/HYDROCHLOROTHIAZIDE, HYDROCHLOROTHIAZIDE,  
HYDROCODONE BITARTRATE/ACETAMINOPHEN, HYDROCODONE  
BITARTRATE/ACETAMINOPHEN/DIETARY SUPPLEMENT #11, INTERFERON  
ALFA-2A,RECOMB., INTERFERON ALFA-2B,RECOMB., INTERFERON ALFA-N3,  
INTERFERON ALFACON-1, INTERFERON BETA-1A, INTERFERON BETA-  
1A/ALBUMIN HUMAN, INTERFERON BETA-1B, INTERFERON GAMMA-  
1B,RECOMB., IRBESARTAN/HYDROCHLOROTHIAZIDE, ISOMETHEPTENE  
MUCATE/CAFFEINE/ACETAMINOPHEN, ISOMETHEPTENE  
MUCATE/DICHLORALPHENAZONE/ACETAMINOPHEN, LAMIVUDINE,  
LAMIVUDINE/ZIDOVUDINE, LISINOPRIL/HYDROCHLOROTHIAZIDE,  
LOSARTAN POTASSIUM/HYDROCHLOROTHIAZIDE, MAGNESIUM  
SALICYLATE/ACETAMINOPHEN, MAGNESIUM  
SALICYLATE/ACETAMINOPHEN/CAFFEINE, MAGNESIUM  
SALICYLATE/ACETAMINOPHEN/PHENYLTOLOXAMINE/CAFFEINE,  
METHYLDOPA/HYDROCHLOROTHIAZIDE, METOPROLOL  
SUCCINATE/HYDROCHLOROTHIAZIDE, METOPROLOL  
TARTRATE/HYDROCHLOROTHIAZIDE, MOEXIPRIL  
HCL/HYDROCHLOROTHIAZIDE, OCTREOTIDE ACETATE, OLMESARTAN  
MEDOXOMIL/AMLODIPINE BESYLATE/HYDROCHLOROTHIAZIDE,

OLMESARTAN MEDOXOMIL/HYDROCHLOROTHIAZIDE, ORPHENADRINE  
CITRATE/ACETAMINOPHEN, OXYCODONE HCL/ACETAMINOPHEN,  
PEGINTERFERON ALFA-2A, PEGINTERFERON ALFA-2B, PENTAZOCINE  
HCL/ACETAMINOPHEN, PHENYLEPHRINE HCL/ACETAMINOPHEN,  
PHENYLEPHRINE HCL/ACETAMINOPHEN/CAFFEINE, PHENYLEPHRINE  
HCL/ACETAMINOPHEN/CHLORPHENIRAMINE, PHENYLEPHRINE  
HCL/ACETAMINOPHEN/DEXBROMPHENIRAMINE MALEATE,  
PHENYLEPHRINE HCL/ACETAMINOPHEN/DOXYLAMINE SUCCINATE,  
PHENYLEPHRINE HCL/ACETAMINOPHEN/PHENIRAMINE, PHENYLEPHRINE  
HCL/ACETAMINOPHEN/PYRILAMINE/CHLORPHENIRAMINE,  
PHENYLEPHRINE HCL/CODEINE PHOSPHATE/ACETAMINOPHEN/GUAIFEN,  
PHENYLEPHRINE HCL/CODEINE/ACETAMINOPHEN/CHLORPHENIRAMINE,  
PHENYLEPHRINE HCL/DEXTROMETHORPHAN  
HBR/ACETAMINOPHEN/GUAIFEN, PHENYLEPHRINE  
HCL/SALICYLAMIDE/ACETAMINOPHEN/CHLORPHENIR,  
PHENYLEPHRINE/ACETAMINOPHEN/DIPHENHYDRAMINE/CHLORPHENIRA  
MINE,  
PHENYLEPHRINE/ACETAMINOPHEN/PHENYLTOLOXAMINE/CHLORPHENIR  
AMIN, PHENYLEPHRINE/HYDROCODONE  
BIT/ACETAMINOPHEN/CHLORPHENIRAMINE, PHENYLPROPANOLAMINE  
HCL/ACETAMINOPHEN, PHENYLPROPANOLAMINE  
HCL/ACETAMINOPHEN/BROMPHENIRAMINE, PHENYLPROPANOLAMINE  
HCL/ACETAMINOPHEN/CHLORPHENIR/CAFFEINE,  
PHENYLPROPANOLAMINE HCL/ACETAMINOPHEN/CHLORPHENIRAMINE,  
PHENYLPROPANOLAMINE HCL/ACETAMINOPHEN/PHENYLTOLOXAMINE,  
PROPOXYPHENE HCL/ACETAMINOPHEN, PROPOXYPHENE  
NAPSYLATE/ACETAMINOPHEN, PROPRANOLOL  
HCL/HYDROCHLOROTHIAZIDE, PSEUDOEPHEDRINE HCL/ACETAMINOPHEN,  
PSEUDOEPHEDRINE HCL/ACETAMINOPHEN/BROMPHENIRAMINE,  
PSEUDOEPHEDRINE HCL/ACETAMINOPHEN/CHLORPHENIRAMINE,  
PSEUDOEPHEDRINE HCL/ACETAMINOPHEN/DEXBROMPHENIRAMINE,  
PSEUDOEPHEDRINE HCL/ACETAMINOPHEN/DEXCHLORPHENIRAMINE,  
PSEUDOEPHEDRINE HCL/ACETAMINOPHEN/DIPHENHYDRAMINE,  
PSEUDOEPHEDRINE HCL/ACETAMINOPHEN/DOXYLAMINE SUCCINATE,  
PSEUDOEPHEDRINE HCL/ACETAMINOPHEN/DP-  
HYDRAMINE/CHLORPHENIR, PSEUDOEPHEDRINE HCL/CODEINE  
PHOSPHATE/ACETAMINOPHEN/GUAIFEN, QUINAPRIL  
HCL/HYDROCHLOROTHIAZIDE, RESERPINE/HYDROCHLOROTHIAZIDE,  
RIBAVIRIN/INTERFERON ALFA-2B,RECOMB., RIFAMPIN,  
RIFAMPIN/ISONIAZID, RIFAMPIN/ISONIAZID/PYRAZINAMIDE,  
SALICYLAMIDE/ACETAMINOPHEN,  
SALICYLAMIDE/ACETAMINOPHEN/CAFFEINE,  
SALICYLAMIDE/ACETAMINOPHEN/ETHAVERINE,  
SALICYLAMIDE/ACETAMINOPHEN/PHENYLTOLOXAMINE,  
SALICYLAMIDE/ACETAMINOPHEN/PHENYLTOLOXAMINE/CAFFEINE,  
SPIRONOLACTONE/HYDROCHLOROTHIAZIDE,  
TELMISARTAN/HYDROCHLOROTHIAZIDE, TIMOLOL  
MALEATE/HYDROCHLOROTHIAZIDE, TRAMADOL HCL/ACETAMINOPHEN,  
TRIAMTERENE/HYDROCHLOROTHIAZIDE, TRIPROLIDINE

HCL/PSEUDOEPHEDRINE  
VALSARTAN/HYDROCHLOROTHIAZIDE }

HCL/ACETAMINOPHEN,

- ABACAVIR SULFATE/LAMIVUDINE
- ABACAVIR SULFATE/LAMIVUDINE/ZIDOVUDINE
- ACETAMINOPHEN
- ACETAMINOPHEN WITH CODEINE PHOSPHATE
- ACETAMINOPHEN/BROMELAINS
- ACETAMINOPHEN/CAFFEINE
- ACETAMINOPHEN/CALCIUM CARBONATE
- ACETAMINOPHEN/CALCIUM CARBONATE/CAFFEINE/GLYCINE
- ACETAMINOPHEN/CALCIUM CARBONATE/MAGNESIUM/CAFFEINE/CALCIUM
- ACETAMINOPHEN/CHLORPHENIRAMINE MALEATE
- ACETAMINOPHEN/DEXBROMPHENIRAMINE MALEATE
- ACETAMINOPHEN/DIPHENHYDRAMINE CITRATE
- ACETAMINOPHEN/DIPHENHYDRAMINE HCL
- ACETAMINOPHEN/MAGNESIUM SALICYLATE/PAMABROM
- ACETAMINOPHEN/MELATONIN
- ACETAMINOPHEN/PAMABROM
- ACETAMINOPHEN/PAMABROM/MAGNESIUM/VITAMIN E/FA/VIT BCOMP&C
- ACETAMINOPHEN/PAMABROM/PYRIDOXINE
- ACETAMINOPHEN/PAMABROM/VITAMIN E
- ACETAMINOPHEN/PHENYLTOLOXAMINE CIT
- ACETAMINOPHEN/PHENYLTOLOXAMINE CIT/CAFFEINE
- ACETAMINOPHEN/PYRILAMINE MALEATE
- ACETAMINOPHEN/PYRILAMINE MALEATE/CAFFEINE
- ACETAMINOPHEN/PYRILAMINE MALEATE/PAMABROM
- ACETAMINOPHEN/SODIUM BICARBONATE/CITRIC ACID
- ALISKIREN HEMIFUMARATE/AMLODIPINE/HYDROCHLOROTHIAZIDE
- ALISKIREN HEMIFUMARATE/HYDROCHLOROTHIAZIDE
- AMILORIDE HCL/HYDROCHLOROTHIAZIDE
- AMLODIPINE BESYLATE/VALSARTAN/HYDROCHLOROTHIAZIDE
- ASPIRIN/ACETAMINOPHEN
- ASPIRIN/ACETAMINOPHEN/CAFFEINE
- ASPIRIN/ACETAMINOPHEN/CAFFEINE/CALCIUM
- ASPIRIN/ACETAMINOPHEN/CAFFEINE/POTASSIUM
- ASPIRIN/ACETAMINOPHEN/CALCIUM CARBONATE
- ASPIRIN/ACETAMINOPHEN/MAGNESIUM/ALUMINUM HYDROXIDE/CAFFEINE
- ASPIRIN/SALICYLAMIDE/ACETAMINOPHEN/CAFFEINE
- BENAZEPRIL HCL/HYDROCHLOROTHIAZIDE
- BISOPROLOL FUMARATE/HYDROCHLOROTHIAZIDE
- BUTALBITAL/ACETAMINOPHEN
- BUTALBITAL/ACETAMINOPHEN/CAFFEINE
- BUTALBITAL/ACETAMINOPHEN/CAFFEINE/CODEINE PHOSPHATE
- CANDESARTAN CILEXETIL/HYDROCHLOROTHIAZIDE
- CAPTOPRIL/HYDROCHLOROTHIAZIDE
- CARBAMAZEPINE
- CHLORPHENIRAMINE MALEATE/CODEINE PHOSPHATE/ACETAMINOPHEN
- CHLORPHENIRAMINE/DEXTROMETHORPHAN/ACETAMINOPHEN/GUAIFENESIN

- CINNAMEDRINE HCL/ACETAMINOPHEN/PYRILAMINE/PAMABROM
- CISPLATIN
- CODEINE/ASPIRIN/SALICYLAMIDE/ACETAMINOPHEN/CAFFEINE
- DESERPIDINE/HYDROCHLOROTHIAZIDE
- DEXTROMETHORPHAN HBR/ACETAMINOPHEN
- DEXTROMETHORPHAN HBR/ACETAMINOPHEN/CHLORPHENIRAMINE MALEATE
- DEXTROMETHORPHAN HBR/ACETAMINOPHEN/DIPHENHYDRAMINE HCL
- DEXTROMETHORPHAN HBR/ACETAMINOPHEN/DOXYLAMINE
- DEXTROMETHORPHAN HBR/P-EPHED HCL/ACETAMINOPHEN/DOXYLAMINE
- DEXTROMETHORPHAN HBR/P-EPHED HCL/ACETAMINOPHEN/DP-HYDRAMINE
- DEXTROMETHORPHAN HBR/PHENYLEPHRINE HCL/ACETAMINOPHEN
- DEXTROMETHORPHAN HBR/PHENYLEPHRINE/ACETAMINOPHEN/CHLORPHENIR
- DEXTROMETHORPHAN HBR/PHENYLEPHRINE/ACETAMINOPHEN/DOXYLAMINE
- DEXTROMETHORPHAN HBR/PHENYLEPHRINE/ACETAMINOPHEN/PYRILAMINE
- DEXTROMETHORPHAN HBR/PPA BIT/ACETAMINOPHEN/CHLORPHENIRAMINE
- DEXTROMETHORPHAN HBR/PPA HCL/ACETAMINOPHEN/CHLORPHENIRAMINE
- DEXTROMETHORPHAN HBR/PPA HCL/ACETAMINOPHEN/PYRILAMINE
- DEXTROMETHORPHAN HBR/PSEUDOEPHEDRINE HCL/ACETAMINOPHEN
- DEXTROMETHORPHAN HBR/PSEUDOEPHEDRINE HCL/ACETAMINOPHEN/PYRIL
- DEXTROMETHORPHAN/PSEUDOEPHEDRINE/ACETAMINOPHEN/BROMPHENIRAM
- DEXTROMETHORPHAN/PSEUDOEPHEDRINE/ACETAMINOPHEN/CHLORPHENIR
- DIHYDROCODEINE BITARTRATE/ACETAMINOPHEN/CAFFEINE
- DIPHENHYDRAMINE HCL/PHENYLEPHRINE HCL/ACETAMINOPHEN
- DIPHENHYDRAMINE HCL/PHENYLEPHRINE HCL/ACETAMINOPHEN/GUAIFEN
- DIPHENHYDRAMINE/PHENYLEPHRINE/DEXTRMETHORPH/ACETAMINOPHEN/GG
- DOXYLAMINE/PHENYLEPHRINE/DEXTROMETHORPHAN/ACETAMINOPHEN/GG
- ENALAPRIL MALEATE
- ENALAPRIL MALEATE/FELODIPINE
- ENALAPRIL MALEATE/HYDROCHLOROTHIAZIDE
- ENALAPRILAT DIHYDRATE
- EPROSARTAN MESYLATE/HYDROCHLOROTHIAZIDE
- ERYTHROMYCIN BASE
- ERYTHROMYCIN BASE/BENZOYL PEROXIDE
- ERYTHROMYCIN BASE/ETHYL ALCOHOL
- ERYTHROMYCIN ESTOLATE
- ERYTHROMYCIN ETHYLSUCCINATE
- ERYTHROMYCIN ETHYLSUCCINATE/SULFISOXAZOLE ACETYL
- ERYTHROMYCIN GLUCEPTATE
- ERYTHROMYCIN LACTOBIONATE
- ERYTHROMYCIN STEARATE
- FOSINOPRIL SODIUM/HYDROCHLOROTHIAZIDE
- GUAIFENESIN/ACETAMINOPHEN
- GUAIFENESIN/DEXTROMETHORPHAN HBR/ACETAMINOPHEN
- GUAIFENESIN/PHENYLEPHRINE HCL/ACETAMINOPHEN
- GUAIFENESIN/PHENYLEPHRINE HCL/ACETAMINOPHEN/CAFFEINE
- GUAIFENESIN/PHENYLPROPANOLAMINE HCL/ACETAMINOPHEN



- GUAIFENESIN/PHENYLPROPANOLAMINE HCL/ACETAMINOPHEN/CAFFEINE
- GUAIFENESIN/PSEUDOEPHEDRINE HCL/ACETAMINOPHEN
- GUANETHIDINE SULFATE/HYDROCHLOROTHIAZIDE
- HYDRALAZINE HCL/HYDROCHLOROTHIAZIDE
- HYDRALAZINE HCL/RESERPINE/HYDROCHLOROTHIAZIDE
- HYDROCHLOROTHIAZIDE
- HYDROCODONE BITARTRATE/ACETAMINOPHEN
- HYDROCODONE BITARTRATE/ACETAMINOPHEN/DIETARY SUPPLEMENT #11
- INTERFERON ALFA-2A,RECOMB.
- INTERFERON ALFA-2B,RECOMB.
- INTERFERON ALFA-N3
- INTERFERON ALFACON-1
- INTERFERON BETA-1A
- INTERFERON BETA-1A/ALBUMIN HUMAN
- INTERFERON BETA-1B
- INTERFERON GAMMA-1B,RECOMB.
- IRBESARTAN/HYDROCHLOROTHIAZIDE
- ISOMETHEPTENE MUCATE/CAFFEINE/ACETAMINOPHEN
- ISOMETHEPTENE MUCATE/DICHLORALPHENAZONE/ACETAMINOPHEN
- LAMIVUDINE
- LAMIVUDINE/ZIDOVUDINE
- LISINOPRIL/HYDROCHLOROTHIAZIDE
- LOSARTAN POTASSIUM/HYDROCHLOROTHIAZIDE
- MAGNESIUM SALICYLATE/ACETAMINOPHEN
- MAGNESIUM SALICYLATE/ACETAMINOPHEN/CAFFEINE
- MAGNESIUM SALICYLATE/ACETAMINOPHEN/PHENYLTOLOXAMINE/CAFFEINE
- METHYLDOPA/HYDROCHLOROTHIAZIDE
- METOPROLOL SUCCINATE/HYDROCHLOROTHIAZIDE
- METOPROLOL TARTRATE/HYDROCHLOROTHIAZIDE
- MOEXIPRIL HCL/HYDROCHLOROTHIAZIDE
- OCTREOTIDE ACETATE
- OLMESARTAN MEDOXOMIL/AMLODIPINE BESYLATE/HYDROCHLOROTHIAZIDE
- OLMESARTAN MEDOXOMIL/HYDROCHLOROTHIAZIDE
- ORPHENADRINE CITRATE/ACETAMINOPHEN
- OXYCODONE HCL/ACETAMINOPHEN
- PEGINTERFERON ALFA-2A
- PEGINTERFERON ALFA-2B
- PENTAZOCINE HCL/ACETAMINOPHEN
- PHENYLEPHRINE HCL/ACETAMINOPHEN
- PHENYLEPHRINE HCL/ACETAMINOPHEN/CAFFEINE
- PHENYLEPHRINE HCL/ACETAMINOPHEN/CHLORPHENIRAMINE
- PHENYLEPHRINE HCL/ACETAMINOPHEN/DEXBROMPHENIRAMINE MALEATE
- PHENYLEPHRINE HCL/ACETAMINOPHEN/DOXYLAMINE SUCCINATE
- PHENYLEPHRINE HCL/ACETAMINOPHEN/PHENIRAMINE
- PHENYLEPHRINE HCL/ACETAMINOPHEN/PYRILAMINE/CHLORPHENIRAMINE
- PHENYLEPHRINE HCL/CODEINE PHOSPHATE/ACETAMINOPHEN/GUAIFEN

- PHENYLEPHRINE HCL/CODEINE/ACETAMINOPHEN/CHLORPHENIRAMINE
- PHENYLEPHRINE HCL/DEXTROMETHORPHAN HBR/ACETAMINOPHEN/GUAIFEN
- PHENYLEPHRINE HCL/SALICYLAMIDE/ACETAMINOPHEN/CHLORPHENIR
- PHENYLEPHRINE/ACETAMINOPHEN/DIPHENHYDRAMINE/CHLORPHENIRAMINE
- PHENYLEPHRINE/ACETAMINOPHEN/PHENYLTOLOXAMINE/CHLORPHENIRAMIN
- PHENYLEPHRINE/HYDROCODONE BIT/ACETAMINOPHEN/CHLORPHENIRAMINE
- PHENYLPROPANOLAMINE HCL/ACETAMINOPHEN
- PHENYLPROPANOLAMINE HCL/ACETAMINOPHEN/BROMPHENIRAMINE
- PHENYLPROPANOLAMINE HCL/ACETAMINOPHEN/CHLORPHENIR/CAFFEINE
- PHENYLPROPANOLAMINE HCL/ACETAMINOPHEN/CHLORPHENIRAMINE
- PHENYLPROPANOLAMINE HCL/ACETAMINOPHEN/PHENYLTOLOXAMINE
- PROPOXYPHENE HCL/ACETAMINOPHEN
- PROPOXYPHENE NAPSYLATE/ACETAMINOPHEN
- PROPRANOLOL HCL/HYDROCHLOROTHIAZIDE
- PSEUDOEPHEDRINE HCL/ACETAMINOPHEN
- PSEUDOEPHEDRINE HCL/ACETAMINOPHEN/BROMPHENIRAMINE
- PSEUDOEPHEDRINE HCL/ACETAMINOPHEN/CHLORPHENIRAMINE
- PSEUDOEPHEDRINE HCL/ACETAMINOPHEN/DEXBROMPHENIRAMINE
- PSEUDOEPHEDRINE HCL/ACETAMINOPHEN/DEXCHLORPHENIRAMINE
- PSEUDOEPHEDRINE HCL/ACETAMINOPHEN/DIPHENHYDRAMINE
- PSEUDOEPHEDRINE HCL/ACETAMINOPHEN/DOXYLAMINE SUCCINATE
- PSEUDOEPHEDRINE HCL/ACETAMINOPHEN/DP-HYDRAMINE/CHLORPHENIR
- PSEUDOEPHEDRINE HCL/CODEINE PHOSPHATE/ACETAMINOPHEN/GUAIFEN
- QUINAPRIL HCL/HYDROCHLOROTHIAZIDE
- RESERPINE/HYDROCHLOROTHIAZIDE
- RIBAVIRIN/INTERFERON ALFA-2B,RECOMB.
- RIFAMPIN
- RIFAMPIN/ISONIAZID
- RIFAMPIN/ISONIAZID/PYRAZINAMIDE
- SALICYLAMIDE/ACETAMINOPHEN
- SALICYLAMIDE/ACETAMINOPHEN/CAFFEINE
- SALICYLAMIDE/ACETAMINOPHEN/ETHAVERINE
- SALICYLAMIDE/ACETAMINOPHEN/PHENYLTOLOXAMINE
- SALICYLAMIDE/ACETAMINOPHEN/PHENYLTOLOXAMINE/CAFFEINE
- SPIRONOLACTONE/HYDROCHLOROTHIAZIDE
- TELMISARTAN/HYDROCHLOROTHIAZIDE
- TIMOLOL MALEATE/HYDROCHLOROTHIAZIDE
- TRAMADOL HCL/ACETAMINOPHEN
- TRIAMTERENE/HYDROCHLOROTHIAZIDE
- TRIPROLIDINE HCL/PSEUDOEPHEDRINE HCL/ACETAMINOPHEN
- VALSARTAN/HYDROCHLOROTHIAZIDE

### *History of CHF*

This event measure was defined as occurring when any of the following criteria were met:

- The occurrence of **Inpatient Confinement** with the following attributes:

- **ICD-9 Diagnosis Code (any position)** is any of: { 428, 428.0, 428.1, 428.2, 428.20, 428.21, 428.22, 428.23, 428.3, 428.30, 428.31, 428.32, 428.33, 428.4, 428.40, 428.41, 428.42, 428.43, 428.9 }
    - 428 - HEART FAILURE
    - 428.0 - CONGESTIVE HEART FAILURE UNSPECIFIED
    - 428.1 - LEFT HEART FAILURE
    - 428.2 - SYSTOLIC HEART FAILURE
    - 428.20 - UNSPECIFIED SYSTOLIC HEART FAILURE
    - 428.21 - ACUTE SYSTOLIC HEART FAILURE
    - 428.22 - CHRONIC SYSTOLIC HEART FAILURE
    - 428.23 - ACUTE ON CHRONIC SYSTOLIC HEART FAILURE
    - 428.3 - DIASTOLIC HEART FAILURE
    - 428.30 - UNSPECIFIED DIASTOLIC HEART FAILURE
    - 428.31 - ACUTE DIASTOLIC HEART FAILURE
    - 428.32 - CHRONIC DIASTOLIC HEART FAILURE
    - 428.33 - ACUTE ON CHRONIC DIASTOLIC HEART FAILURE
    - 428.4 - COMBINED SYSTOLIC AND DIASTOLIC HEART FAILURE
    - 428.40 - UNSPECIFIED COMBINED SYSTOLIC AND DIASTOLIC HEART FAILURE
    - 428.41 - ACUTE COMBINED SYSTOLIC AND DIASTOLIC HEART FAILURE
    - 428.42 - CHRONIC COMBINED SYSTOLIC AND DIASTOLIC HEART FAILURE
    - 428.43 - ACUTE ON CHRONIC COMBINED SYSTOLIC AND DIASTOLIC HEART FAILURE
    - 428.9 - HEART FAILURE UNSPECIFIED
- The occurrence of **Medical Services** with the following attributes:
  - **ICD-9 Diagnosis Code (any position)** is any of: { 428, 428.0, 428.1, 428.2, 428.20, 428.21, 428.22, 428.23, 428.3, 428.30, 428.31, 428.32, 428.33, 428.4, 428.40, 428.41, 428.42, 428.43, 428.9 }

- 428 - HEART FAILURE
- 428.0 - CONGESTIVE HEART FAILURE UNSPECIFIED
- 428.1 - LEFT HEART FAILURE
- 428.2 - SYSTOLIC HEART FAILURE
- 428.20 - UNSPECIFIED SYSTOLIC HEART FAILURE
- 428.21 - ACUTE SYSTOLIC HEART FAILURE
- 428.22 - CHRONIC SYSTOLIC HEART FAILURE
- 428.23 - ACUTE ON CHRONIC SYSTOLIC HEART FAILURE
- 428.3 - DIASTOLIC HEART FAILURE
- 428.30 - UNSPECIFIED DIASTOLIC HEART FAILURE
- 428.31 - ACUTE DIASTOLIC HEART FAILURE
- 428.32 - CHRONIC DIASTOLIC HEART FAILURE
- 428.33 - ACUTE ON CHRONIC DIASTOLIC HEART FAILURE
- 428.4 - COMBINED SYSTOLIC AND DIASTOLIC HEART FAILURE
- 428.40 - UNSPECIFIED COMBINED SYSTOLIC AND DIASTOLIC HEART FAILURE
- 428.41 - ACUTE COMBINED SYSTOLIC AND DIASTOLIC HEART FAILURE
- 428.42 - CHRONIC COMBINED SYSTOLIC AND DIASTOLIC HEART FAILURE
- 428.43 - ACUTE ON CHRONIC COMBINED SYSTOLIC AND DIASTOLIC HEART FAILURE
- 428.9 - HEART FAILURE UNSPECIFIED

### *History of ischemic heart disease*

This event measure was defined as occurring when any of the following criteria were met:

- The occurrence of **Inpatient Confinement** with the following attributes:
  - **ICD-9 Diagnosis Code (any position)** is any of: { 410, 411, 412, 413, 414, 410.0, 410.00, 410.01, 410.02, 410.1, 410.10, 410.11, 410.12, 410.2, 410.20, 410.21, 410.22, 410.3, 410.30, 410.31, 410.32, 410.4, 410.40, 410.41, 410.42, 410.5, 410.50, 410.51, 410.52, 410.6, 410.60, 410.61, 410.62, 410.7, 410.70, 410.71, 410.72, 410.8, 410.80, 410.81, 410.82, 410.9, 410.90, 410.91, 410.92, 411.0, 411.1, 411.8, 411.81, 411.89, 413.0, 413.1, 413.9, 414.0, 414.00, 414.01, 414.02, 414.03, 414.04, 414.05, 414.06, 414.07, 414.1, 414.10, 414.11, 414.12, 414.19, 414.2, 414.3, 414.4, 414.8, 414.9 }

- 410 - ACUTE MYOCARDIAL INFARCTION
- 411 - OTHER ACUTE AND SUBACUTE FORMS OF ISCHEMIC HEART DISEASE
- 412 - OLD MYOCARDIAL INFARCTION
- 413 - ANGINA PECTORIS
- 414 - OTHER FORMS OF CHRONIC ISCHEMIC HEART DISEASE
- 410.0 - ACUTE MYOCARDIAL INFARCTION OF ANTEROLATERAL WALL
- 410.00 - ACUTE MYOCARDIAL INFARCTION OF ANTEROLATERAL WALL EPISODE OF CARE UNSPECIFIED
- 410.01 - ACUTE MYOCARDIAL INFARCTION OF ANTEROLATERAL WALL INITIAL EPISODE OF CARE
- 410.02 - ACUTE MYOCARDIAL INFARCTION OF ANTEROLATERAL WALL SUBSEQUENT EPISODE OF CARE
- 410.1 - ACUTE MYOCARDIAL INFARCTION OF OTHER ANTERIOR WALL
- 410.10 - ACUTE MYOCARDIAL INFARCTION OF OTHER ANTERIOR WALL EPISODE OF CARE UNSPECIFIED
- 410.11 - ACUTE MYOCARDIAL INFARCTION OF OTHER ANTERIOR WALL INITIAL EPISODE OF CARE
- 410.12 - ACUTE MYOCARDIAL INFARCTION OF OTHER ANTERIOR WALL SUBSEQUENT EPISODE OF CARE
- 410.2 - ACUTE MYOCARDIAL INFARCTION OF INFEROLATERAL WALL
- 410.20 - ACUTE MYOCARDIAL INFARCTION OF INFEROLATERAL WALL EPISODE OF CARE UNSPECIFIED
- 410.21 - ACUTE MYOCARDIAL INFARCTION OF INFEROLATERAL WALL INITIAL EPISODE OF CARE
- 410.22 - ACUTE MYOCARDIAL INFARCTION OF INFEROLATERAL WALL SUBSEQUENT EPISODE OF CARE
- 410.3 - ACUTE MYOCARDIAL INFARCTION OF INFEROPOSTERIOR WALL
- 410.30 - ACUTE MYOCARDIAL INFARCTION OF INFEROPOSTERIOR WALL EPISODE OF CARE UNSPECIFIED
- 410.31 - ACUTE MYOCARDIAL INFARCTION OF INFEROPOSTERIOR WALL INITIAL EPISODE OF CARE
- 410.32 - ACUTE MYOCARDIAL INFARCTION OF INFEROPOSTERIOR WALL SUBSEQUENT EPISODE OF CARE
- 410.4 - ACUTE MYOCARDIAL INFARCTION OF OTHER INFERIOR WALL
- 410.40 - ACUTE MYOCARDIAL INFARCTION OF OTHER INFERIOR WALL EPISODE OF CARE UNSPECIFIED
- 410.41 - ACUTE MYOCARDIAL INFARCTION OF OTHER INFERIOR WALL INITIAL EPISODE OF CARE
- 410.42 - ACUTE MYOCARDIAL INFARCTION OF OTHER INFERIOR WALL SUBSEQUENT EPISODE OF CARE
- 410.5 - ACUTE MYOCARDIAL INFARCTION OF OTHER LATERAL WALL
- 410.50 - ACUTE MYOCARDIAL INFARCTION OF OTHER LATERAL WALL EPISODE OF CARE UNSPECIFIED
- 410.51 - ACUTE MYOCARDIAL INFARCTION OF OTHER LATERAL WALL INITIAL EPISODE OF CARE
- 410.52 - ACUTE MYOCARDIAL INFARCTION OF OTHER LATERAL WALL SUBSEQUENT EPISODE OF CARE
- 410.6 - TRUE POSTERIOR WALL INFARCTION

- 410.60 - TRUE POSTERIOR WALL INFARCTION EPISODE OF CARE UNSPECIFIED
- 410.61 - TRUE POSTERIOR WALL INFARCTION INITIAL EPISODE OF CARE
- 410.62 - TRUE POSTERIOR WALL INFARCTION SUBSEQUENT EPISODE OF CARE
- 410.7 - SUBENDOCARDIAL INFARCTION
- 410.70 - SUBENDOCARDIAL INFARCTION EPISODE OF CARE UNSPECIFIED
- 410.71 - SUBENDOCARDIAL INFARCTION INITIAL EPISODE OF CARE
- 410.72 - SUBENDOCARDIAL INFARCTION SUBSEQUENT EPISODE OF CARE
- 410.8 - ACUTE MYOCARDIAL INFARCTION OF OTHER SPECIFIED SITES
- 410.80 - ACUTE MYOCARDIAL INFARCTION OF OTHER SPECIFIED SITES EPISODE OF CARE UNSPECIFIED
- 410.81 - ACUTE MYOCARDIAL INFARCTION OF OTHER SPECIFIED SITES INITIAL EPISODE OF CARE
- 410.82 - ACUTE MYOCARDIAL INFARCTION OF OTHER SPECIFIED SITES SUBSEQUENT EPISODE OF CARE
- 410.9 - ACUTE MYOCARDIAL INFARCTION OF UNSPECIFIED SITE
- 410.90 - ACUTE MYOCARDIAL INFARCTION OF UNSPECIFIED SITE EPISODE OF CARE UNSPECIFIED
- 410.91 - ACUTE MYOCARDIAL INFARCTION OF UNSPECIFIED SITE INITIAL EPISODE OF CARE
- 410.92 - ACUTE MYOCARDIAL INFARCTION OF UNSPECIFIED SITE SUBSEQUENT EPISODE OF CARE
- 411.0 - POSTMYOCARDIAL INFARCTION SYNDROME
- 411.1 - INTERMEDIATE CORONARY SYNDROME
- 411.8 - OTHER ACUTE AND SUBACUTE FORMS OF ISCHEMIC HEART DISEASE
- 411.81 - ACUTE CORONARY OCCLUSION WITHOUT MYOCARDIAL INFARCTION
- 411.89 - OTHER ACUTE AND SUBACUTE FORMS OF ISCHEMIC HEART DISEASE OTHER
- 413.0 - ANGINA DECUBITUS
- 413.1 - PRINZMETAL ANGINA
- 413.9 - OTHER AND UNSPECIFIED ANGINA PECTORIS
- 414.0 - CORONARY ATHEROSCLEROSIS
- 414.00 - CORONARY ATHEROSCLEROSIS OF UNSPECIFIED TYPE OF VESSEL NATIVE OR GRAFT
- 414.01 - CORONARY ATHEROSCLEROSIS OF NATIVE CORONARY ARTERY
- 414.02 - CORONARY ATHEROSCLEROSIS OF AUTOLOGOUS VEIN BYPASS GRAFT
- 414.03 - CORONARY ATHEROSCLEROSIS OF NONAUTOLOGOUS BIOLOGICAL BYPASS GRAFT
- 414.04 - CORONARY ATHEROSCLEROSIS OF ARTERY BYPASS GRAFT
- 414.05 - CORONARY ATHEROSCLEROSIS OF UNSPECIFIED BYPASS GRAFT
- 414.06 - CORONARY ATHEROSCLEROSIS OF NATIVE CORONARY ARTERY OF TRANSPLANTED HEART
- 414.07 - CORONARY ATHEROSCLEROSIS OF BYPASS GRAFT (ARTERY) (VEIN) OF TRANSPLANTED HEART
- 414.1 - ANEURYSM AND DISSECTION OF HEART
- 414.10 - ANEURYSM OF HEART (WALL)
- 414.11 - ANEURYSM OF CORONARY VESSELS
- 414.12 - DISSECTION OF CORONARY ARTERY

- 414.19 - OTHER ANEURYSM OF HEART
  - 414.2 - CHRONIC TOTAL OCCLUSION OF CORONARY ARTERY
  - 414.3 - CORONARY ATHEROSCLEROSIS DUE TO LIPID RICH PLAQUE
  - 414.4 - CORONARY ATHEROSCLEROSIS DUE TO CALCIFIED CORONARY LESION
  - 414.8 - OTHER SPECIFIED FORMS OF CHRONIC ISCHEMIC HEART DISEASE
  - 414.9 - CHRONIC ISCHEMIC HEART DISEASE UNSPECIFIED
- The occurrence of **Medical Services** with the following attributes:
    - **ICD-9 Diagnosis Code (any position)** is any of: { 410, 411, 412, 413, 414, 410.0, 410.00, 410.01, 410.02, 410.1, 410.10, 410.11, 410.12, 410.2, 410.20, 410.21, 410.22, 410.3, 410.30, 410.31, 410.32, 410.4, 410.40, 410.41, 410.42, 410.5, 410.50, 410.51, 410.52, 410.6, 410.60, 410.61, 410.62, 410.7, 410.70, 410.71, 410.72, 410.8, 410.80, 410.81, 410.82, 410.9, 410.90, 410.91, 410.92, 411.0, 411.1, 411.8, 411.81, 411.89, 413.0, 413.1, 413.9, 414.0, 414.00, 414.01, 414.02, 414.03, 414.04, 414.05, 414.06, 414.07, 414.1, 414.10, 414.11, 414.12, 414.19, 414.2, 414.3, 414.4, 414.8, 414.9 }

- 410 - ACUTE MYOCARDIAL INFARCTION
- 411 - OTHER ACUTE AND SUBACUTE FORMS OF ISCHEMIC HEART DISEASE
- 412 - OLD MYOCARDIAL INFARCTION
- 413 - ANGINA PECTORIS
- 414 - OTHER FORMS OF CHRONIC ISCHEMIC HEART DISEASE
- 410.0 - ACUTE MYOCARDIAL INFARCTION OF ANTEROLATERAL WALL
- 410.00 - ACUTE MYOCARDIAL INFARCTION OF ANTEROLATERAL WALL EPISODE OF CARE UNSPECIFIED
- 410.01 - ACUTE MYOCARDIAL INFARCTION OF ANTEROLATERAL WALL INITIAL EPISODE OF CARE
- 410.02 - ACUTE MYOCARDIAL INFARCTION OF ANTEROLATERAL WALL SUBSEQUENT EPISODE OF CARE
- 410.1 - ACUTE MYOCARDIAL INFARCTION OF OTHER ANTERIOR WALL
- 410.10 - ACUTE MYOCARDIAL INFARCTION OF OTHER ANTERIOR WALL EPISODE OF CARE UNSPECIFIED
- 410.11 - ACUTE MYOCARDIAL INFARCTION OF OTHER ANTERIOR WALL INITIAL EPISODE OF CARE
- 410.12 - ACUTE MYOCARDIAL INFARCTION OF OTHER ANTERIOR WALL SUBSEQUENT EPISODE OF CARE
- 410.2 - ACUTE MYOCARDIAL INFARCTION OF INFEROLATERAL WALL
- 410.20 - ACUTE MYOCARDIAL INFARCTION OF INFEROLATERAL WALL EPISODE OF CARE UNSPECIFIED
- 410.21 - ACUTE MYOCARDIAL INFARCTION OF INFEROLATERAL WALL INITIAL EPISODE OF CARE
- 410.22 - ACUTE MYOCARDIAL INFARCTION OF INFEROLATERAL WALL SUBSEQUENT EPISODE OF CARE
- 410.3 - ACUTE MYOCARDIAL INFARCTION OF INFEROPOSTERIOR WALL
- 410.30 - ACUTE MYOCARDIAL INFARCTION OF INFEROPOSTERIOR WALL EPISODE OF CARE UNSPECIFIED
- 410.31 - ACUTE MYOCARDIAL INFARCTION OF INFEROPOSTERIOR WALL INITIAL EPISODE OF CARE
- 410.32 - ACUTE MYOCARDIAL INFARCTION OF INFEROPOSTERIOR WALL SUBSEQUENT EPISODE OF CARE
- 410.4 - ACUTE MYOCARDIAL INFARCTION OF OTHER INFERIOR WALL
- 410.40 - ACUTE MYOCARDIAL INFARCTION OF OTHER INFERIOR WALL EPISODE OF CARE UNSPECIFIED
- 410.41 - ACUTE MYOCARDIAL INFARCTION OF OTHER INFERIOR WALL INITIAL EPISODE OF CARE
- 410.42 - ACUTE MYOCARDIAL INFARCTION OF OTHER INFERIOR WALL SUBSEQUENT EPISODE OF CARE
- 410.5 - ACUTE MYOCARDIAL INFARCTION OF OTHER LATERAL WALL
- 410.50 - ACUTE MYOCARDIAL INFARCTION OF OTHER LATERAL WALL EPISODE OF CARE UNSPECIFIED
- 410.51 - ACUTE MYOCARDIAL INFARCTION OF OTHER LATERAL WALL INITIAL EPISODE OF CARE
- 410.52 - ACUTE MYOCARDIAL INFARCTION OF OTHER LATERAL WALL SUBSEQUENT EPISODE OF CARE
- 410.6 - TRUE POSTERIOR WALL INFARCTION



- 410.60 - TRUE POSTERIOR WALL INFARCTION EPISODE OF CARE UNSPECIFIED
- 410.61 - TRUE POSTERIOR WALL INFARCTION INITIAL EPISODE OF CARE
- 410.62 - TRUE POSTERIOR WALL INFARCTION SUBSEQUENT EPISODE OF CARE
- 410.7 - SUBENDOCARDIAL INFARCTION
- 410.70 - SUBENDOCARDIAL INFARCTION EPISODE OF CARE UNSPECIFIED
- 410.71 - SUBENDOCARDIAL INFARCTION INITIAL EPISODE OF CARE
- 410.72 - SUBENDOCARDIAL INFARCTION SUBSEQUENT EPISODE OF CARE
- 410.8 - ACUTE MYOCARDIAL INFARCTION OF OTHER SPECIFIED SITES
- 410.80 - ACUTE MYOCARDIAL INFARCTION OF OTHER SPECIFIED SITES EPISODE OF CARE UNSPECIFIED
- 410.81 - ACUTE MYOCARDIAL INFARCTION OF OTHER SPECIFIED SITES INITIAL EPISODE OF CARE
- 410.82 - ACUTE MYOCARDIAL INFARCTION OF OTHER SPECIFIED SITES SUBSEQUENT EPISODE OF CARE
- 410.9 - ACUTE MYOCARDIAL INFARCTION OF UNSPECIFIED SITE
- 410.90 - ACUTE MYOCARDIAL INFARCTION OF UNSPECIFIED SITE EPISODE OF CARE UNSPECIFIED
- 410.91 - ACUTE MYOCARDIAL INFARCTION OF UNSPECIFIED SITE INITIAL EPISODE OF CARE
- 410.92 - ACUTE MYOCARDIAL INFARCTION OF UNSPECIFIED SITE SUBSEQUENT EPISODE OF CARE
- 411.0 - POSTMYOCARDIAL INFARCTION SYNDROME
- 411.1 - INTERMEDIATE CORONARY SYNDROME
- 411.8 - OTHER ACUTE AND SUBACUTE FORMS OF ISCHEMIC HEART DISEASE
- 411.81 - ACUTE CORONARY OCCLUSION WITHOUT MYOCARDIAL INFARCTION
- 411.89 - OTHER ACUTE AND SUBACUTE FORMS OF ISCHEMIC HEART DISEASE OTHER
- 413.0 - ANGINA DECUBITUS
- 413.1 - PRINZMETAL ANGINA
- 413.9 - OTHER AND UNSPECIFIED ANGINA PECTORIS
- 414.0 - CORONARY ATHEROSCLEROSIS
- 414.00 - CORONARY ATHEROSCLEROSIS OF UNSPECIFIED TYPE OF VESSEL NATIVE OR GRAFT
- 414.01 - CORONARY ATHEROSCLEROSIS OF NATIVE CORONARY ARTERY
- 414.02 - CORONARY ATHEROSCLEROSIS OF AUTOLOGOUS VEIN BYPASS GRAFT
- 414.03 - CORONARY ATHEROSCLEROSIS OF NONAUTOLOGOUS BIOLOGICAL BYPASS GRAFT
- 414.04 - CORONARY ATHEROSCLEROSIS OF ARTERY BYPASS GRAFT
- 414.05 - CORONARY ATHEROSCLEROSIS OF UNSPECIFIED BYPASS GRAFT
- 414.06 - CORONARY ATHEROSCLEROSIS OF NATIVE CORONARY ARTERY OF TRANSPLANTED HEART
- 414.07 - CORONARY ATHEROSCLEROSIS OF BYPASS GRAFT (ARTERY) (VEIN) OF TRANSPLANTED HEART
- 414.1 - ANEURYSM AND DISSECTION OF HEART
- 414.10 - ANEURYSM OF HEART (WALL)
- 414.11 - ANEURYSM OF CORONARY VESSELS
- 414.12 - DISSECTION OF CORONARY ARTERY

- 414.19 - OTHER ANEURYSM OF HEART
- 414.2 - CHRONIC TOTAL OCCLUSION OF CORONARY ARTERY
- 414.3 - CORONARY ATHEROSCLEROSIS DUE TO LIPID RICH PLAQUE
- 414.4 - CORONARY ATHEROSCLEROSIS DUE TO CALCIFIED CORONARY LESION
- 414.8 - OTHER SPECIFIED FORMS OF CHRONIC ISCHEMIC HEART DISEASE
- 414.9 - CHRONIC ISCHEMIC HEART DISEASE UNSPECIFIED

### *Hyperlipidemia*

This event measure was defined as occurring when any of the following criteria were met:

- The occurrence of **Inpatient Confinement** with the following attributes:
  - **ICD-9 Diagnosis Code (any position)** is any of: { 272.2, 272.4, 272, 272.0, 272.1, 272.3, 272.5, 272.6, 272.7, 272.8, 272.9 }
    - 272.2 - MIXED HYPERLIPIDEMIA
    - 272.4 - OTHER AND UNSPECIFIED HYPERLIPIDEMIA
    - 272 - DISORDERS OF LIPOID METABOLISM
    - 272.0 - PURE HYPERCHOLESTEROLEMIA
    - 272.1 - PURE HYPERGLYCERIDEMIA
    - 272.3 - HYPERCHYLOMICRONEMIA
    - 272.5 - LIPOPROTEIN DEFICIENCIES
    - 272.6 - LIPODYSTROPHY
    - 272.7 - LIPIDOSES
    - 272.8 - OTHER DISORDERS OF LIPOID METABOLISM
    - 272.9 - UNSPECIFIED DISORDER OF LIPOID METABOLISM
- The occurrence of **Medical Services** with the following attributes:
  - **ICD-9 Diagnosis Code (any position)** is any of: { 272.2, 272.4, 272, 272.0, 272.1, 272.3, 272.5, 272.6, 272.7, 272.8, 272.9 }
    - 272.2 - MIXED HYPERLIPIDEMIA
    - 272.4 - OTHER AND UNSPECIFIED HYPERLIPIDEMIA
    - 272 - DISORDERS OF LIPOID METABOLISM
    - 272.0 - PURE HYPERCHOLESTEROLEMIA
    - 272.1 - PURE HYPERGLYCERIDEMIA
    - 272.3 - HYPERCHYLOMICRONEMIA
    - 272.5 - LIPOPROTEIN DEFICIENCIES
    - 272.6 - LIPODYSTROPHY
    - 272.7 - LIPIDOSES
    - 272.8 - OTHER DISORDERS OF LIPOID METABOLISM
    - 272.9 - UNSPECIFIED DISORDER OF LIPOID METABOLISM

### *Hypertension*

This event measure was defined as occurring when any of the following criteria were met:

- The occurrence of **Inpatient Confinement** with the following attributes:

- **ICD-9 Diagnosis Code (any position)** is any of: { 401, 401.0, 401.1, 401.9, 402, 402.0, 402.00, 402.01, 402.1, 402.10, 402.11, 402.9, 402.90, 402.91, 403, 403.0, 403.00, 403.01, 403.1, 403.10, 403.11, 403.9, 403.90, 403.91, 404, 404.0, 404.00, 404.01, 404.02, 404.03, 404.1, 404.10, 404.11, 404.12, 404.13, 404.9, 404.90, 404.91, 404.92, 405, 405.0, 405.01, 405.09, 405.1, 405.11, 405.19, 405.9, 405.91, 405.99, 437.2 }

- 401 - ESSENTIAL HYPERTENSION
- 401.0 - MALIGNANT ESSENTIAL HYPERTENSION
- 401.1 - BENIGN ESSENTIAL HYPERTENSION
- 401.9 - UNSPECIFIED ESSENTIAL HYPERTENSION
- 402 - HYPERTENSIVE HEART DISEASE
- 402.0 - MALIGNANT HYPERTENSIVE HEART DISEASE
- 402.00 - MALIGNANT HYPERTENSIVE HEART DISEASE WITHOUT HEART FAILURE
- 402.01 - MALIGNANT HYPERTENSIVE HEART DISEASE WITH HEART FAILURE
- 402.1 - BENIGN HYPERTENSIVE HEART DISEASE
- 402.10 - BENIGN HYPERTENSIVE HEART DISEASE WITHOUT HEART FAILURE
- 402.11 - BENIGN HYPERTENSIVE HEART DISEASE WITH HEART FAILURE
- 402.9 - UNSPECIFIED HYPERTENSIVE HEART DISEASE
- 402.90 - UNSPECIFIED HYPERTENSIVE HEART DISEASE WITHOUT HEART FAILURE
- 402.91 - UNSPECIFIED HYPERTENSIVE HEART DISEASE WITH HEART FAILURE
- 403 - HYPERTENSIVE CHRONIC KIDNEY DISEASE
- 403.0 - MALIGNANT HYPERTENSIVE KIDNEY DISEASE
- 403.00 - HYPERTENSIVE CHRONIC KIDNEY DISEASE MALIGNANT WITH CHRONIC KIDNEY DISEASE STAGE I THROUGH STAGE IV OR UNSPECIFIED
- 403.01 - HYPERTENSIVE CHRONIC KIDNEY DISEASE MALIGNANT WITH CHRONIC KIDNEY DISEASE STAGE V OR END STAGE RENAL DISEASE
- 403.1 - BENIGN HYPERTENSIVE KIDNEY DISEASE
- 403.10 - HYPERTENSIVE KIDNEY DISEASE BENIGN WITH CHRONIC KIDNEY DISEASE STAGE I THROUGH STAGE IV OR UNSPECIFIED
- 403.11 - HYPERTENSIVE KIDNEY DISEASE BENIGN WITH CHRONIC KIDNEY DISEASE STAGE V OR END STAGE RENAL DISEASE
- 403.9 - UNSPECIFIED HYPERTENSIVE KIDNEY DISEASE
- 403.90 - HYPERTENSIVE CHRONIC KIDNEY DISEASE UNSPECIFIED WITH CHRONIC KIDNEY DISEASE STAGE I THROUGH STAGE IV OR UNSPECIFIED
- 403.91 - HYPERTENSIVE CHRONIC KIDNEY DISEASE UNSPECIFIED WITH CHRONIC KIDNEY DISEASE STAGE V OR END STAGE RENAL DISEASE
- 404 - HYPERTENSIVE HEART AND CHRONIC KIDNEY DISEASE
- 404.0 - MALIGNANT HYPERTENSIVE HEART AND KIDNEY DISEASE
- 404.00 - HYPERTENSIVE HEART AND CHRONIC KIDNEY DISEASE MALIGNANT WITHOUT HEART FAILURE WITH CHRONIC KIDNEY DISEASE STAGE I THROUGH STAGE IV OR UNSPECIFIED
- 404.01 - HYPERTENSIVE HEART AND CHRONIC KIDNEY DISEASE MALIGNANT WITH HEART FAILURE WITH CHRONIC KIDNEY DISEASE STAGE I THROUGH STAGE IV OR UNSPECIFIED
- 404.02 - HYPERTENSIVE HEART AND CHRONIC KIDNEY DISEASE MALIGNANT WITHOUT HEART FAILURE WITH CHRONIC KIDNEY DISEASE STAGE V OR END STAGE RENAL DISEASE
- 404.03 - HYPERTENSIVE HEART AND CHRONIC KIDNEY DISEASE MALIGNANT WITH HEART FAILURE WITH CHRONIC KIDNEY DISEASE STAGE V OR END STAGE RENAL DISEASE
- 404.1 - BENIGN HYPERTENSIVE HEART AND KIDNEY DISEASE
- 404.10 - HYPERTENSIVE HEART AND CHRONIC KIDNEY DISEASE BENIGN WITHOUT HEART FAILURE WITH CHRONIC KIDNEY DISEASE STAGE I THROUGH STAGE IV OR UNSPECIFIED

- 404.11 - HYPERTENSIVE HEART AND CHRONIC KIDNEY DISEASE BENIGN WITH HEART FAILURE WITH CHRONIC KIDNEY DISEASE STAGE I THROUGH STAGE IV OR UNSPECIFIED
  - 404.12 - HYPERTENSIVE HEART AND CHRONIC KIDNEY DISEASE BENIGN WITHOUT HEART FAILURE WITH CHRONIC KIDNEY DISEASE STAGE V OR END STAGE RENAL DISEASE
  - 404.13 - HYPERTENSIVE HEART AND CHRONIC KIDNEY DISEASE BENIGN WITH HEART FAILURE WITH CHRONIC KIDNEY DISEASE STAGE V OR END STAGE RENAL DISEASE
  - 404.9 - UNSPECIFIED HYPERTENSIVE HEART AND KIDNEY DISEASE
  - 404.90 - HYPERTENSIVE HEART AND CHRONIC KIDNEY DISEASE UNSPECIFIED WITHOUT HEART FAILURE WITH CHRONIC KIDNEY DISEASE STAGE I THROUGH STAGE IV OR UNSPECIFIED
  - 404.91 - HYPERTENSIVE HEART AND CHRONIC KIDNEY DISEASE UNSPECIFIED WITH HEART FAILURE WITH CHRONIC KIDNEY DISEASE STAGE I THROUGH STAGE IV OR UNSPECIFIED
  - 404.92 - HYPERTENSIVE HEART AND CHRONIC KIDNEY DISEASE UNSPECIFIED WITHOUT HEART FAILURE WITH CHRONIC KIDNEY DISEASE STAGE V OR END STAGE RENAL DISEASE
  - 405 - SECONDARY HYPERTENSION
  - 405.0 - MALIGNANT SECONDARY HYPERTENSION
  - 405.01 - MALIGNANT RENOVASCULAR HYPERTENSION
  - 405.09 - OTHER MALIGNANT SECONDARY HYPERTENSION
  - 405.1 - BENIGN SECONDARY HYPERTENSION
  - 405.11 - BENIGN RENOVASCULAR HYPERTENSION
  - 405.19 - OTHER BENIGN SECONDARY HYPERTENSION
  - 405.9 - UNSPECIFIED SECONDARY HYPERTENSION
  - 405.91 - UNSPECIFIED RENOVASCULAR HYPERTENSION
  - 405.99 - OTHER UNSPECIFIED SECONDARY HYPERTENSION
  - 437.2 - HYPERTENSIVE ENCEPHALOPATHY
- The occurrence of **Medical Services** with the following attributes:
    - **ICD-9 Diagnosis Code (any position)** is any of: { 437.2, 401, 401.0, 401.1, 401.9, 402, 402.0, 402.00, 402.01, 402.1, 402.10, 402.11, 402.9, 402.90, 402.91, 403, 403.0, 403.00, 403.01, 403.1, 403.10, 403.11, 403.9, 403.90, 403.91, 404, 404.0, 404.00, 404.01, 404.02, 404.03, 404.1, 404.10, 404.11, 404.12, 404.13, 404.9, 404.90, 404.91, 405, 405.0, 405.01, 405.09, 405.1, 405.11, 405.19, 405.9, 405.91, 405.99, 404.92 }

- 437.2 - HYPERTENSIVE ENCEPHALOPATHY
- 401 - ESSENTIAL HYPERTENSION
- 401.0 - MALIGNANT ESSENTIAL HYPERTENSION
- 401.1 - BENIGN ESSENTIAL HYPERTENSION
- 401.9 - UNSPECIFIED ESSENTIAL HYPERTENSION
- 402 - HYPERTENSIVE HEART DISEASE
- 402.0 - MALIGNANT HYPERTENSIVE HEART DISEASE
- 402.00 - MALIGNANT HYPERTENSIVE HEART DISEASE WITHOUT HEART FAILURE
- 402.01 - MALIGNANT HYPERTENSIVE HEART DISEASE WITH HEART FAILURE
- 402.1 - BENIGN HYPERTENSIVE HEART DISEASE
- 402.10 - BENIGN HYPERTENSIVE HEART DISEASE WITHOUT HEART FAILURE
- 402.11 - BENIGN HYPERTENSIVE HEART DISEASE WITH HEART FAILURE
- 402.9 - UNSPECIFIED HYPERTENSIVE HEART DISEASE
- 402.90 - UNSPECIFIED HYPERTENSIVE HEART DISEASE WITHOUT HEART FAILURE
- 402.91 - UNSPECIFIED HYPERTENSIVE HEART DISEASE WITH HEART FAILURE
- 403 - HYPERTENSIVE CHRONIC KIDNEY DISEASE
- 403.0 - MALIGNANT HYPERTENSIVE KIDNEY DISEASE
- 403.00 - HYPERTENSIVE CHRONIC KIDNEY DISEASE MALIGNANT WITH CHRONIC KIDNEY DISEASE STAGE I THROUGH STAGE IV OR UNSPECIFIED
- 403.01 - HYPERTENSIVE CHRONIC KIDNEY DISEASE MALIGNANT WITH CHRONIC KIDNEY DISEASE STAGE V OR END STAGE RENAL DISEASE
- 403.1 - BENIGN HYPERTENSIVE KIDNEY DISEASE
- 403.10 - HYPERTENSIVE KIDNEY DISEASE BENIGN WITH CHRONIC KIDNEY DISEASE STAGE I THROUGH STAGE IV OR UNSPECIFIED
- 403.11 - HYPERTENSIVE KIDNEY DISEASE BENIGN WITH CHRONIC KIDNEY DISEASE STAGE V OR END STAGE RENAL DISEASE
- 403.9 - UNSPECIFIED HYPERTENSIVE KIDNEY DISEASE
- 403.90 - HYPERTENSIVE CHRONIC KIDNEY DISEASE UNSPECIFIED WITH CHRONIC KIDNEY DISEASE STAGE I THROUGH STAGE IV OR UNSPECIFIED
- 403.91 - HYPERTENSIVE CHRONIC KIDNEY DISEASE UNSPECIFIED WITH CHRONIC KIDNEY DISEASE STAGE V OR END STAGE RENAL DISEASE
- 404 - HYPERTENSIVE HEART AND CHRONIC KIDNEY DISEASE
- 404.0 - MALIGNANT HYPERTENSIVE HEART AND KIDNEY DISEASE
- 404.00 - HYPERTENSIVE HEART AND CHRONIC KIDNEY DISEASE MALIGNANT WITHOUT HEART FAILURE WITH CHRONIC KIDNEY DISEASE STAGE I THROUGH STAGE IV OR UNSPECIFIED
- 404.01 - HYPERTENSIVE HEART AND CHRONIC KIDNEY DISEASE MALIGNANT WITH HEART FAILURE WITH CHRONIC KIDNEY DISEASE STAGE I THROUGH STAGE IV OR UNSPECIFIED
- 404.02 - HYPERTENSIVE HEART AND CHRONIC KIDNEY DISEASE MALIGNANT WITHOUT HEART FAILURE WITH CHRONIC KIDNEY DISEASE STAGE V OR END STAGE RENAL DISEASE
- 404.03 - HYPERTENSIVE HEART AND CHRONIC KIDNEY DISEASE MALIGNANT WITH HEART FAILURE WITH CHRONIC KIDNEY DISEASE STAGE V OR END STAGE RENAL DISEASE
- 404.1 - BENIGN HYPERTENSIVE HEART AND KIDNEY DISEASE

- 404.10 - HYPERTENSIVE HEART AND CHRONIC KIDNEY DISEASE BENIGN WITHOUT HEART FAILURE WITH CHRONIC KIDNEY DISEASE STAGE I THROUGH STAGE IV OR UNSPECIFIED
- 404.11 - HYPERTENSIVE HEART AND CHRONIC KIDNEY DISEASE BENIGN WITH HEART FAILURE WITH CHRONIC KIDNEY DISEASE STAGE I THROUGH STAGE IV OR UNSPECIFIED
- 404.12 - HYPERTENSIVE HEART AND CHRONIC KIDNEY DISEASE BENIGN WITHOUT HEART FAILURE WITH CHRONIC KIDNEY DISEASE STAGE V OR END STAGE RENAL DISEASE
- 404.13 - HYPERTENSIVE HEART AND CHRONIC KIDNEY DISEASE BENIGN WITH HEART FAILURE WITH CHRONIC KIDNEY DISEASE STAGE V OR END STAGE RENAL DISEASE
- 404.9 - UNSPECIFIED HYPERTENSIVE HEART AND KIDNEY DISEASE
- 404.90 - HYPERTENSIVE HEART AND CHRONIC KIDNEY DISEASE UNSPECIFIED WITHOUT HEART FAILURE WITH CHRONIC KIDNEY DISEASE STAGE I THROUGH STAGE IV OR UNSPECIFIED
- 404.91 - HYPERTENSIVE HEART AND CHRONIC KIDNEY DISEASE UNSPECIFIED WITH HEART FAILURE WITH CHRONIC KIDNEY DISEASE STAGE I THROUGH STAGE IV OR UNSPECIFIED
- 405 - SECONDARY HYPERTENSION
- 405.0 - MALIGNANT SECONDARY HYPERTENSION
- 405.01 - MALIGNANT RENOVASCULAR HYPERTENSION
- 405.09 - OTHER MALIGNANT SECONDARY HYPERTENSION
- 405.1 - BENIGN SECONDARY HYPERTENSION
- 405.11 - BENIGN RENOVASCULAR HYPERTENSION
- 405.19 - OTHER BENIGN SECONDARY HYPERTENSION
- 405.9 - UNSPECIFIED SECONDARY HYPERTENSION
- 405.91 - UNSPECIFIED RENOVASCULAR HYPERTENSION
- 405.99 - OTHER UNSPECIFIED SECONDARY HYPERTENSION
- 404.92 - HYPERTENSIVE HEART AND CHRONIC KIDNEY DISEASE UNSPECIFIED WITHOUT HEART FAILURE WITH CHRONIC KIDNEY DISEASE STAGE V OR END STAGE RENAL DISEASE

### *Neuropathy*

This event measure was defined as occurring when any of the following criteria were met:

- The occurrence of **Medical Services** with the following attributes:
  - **ICD-9 Diagnosis Code (any position)** is any of: { 250.6, 250.60, 250.61, 250.62, 250.63, 337, 337.0, 337.00, 337.01, 337.09, 337.1, 356, 356.0, 356.1, 356.2, 356.3, 356.4, 356.8, 356.9 }

- 250.6 - DIABETES WITH NEUROLOGICAL MANIFESTATIONS
  - 250.60 - DIABETES WITH NEUROLOGICAL MANIFESTATIONS TYPE II OR UNSPECIFIED TYPE NOT STATED AS UNCONTROLLED
  - 250.61 - DIABETES WITH NEUROLOGICAL MANIFESTATIONS TYPE I [JUVENILE TYPE] NOT STATED AS UNCONTROLLED
  - 250.62 - DIABETES WITH NEUROLOGICAL MANIFESTATIONS TYPE II OR UNSPECIFIED TYPE UNCONTROLLED
  - 250.63 - DIABETES WITH NEUROLOGICAL MANIFESTATIONS TYPE I [JUVENILE TYPE] UNCONTROLLED
  - 337 - IDIOPATHIC PERIPHERAL AUTONOMIC NEUROPATHY
  - 337.0 - DISORDERS OF THE AUTONOMIC NERVOUS SYSTEM
  - 337.00 - IDIOPATHIC PERIPHERAL AUTONOMIC NEUROPATHY UNSPECIFIED
  - 337.01 - CAROTID SINUS SYNDROME
  - 337.09 - OTHER IDIOPATHIC PERIPHERAL AUTONOMIC NEUROPATHY
  - 337.1 - PERIPHERAL AUTONOMIC NEUROPATHY IN DISORDERS CLASSIFIED ELSEWHERE
  - 356 - HEREDITARY AND IDIOPATHIC PERIPHERAL NEUROPATHY
  - 356.0 - HEREDITARY PERIPHERAL NEUROPATHY
  - 356.1 - PERONEAL MUSCULAR ATROPHY
  - 356.2 - HEREDITARY SENSORY NEUROPATHY
  - 356.3 - REFSUM'S DISEASE
  - 356.4 - IDIOPATHIC PROGRESSIVE POLYNEUROPATHY
  - 356.8 - OTHER SPECIFIED IDIOPATHIC PERIPHERAL NEUROPATHY
  - 356.9 - UNSPECIFIED IDIOPATHIC PERIPHERAL NEUROPATHY
- The occurrence of **Inpatient Confinement** with the following attributes:
    - **ICD-9 Diagnosis Code (any position)** is any of: { 250.6, 250.60, 250.61, 250.62, 250.63, 337, 337.0, 337.00, 337.01, 337.09, 337.1, 356, 356.0, 356.1, 356.2, 356.3, 356.4, 356.8, 356.9 }



- 250.6 - DIABETES WITH NEUROLOGICAL MANIFESTATIONS
- 250.60 - DIABETES WITH NEUROLOGICAL MANIFESTATIONS TYPE II OR UNSPECIFIED TYPE NOT STATED AS UNCONTROLLED
- 250.61 - DIABETES WITH NEUROLOGICAL MANIFESTATIONS TYPE I [JUVENILE TYPE] NOT STATED AS UNCONTROLLED
- 250.62 - DIABETES WITH NEUROLOGICAL MANIFESTATIONS TYPE II OR UNSPECIFIED TYPE UNCONTROLLED
- 250.63 - DIABETES WITH NEUROLOGICAL MANIFESTATIONS TYPE I [JUVENILE TYPE] UNCONTROLLED
- 337 - IDIOPATHIC PERIPHERAL AUTONOMIC NEUROPATHY
- 337.0 - DISORDERS OF THE AUTONOMIC NERVOUS SYSTEM
- 337.00 - IDIOPATHIC PERIPHERAL AUTONOMIC NEUROPATHY UNSPECIFIED
- 337.01 - CAROTID SINUS SYNDROME
- 337.09 - OTHER IDIOPATHIC PERIPHERAL AUTONOMIC NEUROPATHY
- 337.1 - PERIPHERAL AUTONOMIC NEUROPATHY IN DISORDERS CLASSIFIED ELSEWHERE
- 356 - HEREDITARY AND IDIOPATHIC PERIPHERAL NEUROPATHY
- 356.0 - HEREDITARY PERIPHERAL NEUROPATHY
- 356.1 - PERONEAL MUSCULAR ATROPHY
- 356.2 - HEREDITARY SENSORY NEUROPATHY
- 356.3 - REFSUM'S DISEASE
- 356.4 - IDIOPATHIC PROGRESSIVE POLYNEUROPATHY
- 356.8 - OTHER SPECIFIED IDIOPATHIC PERIPHERAL NEUROPATHY
- 356.9 - UNSPECIFIED IDIOPATHIC PERIPHERAL NEUROPATHY

### *Pancreatic disease*

This event measure was defined as occurring when any of the following criteria were met:

- The occurrence of **Inpatient Confinement** with the following attributes:
  - **ICD-9 Diagnosis Code (any position)** is any of: { 577, 577.0, 577.1, 577.2, 577.8, 577.9 }
    - 577 - DISEASES OF PANCREAS
    - 577.0 - ACUTE PANCREATITIS
    - 577.1 - CHRONIC PANCREATITIS
    - 577.2 - CYST AND PSEUDOCYST OF PANCREAS
    - 577.8 - OTHER SPECIFIED DISEASES OF PANCREAS
    - 577.9 - UNSPECIFIED DISEASE OF PANCREAS
- The occurrence of **Medical Services** with the following attributes:
  - **ICD-9 Diagnosis Code (any position)** is any of: { 577, 577.0, 577.1, 577.2, 577.8, 577.9 }

- 577 - DISEASES OF PANCREAS
- 577.0 - ACUTE PANCREATITIS
- 577.1 - CHRONIC PANCREATITIS
- 577.2 - CYST AND PSEUDOCYST OF PANCREAS
- 577.8 - OTHER SPECIFIED DISEASES OF PANCREAS
- 577.9 - UNSPECIFIED DISEASE OF PANCREAS

### *Renal impairment or dialysis*

This event measure was defined as occurring when any of the following criteria were met:

- The occurrence of **Inpatient Confinement** with the following attributes:
  - **ICD-9 Diagnosis Code (any position)** is any of: { 585, 585.1, 585.2, 585.3, 585.4, 585.5, 585.6, 585.9, 586 }
    - 585 - CHRONIC KIDNEY DISEASE (CKD)
    - 585.1 - CHRONIC KIDNEY DISEASE STAGE I
    - 585.2 - CHRONIC KIDNEY DISEASE STAGE II (MILD)
    - 585.3 - CHRONIC KIDNEY DISEASE STAGE III (MODERATE)
    - 585.4 - CHRONIC KIDNEY DISEASE STAGE IV (SEVERE)
    - 585.5 - CHRONIC KIDNEY DISEASE STAGE V
    - 585.6 - END STAGE RENAL DISEASE
    - 585.9 - CHRONIC KIDNEY DISEASE UNSPECIFIED
    - 586 - RENAL FAILURE UNSPECIFIED
- The occurrence of **Medical Services** with the following attributes:
  - **ICD-9 Diagnosis Code (any position)** is any of: { 585, 585.1, 585.2, 585.3, 585.4, 585.5, 585.6, 585.9, 586 }
    - 585 - CHRONIC KIDNEY DISEASE (CKD)
    - 585.1 - CHRONIC KIDNEY DISEASE STAGE I
    - 585.2 - CHRONIC KIDNEY DISEASE STAGE II (MILD)
    - 585.3 - CHRONIC KIDNEY DISEASE STAGE III (MODERATE)
    - 585.4 - CHRONIC KIDNEY DISEASE STAGE IV (SEVERE)
    - 585.5 - CHRONIC KIDNEY DISEASE STAGE V
    - 585.6 - END STAGE RENAL DISEASE
    - 585.9 - CHRONIC KIDNEY DISEASE UNSPECIFIED
    - 586 - RENAL FAILURE UNSPECIFIED
- The occurrence of **Medical Services** with the following attributes:
  - **HCPCS/PROC\_CD Procedure Code** is any of: { 3066F, 36145, 36147, 36148, 49421, 75790, 75791, 90937, 90945, 90947, 90963, 90964, 90965, 90966, 90967, 90968, 90969, 90970, 90989 }

- 3066F - Documentation of treatment for nephropathy (eg, patient receiving dialysis, patient being treated for ESRD, CRF, ARF, or renal insufficiency, any visit to a nephrologist) (DM)
- 36145 - Introduction of needle or intracatheter; arteriovenous shunt created for dialysis (cannula, fistula, or graft)
- 36147 - Introduction of needle and/or catheter, arteriovenous shunt created for dialysis (graft/fistula); initial access with complete radiological evaluation of dialysis access, including fluoroscopy, image documentation and report (includes access of shunt, injection[s] of contrast, and all necessary imaging from the arterial anastomosis and adjacent artery through entire venous outflow including the inferior or superior vena cava)
- 36148 - Introduction of needle and/or catheter, arteriovenous shunt created for dialysis (graft/fistula); additional access for therapeutic intervention (List separately in addition to code for primary procedure)
- 49421 - Insertion of intraperitoneal cannula or catheter for drainage or dialysis; permanent / Insertion of tunneled intraperitoneal catheter for dialysis, open
- 75790 - Angiography, arteriovenous shunt (eg, dialysis patient), radiological supervision and interpretation
- 75791 - Angiography, arteriovenous shunt (eg, dialysis patient fistula/graft), complete evaluation of dialysis access, including fluoroscopy, image documentation and report (includes injections of contrast and all necessary imaging from the arterial anastomosis and adjacent artery through entire venous outflow including the inferior or superior vena cava), radiological supervision and interpretation
- 90937 - Hemodialysis procedure requiring repeated evaluation(s) with or without substantial revision of dialysis prescription
- 90945 - Dialysis procedure other than hemodialysis (eg, peritoneal dialysis, hemofiltration, or other continuous renal replacement therapies), with single evaluation by a physician or other qualified health care professional / Dialysis procedure other than hemodialysis (eg, peritoneal dialysis, hemofiltration, or other continuous renal replacement therapies), with single physician evaluation / Dialysis procedure other than hemodialysis (eg, peritoneal, hemofiltration), with single physician evaluation
- 90947 - Dialysis procedure other than hemodialysis (eg, peritoneal dialysis, hemofiltration, or other continuous renal replacement therapies) requiring repeated evaluation by a physician or other qualified health care professional, with or without substantial revision of dialysis prescription / Dialysis procedure other than hemodialysis (eg, peritoneal dialysis, hemofiltration, or other continuous renal replacement therapies) requiring repeated evaluations by a physician or other qualified health care professional, with or without substantial revision of dialysis prescription / Dialysis procedure other than hemodialysis (eg, peritoneal dialysis, hemofiltration, or other continuous renal replacement therapies) requiring repeated physician evaluations, with or without substantial revision of dialysis prescription / Dialysis procedure other than hemodialysis (eg, peritoneal, hemofiltration) requiring repeated evaluations, with or without substantial revision of dialysis prescription
- 90963 - End-stage renal disease (ESRD) related services for home dialysis per full month, for patients younger than 2 years of age to include monitoring for the adequacy of nutrition, assessment of growth and development, and counseling of parents

- 90964 - End-stage renal disease (ESRD) related services for home dialysis per full month, for patients 2-11 years of age to include monitoring for the adequacy of nutrition, assessment of growth and development, and counseling of parents
- 90965 - End-stage renal disease (ESRD) related services for home dialysis per full month, for patients 12-19 years of age to include monitoring for the adequacy of nutrition, assessment of growth and development, and counseling of parents
- 90966 - End-stage renal disease (ESRD) related services for home dialysis per full month, for patients 20 years of age and older
- 90967 - End-stage renal disease (ESRD) related services for dialysis less than a full month of service, per day; for patients younger than 2 years of age
- 90968 - End-stage renal disease (ESRD) related services for dialysis less than a full month of service, per day; for patients 2-11 years of age
- 90969 - End-stage renal disease (ESRD) related services for dialysis less than a full month of service, per day; for patients 12-19 years of age
- 90970 - End-stage renal disease (ESRD) related services for dialysis less than a full month of service, per day; for patients 20 years of age and older
- 90989 - Dialysis training, patient, including helper where applicable, any mode, completed course

### *Retinopathy*

This event measure was defined as occurring when any of the following criteria were met:

- The occurrence of **Inpatient Confinement** with the following attributes:
  - **ICD-9 Diagnosis Code (any position)** is any of: { 362.01, 362.02, 362.03, 362.04, 362.05, 362.06, 362.07, 369, 369.0, 369.00, 369.01, 369.02, 369.03, 369.04, 369.05, 369.06, 369.07, 369.08, 369.1, 369.10, 369.11, 369.12, 369.13, 369.14, 369.15, 369.16, 369.17, 369.18, 369.2, 369.20, 369.21, 369.22, 369.23, 369.24, 369.25, 369.3, 369.4, 369.6, 369.60, 369.61, 369.62, 369.63, 369.64, 369.65, 369.66, 369.67, 369.68, 369.69, 369.7, 369.70, 369.71, 369.72, 369.73, 369.74, 369.75, 369.76, 369.8, 369.9 }

- 362.01 - BACKGROUND DIABETIC RETINOPATHY
- 362.02 - PROLIFERATIVE DIABETIC RETINOPATHY
- 362.03 - NONPROLIFERATIVE DIABETIC RETINOPATHY NOS
- 362.04 - MILD NONPROLIFERATIVE DIABETIC RETINOPATHY
- 362.05 - MODERATE NONPROLIFERATIVE DIABETIC RETINOPATHY
- 362.06 - SEVERE NONPROLIFERATIVE DIABETIC RETINOPATHY
- 362.07 - DIABETIC MACULAR EDEMA
- 369 - BLINDNESS AND LOW VISION
- 369.0 - PROFOUND VISION IMPAIRMENT BOTH EYES
- 369.00 - BLINDNESS OF BOTH EYES IMPAIRMENT LEVEL NOT FURTHER SPECIFIED
- 369.01 - BETTER EYE: TOTAL VISION IMPAIRMENT; LESSER EYE: TOTAL VISION IMPAIRMENT
- 369.02 - BETTER EYE: NEAR-TOTAL VISION IMPAIRMENT; LESSER EYE: NOT FURTHER SPECIFIED
- 369.03 - BETTER EYE: NEAR-TOTAL VISION IMPAIRMENT; LESSER EYE: TOTAL VISION IMPAIRMENT
- 369.04 - BETTER EYE: NEAR-TOTAL VISION IMPAIRMENT; LESSER EYE: NEAR-TOTAL VISION IMPAIRMENT
- 369.05 - BETTER EYE: PROFOUND VISION IMPAIRMENT; LESSER EYE: NOT FURTHER SPECIFIED
- 369.06 - BETTER EYE: PROFOUND VISION IMPAIRMENT; LESSER EYE: TOTAL VISION IMPAIRMENT
- 369.07 - BETTER EYE: PROFOUND VISION IMPAIRMENT; LESSER EYE: NEAR-TOTAL VISION IMPAIRMENT
- 369.08 - BETTER EYE: PROFOUND VISION IMPAIRMENT; LESSER EYE: PROFOUND VISION IMPAIRMENT
- 369.1 - MODERATE OR SEVERE VISION IMPAIRMENT BETTER EYE; PROFOUND VISION IMPAIRMENT OF LESSER EYE
- 369.10 - BLINDNESS ONE EYE; LOW VISION OTHER EYE
- 369.11 - BETTER EYE: SEVERE VISION IMPAIRMENT; LESSER EYE: BLIND NOT FURTHER SPECIFIED
- 369.12 - BETTER EYE: SEVERE VISION IMPAIRMENT; LESSER EYE: TOTAL VISION IMPAIRMENT
- 369.13 - BETTER EYE: SEVERE VISION IMPAIRMENT; LESSER EYE: NEAR-TOTAL VISION IMPAIRMENT
- 369.14 - BETTER EYE: SEVERE VISION IMPAIRMENT; LESSER EYE: PROFOUND VISION IMPAIRMENT
- 369.15 - BETTER EYE: MODERATE VISION IMPAIRMENT; LESSER EYE: BLIND NOT FURTHER SPECIFIED
- 369.16 - BETTER EYE: MODERATE VISION IMPAIRMENT; LESSER EYE: TOTAL VISION IMPAIRMENT
- 369.17 - BETTER EYE: MODERATE VISION IMPAIRMENT; LESSER EYE: NEAR-TOTAL VISION IMPAIRMENT
- 369.18 - BETTER EYE: MODERATE VISION IMPAIRMENT; LESSER EYE: PROFOUND VISION IMPAIRMENT
- 369.2 - MODERATE OR SEVERE VISION IMPAIRMENT BOTH EYES
- 369.20 - LOW VISION BOTH EYES NOT OTHERWISE SPECIFIED

- 369.21 - BETTER EYE: SEVERE VISION IMPAIRMENT; LESSER EYE; IMPAIRMENT NOT FURTHER SPECIFIED
  - 369.22 - BETTER EYE: SEVERE VISION IMPAIRMENT; LESSER EYE: SEVERE VISION IMPAIRMENT
  - 369.23 - BETTER EYE: MODERATE VISION IMPAIRMENT; LESSER EYE: IMPAIRMENT NOT FURTHER SPECIFIED
  - 369.24 - BETTER EYE: MODERATE VISION IMPAIRMENT; LESSER EYE: SEVERE VISION IMPAIRMENT
  - 369.25 - BETTER EYE: MODERATE VISION IMPAIRMENT; LESSER EYE: MODERATE VISION IMPAIRMENT
  - 369.3 - UNQUALIFIED VISUAL LOSS BOTH EYES
  - 369.4 - LEGAL BLINDNESS AS DEFINED IN U.S.A.
  - 369.6 - PROFOUND VISION IMPAIRMENT ONE EYE
  - 369.60 - BLINDNESS ONE EYE NOT OTHERWISE SPECIFIED
  - 369.61 - ONE EYE: TOTAL VISION IMPAIRMENT; OTHER EYE: NOT SPECIFIED
  - 369.62 - ONE EYE: TOTAL VISION IMPAIRMENT; OTHER EYE: NEAR-NORMAL VISION
  - 369.63 - ONE EYE: TOTAL VISION IMPAIRMENT; OTHER EYE: NORMAL VISION
  - 369.64 - ONE EYE: NEAR-TOTAL VISION IMPAIRMENT; OTHER EYE: VISION NOT SPECIFIED
  - 369.65 - ONE EYE: NEAR-TOTAL VISION IMPAIRMENT; OTHER EYE: NEAR-NORMAL VISION
  - 369.66 - ONE EYE: NEAR-TOTAL VISION IMPAIRMENT; OTHER EYE: NORMAL VISION
  - 369.67 - ONE EYE: PROFOUND VISION IMPAIRMENT; OTHER EYE: VISION NOT SPECIFIED
  - 369.68 - ONE EYE: PROFOUND VISION IMPAIRMENT; OTHER EYE: NEAR-NORMAL VISION
  - 369.69 - ONE EYE: PROFOUND VISION IMPAIRMENT; OTHER EYE: NORMAL VISION
  - 369.7 - MODERATE OR SEVERE VISION IMPAIRMENT ONE EYE
  - 369.70 - LOW VISION ONE EYE NOT OTHERWISE SPECIFIED
  - 369.71 - ONE EYE: SEVERE VISION IMPAIRMENT; OTHER EYE: VISION NOT SPECIFIED
  - 369.72 - ONE EYE: SEVERE VISION IMPAIRMENT; OTHER EYE: NEAR-NORMAL VISION
  - 369.73 - ONE EYE: SEVERE VISION IMPAIRMENT; OTHER EYE: NORMAL VISION
  - 369.74 - ONE EYE: MODERATE VISION IMPAIRMENT; OTHER EYE: VISION NOT SPECIFIED
  - 369.75 - ONE EYE: MODERATE VISION IMPAIRMENT; OTHER EYE: NEAR-NORMAL VISION
  - 369.76 - ONE EYE: MODERATE VISION IMPAIRMENT; OTHER EYE: NORMAL VISION
  - 369.8 - UNQUALIFIED VISUAL LOSS ONE EYE
  - 369.9 - UNSPECIFIED VISUAL LOSS
- The occurrence of **Medical Services** with the following attributes:
    - **ICD-9 Diagnosis Code (any position)** is any of: { 362.01, 362.02, 362.03, 362.04, 362.05, 362.06, 362.07, 369, 369.0, 369.00, 369.01, 369.02, 369.03, 369.04, 369.05, 369.06, 369.07, 369.08, 369.1, 369.10, 369.11, 369.12, 369.13, 369.14, 369.15, 369.16, 369.17, 369.18, 369.2, 369.20, 369.21, 369.22, 369.23, 369.24, 369.25, 369.3, 369.4, 369.6, 369.60, 369.61, 369.62, 369.63, 369.64, 369.65,

369.66, 369.67, 369.68, 369.69, 369.7, 369.70, 369.71, 369.72, 369.73, 369.74,  
369.75, 369.76, 369.8, 369.9 }

- 362.01 - BACKGROUND DIABETIC RETINOPATHY
- 362.02 - PROLIFERATIVE DIABETIC RETINOPATHY
- 362.03 - NONPROLIFERATIVE DIABETIC RETINOPATHY NOS
- 362.04 - MILD NONPROLIFERATIVE DIABETIC RETINOPATHY
- 362.05 - MODERATE NONPROLIFERATIVE DIABETIC RETINOPATHY
- 362.06 - SEVERE NONPROLIFERATIVE DIABETIC RETINOPATHY
- 362.07 - DIABETIC MACULAR EDEMA
- 369 - BLINDNESS AND LOW VISION
- 369.0 - PROFOUND VISION IMPAIRMENT BOTH EYES
- 369.00 - BLINDNESS OF BOTH EYES IMPAIRMENT LEVEL NOT FURTHER SPECIFIED
- 369.01 - BETTER EYE: TOTAL VISION IMPAIRMENT; LESSER EYE: TOTAL VISION IMPAIRMENT
- 369.02 - BETTER EYE: NEAR-TOTAL VISION IMPAIRMENT; LESSER EYE: NOT FURTHER SPECIFIED
- 369.03 - BETTER EYE: NEAR-TOTAL VISION IMPAIRMENT; LESSER EYE: TOTAL VISION IMPAIRMENT
- 369.04 - BETTER EYE: NEAR-TOTAL VISION IMPAIRMENT; LESSER EYE: NEAR-TOTAL VISION IMPAIRMENT
- 369.05 - BETTER EYE: PROFOUND VISION IMPAIRMENT; LESSER EYE: NOT FURTHER SPECIFIED
- 369.06 - BETTER EYE: PROFOUND VISION IMPAIRMENT; LESSER EYE: TOTAL VISION IMPAIRMENT
- 369.07 - BETTER EYE: PROFOUND VISION IMPAIRMENT; LESSER EYE: NEAR-TOTAL VISION IMPAIRMENT
- 369.08 - BETTER EYE: PROFOUND VISION IMPAIRMENT; LESSER EYE: PROFOUND VISION IMPAIRMENT
- 369.1 - MODERATE OR SEVERE VISION IMPAIRMENT BETTER EYE; PROFOUND VISION IMPAIRMENT OF LESSER EYE
- 369.10 - BLINDNESS ONE EYE; LOW VISION OTHER EYE
- 369.11 - BETTER EYE: SEVERE VISION IMPAIRMENT; LESSER EYE: BLIND NOT FURTHER SPECIFIED
- 369.12 - BETTER EYE: SEVERE VISION IMPAIRMENT; LESSER EYE: TOTAL VISION IMPAIRMENT
- 369.13 - BETTER EYE: SEVERE VISION IMPAIRMENT; LESSER EYE: NEAR-TOTAL VISION IMPAIRMENT
- 369.14 - BETTER EYE: SEVERE VISION IMPAIRMENT; LESSER EYE: PROFOUND VISION IMPAIRMENT
- 369.15 - BETTER EYE: MODERATE VISION IMPAIRMENT; LESSER EYE: BLIND NOT FURTHER SPECIFIED
- 369.16 - BETTER EYE: MODERATE VISION IMPAIRMENT; LESSER EYE: TOTAL VISION IMPAIRMENT
- 369.17 - BETTER EYE: MODERATE VISION IMPAIRMENT; LESSER EYE: NEAR-TOTAL VISION IMPAIRMENT
- 369.18 - BETTER EYE: MODERATE VISION IMPAIRMENT; LESSER EYE: PROFOUND VISION IMPAIRMENT
- 369.2 - MODERATE OR SEVERE VISION IMPAIRMENT BOTH EYES
- 369.20 - LOW VISION BOTH EYES NOT OTHERWISE SPECIFIED



- 369.21 - BETTER EYE: SEVERE VISION IMPAIRMENT; LESSER EYE; IMPAIRMENT NOT FURTHER SPECIFIED
- 369.22 - BETTER EYE: SEVERE VISION IMPAIRMENT; LESSER EYE: SEVERE VISION IMPAIRMENT
- 369.23 - BETTER EYE: MODERATE VISION IMPAIRMENT; LESSER EYE: IMPAIRMENT NOT FURTHER SPECIFIED
- 369.24 - BETTER EYE: MODERATE VISION IMPAIRMENT; LESSER EYE: SEVERE VISION IMPAIRMENT
- 369.25 - BETTER EYE: MODERATE VISION IMPAIRMENT; LESSER EYE: MODERATE VISION IMPAIRMENT
- 369.3 - UNQUALIFIED VISUAL LOSS BOTH EYES
- 369.4 - LEGAL BLINDNESS AS DEFINED IN U.S.A.
- 369.6 - PROFOUND VISION IMPAIRMENT ONE EYE
- 369.60 - BLINDNESS ONE EYE NOT OTHERWISE SPECIFIED
- 369.61 - ONE EYE: TOTAL VISION IMPAIRMENT; OTHER EYE: NOT SPECIFIED
- 369.62 - ONE EYE: TOTAL VISION IMPAIRMENT; OTHER EYE: NEAR-NORMAL VISION
- 369.63 - ONE EYE: TOTAL VISION IMPAIRMENT; OTHER EYE: NORMAL VISION
- 369.64 - ONE EYE: NEAR-TOTAL VISION IMPAIRMENT; OTHER EYE: VISION NOT SPECIFIED
- 369.65 - ONE EYE: NEAR-TOTAL VISION IMPAIRMENT; OTHER EYE: NEAR-NORMAL VISION
- 369.66 - ONE EYE: NEAR-TOTAL VISION IMPAIRMENT; OTHER EYE: NORMAL VISION
- 369.67 - ONE EYE: PROFOUND VISION IMPAIRMENT; OTHER EYE: VISION NOT SPECIFIED
- 369.68 - ONE EYE: PROFOUND VISION IMPAIRMENT; OTHER EYE: NEAR-NORMAL VISION
- 369.69 - ONE EYE: PROFOUND VISION IMPAIRMENT; OTHER EYE: NORMAL VISION
- 369.7 - MODERATE OR SEVERE VISION IMPAIRMENT ONE EYE
- 369.70 - LOW VISION ONE EYE NOT OTHERWISE SPECIFIED
- 369.71 - ONE EYE: SEVERE VISION IMPAIRMENT; OTHER EYE: VISION NOT SPECIFIED
- 369.72 - ONE EYE: SEVERE VISION IMPAIRMENT; OTHER EYE: NEAR-NORMAL VISION
- 369.73 - ONE EYE: SEVERE VISION IMPAIRMENT; OTHER EYE: NORMAL VISION
- 369.74 - ONE EYE: MODERATE VISION IMPAIRMENT; OTHER EYE: VISION NOT SPECIFIED
- 369.75 - ONE EYE: MODERATE VISION IMPAIRMENT; OTHER EYE: NEAR-NORMAL VISION
- 369.76 - ONE EYE: MODERATE VISION IMPAIRMENT; OTHER EYE: NORMAL VISION
- 369.8 - UNQUALIFIED VISUAL LOSS ONE EYE
- 369.9 - UNSPECIFIED VISUAL LOSS

### *Smoking*

This event measure was defined as occurring when any of the following criteria were met:

- The occurrence of **Inpatient Confinement** with the following attributes:
  - **ICD-9 Diagnosis Code (any position)** is any of: { 305.1, V15.82 }

- 305.1 - NONDEPENDENT TOBACCO USE DISORDER
- V15.82 - PERSONAL HISTORY OF TOBACCO USE
- The occurrence of **Medical Services** with the following attributes:
  - **ICD-9 Diagnosis Code (any position)** is any of: { 305.1, V15.82 }
    - 305.1 - NONDEPENDENT TOBACCO USE DISORDER
    - V15.82 - PERSONAL HISTORY OF TOBACCO USE

### *Stroke*

This event measure was defined as occurring when any of the following criteria were met:

- The occurrence of **Inpatient Confinement** with the following attributes:
  - **ICD-9 Diagnosis Code (any position)** is any of: { 430, 432, 432.0, 432.1, 432.9, 433, 433.0, 433.00, 433.01, 433.1, 433.10, 433.11, 433.2, 433.20, 433.21, 433.3, 433.30, 433.31, 433.8, 433.80, 433.81, 433.9, 433.90, 433.91, 434, 434.0, 434.00, 434.01, 434.1, 434.10, 434.11, 434.9, 434.90, 434.91, 436 }

- 430 - SUBARACHNOID HEMORRHAGE
- 432 - OTHER AND UNSPECIFIED INTRACRANIAL HEMORRHAGE
- 432.0 - NONTRAUMATIC EXTRADURAL HEMORRHAGE
- 432.1 - SUBDURAL HEMORRHAGE
- 432.9 - UNSPECIFIED INTRACRANIAL HEMORRHAGE
- 433 - OCCLUSION AND STENOSIS OF PRECEREBRAL ARTERIES
- 433.0 - OCCLUSION AND STENOSIS OF BASILAR ARTERY
- 433.00 - OCCLUSION AND STENOSIS OF BASILAR ARTERY WITHOUT CEREBRAL INFARCTION
- 433.01 - OCCLUSION AND STENOSIS OF BASILAR ARTERY WITH CEREBRAL INFARCTION
- 433.1 - OCCLUSION AND STENOSIS OF CAROTID ARTERY
- 433.10 - OCCLUSION AND STENOSIS OF CAROTID ARTERY WITHOUT CEREBRAL INFARCTION
- 433.11 - OCCLUSION AND STENOSIS OF CAROTID ARTERY WITH CEREBRAL INFARCTION
- 433.2 - OCCLUSION AND STENOSIS OF VERTEBRAL ARTERY
- 433.20 - OCCLUSION AND STENOSIS OF VERTEBRAL ARTERY WITHOUT CEREBRAL INFARCTION
- 433.21 - OCCLUSION AND STENOSIS OF VERTEBRAL ARTERY WITH CEREBRAL INFARCTION
- 433.3 - OCCLUSION AND STENOSIS OF MULTIPLE AND BILATERAL PRECEREBRAL ARTERIES
- 433.30 - OCCLUSION AND STENOSIS OF MULTIPLE AND BILATERAL PRECEREBRAL ARTERIES WITHOUT CEREBRAL INFARCTION
- 433.31 - OCCLUSION AND STENOSIS OF MULTIPLE AND BILATERAL PRECEREBRAL ARTERIES WITH CEREBRAL INFARCTION
- 433.8 - OCCLUSION AND STENOSIS OF OTHER SPECIFIED PRECEREBRAL ARTERY
- 433.80 - OCCLUSION AND STENOSIS OF OTHER SPECIFIED PRECEREBRAL ARTERY WITHOUT CEREBRAL INFARCTION
- 433.81 - OCCLUSION AND STENOSIS OF OTHER SPECIFIED PRECEREBRAL ARTERY WITH CEREBRAL INFARCTION
- 433.9 - OCCLUSION AND STENOSIS OF UNSPECIFIED PRECEREBRAL ARTERY
- 433.90 - OCCLUSION AND STENOSIS OF UNSPECIFIED PRECEREBRAL ARTERY WITHOUT CEREBRAL INFARCTION
- 433.91 - OCCLUSION AND STENOSIS OF UNSPECIFIED PRECEREBRAL ARTERY WITH CEREBRAL INFARCTION
- 434 - OCCLUSION OF CEREBRAL ARTERIES
- 434.0 - CEREBRAL THROMBOSIS
- 434.00 - CEREBRAL THROMBOSIS WITHOUT CEREBRAL INFARCTION
- 434.01 - CEREBRAL THROMBOSIS WITH CEREBRAL INFARCTION
- 434.1 - CEREBRAL EMBOLISM
- 434.10 - CEREBRAL EMBOLISM WITHOUT CEREBRAL INFARCTION
- 434.11 - CEREBRAL EMBOLISM WITH CEREBRAL INFARCTION
- 434.9 - CEREBRAL ARTERY OCCLUSION UNSPECIFIED
- 434.90 - CEREBRAL ARTERY OCCLUSION UNSPECIFIED WITHOUT CEREBRAL INFARCTION
- 434.91 - CEREBRAL ARTERY OCCLUSION UNSPECIFIED WITH CEREBRAL INFARCTION

- 436 - ACUTE BUT ILL-DEFINED CEREBROVASCULAR DISEASE
- The occurrence of **Medical Services** with the following attributes:
  - **ICD-9 Diagnosis Code (any position)** is any of: { 430, 432, 432.0, 432.1, 432.9, 433, 433.0, 433.00, 433.01, 433.1, 433.10, 433.11, 433.2, 433.20, 433.21, 433.3, 433.30, 433.31, 433.8, 433.80, 433.81, 433.9, 433.90, 433.91, 434, 434.0, 434.00, 434.01, 434.1, 434.10, 434.11, 434.9, 434.90, 434.91, 436 }

- 430 - SUBARACHNOID HEMORRHAGE
- 432 - OTHER AND UNSPECIFIED INTRACRANIAL HEMORRHAGE
- 432.0 - NONTRAUMATIC EXTRADURAL HEMORRHAGE
- 432.1 - SUBDURAL HEMORRHAGE
- 432.9 - UNSPECIFIED INTRACRANIAL HEMORRHAGE
- 433 - OCCLUSION AND STENOSIS OF PRECEREBRAL ARTERIES
- 433.0 - OCCLUSION AND STENOSIS OF BASILAR ARTERY
- 433.00 - OCCLUSION AND STENOSIS OF BASILAR ARTERY WITHOUT CEREBRAL INFARCTION
- 433.01 - OCCLUSION AND STENOSIS OF BASILAR ARTERY WITH CEREBRAL INFARCTION
- 433.1 - OCCLUSION AND STENOSIS OF CAROTID ARTERY
- 433.10 - OCCLUSION AND STENOSIS OF CAROTID ARTERY WITHOUT CEREBRAL INFARCTION
- 433.11 - OCCLUSION AND STENOSIS OF CAROTID ARTERY WITH CEREBRAL INFARCTION
- 433.2 - OCCLUSION AND STENOSIS OF VERTEBRAL ARTERY
- 433.20 - OCCLUSION AND STENOSIS OF VERTEBRAL ARTERY WITHOUT CEREBRAL INFARCTION
- 433.21 - OCCLUSION AND STENOSIS OF VERTEBRAL ARTERY WITH CEREBRAL INFARCTION
- 433.3 - OCCLUSION AND STENOSIS OF MULTIPLE AND BILATERAL PRECEREBRAL ARTERIES
- 433.30 - OCCLUSION AND STENOSIS OF MULTIPLE AND BILATERAL PRECEREBRAL ARTERIES WITHOUT CEREBRAL INFARCTION
- 433.31 - OCCLUSION AND STENOSIS OF MULTIPLE AND BILATERAL PRECEREBRAL ARTERIES WITH CEREBRAL INFARCTION
- 433.8 - OCCLUSION AND STENOSIS OF OTHER SPECIFIED PRECEREBRAL ARTERY
- 433.80 - OCCLUSION AND STENOSIS OF OTHER SPECIFIED PRECEREBRAL ARTERY WITHOUT CEREBRAL INFARCTION
- 433.81 - OCCLUSION AND STENOSIS OF OTHER SPECIFIED PRECEREBRAL ARTERY WITH CEREBRAL INFARCTION
- 433.9 - OCCLUSION AND STENOSIS OF UNSPECIFIED PRECEREBRAL ARTERY
- 433.90 - OCCLUSION AND STENOSIS OF UNSPECIFIED PRECEREBRAL ARTERY WITHOUT CEREBRAL INFARCTION
- 433.91 - OCCLUSION AND STENOSIS OF UNSPECIFIED PRECEREBRAL ARTERY WITH CEREBRAL INFARCTION
- 434 - OCCLUSION OF CEREBRAL ARTERIES
- 434.0 - CEREBRAL THROMBOSIS
- 434.00 - CEREBRAL THROMBOSIS WITHOUT CEREBRAL INFARCTION
- 434.01 - CEREBRAL THROMBOSIS WITH CEREBRAL INFARCTION
- 434.1 - CEREBRAL EMBOLISM
- 434.10 - CEREBRAL EMBOLISM WITHOUT CEREBRAL INFARCTION
- 434.11 - CEREBRAL EMBOLISM WITH CEREBRAL INFARCTION
- 434.9 - CEREBRAL ARTERY OCCLUSION UNSPECIFIED
- 434.90 - CEREBRAL ARTERY OCCLUSION UNSPECIFIED WITHOUT CEREBRAL INFARCTION
- 434.91 - CEREBRAL ARTERY OCCLUSION UNSPECIFIED WITH CEREBRAL INFARCTION

- 436 - ACUTE BUT ILL-DEFINED CEREBROVASCULAR DISEASE

*Total cost*

This measure sums the values of the following attributes and measures:

- **Standard Cost Amount** in **any medical event**
- **Provider Charge Amount** in **any medical event**
- **Standard Cost Amount** in **any medical event**

*Use of ARB*

This event measure was defined as occurring when any of the following criteria were met:

- The occurrence of **Prescription Claims** with the following attributes:
  - **NDC Generic Name** is any of: { ALISKIREN/VALSARTAN, AMLODIPINE  
 BESYLATE/OLMESARTAN MEDOXOMIL, AMLODIPINE  
 BESYLATE/VALSARTAN, AMLODIPINE  
 BESYLATE/VALSARTAN/HYDROCHLOROTHIAZIDE, AZILSARTAN  
 MEDOXOMIL, AZILSARTAN MEDOXOMIL/CHLORTHALIDONE, CANDESARTAN  
 CILEXETIL, CANDESARTAN CILEXETIL/HYDROCHLOROTHIAZIDE,  
 EPROSARTAN MESYLATE, EPROSARTAN  
 MESYLATE/HYDROCHLOROTHIAZIDE, IRBESARTAN,  
 IRBESARTAN/HYDROCHLOROTHIAZIDE, LOSARTAN POTASSIUM, LOSARTAN  
 POTASSIUM/HYDROCHLOROTHIAZIDE, OLMESARTAN MEDOXOMIL,  
 OLMESARTAN MEDOXOMIL/AMLODIPINE  
 BESYLATE/HYDROCHLOROTHIAZIDE, OLMESARTAN  
 MEDOXOMIL/HYDROCHLOROTHIAZIDE, TELMISARTAN,  
 TELMISARTAN/AMLODIPINE BESYLATE,  
 TELMISARTAN/HYDROCHLOROTHIAZIDE, VALSARTAN,  
 VALSARTAN/HYDROCHLOROTHIAZIDE }

- ALISKIREN/VALSARTAN
- AMLODIPINE BESYLATE/OLMESARTAN MEDOXOMIL
- AMLODIPINE BESYLATE/VALSARTAN
- AMLODIPINE BESYLATE/VALSARTAN/HYDROCHLOROTHIAZIDE
- AZILSARTAN MEDOXOMIL
- AZILSARTAN MEDOXOMIL/CHLORTHALIDONE
- CANDESARTAN CILEXETIL
- CANDESARTAN CILEXETIL/HYDROCHLOROTHIAZIDE
- EPROSARTAN MESYLATE
- EPROSARTAN MESYLATE/HYDROCHLOROTHIAZIDE
- IRBESARTAN
- IRBESARTAN/HYDROCHLOROTHIAZIDE
- LOSARTAN POTASSIUM
- LOSARTAN POTASSIUM/HYDROCHLOROTHIAZIDE
- OLMESARTAN MEDOXOMIL
- OLMESARTAN MEDOXOMIL/AMLODIPINE BESYLATE/HYDROCHLOROTHIAZIDE
- OLMESARTAN MEDOXOMIL/HYDROCHLOROTHIAZIDE
- TELMISARTAN
- TELMISARTAN/AMLODIPINE BESYLATE
- TELMISARTAN/HYDROCHLOROTHIAZIDE
- VALSARTAN
- VALSARTAN/HYDROCHLOROTHIAZIDE

#### *Use of Byetta*

This event measure was defined as occurring when any of the following criteria were met:

- The occurrence of **Prescription Claims** with the following attributes:
  - **NDC Brand Name** is any of: { BYETTA }
    - BYETTA

#### *Use of ACE inhibitor*

This event measure was defined as occurring when any of the following criteria were met:

- The occurrence of **Prescription Claims** with the following attributes:
  - **NDC Generic Name** is any of: { AMLODIPINE BESYLATE/BENAZEPRIL HCL, BENAZEPRIL HCL, BENAZEPRIL HCL/HYDROCHLOROTHIAZIDE, CAPTOPRIL, CAPTOPRIL/HYDROCHLOROTHIAZIDE, ENALAPRIL MALEATE, ENALAPRIL MALEATE/FELODIPINE, ENALAPRIL MALEATE/HYDROCHLOROTHIAZIDE, ENALAPRILAT DIHYDRATE, FOSINOPRIL SODIUM, FOSINOPRIL SODIUM/HYDROCHLOROTHIAZIDE, LISINOPRIL, LISINOPRIL/DIETARY SUPPLEMENT, COMB.10, LISINOPRIL/HYDROCHLOROTHIAZIDE, MOEXIPRIL HCL, MOEXIPRIL HCL/HYDROCHLOROTHIAZIDE, PERINDOPRIL ERBUMINE, QUINAPRIL HCL, QUINAPRIL HCL/HYDROCHLOROTHIAZIDE, RAMIPRIL, TRANDOLAPRIL, TRANDOLAPRIL/VERAPAMIL HCL }

- AMLODIPINE BESYLATE/BENAZEPRIL HCL
- BENAZEPRIL HCL
- BENAZEPRIL HCL/HYDROCHLOROTHIAZIDE
- CAPTOPRIL
- CAPTOPRIL/HYDROCHLOROTHIAZIDE
- ENALAPRIL MALEATE
- ENALAPRIL MALEATE/FELODIPINE
- ENALAPRIL MALEATE/HYDROCHLOROTHIAZIDE
- ENALAPRILAT DIHYDRATE
- FOSINOPRIL SODIUM
- FOSINOPRIL SODIUM/HYDROCHLOROTHIAZIDE
- LISINOPRIL
- LISINOPRIL/DIETARY SUPPLEMENT,COMB.10
- LISINOPRIL/HYDROCHLOROTHIAZIDE
- MOEXIPRIL HCL
- MOEXIPRIL HCL/HYDROCHLOROTHIAZIDE
- PERINDOPRIL ERBUMINE
- QUINAPRIL HCL
- QUINAPRIL HCL/HYDROCHLOROTHIAZIDE
- RAMIPRIL
- TRANDOLAPRIL
- TRANDOLAPRIL/VERAPAMIL HCL

*Use of acid suppressing drugs*

This event measure was defined as occurring when any of the following criteria were met:

- The occurrence of **Prescription Claims** with the following attributes:
  - **NDC Generic Name** is any of: { CIMETIDINE, CIMETIDINE HCL, CIMETIDINE HCL IN 0.9 % SODIUM CHLORIDE, DEXLANSOPRAZOLE, ESOMEPRAZOLE MAGNESIUM, ESOMEPRAZOLE SODIUM, ESOMEPRAZOLE STRONTIUM, FAMOTIDINE, FAMOTIDINE IN 0.9 % SODIUM CHLORIDE, FAMOTIDINE IN SODIUM CHLORIDE, ISO-OSMOTIC/PF, FAMOTIDINE/CALCIUM CARBONATE/MAGNESIUM HYDROXIDE, FAMOTIDINE/PF, IBUPROFEN/FAMOTIDINE, LANSOPRAZOLE, LANSOPRAZOLE/AMOXICILLIN TRIHYDRATE/CLARITHROMYCIN, LANSOPRAZOLE/NAPROXEN, NAPROXEN/ESOMEPRAZOLE MAGNESIUM, NIZATIDINE, OMEPRAZOLE, OMEPRAZOLE MAGNESIUM, OMEPRAZOLE/CLARITHROMYCIN/AMOXICILLIN TRIHYDRATE, OMEPRAZOLE/SODIUM BICARBONATE, PANTOPRAZOLE SODIUM, RABEPRAZOLE SODIUM, RANITIDINE BISMUTH CITRATE, RANITIDINE HCL, RANITIDINE HCL IN 0.45 % SODIUM CHLORIDE, RANITIDINE HCL/DIETARY SUPPLEMENT,MISC COMB17, RANITIDINE HCL/DIETARY SUPPLEMENT,MISC.COMBO8 }



- CIMETIDINE
- CIMETIDINE HCL
- CIMETIDINE HCL IN 0.9 % SODIUM CHLORIDE
- DEXLANSOPRAZOLE
- ESOMEPRAZOLE MAGNESIUM
- ESOMEPRAZOLE SODIUM
- ESOMEPRAZOLE STRONTIUM
- FAMOTIDINE
- FAMOTIDINE IN 0.9 % SODIUM CHLORIDE
- FAMOTIDINE IN SODIUM CHLORIDE, ISO-OSMOTIC/PF
- FAMOTIDINE/CALCIUM CARBONATE/MAGNESIUM HYDROXIDE
- FAMOTIDINE/PF
- IBUPROFEN/FAMOTIDINE
- LANSOPRAZOLE
- LANSOPRAZOLE/AMOXICILLIN TRIHYDRATE/CLARITHROMYCIN
- LANSOPRAZOLE/NAPROXEN
- NAPROXEN/ESOMEPRAZOLE MAGNESIUM
- NIZATIDINE
- OMEPRAZOLE
- OMEPRAZOLE MAGNESIUM
- OMEPRAZOLE/CLARITHROMYCIN/AMOXICILLIN TRIHYDRATE
- OMEPRAZOLE/SODIUM BICARBONATE
- PANTOPRAZOLE SODIUM
- RABEPRAZOLE SODIUM
- RANITIDINE BISMUTH CITRATE
- RANITIDINE HCL
- RANITIDINE HCL IN 0.45 % SODIUM CHLORIDE
- RANITIDINE HCL/DIETARY SUPPLEMENT,MISC COMB17
- RANITIDINE HCL/DIETARY SUPPLEMENT,MISC.COMBO8

### *Use of antipsychotic*

This event measure was defined as occurring when any of the following criteria were met:

- The occurrence of **Prescription Claims** with the following attributes:
  - **NDC Generic Name** is any of: { ARIPIPRAZOLE, CHLORPROMAZINE HCL, CLOZAPINE, FLUPHENAZINE DECANOATE, FLUPHENAZINE ENANTHATE, FLUPHENAZINE HCL, HALOPERIDOL, HALOPERIDOL DECANOATE, HALOPERIDOL LACTATE, ILOPERIDONE, LOXAPINE, LOXAPINE HCL, LOXAPINE SUCCINATE, MOLINDONE HCL, OLANZAPINE, OLANZAPINE PAMOATE, OLANZAPINE/FLUOXETINE HCL, PALIPERIDONE, PALIPERIDONE PALMITATE, PERPHENAZINE, PERPHENAZINE/AMITRIPTYLINE HCL, PIMOZIDE, QUETIAPINE FUMARATE, RISPERIDONE, RISPERIDONE MICROSPHERES, THIORIDAZINE HCL, THIOTHIXENE, THIOTHIXENE HCL, TRIFLUOPERAZINE HCL, ZIPRASIDONE HCL, ZIPRASIDONE MESYLATE }

- ARIPIPRAZOLE
- CHLORPROMAZINE HCL
- CLOZAPINE
- FLUPHENAZINE DECANOATE
- FLUPHENAZINE ENANTHATE
- FLUPHENAZINE HCL
- HALOPERIDOL
- HALOPERIDOL DECANOATE
- HALOPERIDOL LACTATE
- ILOPERIDONE
- LOXAPINE
- LOXAPINE HCL
- LOXAPINE SUCCINATE
- MOLINDONE HCL
- OLANZAPINE
- OLANZAPINE PAMOATE
- OLANZAPINE/FLUOXETINE HCL
- PALIPERIDONE
- PALIPERIDONE PALMITATE
- PERPHENAZINE
- PERPHENAZINE/AMITRIPTYLINE HCL
- PIMOZIDE
- QUETIAPINE FUMARATE
- RISPERIDONE
- RISPERIDONE MICROSPHERES
- THIORIDAZINE HCL
- THIOTHIXENE
- THIOTHIXENE HCL
- TRIFLUOPERAZINE HCL
- ZIPRASIDONE HCL
- ZIPRASIDONE MESYLATE

### *Use of fibrates*

This event measure was defined as occurring when any of the following criteria were met:

- The occurrence of **Prescription Claims** with the following attributes:
  - **NDC Generic Name** is any of: { FENOFIBRATE, FENOFIBRATE NANOCRYSTALLIZED, FENOFIBRATE, MICRONIZED, FENOFIBRIC ACID, FENOFIBRIC ACID (CHOLINE), GEMFIBROZIL }

- FENOFIBRATE
- FENOFIBRATE NANOCRYSTALLIZED
- FENOFIBRATE,MICRONIZED
- FENOFIBRIC ACID
- FENOFIBRIC ACID (CHOLINE)
- GEMFIBROZIL

### *Use of sedative*

This event measure was defined as occurring when any of the following criteria were met:

- The occurrence of **Prescription Claims** with the following attributes:
  - **NDC Generic Name** is any of: { ALPRAZOLAM, ALPRAZOLAM/DIETARY SUPPLEMENT,MISC COMBO NO.17, AMOBARBITAL SODIUM/SECOBARBITAL SODIUM, BUSPIRONE HCL, BUTABARBITAL SODIUM, CHLORDIAZEPOXIDE HCL, CHLORDIAZEPOXIDE HCL/METHSCOPOLAMINE NITRATE, CLONAZEPAM, CLORAZEPATE DIPOTASSIUM, DIAZEPAM, DIAZEPAM/SOYBEAN OIL, DOXEPIN HCL, ESTAZOLAM, ESZOPICLONE, ETHCHLORVYNOL, FLURAZEPAM HCL, LORAZEPAM, LORAZEPAM IN 0.9 % SODIUM CHLORIDE, LORAZEPAM/DEXTROSE 5 % IN WATER, OXAZEPAM, PENTOBARBITAL, PENTOBARBITAL SODIUM, PHENAZOPYRIDINE HCL/HYOSCYAMINE/BUTABARBITAL, QUAZEPAM, RAMELTEON, SECOBARBITAL SODIUM, TEMAZEPAM, TEMAZEPAM/DIETARY SUPPLEMENT,MISC.COMBO8, TRIAZOLAM, ZALEPLON, ZOLPIDEM TARTRATE }

- ALPRAZOLAM
- ALPRAZOLAM/DIETARY SUPPLEMENT,MISC COMBO NO.17
- AMOBARBITAL SODIUM/SECOBARBITAL SODIUM
- BUSPIRONE HCL
- BUTABARBITAL SODIUM
- CHLORDIAZEPOXIDE HCL
- CHLORDIAZEPOXIDE HCL/METHSCOPOLAMINE NITRATE
- CLONAZEPAM
- CLORAZEPATE DIPOTASSIUM
- DIAZEPAM
- DIAZEPAM/SOYBEAN OIL
- DOXEPIN HCL
- ESTAZOLAM
- ESZOPICLONE
- ETHCHLORVYNOL
- FLURAZEPAM HCL
- LORAZEPAM
- LORAZEPAM IN 0.9 % SODIUM CHLORIDE
- LORAZEPAM/DEXTROSE 5 % IN WATER
- OXAZEPAM
- PENTOBARBITAL
- PENTOBARBITAL SODIUM
- PHENAZOPYRIDINE HCL/HYOSCYAMINE/BUTABARBITAL
- QUAZEPAM
- RAMELTEON
- SECOBARBITAL SODIUM
- TEMAZEPAM
- TEMAZEPAM/DIETARY SUPPLEMENT,MISC.COMBO8
- TRIAZOLAM
- ZALEPLON
- ZOLPIDEM TARTRATE

### *Use of statins*

This event measure was defined as occurring when any of the following criteria were met:

- The occurrence of **Prescription Claims** with the following attributes:
  - **NDC Generic Name** is any of: { AMLODIPINE BESYLATE/ATORVASTATIN CALCIUM, ASPIRIN (CALCIUM CARB & MAGNESIUM BUFFERS)/PRAVASTATIN, ATORVASTATIN CALCIUM, CERIVASTATIN SODIUM, EZETIMIBE/ATORVASTATIN CALCIUM, EZETIMIBE/SIMVASTATIN, FLUVASTATIN SODIUM, LOVASTATIN, NIACIN/LOVASTATIN, NIACIN/SIMVASTATIN, PITAVASTATIN CALCIUM, PRAVASTATIN SODIUM, ROSUVASTATIN CALCIUM, SIMVASTATIN, SITAGLIPTIN PHOSPHATE/SIMVASTATIN }

- AMLODIPINE BESYLATE/ATORVASTATIN CALCIUM
- ASPIRIN (CALCIUM CARB & MAGNESIUM BUFFERS)/PRAVASTATIN
- ATORVASTATIN CALCIUM
- CERIVASTATIN SODIUM
- EZETIMIBE/ATORVASTATIN CALCIUM
- EZETIMIBE/SIMVASTATIN
- FLUVASTATIN SODIUM
- LOVASTATIN
- NIACIN/LOVASTATIN
- NIACIN/SIMVASTATIN
- PITAVASTATIN CALCIUM
- PRAVASTATIN SODIUM
- ROSUVASTATIN CALCIUM
- SIMVASTATIN
- SITAGLIPTIN PHOSPHATE/SIMVASTATIN

### *Enrollment*

This is a built-in patient attribute.

### *Gender*

This is a built-in patient attribute.

### *Region*

This measure categorizes **Region score** into the following categories:

- **Northeast:** From 1.0 (inclusive) to 2.0 (exclusive).
- **Midwest:** From 2.0 (inclusive) to 3.0 (exclusive).
- **South:** From 3.0 (inclusive) to 4.0 (exclusive).
- **West:** From 4.0 (inclusive) to (any).
- **Other:** Up to 1.0 (exclusive). *This is the referent category.*

### **References**

1. Schneeweiss S. A basic study design for expedited safety signal evaluation based on electronic healthcare data. *Pharmacoepidemiol Drug Saf.* 2010;19(8):858–868. Available at: <http://www.ncbi.nlm.nih.gov/pubmed/20681003>.
2. Vandembroucke JP, Elm E von, Altman DG, et al. Strengthening the reporting of observational studies in epidemiology (STROBE): explanation and elaboration. *Epidemiology.* 2007;18(6):805–835. Available at: <http://www.ncbi.nlm.nih.gov/pubmed/18049195>.
3. Stergachis AS. Record linkage studies for postmarketing drug surveillance: data quality and validity considerations. *Drug Intell Clin Pharm.* 1988;22(2):157–161. Available at: <http://www.ncbi.nlm.nih.gov/pubmed/3349931>.

4. Levy AR, O'Brien BJ, Sellors C, Grootendorst P, Willison D. Coding accuracy of administrative drug claims in the ontario drug benefit database. *Can J Clin Pharmacol*. 2003;10(2):67–71. Available at: <http://www.ncbi.nlm.nih.gov/pubmed/12879144>.
5. West SL, Savitz DA, Koch G, Strom BL, Guess HA, Hartzema A. Recall accuracy for prescription medications: self-report compared with database information. *Am J Epidemiol*. 1995;142(10):1103–1112. Available at: <http://www.ncbi.nlm.nih.gov/pubmed/7485055>.
6. West SL, Strom BL, Freundlich B, Normand E, Koch G, Savitz DA. Completeness of prescription recording in outpatient medical records from a health maintenance organization. *J Clin Epidemiol*. 1994;47(2):165–171. Available at: <http://www.ncbi.nlm.nih.gov/pubmed/8113825>.
7. Fischer MA, Stedman MR, Lii J, et al. Primary medication non-adherence: analysis of 195,930 electronic prescriptions. *J Gen Intern Med*. 2010;25(4):284–290. Available at: <http://www.ncbi.nlm.nih.gov/pubmed/20131023>.
8. Schneeweiss S, Avorn J. A review of uses of health care utilization databases for epidemiologic research on therapeutics. *J Clin Epidemiol*. 2005;58(4):323–337. Available at: <http://www.ncbi.nlm.nih.gov/pubmed/15862718>.
9. Ray WA. Evaluating medication effects outside of clinical trials: new-user designs. *Am J Epidemiol*. 2003;158(9):915–920. Available at: <http://www.ncbi.nlm.nih.gov/pubmed/14585769>.
10. Johnson ES, Bartman BA, Briesacher BA, et al. The incident user design in comparative effectiveness research. *Pharmacoepidemiol Drug Saf*. 2013;22(1):1–6. Available at: <http://www.ncbi.nlm.nih.gov/pubmed/23023988>.
11. Fleiss J. Determining sample sizes needed to detect a difference between two proportions (chapter 3). In: Fleiss JL, ed. *Statistical methods for rates and proportions*. Chichester, West Sussex, UK: Wiley; 1981.
12. Brookhart MA, Schneeweiss S, Rothman KJ, Glynn RJ, Avorn J, Sturmer T. Variable selection for propensity score models. *Am J Epidemiol*. 2006;163(12):1149–1156. Available at: <http://www.ncbi.nlm.nih.gov/pubmed/16624967>.
13. Myers JA, Rassen JA, Gagne JJ, et al. Effects of adjusting for instrumental variables on bias and precision of effect estimates. *Am J Epidemiol*. 2011;174(11):1213–1222. Available at: <http://www.ncbi.nlm.nih.gov/pubmed/22025356>.
14. Rosenbaum PR, Rubin DB. The central role of propensity scores in observational studies for causal effects. *Biometrika*. 1983;70(1):41–55.
15. Rubin DB. Estimating causal effects from large data sets using propensity scores. *Ann Intern Med*. 1997;127(8 Pt 2):757–763. Available at: <http://www.ncbi.nlm.nih.gov/pubmed/9382394>.
16. Sturmer T, Rothman KJ, Avorn J, Glynn RJ. Treatment effects in the presence of unmeasured confounding: dealing with observations in the tails of the propensity score distribution—a simulation study. *Am J Epidemiol*. 2010;172(7):843–854. Available at: <http://www.ncbi.nlm.nih.gov/pubmed/20716704>.

17. Walker A, Patrick, Lauer, et al. A tool for assessing the feasibility of comparative effectiveness research. *Comparative Effectiveness Research*. 2013;11.
18. Franklin JM, Rassen JA, Ackermann D, Bartels DB, Schneeweiss S. Metrics for covariate balance in cohort studies of causal effects. *Stat Med*. 2013. Available at: <http://www.ncbi.nlm.nih.gov/pubmed/24323618>.
19. Armitage P. *Statistical methods in medical research*. Oxford, Blackwell Scientific; 1971:iii–xv, 504p.
20. Akaike H. Fitting autoregressive models for prediction. *Annals of the Institute of Statistical Mathematics*. 1969;21(1):243–247. doi:10.1007/BF02532251.
21. Ghosh D. Proportional hazards regression for cancer studies. *Biometrics*. 2008;64(1):141–148. Available at: <http://www.ncbi.nlm.nih.gov/pubmed/17573863>.
22. Brookhart MA, Sturmer T, Glynn RJ, Rassen J, Schneeweiss S. Confounding control in healthcare database research: challenges and potential approaches. *Med Care*. 2010;48(6 Suppl):S114–S120. Available at: <http://www.ncbi.nlm.nih.gov/pubmed/20473199>.
23. R Core Team. *R: a language and environment for statistical computing*. Vienna, Austria: R Foundation for Statistical Computing; 2013. Available at: <http://www.R-project.org/>.
24. Hosmer DW, Hosmer T, Le Cessie S, Lemeshow S. A comparison of goodness-of-fit tests for the logistic regression model. *Stat Med*. 1997;16(9):965–980. Available at: <http://www.ncbi.nlm.nih.gov/pubmed/9160492>.
25. Belitser SV, Martens EP, Pestman WR, Groenwold RH, Boer A de, Klungel OH. Measuring balance and model selection in propensity score methods. *Pharmacoepidemiol Drug Saf*. 2011;20(11):1115–1129. Available at: <http://www.ncbi.nlm.nih.gov/pubmed/21805529>.
26. Elm E von, Altman DG, Egger M, Pocock SJ, Gøtzsche PC, Vandenbroucke JP. The strengthening of reporting of observational studies in epidemiology (STROBE) statement: guidelines for reporting observational studies. *Lancet*. 2007;370(9596):1453–1457. Available at: <http://www.ncbi.nlm.nih.gov/pubmed/18064739>.
