# Supplementary material
Source: PubMed Central journal article supplement (PMC7833029)
Supplement: NIHMS1659462-supplement-Appendix_D.pdf [file NIHMS1659462-supplement-Appendix_D.pdf]

## Appendix D. Reproduced Studies

Citation list is in alphabetical order. The ordering of study id in reproduction does not reflect alphabetical ordering in citation list.

1. Alexander Walker (2014) Esophageal Cancer and Bisphosphonates. *J Pharm Drug Devel* 1(3): 301. doi: 10.15744/2348-9782.1.301
2. Borah BJ, Carls GS, Moore BJ, Gibson TB, Moriarty JP, Stewart EA. Cost comparison between uterine-sparing fibroid treatments one year following treatment. 2014;2(1):1-12.
3. Bron, M., Guerin, A., Latremouille-Viau, D., Ionescu-Iltu, R., Viswanathan, P., Lopez, C., & Wu, E. Q. (2014). Distribution and drivers of costs in type 2 diabetes mellitus treated with oral hypoglycemic agents: a retrospective claims data analysis. *Journal of Medical Economics*, 17(9), 646-657. doi:10.3111/13696998.2014.925905
4. Cai J, Preblick R, Zhang Q, Kwong WJ. Utilization of parenteral anticoagulants and warfarin: impact on the risk of venous thromboembolism recurrence in the outpatient setting. *Am Health Drug Benefits* 2014;7(8):444-51.
5. Candrilli, S. D., Manjunath, R., Davis, K. L., & Gidal, B. E. (2010). The association between antiepileptic drug and HMG-CoA reductase inhibitor co-medication and cholesterol management in patients with epilepsy. *Epilepsy Research*, 91(2-3), 260-266. doi:10.1016/j.epilepsyres.2010.07.021
6. Cepeda, M. S., Fife, D., Ma, Q., & Ryan, P. B. (2013). Comparison of the risks of opioid abuse or dependence between tapentadol and oxycodone: results from a cohort study. *The Journal of Pain : Official Journal of the American Pain Society*, 14(10), 1227-1241. doi:10.1016/j.jpain.2013.05.010
7. Citrome L, Collins JM, Nordstrom BL, et al. Incidence of cardiovascular outcomes and diabetes mellitus among users of second-generation antipsychotics. *J Clin Psychiatry* 2013;74(12):1199-206.
8. Crockett, S. D., Schectman, R., Stuermer, T., & Kappelman, M. D. (2014). Topiramate use does not reduce flares of inflammatory bowel disease. *Digestive Diseases and Sciences*, 59(7), 1535-1543. doi:10.1007/s10620-014-3040-7
9. Dore, D. D., Hussein, M., Hoffman, C., Pelletier, E. M., Smith, D. B., & Seeger, J. D. (2013). A pooled analysis of exenatide use and risk of acute pancreatitis. *Current Medical Research and Opinion*, 29(12), 1577-1586. doi:10.1185/03007995.2013.838550
10. Farjah, F., Backhus, L. M., Varghese, T. K., Mulligan, M. S., M Cheng, A., Alfonso-Cristancho, R., et al. (2014). Ninety-day costs of video-assisted thoracic surgery versus open lobectomy for lung cancer. *The Annals of Thoracic Surgery*, 98(1), 191-196. doi:10.1016/j.athoracsur.2014.03.024
11. Funch, D., Gydesen, H., Tornoe, K., Major-Pedersen, A., & Chan, K. A. (2014). A prospective, claims-based assessment of the risk of pancreatitis and pancreatic cancer with liraglutide compared to other antidiabetic drugs. *Diabetes, Obesity & Metabolism*, 16(3), 273-275. doi:10.1111/dom.12230

12. Gill, K. S., Muntner, P., Lafayette, R. A., Petersen, J., Fink, J. C., Gilbertson, D. T., & Bradbury, B. D. (2013). Red blood cell transfusion use in patients with chronic kidney disease. *Nephrology Dialysis Transplantation*, 28(6), 1504-1515. doi:10.1093/ndt/gfs580
13. Greenbaum, A. H., Chen, J., Reed, C., Beavers, S., Callahan, D., Christensen, D., et al. (2014). Hospitalizations for Severe Lower Respiratory Tract Infections. *Pediatrics*, peds.2014-0244. doi:10.1542/peds.2014-0244
14. Hao, S. C., Hunter, T. D., Gunnarsson, C., March, J. L., White, S. A., Ladapo, J. A., & Reynolds, M. R. (2012). Acute safety outcomes in younger and older patients with atrial fibrillation treated with catheter ablation. *Catheter Ablation*, 35(2), 173-182. doi:10.1007/s10840-012-9690-5
15. Jick, S. S., & Hagberg, K. W. (2012). The risk of adverse outcomes in association with use of testosterone products: a cohort study using the UK-based general practice research database. *British Journal of Clinical Pharmacology*, 75(1), 260-270. doi:10.1111/j.1365-2125.2012.04326.x
16. Kim, E., You, M., Pikalov, A., Van-Tran, Q., & Jing, Y. (2011). One-year risk of psychiatric hospitalization and associated treatment costs in bipolar disorder treated with atypical antipsychotics: a retrospective claims database analysis. *BMC Psychiatry*, 11(1), 6. doi:10.1186/1471-244X-11-6
17. Laliberte, F., Coleman, C. I., Bookhart, B., Lefebvre, P., Cloutier, M., Damaraju, C. V., et al. (2014). Weekly risk of venous thromboembolism recurrence in patients receiving oral anticoagulants. *Current Medical Research and Opinion*, 30(8), 1513-1520. doi:10.1185/03007995.2014.915801
18. Laliberte, F., Nutescu, E. A., Lefebvre, P., Rondeau-Leclaire, J., Bookhart, B. K., LaMori, J. C., et al. (2014). Risk factors associated with myocardial infarction in venous thromboembolism patients. *Current Medical Research and Opinion*, 30(1), 27. doi:10.1185/03007995.2013.852525
19. Lang K, Bozkaya D, Patel AA, et al. Anticoagulant use for the prevention of stroke in patients with atrial fibrillation: findings from a multi-payer analysis. *BMC Health Serv Res* 2014;14(1):329.
20. Margolis, J. M., Chu, B.-C., Wang, Z. J., Copher, R., & Cavazos, J. E. (2014). Effectiveness of Antiepileptic Drug Combination Therapy for Partial-Onset Seizures Based on Mechanisms of Action. *JAMA Neurology*, 71(8), 985-993. doi:10.1001/jamaneurol.2014.808
21. Marsico, M., Mehta, V., Chastek, B., Liaw, K.-L., & Derkay, C. (2014). Estimating the incidence and prevalence of juvenile-onset recurrent respiratory papillomatosis in publicly and privately insured claims databases in the United States. *Sexually Transmitted Diseases*, 41(5), 300-305. doi:10.1097/OLQ.0000000000000115
22. Mitra, D., Davis, K. L., Beam, C., Medjedovic, J., & Rustgi, V. (2010). Treatment Patterns and Adherence among Patients with Chronic Hepatitis C Virus in a US Managed Care Population. *Value in Health*, 13(4), 479-486. doi:10.1111/j.1524-4733.2009.00691.x
23. Motsko, S. P., Russmann, S., Ming, E. E., Singh, V. P., Vendiola, R. M., & Jones, J. K. (2009). Effectiveness of rosuvastatin compared to other statins for the prevention of cardiovascular events - a cohort study in 395,039 patients from clinical practice. *Pharmacoepidemiology and Drug Safety*, 18(12), 1214-1222. doi:10.1002/pds.1843
24. Munshi, N., Mehra, M., van de Velde, H., Desai, A., Potluri, R., & Vermeulen, J. (2014). Use of a Claims Database to Characterize and Estimate the Incidence Rate for Castleman's Disease. *Leukemia & Lymphoma*, 1-32. doi:10.3109/10428194.2014.953145

25. Murray-Thomas, T., Jones, M. E., Patel, D., Brunner, E., Shatapathy, C. C., Motsko, S., & van Staa, T. P. (2013). Risk of Mortality (Including Sudden Cardiac Death) and Major Cardiovascular Events in Atypical and Typical Antipsychotic Users: A Study with the General Practice Research Database. *Cardiovascular Psychiatry and Neurology*, 2013(12), 1-15. doi:10.1046/j.1365-2125.1999.00885.x
26. Nicholas, J. M., Ridsdale, L., Richardson, M. P., Grieve, A. P., & Gulliford, M. C. (2013). Fracture risk with use of liver enzyme inducing antiepileptic drugs in people with active epilepsy: cohort study using the general practice research database. *Seizure : the Journal of the British Epilepsy Association*, 22(1), 37-42. doi:10.1016/j.seizure.2012.10.002
27. Powers, A., Faria, C., Broder, M. S., Chang, E., & Cherepanov, D. (2012). Hematologic complications, healthcare utilization, and costs in commercially insured patients with myelodysplastic syndrome receiving supportive care. *American Health & Drug Benefits*, 5(7), 455-465.
28. Suh, D.-C., Choi, J. C., Schein, J., Kim, S., & Nelson, W. W. (2013). Factors associated with warfarin discontinuation, including bleeding patterns, in atrial fibrillation patients. *Current Medical Research and Opinion*, 29(7), 761-771. doi:10.1185/03007995.2013.795142
29. Walker, A. M., & Bennett, D. (2008). Epidemiology and outcomes in patients with atrial fibrillation in the United States. *Heart Rhythm : the Official Journal of the Heart Rhythm Society*, 5(10), 1365-1372. doi:10.1016/j.hrthm.2008.07.014
30. Wu J, Thammakhoune J, Dai W, et al. Assessment of Dronedarone Utilization Using US Claims Databases. *Clin Ther* 2014;36(2):264-272.e2.
31. Xie, L., Zhou, S., Pinsky, B. W., Buysman, E. K., & Baser, O. (2014). Impact of initiating insulin glargine disposable pen versus vial/syringe on real-world glycemic outcomes and persistence among patients with type 2 diabetes mellitus in a large managed care plan: a claims database analysis. *Diabetes Technology & Therapeutics*, 16(9), 567-575. doi:10.1089/dia.2013.0312
